# Supplementary material for: Tropical cities research boundaries: a bibliometric analysis to bridge the gaps through multi-dimensional and cross-disciplinary features
Source: Frontiers journal article supplement (doi:10.3389/frsc.2023.1154667), 2023-07-18
Supplement: Table_1.xlsx [file Table_1.xlsx]

## Sheet: legend
Tags
AU	Authors
AB	Abstract
AR	Article Number
C1	Author Address
DE	Author Keywords
DI	Digital Object Identifier (DOI)
DT	Document Type
FU	Funding Agency and Grant Number
FX	Funding Text
ID	Keywords Plus®
JI	ISO Source Abbreviation
LA	Language
PM	PubMed ID
PN	Part Number
PU	Publisher
PY	Year Published
RP	Reprint Address
SN	International Standard Serial Number (ISSN)
SO	Publication Name
TC	Web of Science Core Collection Times Cited Count
TI	Document Title
VL	Volume
SA	Studied areas*
LAT1	Latitude 1
LON1	Longitude 1
LAT2	Latitude 2
LON2	Longitude 2
*	Most of the studies focus only on a single tropical city, for those that encompass several cities in the same province or state, the province/state was considered as the study area, in a similar way to papers that study several cities in a country. For global studies it was marked "global".

## Sheet: climate_change_data
AU	AB	AR	C1	DE	DI	DT	FU	FX	ID	JI	LA	PM	PN	PU	PY	RP	SN	SO	TC	TI	VL	SA	LAT1	LON1	LAT2	LON2
VAILSHERY L;JAGANMOHAN M;NAGENDRA H	ONE OF THE FASTEST GROWING CITIES IN INDIA, BANGALORE IS FACING CHALLENGES OF URBAN MICROCLIMATE CHANGE AND INCREASING LEVELS OF AIR POLLUTION. THIS PAPER ASSESSES THE IMPACT OF STREET TREES IN MITIGATING THESE ISSUES. AT TWENTY LOCATIONS IN THE CITY, WE COMPARE SEGMENTS OF ROADS WITH AND WITHOUT TREES, ASSESSING THE RELATIONSHIP OF ENVIRONMENTAL DIFFERENCES WITH THE PRESENCE OR ABSENCE OF STREET…		ATREE, BANGALORE 560064, KARNATAKA, INDIA.;	CLIMATE CHANGE; SUSTAINABILITY; TREE PLANTATION; URBAN FORESTS; URBAN HEAT ISLANDS	10.1016/j.ufug.2013.03.002	ARTICLE	STOCKHOLM RESILIENCE CENTRE; DEPARTMENT OF SCIENCE AND TECHNOLOGY, GOVERNMENT OF INDIA	WE THANK THE DEPARTMENTS OF ENVIRONMENTAL SCIENCE AT ST. JOSEPHS COLLEGE OF ARTS AND SCIENCE AND MOUNT CARMEL COLLEGE, BANGALORE, FOR THEIR COOPERATION WITH THIS RESEARCH, AND ARE ESPECIALLY APPRECIATIVE OF THE SUPPORT PROVIDED BY M.R.E. WILSON, B.S. PRABHAKAR, AND HELEN KENNEDY. WE ALSO THANK SUPARSH NAGENDRAN, RICHA CHOWDHARY, SIDDHARTH JUDE MACHADO AND VIGNESH S. FOR THEIR ASSISTANCE WITH FIEL…	URBAN HEAT-ISLAND; SURFACE-TEMPERATURE; THERMAL COMFORT; HUMID CITY; QUALITY; COLOMBO; IMPACT	URBAN FOR. URBAN GREEN.	ENGLISH			ELSEVIER GMBH	2013	NAGENDRA, H (AUTOR CORRESPONDENTE), ATREE, JAKKUR PO, BANGALORE 560064, KARNATAKA, INDIA.	1618-8667	URBAN FORESTRY & URBAN GREENING	127	EFFECT OF STREET TREES ON MICROCLIMATE AND AIR POLLUTION IN A TROPICAL CITY	12	Bangalore, India	12.9716	77.5946	-	-
SILVA T;VINCON-LEITE B;LEMAIRE B;PETRUCCI G;GIANI A;FIGUEREDO C;NASCIMENTO N	WORLDWIDE, EUTROPHICATION AND CYANOBACTERIA BLOOMS IN LAKES AND RESERVOIRS ARE A GREAT CONCERN FOR WATER RESOURCES MANAGEMENT. COUPLING A CATCHMENT HYDROLOGICAL MODEL AND A LAKE MODEL HAS BEEN A STRATEGY TO ASSESS THE IMPACT OF LAND USE, AGRICULTURAL PRACTICES AND CLIMATE CHANGE ON WATER QUALITY. HOWEVER, RESEARCH HAS MAINLY FOCUSED ON LARGE LAKES, WHILE URBAN RESERVOIRS AND THEIR CATCHMENTS, ESP…	946	UNIV FED MINAS GERAIS, DEPT HYDRAUL ENGN & WATER RESOURCES, 6627 AV ANTONIO CARLOS, BR-31270901 BELO HORIZONTE, MG, BRAZIL.; UPEC, ECOLE PONTS PARIS TECH, AGROPARISTECH, LEESU, F-77455 MARNE LA VALLEE, FRANCE.; PROLOG INGN, 5-7 RUE METZ, F-75010 PARIS, FRANCE.; UNIV FED MINAS GERAIS, INST BIOL SCI, DEPT BOT, 6627 AV ANTONIO CARLOS, BR-31270901 BELO HORIZONTE, MG, BRAZIL.;	LAKE ECOLOGICAL MODELLING; SWMM; DYRESM-CAEDYM; RUNOFF WATER QUALITY; LAKE PAMPULHA; TROPICAL RESERVOIRS	10.3390/w11050946	ARTICLE	BRAZILIAN AGENCY FINEP (FINANCIADORA DE INOVACAO E PESQUISA); BRAZILIAN AGENCY CNPQ; CAPES; ECOLE DES PONTS PARIS TECH; UFMG	THIS RESEARCH WAS CONDUCTED WITHIN THE STORMWATER MANAGEMENT PROJECT (MAPLU 2 PROJECT) FUNDED BY THE BRAZILIAN AGENCIES FINEP (FINANCIADORA DE INOVACAO E PESQUISA) AND CNPQ. A. GIANI AND N. NASCIMENTO ARE CNPQ FELLOWS (BRAZILIAN RESEARCHER FELLOWSHIP PROGRAM). CAPES AND ECOLE DES PONTS PARIS TECH FUNDED TALITA SILVA'S SCHOLARSHIP. UFMG FUNDED PUBLISHING COSTS.	WATER-QUALITY; CLIMATE-CHANGE; LAND-USE; NUTRIENT LOAD; ALGAL BLOOMS; PHYTOPLANKTON; MODEL; MANAGEMENT; CATCHMENT; CALIBRATION	WATER	ENGLISH			MDPI	2019	SILVA, TFG (AUTOR CORRESPONDENTE), UNIV FED MINAS GERAIS, DEPT HYDRAUL ENGN & WATER RESOURCES, 6627 AV ANTONIO CARLOS, BR-31270901 BELO HORIZONTE, MG, BRAZIL.		WATER	15	IMPACT OF URBAN STORMWATER RUNOFF ON CYANOBACTERIA DYNAMICS IN A TROPICAL URBAN LAKE	11	Belo Horizonte, Brazil	-19.9173	-43.9346	-	-
JOCHNER S;ALVES-EIGENHEER M;MENZEL A;MORELLATO L	THE STUDY OF URBAN PHENOLOGY IS RELEVANT TO ASSESS THE EFFECTS OF HEAT ISLANDS AND THE POTENTIAL IMPACTS OF CLIMATE CHANGE ON PLANTS. TEMPERATURE IS THE MAIN FACTOR REGULATING PLANT DEVELOPMENT IN MOIST/TEMPERATE REGIONS. HOWEVER, PLANTS IN TROPICAL CITIES MAY RESPOND TO ADDITIONAL ENVIRONMENTAL CUES, SUCH AS AIR HUMIDITY. WE EXAMINED WHETHER DIFFERENCES IN AIR TEMPERATURE AND HUMIDITY ALONG AN U…		TECH UNIV MUNICH, DEPT ECOL & ECOSYST MANAGEMENT, D-85354 FREISING WEIHENSTEPHAN, GERMANY.; UNIV ESTADUAL PAULISTA UNESP, PLANT PHENOL & SEED DISPERSAL GRP, INST BIOL, DEPT BOT,LAB FENOL, RIO CLARO, SP, BRAZIL.;	BBCH; BRAZIL; GERMANY; HUMIDITY; PHENOLOGY; TEMPERATURE; URBAN CLIMATE	10.1002/joc.3651	ARTICLE	DEUTSCHE FORSCHUNGSGEMEINSCHAFT (DFG) [ME 179/3-1]; EUROPA MOBEL-UMWELTSTIFTUNG; CAPES/PROBAL [360/11]; FAPESP (FUNDACAO DE APOIO A PESQUISA DO ESTADO DE SAO PAULO) [2009/54208-6]; CNPQ (COORDENACAO NACIONAL DE PESQUISA); DAAD (GERMAN ACADEMIC EXCHANGE SERVICE) [50752579]	THE RESEARCH CONDUCTED IN GERMANY WAS SUPPORTED BY THE GRANT ME 179/3-1 OF THE DEUTSCHE FORSCHUNGSGEMEINSCHAFT (DFG) AND THE EUROPA MOBEL-UMWELTSTIFTUNG; THE RESEARCH CONDUCTED IN BRAZIL BY CAPES/PROBAL (360/11), FAPESP (FUNDACAO DE APOIO A PESQUISA DO ESTADO DE SAO PAULO, 2009/54208-6), CNPQ (COORDENACAO NACIONAL DE PESQUISA) AND DAAD (GERMAN ACADEMIC EXCHANGE SERVICE, 50752579). MAE RECEIVED A …	CLIMATE-CHANGE; HUMAN HEALTH; SPRING TEMPERATURES; BIRCH POLLEN; URBANIZATION; RESPONSES; FOREST; DATES; IMPACT; AREAS	INT. J. CLIMATOL.	ENGLISH			WILEY	2013	JOCHNER, S (AUTOR CORRESPONDENTE), TECH UNIV MUNICH, DEPT ECOL & ECOSYST MANAGEMENT, HANS CARL VON CARLOWITZ PL 2, D-85354 FREISING WEIHENSTEPHAN, GERMANY.	0899-8418	INTERNATIONAL JOURNAL OF CLIMATOLOGY	35	USING PHENOLOGY TO ASSESS URBAN HEAT ISLANDS IN TROPICAL AND TEMPERATE REGIONS	33	Campinas, Brazil	-22.9329	-47.0738	-	-
LO K;KORALEGEDARA S	CITIES ARE BECOMING INCREASINGLY VULNERABLE TO WATER-RELATED ISSUES DUE TO RAPID URBANIZATION, INSTALLATION OF COMPLEX INFRASTRUCTURE AND CHANGES IN RAINFALL PATTERNS. THIS STUDY AIMS AT ASSESSING THE IMPACTS OF CLIMATE CHANGE ON RAINWATER HARVESTING SYSTEMS (RWH) IN THE TROPICAL URBAN CITY, COLOMBO, SRI LANKA. THE FUTURE CLIMATE CHANGE PROJECTIONS ARE DOWNSCALED FROM GLOBAL CIRCULATION MODELS TO…		GRADUATE INSTITUTE OF EARTH SCIENCE, CHINESE CULTURE UNIVERSITY, 55, HWA-KANG RD., YANGMINGSHAN, TAIPEI, 11114, TAIWAN; RESEARCH CENTER FOR ENVIRONMENTAL CHANGES, ACADEMIA SINICA, NANKANG, TAIPEI, 115, TAIWAN; COLLEGE OF EARTH SCIENCE, NATIONAL CENTRAL UNIVERSITY, TAOYUAN, JHONGLI CITY, 32001, TAIWAN	GCM; LARS-WG; RAINFALL SIMULATION; WEATHER GENERATOR	10.3390/environments2010105	ARTICLE		NA NA NA		ENVIRON. - MDPI	ENGLISH		1	MDPI AG	2015	LO, K.F.A.; GRADUATE INSTITUTE OF EARTH SCIENCE, 55, HWA-KANG RD., YANGMINGSHAN, TAIWAN; EMAIL: ANDREWLO@FACULTY.PCCU.EDU.TW	20763298	ENVIRONMENTS - MDPI	21	EFFECTS OF CLIMATE CHANGE ON URBAN RAINWATER HARVESTING IN COLOMBO CITY SRI LANKA	2	Colombo, Sri Lanka	6.92708	79.8612	-	-
PERERA N;EMMANUEL R	INTEGRATING CLIMATE-SENSITIVE DESIGN WITH THE LOCAL PLANNING PROCESS IS FUNDAMENTAL TO MANAGING THE WARMING TREND IN THE GROWING HIGH-DENSITY TROPICAL CITIES. HOWEVER, THE CURRENT PLANNING REGIME IS YET TO ADDRESS THE CHALLENGES POSED BY LOCAL, REGIONAL AND GLOBAL WARMING. AN IN-DEPTH UNDERSTANDING OF THE INTERACTION BETWEEN THE PHYSICAL FORM AND THE CLIMATIC CONTEXT IS BEGINNING TO EMERGE BUT, D…		UNIV MORATUWA, DEPT ARCHITECTURE, MORATUWA, SRI LANKA.; GLASGOW CALEDONIAN UNIV, SCH ENGN & BUILT ENVIRONM, GLASGOW, LANARK, SCOTLAND.;	WARM HUMID TROPICS; LOCAL CLIMATE ZONE; URBAN PLANNING; CLIMATE SENSITIVE DESIGN	10.1016/j.uclim.2016.11.006	ARTICLE			OUTDOOR THERMAL COMFORT; HEAT-ISLAND; HUMID CITY; MICROCLIMATE; ADAPTATION; CITIES; DESIGN; HOT; INFORMATION; MANAGEMENT	URBAN CLIM.	ENGLISH			ELSEVIER	2018	PERERA, NGR (AUTOR CORRESPONDENTE), UNIV MORATUWA, DEPT ARCHITECTURE, MORATUWA, SRI LANKA.	2212-0955	URBAN CLIMATE	65	A LOCAL CLIMATE ZONE BASED APPROACH TO URBAN PLANNING IN COLOMBO SRI LANKA	23	Colombo, Sri Lanka	6.92708	79.8612	-	-
HERATH H;HALWATURA R;JAYASINGHE G	INCORPORATION OF STRATEGIC GREEN INFRASTRUCTURE INTO URBAN SETTINGS HAS A POTENTIAL TO MITIGATE CLIMATE CHANGE, URBAN HEAT ISLAND (UHI) EFFECT, FLOOD RISK AND SUBSEQUENT INCREASE IN QUALITY OF HUMAN LIFE IN GENERAL. UHI INDUCES THROUGH LOW SURFACE ALBEDO, BUILDING GEOMETRY AND ABSENCE OF GREENERY AND IT DETERIORATES THE THERMAL COMFORT AND WELL-BEING OF CITY DWELLERS AND OCCUPANTS. THIS STUDY EXA…		UNIV RUHUNA, FAC AGR, MAPALANA, KAMBURUPITIYA, SRI LANKA.; UNIV MORATUWA, FAC ENGN, KATUBEDDA, MORATUWA, SRI LANKA.; UNIV MELBOURNE, DEPT AGR & FOOD SYST, MELBOURNE, VIC, AUSTRALIA.;	ENVI-MET; GREEN INFRASTRUCTURE; MICROCLIMATIC MITIGATION STRATEGIES; URBAN HEAT ISLAND; URBANIZATION	10.1016/j.ufug.2017.11.013	ARTICLE			OUTDOOR THERMAL COMFORT; CLIMATE; MITIGATION; ROOFS; VEGETATION; IMPACTS; HEALTH; ALBEDO; ENERGY; CANYON	URBAN FOR. URBAN GREEN.	ENGLISH			ELSEVIER GMBH	2018	HERATH, HMPIK (AUTOR CORRESPONDENTE), UNIV RUHUNA, FAC AGR, MAPALANA, KAMBURUPITIYA, SRI LANKA.	1618-8667	URBAN FORESTRY & URBAN GREENING	60	EVALUATION OF GREEN INFRASTRUCTURE EFFECTS ON TROPICAL SRI LANKAN URBAN CONTEXT AS AN URBAN HEAT ISLAND ADAPTATION STRATEGY	29	Colombo, Sri Lanka	6.92708	79.8612	-	-
DAYATHILAKE D;LOKUPITIYA E;WIJERATNE V	WETLANDS HOLD SIGNIFICANT POTENTIAL FOR CLIMATE CHANGE MITIGATION DUE TO THEIR HIGH CAPACITY TO SEQUESTER ATMOSPHERIC CARBON DIOXIDE (CO2). COLOMBO, SRI LANKA WAS RECENTLY DECLARED AS ONE OF THE EIGHTEEN GLOBAL RAMSAR WETLAND CITIES. THE CURRENT STUDY REPRESENTS THE FIRST ATTEMPT TO QUANTIFY SOIL ORGANIC CARBON (SOC) STOCKS HELD BY THE URBAN FRESHWATER WETLANDS IN COLOMBO. THE STUDY FOCUSED ON TH…	29	UNIV COLOMBO, DEPT ZOOL & ENVIRONM SCI, POB 1490, COLOMBO 03, SRI LANKA.; UNIV COLOMBO, DEPT GEOG, COLOMBO 03, SRI LANKA.;	SOIL ORGANIC CARBON STOCK; TROPICAL URBAN WETLANDS; HISTOSOLS	10.1007/s13157-021-01424-7	ARTICLE	UNIVERSITY OF COLOMBO, SRI LANKA	THIS RESEARCH WAS FUNDED BY THE UNIVERSITY OF COLOMBO, SRI LANKA.	ORGANIC-CARBON; SEQUESTRATION; PEATLANDS; BALANCE; TREE	WETLANDS	ENGLISH			SPRINGER	2021	DAYATHILAKE, DDTL (AUTOR CORRESPONDENTE), UNIV COLOMBO, DEPT ZOOL & ENVIRONM SCI, POB 1490, COLOMBO 03, SRI LANKA.	0277-5212	WETLANDS	2	ESTIMATION OF SOIL CARBON STOCKS OF URBAN FRESHWATER WETLANDS IN THE COLOMBO RAMSAR WETLAND CITY AND THEIR POTENTIAL ROLE IN CLIMATE CHANGE MITIGATION	41	Colombo, Sri Lanka	6.92708	79.8612	-	-
MOHAN M;KANDYA A	DIURNAL TEMPERATURE RANGE (DTR) IS AN IMPORTANT CLIMATE CHANGE INDEX. ITS KNOWLEDGE IS IMPORTANT TO A RANGE OF ISSUES AND THEMES IN EARTH SCIENCES CENTRAL TO URBAN CLIMATOLOGY AND HUMAN-ENVIRONMENT INTERACTIONS. THE PRESENT STUDY INVESTIGATES THE EFFECT OF URBANIZATION ON THE LAND SURFACE TEMPERATURE (LST) BASED DTR. THIS STUDY PRESENTS SPATIAL AND TEMPORAL VARIATIONS OF SATELLITE BASED ESTIMATES…		INDIAN INST TECHNOL DELHI, CTR ATMOSPHER SCI, NEW DELHI 110016, INDIA.;	DIURNAL TEMPERATURE RANGE; LAND SURFACE TEMPERATURE; URBAN HEAT ISLANDS; REMOTE SENSING; GIS; DELHI	10.1016/j.scitotenv.2014.11.006	ARTICLE	INDIAN SPACE RESEARCH ORGANIZATION (ISRO) [RPO 1914]; CENTRE OF ATMOSPHERIC SCIENCES, IIT DELHI, NEW DELHI; DEPARTMENT OF CIVIL ENGINEERING, INSTITUTE OF TECHNOLOGY, NIRMA UNIVERSITY, AHMEDABAD	THE AUTHORS WOULD LIKE TO THANK THE SUPPORT EXTENDED BY THE INDIAN SPACE RESEARCH ORGANIZATION (ISRO) BY FUNDING THE RESEARCH PROJECT 'DYNAMICS OF URBAN POLLUTION - A CURATIVE STRATEGY USING RS AND GIS TECHNIQUES: A CASE STUDY OF MEGA CITY DELHI' (RPO 1914), AHMEDABAD FOR THE NEEDED COMPUTING FACILITIES FOR CARRYING OUT THE MAPPING WORK. SUPPORT EXTENDED BY THE CENTRE OF ATMOSPHERIC SCIENCES, IIT…	SURFACE AIR-TEMPERATURE; UNITED-STATES; HEAT-ISLAND; CLIMATE-CHANGE; VALIDATION; TRENDS; MORTALITY; MAXIMUM; ASYMMETRY; DEATHS	SCI. TOTAL ENVIRON.	ENGLISH	25437763		ELSEVIER SCIENCE BV	2015	MOHAN, M (AUTOR CORRESPONDENTE), INDIAN INST TECHNOL DELHI, CTR ATMOSPHER SCI, NEW DELHI 110016, INDIA.	0048-9697	SCIENCE OF THE TOTAL ENVIRONMENT	121	IMPACT OF URBANIZATION AND LANDUSELANDCOVER CHANGE ON DIURNAL TEMPERATURE RANGE A CASE STUDY OF TROPICAL URBAN AIRSHED OF INDIA USING REMOTE SENSING DATA	506	Delhi, India	28.7041	77.1025	-	-
MANOLI G;FATICHI S;SCHLAPFER M;YU K;CROWTHER T;MEILI N;BURLANDO P;KATUL G;BOU-ZEID E	URBAN HEAT ISLANDS (UHIS) EXACERBATE THE RISK OF HEAT-RELATED MORTALITY ASSOCIATED WITH GLOBAL CLIMATE CHANGE. THE INTENSITY OF UHIS VARIES WITH POPULATION SIZE AND MEAN ANNUAL PRECIPITATION, BUT A UNIFYING EXPLANATION FOR THIS VARIATION IS LACKING, AND THERE ARE NO GEOGRAPHICALLY TARGETED GUIDELINES FOR HEAT MITIGATION. HERE WE ANALYSE SUMMERTIME DIFFERENCES BETWEEN URBAN AND RURAL SURFACE TEMPE…		SWISS FED INST TECHNOL, INST ENVIRONM ENGN, ZURICH, SWITZERLAND.; SWISS FED INST TECHNOL, SINGAPORE ETH CTR, FUTURE CITIES LAB, SINGAPORE, SINGAPORE.; SWISS FED INST TECHNOL, DEPT ENVIRONM SYST SCI, ZURICH, SWITZERLAND.; DUKE UNIV, NICHOLAS SCH ENVIRONM, DURHAM, NC 27708 USA.; PRINCETON UNIV, DEPT CIVIL & ENVIRONM ENGN, PRINCETON, NJ 08544 USA.; UCL, DEPT CIVIL ENVIRONM & GEOMAT ENGN, LONDON, ENG…		10.1038/s41586-019-1512-9	ARTICLE	THE BRANCO WEISS FELLOWSHIPSOCIETY IN SCIENCE; US NATIONAL SCIENCE FOUNDATION [ICER 1664091]; ARMY RESEARCH OFFICE [W911NF-15-1-0003]; FUTURE CITIES LABORATORY AT THE SINGAPORE-ETH CENTRE; SINGAPORE'S NATIONAL RESEARCH FOUNDATION [FI 370074016]; SRN [1444758]	G.M. WAS SUPPORTED BY THE THE BRANCO WEISS FELLOWSHIPSOCIETY IN SCIENCE ADMINISTERED BY ETH ZURICH. E.B.-Z. ACKNOWLEDGES SUPPORT BY THE US NATIONAL SCIENCE FOUNDATION UNDER GRANT NO. ICER 1664091, THE SRN UNDER COOPERATIVE AGREEMENT NO. 1444758, AND THE ARMY RESEARCH OFFICE UNDER CONTRACT W911NF-15-1-0003 (PROGRAM MANAGER J. BARZYK). M. S. WAS SUPPORTED BY THE FUTURE CITIES LABORATORY AT THE SING…	GREEN SPACE; PRECIPITATION; VENTILATION; DENSITY; IMPACT; ALBEDO; CITIES; WINTER	NATURE	ENGLISH	31485056		NATURE PORTFOLIO	2019	MANOLI, G (AUTOR CORRESPONDENTE), SWISS FED INST TECHNOL, INST ENVIRONM ENGN, ZURICH, SWITZERLAND.; MANOLI, G (AUTOR CORRESPONDENTE), UCL, DEPT CIVIL ENVIRONM & GEOMAT ENGN, LONDON, ENGLAND.	0028-0836	NATURE	262	MAGNITUDE OF URBAN HEAT ISLANDS LARGELY EXPLAINED BY CLIMATE AND POPULATION	573	Global	-	-	-	-
EMMANUEL R	CLIMATE CHANGE WILL BRING MORE HEAT EXTREMES TO THE ALREADY WARM TROPICAL AREAS IN ASIA, AFRICA AND LATIN AMERICA. THE RESULTING SURGE IN COOLING DEMAND WILL ONLY MAKE THE THERMAL DISCOMFORT IN TROPICAL CITIES EVEN WORSE. THIS PAPER PRESENTS EVIDENCE TO THE APPROACHING AIR CONDITIONED COOLING LOAD DELUGE AND SHOWS WHY THE AIR CONDITIONED MANAGEMENT OF COOLING LOAD IS PARTICULARLY PROBLEMATIC IN T…		GLASGOW CALEDONIAN UNIV, GLASGOW, LANARK, SCOTLAND.;	TROPICAL URBAN CLIMATE; URBAN DESIGN; THERMAL COMFORT; COOLING LOAD; URBAN HEAT ISLAND	10.1016/j.uclim.2017.01.002	ARTICLE			CLIMATE-CHANGE; THERMAL COMFORT; NATURAL VENTILATION; URBAN TEMPERATURE; ENERGY DEMAND; CITIES; ENVIRONMENTS; ADAPTATION; TRENDS; APARTMENTS	URBAN CLIM.	ENGLISH			ELSEVIER	2018	EMMANUEL, R (AUTOR CORRESPONDENTE), GLASGOW CALEDONIAN UNIV, GLASGOW, LANARK, SCOTLAND.	2212-0955	URBAN CLIMATE	14	PERFORMANCE STANDARD FOR TROPICAL OUTDOORS A CRITIQUE OF CURRENT IMPASSE AND A PROPOSAL FOR WAY FORWARD	23	Global	-	-	-	-
MARCOTULLIO P;KESSLER C;GONZALEZ R;SCHMELTZ M	THIS RESEARCH DESCRIBES THE CHANGE IN TEMPERATURES ACROSS APPROXIMATELY 270 TROPICAL CITIES FROM 1960 TO 2020 WITH A FOCUS ON URBAN WARMING. IT ASSOCIATES URBAN GROWTH INDICATORS WITH TEMPERATURE VARIATIONS IN TROPICAL CLIMATE ZONES (TROPICAL RAINFOREST, TROPICAL MONSOON, AND TROPICAL WET-DRY SAVANNA). OUR FINDINGS DEMONSTRATE THAT OVER TIME WHILE TEMPERATURES HAVE INCREASED ACROSS THE TROPICS, U…	616626	CUNY, HUNTER COLL, INST SUSTAINABLE CITIES, DEPT GEOG & ENVIRONM SCI, NEW YORK, NY 10021 USA.; BOCHUM UNIV APPL SCI, DEPT GEODESY, BOCHUM, GERMANY.; AALBORG UNIV, TECH FAC IT & DESIGN, DEPT PLANNING, COPENHAGEN, DENMARK.; CALIF STATE UNIV HAYWARD, DEPT PUBL HLTH, HAYWARD, CA 94542 USA.;	URBANIZATION; URBAN WARMING; URBAN DENSITY; TROPICS; ECOSYSTEM SERVICES	10.3389/fevo.2021.616626	ARTICLE	EUROPEAN UNION'S HORIZON 2020 RESEARCH AND INNOVATION PROGRAMME [870649]; ASIA PACIFIC NETWORK FOR GLOBAL CHANGE RESEARCH (APN) [CRRP2017-01MY]	THIS RESEARCH HAS BEEN PARTIALLY FUNDED BY THE EUROPEAN UNION'S HORIZON 2020 RESEARCH AND INNOVATION PROGRAMME UNDER GRANT ID 870649 AND THE ASIA PACIFIC NETWORK FOR GLOBAL CHANGE RESEARCH (APN) UNDER GRANT ID CRRP2017-01MY-MARCOTULLIO.	SURFACE AIR-TEMPERATURE; ECOSYSTEM SERVICES; ISLAND; URBANIZATION; SUMMER; DESIGN; CITIES; CITY; VEGETATION; RESOLUTION	FRONT. ECOL. EVOL.	ENGLISH			FRONTIERS MEDIA SA	2021	MARCOTULLIO, PJ (AUTOR CORRESPONDENTE), CUNY, HUNTER COLL, INST SUSTAINABLE CITIES, DEPT GEOG & ENVIRONM SCI, NEW YORK, NY 10021 USA.	2296-701X	FRONTIERS IN ECOLOGY AND EVOLUTION	4	URBAN GROWTH AND HEAT IN TROPICAL CLIMATES	9	Global	-	-	-	-
TABUCANON A;KURISU K;HANAKI K	CLIMATE CHANGE-INDUCED FLOODS IN TROPICAL URBAN AREAS HAVE PRESENTED A SERIOUS GLOBAL CHALLENGE BECAUSE OF FAILED CONVENTIONAL STORMWATER MANAGEMENT PRACTICES. THIS RESEARCH AIMS TO DEVELOP A COMPREHENSIVE METHODOLOGICAL FRAMEWORK FOR FLOOD DAMAGE ESTIMATION AND MITIGATION, PARTICULARLY IN A TROPICAL URBAN CITY. IN THIS STUDY, INTERDISCIPLINARY FIELDS WERE INTEGRATED THROUGH STATISTICAL DOWNSCALI…	147983	UNIV TOKYO, DEPT URBAN ENGN, BUNKYO KU, 7-3-1 HONGO, TOKYO 1138656, JAPAN.;	GENERAL CIRCULATION MODEL; HYDROLOGIC-HYDRAULIC MODEL; STATISTICAL DOWNSCALING; URBAN FLOOD DAMAGE; FLOOD-BORNE DISEASES; FLOOD MITIGATION	10.1016/j.scitotenv.2021.147983	ARTICLE	UNIVERSITY OF TOKYO	THEWORK IS DONE BY THE SUPPORT OF THE UNIVERSITY OF TOKYO, AS PART OF PH.D. STUDY. THERE IS NO GRANTING NUMBER.	EXTREME PRECIPITATION; UNCERTAINTY ANALYSIS; LAND MANAGEMENT; AGROFORESTRY; TEMPERATURE; ADAPTATION; SIMULATION; IMPACTS; EVENTS; TRENDS	SCI. TOTAL ENVIRON.	ENGLISH	34082213		ELSEVIER	2021	TABUCANON, AS (AUTOR CORRESPONDENTE), MAHIDOL UNIV, FAC ENVIRONM & RESOURCE STUDIES, 999 PHUTTHAMONTHON 4 RD, SALAYA 73170, NAKHON PATHOM, THAILAND.	0048-9697	SCIENCE OF THE TOTAL ENVIRONMENT	3	ASSESSMENT AND MITIGATION OF TANGIBLE FLOOD DAMAGES DRIVEN BY CLIMATE CHANGE IN A TROPICAL CITY HAT YAI MUNICIPALITY SOUTHERN THAILAND	789	Hat Yai, Thailand	7.00205	100.457	-	-
BADARINATH K;SHARMA A;KASKAOUTIS D;KHAROL S;KAMBEZIDIS H	THE PRESENT WORK EXAMINES THE MULTIDECADAL CHANGES IN THE NET DOWNWARD SHORTWAVE RADIATION (NDSWR) OVER THE URBAN REGION OF HYDERABAD, INDIA, DURING THE PERIOD 1979-2005. THE TRENDS IN NDSWR AND IN CLOUD OPTICAL DEPTH (COD) ARE ANALYZED OVER THE REGION USING THE MODERN ERA RETROSPECTIVE-ANALYSIS FOR RESEARCH AND APPLICATIONS (MERRA 2D), WHICH IS A NEWLY AVAILABLE DATA SET. THE NDSWR EXHIBITS A SI…	D21208	GOVT INDIA, ATMOSPHER SCI SECT, DIV OCEANOG, NATL REMOTE SENSING CTR,DEPT SPACE, HYDERABAD 500625, ANDHRA PRADESH, INDIA.; NATL OBSERV ATHENS, ATMOSPHER RES TEAM, INST ENVIRONM RES & SUSTAINABLE DEV, GR-11810 ATHENS, GREECE.;		10.1029/2009JD013694	ARTICLE	ISRO-GBP	THE AUTHORS THANK THE DIRECTOR, NRSC, AND THE DEPUTY DIRECTOR, RS&GIS-AA, NRSC, FOR NECESSARY HELP AT VARIOUS STAGES AND ISRO-GBP FOR FUNDING SUPPORT. THE AUTHORS ALSO THANK THE MODIS AND MERRA 2D SCIENCE DATA SUPPORT TEAM FOR PROCESSING DATA VIA THE GIOVANNI WEB SITE (HTTP://GIOVANNI.GSFC.NASA.GOV/).	ATMOSPHERIC BROWN CLOUDS; GLOBAL RADIATION; SURFACE-TEMPERATURE; CLIMATE-CHANGE; SATELLITE DATA; OPTICAL DEPTH; IRRADIANCE; TRENDS; IMPACT; VARIABILITY	J. GEOPHYS. RES.-ATMOS.	ENGLISH			AMER GEOPHYSICAL UNION	2010	BADARINATH, KVS (AUTOR CORRESPONDENTE), GOVT INDIA, ATMOSPHER SCI SECT, DIV OCEANOG, NATL REMOTE SENSING CTR,DEPT SPACE, HYDERABAD 500625, ANDHRA PRADESH, INDIA.	2169-897X	JOURNAL OF GEOPHYSICAL RESEARCH-ATMOSPHERES	34	SOLAR DIMMING OVER THE TROPICAL URBAN REGION OF HYDERABAD INDIA EFFECT OF INCREASED CLOUDINESS AND INCREASED ANTHROPOGENIC AEROSOLS	115	Hyderabad, India	17.385	78.4867	-	-
VAN D W J;BROUSSE O;ARNALSTEEN L;BYARUGABA D;DDUMBA D;DEMUZERE M;LWASA S;NSANGI G;SSEVIIRI H;THIERY W;VANHAEREN R;WOUTERS H;VAN L N	RAPID AND UNCONTROLLED URBANIZATION IN TROPICAL AFRICA IS INCREASINGLY LEADING TO UNPRECEDENTED SOCIO-ECONOMICAL AND ENVIRONMENTAL CHALLENGES IN CITIES, PARTICULARLY URBAN HEAT AND CLIMATE CHANGE. THE LATTER CALLS FOR A BETTER REPRESENTATION OF TROPICAL AFRICAN CITIES' PROPERTIES RELEVANT FOR URBAN CLIMATE STUDIES. HERE, WE DEMONSTRATE THE POSSIBILITY OF COLLECTING URBAN CANOPY PARAMETERS DURING …		KATHOLIEKE UNIV LEUVEN, CELESTIJNENLAAN 200E, LEUVEN, BELGIUM.; UCL, LONDON, ENGLAND.; MAKERERE UNIV, KAMPALA, UGANDA.; RUHR UNIV BOCHUM, BOCHUM, GERMANY.; UNIV GHENT, GHENT, BELGIUM.; UNIV OKLAHOMA, NORMAN, OK 73019 USA.; VRIJE UNIV BRUSSEL, BRUSSELS, BELGIUM.; FLEMISH INST TECHNOL RES, MOL, BELGIUM.;	FIELDWORK; TROPICAL URBAN CLIMATE; LOCAL CLIMATE ZONES; URBAN CANOPY PARAMETERS; URBAN CLIMATE MODELLING	10.1007/s00704-021-03733-7	ARTICLE	KU LEUVEN [C14/17/053]; BELSPO (BELGIAN FEDERAL SCIENCE POLICY OFFICE) [SR/00/337]	THIS WORK WAS FINANCIALLY SUPPORTED BY THE KU LEUVEN INTERNAL SPECIAL RESEARCH FUND (BOF-C1 PROJECT C14/17/053) AND BELSPO (BELGIAN FEDERAL SCIENCE POLICY OFFICE) IN THE FRAME OF THE STEREO III PROGRAM, AS PART OF THE REACT (SR/00/337) PROJECT (HTTP://REACT.ULB.BE/).	RURAL-URBAN MIGRATION; SPECTRAL LIBRARY; ENERGY-BALANCE; MODEL; PERFORMANCE; MESOSCALE; SCHEME; KAMPALA; WUDAPT; IMPACT	THEOR. APPL. CLIMATOL.	ENGLISH			SPRINGER WIEN	2021	VAN DE WALLE, J (AUTOR CORRESPONDENTE), KATHOLIEKE UNIV LEUVEN, CELESTIJNENLAAN 200E, LEUVEN, BELGIUM.	0177-798X	THEORETICAL AND APPLIED CLIMATOLOGY	2	CAN LOCAL FIELDWORK HELP TO REPRESENT INTRAURBAN VARIABILITY OF CANOPY PARAMETERS RELEVANT FOR TROPICAL AFRICAN CLIMATE STUDIES	146	Kampala, Uganda	0.347596	32.5825	-	-
KABANO P;LINDLEY S;HARRIS A	KNOWLEDGE ABOUT THE IMPACTS OF URBAN HEAT ISLANDS (UHI) AND ASSOCIATED THERMAL GRADIENTS ON VEGETATION SEASONALITY (I.E. PHENOLOGY) IS VITAL FOR UNDERSTANDING SPATIAL PATTERNS IN VEGETATION ECOSYSTEM FUNCTIONS. HOWEVER, IN CONTRAST TO TEMPERATE CITES, THERE IS LITTLE EVIDENCE TO SHOW HOW UHI INFLUENCES LANDSCAPE PHENOLOGICAL PROCESSES IN THE TROPICS. IN THIS STUDY, WE EXAMINED VEGETATION PHENOLOG…	103989	UNIV MANCHESTER, SCH ENVIRONM EDUC & DEV, DEPT GEOG, OXFORD RD, MANCHESTER, LANCS, ENGLAND.; UNIV TWENTE, DEPT URBAN & REG PLANNING & GEOINFORMAT MANAGEMEN, FAC GEOINFORMAT SCI & EARTH OBSERVAT ITC, ENSCHEDE, NETHERLANDS.;	TROPICS; LOCAL CLIMATE ZONES; LANDSCAPE PHENOLOGY; LAND SURFACE TEMPERATURE; URBAN HEAT ISLAND	10.1016/j.landurbplan.2020.103989	ARTICLE	COMMONWEALTH SCHOLARSHIP COMMISSION; PRINCE ALBERT II OF MONACO THROUGH AN INTERGOVERNMENTAL PANEL FOR CLIMATE CHANGE SCHOLARSHIP AWARD	WE THANK THE MANUSCRIPT REVIEWERS FOR THEIR HELPFUL SUGGESTIONS. THIS RESEARCH WAS FUNDED BY THE COMMONWEALTH SCHOLARSHIP COMMISSION AND PRINCE ALBERT II OF MONACO THROUGH AN INTERGOVERNMENTAL PANEL FOR CLIMATE CHANGE SCHOLARSHIP AWARD.	LOCAL CLIMATE ZONES; GREEN INFRASTRUCTURE; ECOSYSTEM SERVICES; PHENOLOGY; TEMPERATURE; INTENSITY; CITIES; COVER	LANDSC. URBAN PLAN.	ENGLISH			ELSEVIER	2021	KABANO, P (AUTOR CORRESPONDENTE), UNIV MANCHESTER, SCH ENVIRONM EDUC & DEV, DEPT GEOG, OXFORD RD, MANCHESTER, LANCS, ENGLAND.; KABANO, P (AUTOR CORRESPONDENTE), UNIV TWENTE, DEPT URBAN & REG PLANNING & GEOINFORMAT MANAGEMEN, FAC GEOINFORMAT SCI & EARTH OBSERVAT ITC, ENSCHEDE, NETHERLANDS.	0169-2046	LANDSCAPE AND URBAN PLANNING	29	EVIDENCE OF URBAN HEAT ISLAND IMPACTS ON THE VEGETATION GROWING SEASON LENGTH IN A TROPICAL CITY	206	Kampala, Uganda	0.347596	32.5825	-	-
KABANO P;HARRIS A;LINDLEY S	CANOPY PHENOLOGY IS SENSITIVE TO VARIABILITY IN LOCAL ENVIRONMENTAL SETTINGS. IN TEMPERATE CLIMATES, URBAN PHENOLOGICAL PROCESSES AND THEIR DETERMINANTS ARE RELATIVELY WELL UNDERSTOOD. EQUIVALENT UNDERSTANDING OF PROCESSES IN TROPICAL URBAN SETTINGS IS, HOWEVER, LESS RESOLVED. IN THIS PAPER, WE EXPLORE THE INFLUENCE OF LOCAL URBAN ENVIRONMENTAL CHARACTERISTICS (THAT IS, DEGREE OF URBANIZATION, LA…		UNIV MANCHESTER, SCH ENVIRONM EDUC & DEV, DEPT GEOG, MANCHESTER, LANCS, ENGLAND.; UNIV TWENTE, DEPT URBAN & REG PLANNING & GEOINFORMAT MANAGEMEN, FAC GEOINFORMAT SCI & EARTH OBSERVAT ITC, ENSCHEDE, NETHERLANDS.;	TROPICS; DRY SEASON; LAND COVER; URBAN CLIMATE; UHI EFFECT; RELATIVE HUMIDITY; SOIL MOISTURE; VEGETATION; TREE CANOPY PHENOLOGY	10.1007/s10021-020-00571-y	ARTICLE	DIGITALGLOBE FOUNDATION; COMMONWEALTH SCHOLARSHIP COMMISSION; PRINCE ALBERT II OF MONACO THROUGH AN INTERGOVERNMENTAL PANEL FOR CLIMATE CHANGE SCHOLARSHIP	WE THANK KAMPALA CAPITAL CITY AUTHORITY (KCCA) FOR PERMISSION TO CARRY OUT THE STUDY. WE ALSO THANK DANIEL KANAMARA, GRACE NAMUGALU, EVELYNE BIRUNGI, HARRIET KYAKYO, DR. BERNARD BARASA FOR VALUABLE INSIGHT AND ASSISTANCE WITH THE LOGISTICS. THANKS TO DIGITALGLOBE FOUNDATION FOR PROVIDING AN IMAGE GRANT FOR FREE WORLDVIEW-3 IMAGERY OF KAMPALA, AND TO THE MANUSCRIPT REVIEWERS FOR THEIR HELPFUL SUGG…	LAND-SURFACE PHENOLOGY; HEAT-ISLAND; ECOSYSTEM SERVICES; GREEN INFRASTRUCTURE; VEGETATION PHENOLOGY; URBANIZATION; TREE; DECIDUOUSNESS; TEMPERATURE; SAVANNA	ECOSYSTEMS	ENGLISH			SPRINGER	2021	KABANO, P (AUTOR CORRESPONDENTE), UNIV MANCHESTER, SCH ENVIRONM EDUC & DEV, DEPT GEOG, MANCHESTER, LANCS, ENGLAND.; KABANO, P (AUTOR CORRESPONDENTE), UNIV TWENTE, DEPT URBAN & REG PLANNING & GEOINFORMAT MANAGEMEN, FAC GEOINFORMAT SCI & EARTH OBSERVAT ITC, ENSCHEDE, NETHERLANDS.	1432-9840	ECOSYSTEMS	2	SENSITIVITY OF CANOPY PHENOLOGY TO LOCAL URBAN ENVIRONMENTAL CHARACTERISTICS IN A TROPICAL CITY	24	Kampala, Uganda	0.347596	32.5825	-	-
ARULBALAJI P;PADMALAL D;MAYA K	RAPID URBANIZATION AND UNSCIENTIFIC DEVELOPMENTS HAVE RESULTED IN LARGE-SCALE DEGRADATION OF THE ENVIRONMENT AROUND MAJOR CITIES ALL OVER THE WORLD. THE PROBLEM IS ACUTE IN MANY TROPICAL AND SUB-TROPICAL URBAN LOCAL BODIES (ULBS) HAVING HIGH POPULATION DENSITY AND ARE UNDERGOING RAPID ECONOMIC DEVELOPMENTS. LACK OF ADEQUATE STUDIES TO CONTAIN THE ILL-EFFECTS OF DEVELOPMENTS IS MAJOR CHALLENGE BEF…	400	NATL CTR EARTH SCI STUDIES, THIRUVANANTHAPURAM 695011, KERALA, INDIA.;	LAND USE; LAND COVER CHANGES; CLIMATE CHANGE; URBAN HEAT ISLANDS; SOUTHWEST INDIA	10.1007/s12665-020-09120-1	ARTICLE			URBAN HEAT-ISLAND; DIFFERENCE WATER INDEX; USE/LAND COVER CHANGES; VEGETATION; LAKE; AREA; SPRAWL; CITIES; CITY; NDWI	ENVIRON. EARTH SCI.	ENGLISH			SPRINGER	2020	ARULBALAJI, P (AUTOR CORRESPONDENTE), NATL CTR EARTH SCI STUDIES, THIRUVANANTHAPURAM 695011, KERALA, INDIA.	1866-6280	ENVIRONMENTAL EARTH SCIENCES	7	IMPACT OF URBANIZATION AND LAND SURFACE TEMPERATURE CHANGES IN A COASTAL TOWN IN KERALA INDIA	79	Kerala, India	10.8505	76.2711	-	-
MORRIS K;CHAN A;MORRIS K;OOI M;OOZEER M;ABAKR Y;NADZIR M;MOHAMMED I	TROPICAL URBAN CLIMATOLOGY IS NOT WELL UNDERSTOOD. THIS STUDY AIMS TO PROVIDE INSIGHT ON THE INTERACTIONS OF URBANISATION AND THE URBAN CLIMATE. THE WEATHER RESEARCH AND FORECASTING (WRF) MODEL IS USED TO STUDY THE URBAN CLIMATE OF A TROPICAL CONURBATION - KLANG VALLEY, MALAYSIA. ANTHROPOGENIC HEAT AND LANDUSE LANDCOVER DATASETS OF THE VALLEY WERE PARAMETERISED TO IMPROVE MODEL'S PERFORMANCE AND …		UNIV NOTTINGHAM, FAC ENGN, MALAYSIA CAMPUS, SELANGOR, MALAYSIA.; PORT HARCOURT POLYTECH, CESIRI, PORT HARCOURT, RIVERS STATE, NIGERIA.; UNIV PUTRA, DEPT AGRIBUSINESS & BIORESOURCE ECON, SERDANG, SELANGOR, MALAYSIA.; ABDUS SALAAM INT CTR THEORET PHYS, CAMPUS STR COSTIERA 11, I-34151 TRIESTE, ITALY.; UNIV KEBANGSAAN MALAYSIA, FAC SCI & TECHNOL, SCH ENVIRONM & NAT RESOURCE SCI, BANGI, SELANGOR, MALA…		10.1016/j.uclim.2016.12.002	ARTICLE			HEAT-ISLAND; MODEL; CITY; PARAMETERIZATION; PUTRAJAYA; SIMULATIONS; TEMPERATURE; SENSITIVITY; CHINA; TIME	URBAN CLIM.	ENGLISH			ELSEVIER	2017	MORRIS, KI (AUTOR CORRESPONDENTE), UNIV NOTTINGHAM, FAC ENGN, MALAYSIA CAMPUS, SELANGOR, MALAYSIA.	2212-0955	URBAN CLIMATE	16	URBANISATION AND URBAN CLIMATE OF A TROPICAL CONURBATION KLANG VALLEY MALAYSIA	19	Klang Valley, Malaysia	3.15619	101.802	-	-
CHATTERJEE S;KHAN A;DINDA A;MITHUN S;KHATUN R;AKBARI H;KUSAKA H;MITRA C;BHATTI S;DOAN Q;WANG Y	TROPICAL CITIES ARE MORE SUSCEPTIBLE TO THE SUGGESTED FALL OUTS FROM PROJECTED GLOBAL WARMING SCENARIOS AS THEY ARE LOCATED IN THE TORRID ZONE AND GROWING AT RAPID RATES. THEREFORE, RESEARCH ON THE MITIGATION OF URBAN HEAT ISLAND (UHI) EFFECTS IN TROPICAL CITIES HAS ATTAINED MUCH SIGNIFICANCE AND INCREASED IMMENSELY OVER RECENT YEARS. THE UHI MITIGATION STRATEGIES COMMONLY USED FOR TEMPERATE CITI…		PRESIDENCY UNIV, DEPT GEOG, KOLKATA, INDIA.; LALBABA COLL, DEPT GEOG, HOWRAH, INDIA.; VIDYASAGAR UNIV, DEPT GEOG & ENVIRONM MANAGEMENT, MIDNAPORE, INDIA.; HALDIA GOVT COLL, DEPT GEOG, HALDIA, INDIA.; JADAVPUR UNIV, SCH OCEANOG STUDIES, KOLKATA, INDIA.; CONCORDIA UNIV, HEAT ISL GRP, BLDG CIVIL & ENVIRONM ENGN, MONTREAL, PQ, CANADA.; UNIV TSUKUBA, CTR COMPUTAT SCI, TSUKUBA, IBARAKI, JAPAN.; AUBURN …	URBAN MICRO-CLIMATE; UHI MITIGATION STRATEGIES; ENVI-MET V 4.0; COOL CITY MODEL; PHYSIOLOGICALLY EQUIVALENT TEMPERATURE (PET)	10.1016/j.scitotenv.2019.01.299	ARTICLE	FACULTY RESEARCH AND PERSONAL DEVELOPMENT FUND, PRESIDENCY UNIVERSITY	WE APPRECIATE INSIGHTFUL SUGGESTIONS RECEIVED FROM IAIN DOUGLAS STEWART, GLOBAL CITIES INSTITUTE, UNIVERSITY OF TORONTO, CANADA IN IMPROVING THE SCIENTIFIC QUALITY OF THE ARTICLE. WE GREATLY APPRECIATE THE TREMENDOUS SUPPORT RECEIVED FROM THE EDITORIAL BOARD OF THE SCIENCE OF THE TOTAL ENVIRONMENT (STOTEN) ESPECIALLY FROM JOSE VIRGILIO MATOS FIGUEIRA CRUZ, ASSOCIATE EDITOR, IN COURSE OF THE REVIE…	LAND-SURFACE TEMPERATURE; COOL PAVEMENT MATERIAL; SYNOPTIC CONDITIONS; ENERGY SAVINGS; TROPICAL CITY; SENSED DATA; HUMID CITY; ENVI-MET; COMFORT; CLIMATE	SCI. TOTAL ENVIRON.	ENGLISH	30731408		ELSEVIER	2019	KHAN, A (AUTOR CORRESPONDENTE), LALBABA COLL, DEPT GEOG, HOWRAH, INDIA.	0048-9697	SCIENCE OF THE TOTAL ENVIRONMENT	42	SIMULATING MICROSCALE THERMAL INTERACTIONS IN DIFFERENT BUILDING ENVIRONMENTS FOR MITIGATING URBAN HEAT ISLANDS	663	Kolkata, India	22.5726	88.3639	-	-
KORANTENG C;SIMONS B;NYAME-TAWIAH D	APART FROM THE EVER-INCREASING POPULATION OF MOST TROPICAL URBAN CITIES, HIGH AMBIENT TEMPERATURE, DETERIORATED COMFORT CONDITIONS, HIGHLY POLLUTED ENVIRONMENTS ARE BUT A FEW OF THE PROBLEMS THESE CITIES ARE CONFRONTED WITH. IN THE LONG RUN, INCREASE ENERGY DEMANDS BOTH FOR PRODUCTION AND THE PROVISION OF COMFORTABLE SPACES BECOMES NECESSARY EVEN THOUGH IT'S A VERY SCARCE RESOURCE. IT IS WIDELY K…		UNIV CIENCIA & TECNOL KWAME NKRUMAH, KUMASI, GHANA.;	URBAN HEAT ISLAND; THERMAL COMFORT; KUMASI; URBANIZATION; CLIMATE CHANGE	10.23925/2179-3565.2021v12i1p45-56	ARTICLE			URBAN HEAT-ISLAND; ENERGY PERFORMANCE; MITIGATION; BENEFITS; COMFORT; IMPACT; SPACES; CITY; MORTALITY	RISUS	ENGLISH			PONTIFICIA UNIV CATOLICA SAO PAULO-PUC-SP	2021	KORANTENG, C (AUTOR CORRESPONDENTE), UNIV CIENCIA & TECNOL KWAME NKRUMAH, KUMASI, GHANA.	2179-3565	RISUS-JOURNAL ON INNOVATION AND SUSTAINABILITY	0	SIMULATIONBASED ANALYSIS OF THE EFFECT OF GREEN ROOFS ON THERMAL PERFORMANCE OF BUILDINGS IN A TROPICAL LANDSCAPE	12	Kumasi, Ghana	6.69507	-1.6158	-	-
RAMSAY E;FLEMING G;FABER P;BARKER S;SWEENEY R;TARUC R;CHOWN S;DUFFY G	THE HEALTH AND ECONOMIC IMPACTS OF EXTREME HEAT ON HUMANS ARE ESPECIALLY PRONOUNCED IN POPULATIONS WITHOUT THE MEANS TO ADAPT. WE DEPLOYED A SENSOR NETWORK ACROSS 12 INFORMAL SETTLEMENTS IN MAKASSAR, INDONESIA TO MEASURE THE THERMAL ENVIRONMENT THAT PEOPLE EXPERIENCE INSIDE AND OUTSIDE THEIR HOMES. WE CALCULATED TWO METRICS TO ASSESS THE MAGNITUDE AND FREQUENCY OF HEAT STRESS CONDITIONS, WET BULB…	103248	MONASH UNIV, SCH BIOL SCI, CLAYTON, VIC 3800, AUSTRALIA.; MONASH UNIV, SCH PUBL HLTH & PREVENT MED, CLAYTON, VIC 3004, AUSTRALIA.; MONASH UNIV, CTR HLTH ECON, MONASH BUSINESS SCH, CLAYTON, VIC 3145, AUSTRALIA.; HASANUDDIN UNIV, PUBL HLTH FAC, MAKASSAR, INDONESIA.;		10.1016/j.isci.2021.103248	ARTICLE	WELLCOME TRUST [OUR PLANET, OUR HEALTH] [205222/Z/16/Z]; AUSTRALIAN GOVERNMENT RESEARCH TRAINING PROGRAM SCHOLARSHIP; AUSTRALIAN RESEARCH COUNCIL DISCOVERY EARLY CAREER RESEARCHER AWARD - AUSTRALIAN GOVERNMENT [DE190100003]; AUSTRALIAN RESEARCH COUNCIL DISCOVERY EARLY CAREER RESEARCHER AWARD [DE210101568]	THIS RESEARCH WAS SUPPORTED BY THE WELLCOME TRUST [OUR PLANET, OUR HEALTH GRANT 205222/Z/16/Z]. RESEARCH WAS CONDUCTED WITH PERMISSION FROM THE INDONESIAN MINISTRY OF RESEARCH AND TECHNOLOGY [RESEARCH PERMITS 360/E5/E5.4/SIP/2019, 8/SIP/FRP/E5/DIT.KI/I/1/2019, 7/SIP/FRP/E5/DIT.KI/I/1/2019, 84/E5/E5.4/SIP.EXT/2019]. E.E.R IS SUPPORTED BY AN AUSTRALIAN GOVERNMENT RESEARCH TRAINING PROGRAM SCHOLARSH…	THERMAL COMFORT; CLIMATE-CHANGE; TEMPERATURE; HEALTH	ISCIENCE	ENGLISH	34849460		CELL PRESS	2021	RAMSAY, EE (AUTOR CORRESPONDENTE), MONASH UNIV, SCH BIOL SCI, CLAYTON, VIC 3800, AUSTRALIA.		ISCIENCE	6	CHRONIC HEAT STRESS IN TROPICAL URBAN INFORMAL SETTLEMENTS	24	Makassar, Indonesia	-5.14766	119.433	-	-
REYNOLDS C;ESCOBEDO F;CLERICI N;ZEA-CAMANO J	CITIES THROUGHOUT THE WORLD ARE ADVOCATING HIGHLY PROMOTED TREE PLANTINGS AS A CLIMATE CHANGE MITIGATION MEASURE. ASSESSING THE CARBON OFFSETS ASSOCIATED WITH URBAN TREES RELATIVE TO OTHER CLIMATE CHANGE POLICIES IS VITAL FOR SUSTAINABLE DEVELOPMENT, PLANNING, AND SOLVING ENVIRONMENTAL AND SOCIO-ECONOMIC PROBLEMS, BUT IS DIFFICULT IN DEVELOPING COUNTRIES. WE ESTIMATED AND ASSESSED CARBON DIOXIDE …	785	DUKE UNIV, NICHOLAS SCH ENVIRONM, ENVIRONM HALL,9 CIRCUIT DR, DURHAM, NC 27708 USA.; UNIV ROSARIO, FAC CIENCIAS NAT & MATEMAT, PROGRAMA BIOL, CR 24 63C-69, BOGOTA, COLOMBIA.; UNIV FED PARANA, PROGRAMA POS GRAD ENGN FLORESTAL, AV PREF LOTHARIO MEISSNER 632, BR-80210170 CURITIBA, PARANA, BRAZIL.;	CLIMATE CHANGE MITIGATION; NATURE-BASED SOLUTIONS; URBAN FOREST; CARBON OFFSETS; CLEAN DEVELOPMENT MECHANISM; STREET TREES; ECOSYSTEM SERVICES	10.3390/su9050785	ARTICLE			CLIMATE-CHANGE MITIGATION; SUBTROPICAL URBAN FOREST; STORAGE; SEQUESTRATION; GROWTH; REFORESTATION; DYNAMICS; BIOMASS; STOCKS; AREAS	SUSTAINABILITY	ENGLISH			MDPI	2017	CLERICI, N (AUTOR CORRESPONDENTE), UNIV ROSARIO, FAC CIENCIAS NAT & MATEMAT, PROGRAMA BIOL, CR 24 63C-69, BOGOTA, COLOMBIA.		SUSTAINABILITY	18	DOES GREENING OF NEOTROPICAL CITIES CONSIDERABLY MITIGATE CARBON DIOXIDE EMISSIONS THE CASE OF MEDELLIN COLOMBIA	9	Medellin, Colombia	6.2442	-75.5812	-	-
PATHIRANA A;DENEKEW H;VEERBEEK W;ZEVENBERGEN C;BANDA A	MORE THAN HALF OF THE HUMANITY LIVES IN CITIES AND MANY CITIES ARE GROWING IN SIZE AT A PHENOMENAL RATE. URBANISATION-DRIVEN LANDUSE CHANGE INFLUENCES THE LOCAL HYDROMETEOROLOGICAL PROCESSES, CHANGES THE URBAN MICRO-CLIMATE AND SOMETIMES AFFECTS THE PRECIPITATION SIGNIFICANTLY. UNDERSTANDING THE FEEDBACK OF URBANISATION DRIVEN MICRO-CLIMATIC CHANGES ON THE RAINFALL PROCESS IS A TIMELY CHALLENGE. …		UNESCO-IHE INSTITUTE FOR WATER EDUCATION, WESTVEST 7, DELFT 2611AX, NETHERLANDS; DEPARTMENT OF HYDRAULIC ENGINEERING, FACULTY OF CIVIL ENGINEERING AND GEOSCIENCES, DELFT UNIVERSITY OF TECHNOLOGY, STEWINWEG 1, DELFT 2628CN, NETHERLANDS	ATMOSPHERIC MODEL; HYDROMETEOROLOGY; LANDUSE CHANGE; URBAN GROWTH; URBAN HEAT ISLAND; URBANISATION	10.1016/j.atmosres.2013.10.005	ARTICLE		NA NA NA	ATMOSPHERIC MODEL; HYDROMETEOROLOGY; LAND-USE CHANGE; URBAN HEAT ISLAND; URBANISATION; RAIN; URBAN GROWTH; CLIMATE CHANGE; ATMOSPHERIC MODELING; CLIMATE CHANGE; EXTREME EVENT; HEAT ISLAND; HYDROMETEOROLOGY; LAND USE CHANGE; MICROCLIMATE; PRECIPITATION (CLIMATOLOGY); RAINFALL; SENSITIVITY ANALYSIS; URBAN GROWTH; URBANIZATION; INDIA; MAHARASHTRA; MUMBAI	ATMOS. RES.	ENGLISH				2014	PATHIRANA, A.; UNESCO-IHE INSTITUTE FOR WATER EDUCATION, WESTVEST 7, DELFT 2611AX, NETHERLANDS; EMAIL: ASSELA@PATHIRANA.NET	01698095	ATMOSPHERIC RESEARCH	110	IMPACT OF URBAN GROWTHDRIVEN LANDUSE CHANGE ON MICROCLIMATE AND EXTREME PRECIPITATION A SENSITIVITY STUDY	138	Mumbai, India	19.076	72.8777	-	-
BENRAZAVI R;DOLA K;UJANG N;BENRAZAVI N	LOSS OF NATURAL HABITAT AND INCREASED USE OF MAN-MADE MATERIALS HAVE LED TO HIGHER TEMPERATURES IN TROPICAL URBAN LANDSCAPE. ONE WAY TO HANDLE THIS ISSUE IS BY USING PAVING MATERIALS THAT ABSORB LESS AMOUNT OF HEAT AND PROVIDE LOWER SURFACE TEMPERATURES. THIS PAPER IDENTIFIES SEVERAL PAVEMENT MATERIALS WITH LOW SURFACE TEMPERATURES FOR POTENTIAL USE IN A TROPICAL CLIMATE. THE STUDY WAS CONDUCTED …		UNIV PUTRA MALAYSIA, FAC DESIGN & ARCHITECTURE, SERDANG 43400, SELANGOR, MALAYSIA.; ISLAMIC AZAD UNIV, SCH ARCHITECTURE & URBAN ART, KERMAN 7635131167, IRAN.;	SUSTAINABLE CITY; URBAN HEAT ISLAND; PAVEMENT MATERIALS; CLIMATE CHANGE; LAND SURFACE TEMPERATURE	10.1016/j.scs.2016.01.011	ARTICLE			URBAN HEAT-ISLAND; THERMAL COMFORT; POROUS FINS; MITIGATION; PERFORMANCE; SIMULATION; COATINGS; EXCHANGE; CLIMATE; CITY	SUST. CITIES SOC.	ENGLISH			ELSEVIER	2016	BENRAZAVI, RS (AUTOR CORRESPONDENTE), UNIV PUTRA MALAYSIA, FAC DESIGN & ARCHITECTURE, SERDANG 43400, SELANGOR, MALAYSIA.	2210-6707	SUSTAINABLE CITIES AND SOCIETY	24	EFFECT OF PAVEMENT MATERIALS ON SURFACE TEMPERATURES IN TROPICAL ENVIRONMENT	22	Putrajaya, Malaysia	2.94314	101.719	-	-
BISWAS R;SHARMA R;GYASI-AGYEI Y	ADVANCING KNOWLEDGE ON HOW CLIMATE CHANGE IMPACTS ON WATER RESOURCES IS CONSIDERED A PRIORITY IN THE ACADEMIC WORLD. THIS PAPER STUDIES THE STRATEGIES ADOPTED BY URBAN WATER PROFESSIONALS IN THE TROPICAL REGION OF QUEENSLAND, AUSTRALIA TO MINIMISE THE IMPACTS OF CLIMATE CHANGE ON THE REGIONAL URBAN WATER SUPPLY NETWORK. IN THE RECENT PAST, THE DRY TROPICAL URBAN REGION OF QUEENSLAND HAS FACED A C…	131643	CENT QUEENSLAND UNIV, SCH ENGN & TECHNOL, TOWNSVILLE, QLD, AUSTRALIA.; CENT QUEENSLAND UNIV, SCH ENGN & TECHNOL, MELBOURNE, VIC, AUSTRALIA.; GRIFFITH UNIV, SCH ENGN & BUILT ENVIRONM, NATHAN, QLD, AUSTRALIA.;	CLIMATE CHANGE; ADAPTATION; WATER AUTHORITY; URBAN WATER; WATER SECURITY	10.1016/j.jclepro.2022.131643	ARTICLE	DEPARTMENT OF EDUCATION, SKILLS AND EMPLOYMENT, AUSTRALIA	THIS RESEARCH WORK WAS SUPPORTED BY THE RESEARCH TRAINING PROGRAM (RTP) TUITION FEE SCHOLARSHIP FUNDING PROVIDED BY THE DEPARTMENT OF EDUCATION, SKILLS AND EMPLOYMENT, AUSTRALIA. WE ARE GRATEFUL TO THE WATER PROFESSIONALS WHO PARTICIPATED IN THE INTERVIEWS THAT YIELDED VALUABLE INFORMATION. VALUABLE AND CONSTRUCTIVE COMMENTS BY THE THREE ANONYMOUS REVIEWERS ARE GREATLY ACKNOWLEDGED.	SEA-LEVEL RISE; RESOURCES MANAGEMENT; LOCAL-GOVERNMENT; CHANGE IMPACTS; RIVER-BASIN; BARRIERS; TEMPERATURE; STRATEGIES; AUSTRALIA; FRAMEWORK	J. CLEAN PROD.	ENGLISH			ELSEVIER SCI LTD	2022	BISWAS, RR (AUTOR CORRESPONDENTE), CENT QUEENSLAND UNIV, SCH ENGN & TECHNOL, TOWNSVILLE, QLD, AUSTRALIA.	0959-6526	JOURNAL OF CLEANER PRODUCTION	0	ADAPTATION TO CLIMATE CHANGE A STUDY ON REGIONAL URBAN WATER MANAGEMENT AND PLANNING PRACTICE	355	Queensland, Australia	-20.9176	142.703	-	-
MENDEZ-LAZARO P;PEREZ-CARDONA C;RODRIGUEZ E;MARTINEZ O;TABOAS M;BOCANEGRA A;MENDEZ-TEJEDA R	EXTREME HEAT EPISODES ARE BECOMING MORE COMMON WORLDWIDE, INCLUDING IN TROPICAL AREAS OF AUSTRALIA, INDIA, AND PUERTO RICO. HIGHER FREQUENCY, DURATION, AND INTENSITY OF EXTREME HEAT EPISODES ARE TRIGGERING PUBLIC HEALTH ISSUES IN MOST MID-LATITUDE AND CONTINENTAL CITIES. WITH URBANIZATION, LAND USE AND LAND COVER HAVE AFFECTED LOCAL CLIMATE DIRECTLY AND INDIRECTLY ENCOURAGING THE URBAN HEAT ISLAN…		UNIV PUERTO RICO, GRAD SCH PUBL HLTH, ENVIRONM HLTH DEPT, MED SCI CAMPUS,POB 365067, SAN JUAN, PR 00936 USA.; UNIV PUERTO RICO, GRAD SCH PUBL HLTH, DEPT BIOSTAT & EPIDEMIOL, MED SCI CAMPUS,POB 365067, SAN JUAN, PR 00936 USA.; NATL WEATHER SERV SAN JUAN, PR WEATHER FORECAST OFF, 4000 CARRETERA 190, CAROLINA, PR 00979 USA.; UNIV PUERTO RICO, LAB ATMOSPHER SCI, CAROLINA CAMPUS,POB 4800, CAROLINA, PR…	CLIMATE CHANGE; EXTREME WEATHER EVENTS; HEAT EPISODES; MORTALITY; PUERTO RICO	10.1007/s00484-016-1291-z	ARTICLE; PROCEEDINGS PAPER	NATIONAL SCIENCE FOUNDATION [AGS-1444755]	THIS RESEARCH WAS PARTLY SUPPORTED BY THE NATIONAL SCIENCE FOUNDATION (GRANT NO. NSF NO. AGS-1444755) PROJECT TITLE URBAN RESILIENCE TO EXTREMES SUSTAINABILITY RESEARCH NETWORK (UREX-SRN).	AMBIENT-TEMPERATURE; HOSPITAL ADMISSIONS; IMPACT	INT. J. BIOMETEOROL.	ENGLISH	27981339		SPRINGER	2018	MENDEZ-LAZARO, PA (AUTOR CORRESPONDENTE), UNIV PUERTO RICO, GRAD SCH PUBL HLTH, ENVIRONM HLTH DEPT, MED SCI CAMPUS,POB 365067, SAN JUAN, PR 00936 USA.	0020-7128	INTERNATIONAL JOURNAL OF BIOMETEOROLOGY	33	CLIMATE CHANGE HEAT AND MORTALITY IN THE TROPICAL URBAN AREA OF SAN JUAN PUERTO RICO	62	San Juan and Bayamón, Puerto Rico	18.4655	-66.1057	18.3988	-66.1582
YULIA Y;ARLIANDA R	CITIES AROUND THE WORLD ARE FACING TREMENDOUS CHALLENGES DUE TO CLIMATE CHANGE. TROPICAL CITIES ARE SIGNIFICANTLY IMPACTED BY TEMPERATURE INCREASES, HIGHER THAN AVERAGE GLOBAL RISING SEA LEVELS, AND EXTREME WEATHER EVENTS. IN THE TROPICAL ASIA-­PACIFIC REGION EFFECTS FROM THE EL NIÑO-­SOUTHERN OSCILLATION ARE ESPECIALLY SEVERE, WHICH, IN TURN, CAUSE DISASTERS SUCH AS FLOODS AND DROUGHTS. CLIMATE …		URBAN PLANNER AND DESIGNER, INDEPENDENT SCHOLAR, INDONESIA; ARCHITECT, INDEPENDENT SCHOLAR, INDONESIA	100 RESILIENT CITIES; CLIMATE CHANGE; CLIMATE RESILIENCE; POLICY TRANSFER; TROPICAL CITIES; URBANISATION; WATER AS LEVERAGE	10.25120/ETROPIC.19.2.2020.3767	ARTICLE		NA NA NA		ETROPIC	ENGLISH		2	JAMES COOK UNIVERSITY	2020		14482940	ETROPIC	1	CLIMATE RESILIENCE AND POLICY TRANSFER IN SEMARANG CITY INDONESIA	19	Semarang, Indonesia	-7.00514	110.438	-	-
ROTH M;CHOW W	THIS HISTORICAL REVIEW OF 20 STUDIES SINCE THE 1960S EXAMINES THE INFLUENCE OF URBAN DEVELOPMENT ON THE THERMAL ENVIRONMENT IN SINGAPORE, A FAST GROWING TROPICAL ISLAND CITY-STATE. PAST OBSERVATIONS ARE CRITICALLY ASSESSED WITH REGARD TO EXPERIMENTAL CONTROLS AND STATION METADATA. GIVEN THE AVAILABILITY OF HISTORICAL CLIMATE AND DEVELOPMENTAL DATA SPANNING ALMOST 50 YEARS, CHANGES IN URBAN HEAT I…		DEPARTMENT OF GEOGRAPHY, NATIONAL UNIVERSITY OF SINGAPORE, SINGAPORE, SINGAPORE; DEPARTMENT OF ENGINEERING, ARIZONA STATE UNIVERSITY, MESA, AZ, UNITED STATES	CLIMATE CHANGE; SINGAPORE; TROPICAL; URBAN HEAT ISLAND; URBANIZATION	10.1111/sjtg.12003	ARTICLE		NA NA NA	HEAT ISLAND; HISTORICAL PERSPECTIVE; NOCTURNAL BOUNDARY LAYER; OBSERVATIONAL METHOD; RAINFOREST; RESEARCH WORK; SATELLITE IMAGERY; SECONDARY FOREST; SURFACE TEMPERATURE; URBAN CLIMATE; URBAN DEVELOPMENT; URBANIZATION; SINGAPORE [SINGAPORE (NTN)]; SINGAPORE [SOUTHEAST ASIA]	SINGAP. J. TROP. GEOGR.	ENGLISH		3		2012	ROTH, M.; DEPARTMENT OF GEOGRAPHY, , SINGAPORE, SINGAPORE; EMAIL: GEOMR@NUS.EDU.SG	01297619	SINGAPORE JOURNAL OF TROPICAL GEOGRAPHY	78	A HISTORICAL REVIEW AND ASSESSMENT OF URBAN HEAT ISLAND RESEARCH IN SINGAPORE	33	Singapore	1.35208	103.82	-	-
LI X;WANG X;BABOVIC V	CHANGES IN PRECIPITATION EXTREMES IN THE TROPICAL URBAN CONTEXT IS COMPLEX, WHERE THE PRECIPITATION ACTIVITIES ARE INFLUENCED BY THE COMBINED EFFECTS OF EL NINO-SOUTHERN OSCILLATION (ENSO), GLOBAL WARMING AND LOCAL EFFECTS. THIS STUDY PRESENTS A COMPREHENSIVE FRAMEWORK TO INVESTIGATE THE VARIABILITY AND TRENDS IN PRECIPITATION EXTREMES IN A TROPICAL URBAN CITY-STATE, SINGAPORE, BASED ON A SET OF …		NATL UNIV SINGAPORE, DEPT CIVIL & ENVIRONM ENGN, BLOCK E1A,07-03,1 ENGN DR 2, SINGAPORE 117576, SINGAPORE.; DHI WATER & ENVIRONM S PTE LTD, DEPT MODELLING & HYDROINFORMAT SERV, 1 CLEANTECH LOOP,03-05 CLEANTECH ONE, SINGAPORE, SINGAPORE.;	TROPICAL URBAN ENVIRONMENTS; PRECIPITATION EXTREME; TREND ANALYSIS; CLIMATE CHANGE	10.1002/joc.5165	ARTICLE			TEMPERATURE; RAINFALL; INDEXES; FREQUENCY; INTENSITY; REGIMES; TESTS; ENSO	INT. J. CLIMATOL.	ENGLISH			WILEY	2018	BABOVIC, V (AUTOR CORRESPONDENTE), NATL UNIV SINGAPORE, DEPT CIVIL & ENVIRONM ENGN, BLOCK E1A,07-03,1 ENGN DR 2, SINGAPORE 117576, SINGAPORE.; WANG, X (AUTOR CORRESPONDENTE), DHI WATER & ENVIRONM S PTE LTD, DEPT MODELLING & HYDROINFORMAT SERV, 1 CLEANTECH LOOP,03-05 CLEANTECH ONE, SINGAPORE, SINGAPORE.	0899-8418	INTERNATIONAL JOURNAL OF CLIMATOLOGY	60	ANALYSIS OF VARIABILITY AND TRENDS OF PRECIPITATION EXTREMES IN SINGAPORE DURING 19802013	38	Singapore	1.35208	103.82	-	-
LI X;MESHGI A;BABOVIC V	CLIMATOLOGY AND STATISTICAL VARIABILITY OF WET AND DRY SPELL CHARACTERISTICS OF PRECIPITATION PROVIDE AN EFFECTIVE TOOL TO UNDERSTAND THE IMPACTS OF NATURAL CLIMATE VARIABILITY SUCH AS EL NINO/SOUTHERN OSCILLATION (ENSO) AND CLIMATE CHANGE ON THE WATER AVAILABILITY OVER A REGION. HOWEVER, TO DATE, DETAILED STUDIES ABOUT PRECIPITATION SPELL CHARACTERISTICS IN THE TROPICAL URBAN CONTEXT ARE STILL L…		NATL UNIV SINGAPORE, DEPT CIVIL & ENVIRONM ENGN, BLOCK E1A,07-03,1 ENGN DR 2, SINGAPORE, SINGAPORE.; SINGAPORES NATL WATER AGCY, PUBL UTIL BOARD PUB, 40 SCOTTS RD,ENVIRONM BLDG, SINGAPORE, SINGAPORE.;	TROPICAL URBAN ENVIRONMENTS; PRECIPITATION; WET AND DRY SPELL; TREND ANALYSIS; EL NINO/SOUTHERN OSCILLATION	10.1002/joc.4672	ARTICLE			SOUTH-EAST ASIA; RAINFALL VARIABILITY; SPATIAL VARIABILITY; RIVER BASIN; TRENDS; EXTREMES; CHINA; MONSOON; INDIA	INT. J. CLIMATOL.	ENGLISH			WILEY	2016	LI, X (AUTOR CORRESPONDENTE), NATL UNIV SINGAPORE, DEPT CIVIL & ENVIRONM ENGN, BLOCK E1A,07-03,1 ENGN DR 2, SINGAPORE, SINGAPORE.	0899-8418	INTERNATIONAL JOURNAL OF CLIMATOLOGY	42	SPATIOTEMPORAL VARIATION OF WET AND DRY SPELL CHARACTERISTICS OF TROPICAL PRECIPITATION IN SINGAPORE AND ITS ASSOCIATION WITH ENSO	36	Singapore	1.35208	103.82	-	-
CHEW L;LIU X;LI X;NORFORD L	HEAT WAVES ARE UNUSUALLY HIGH TEMPERATURE EVENTS OVER CONSECUTIVE DAYS AND MAY CAUSE ADVERSE IMPACTS SUCH AS MORBIDITY AND MORTALITY. THE INTERACTION BETWEEN HEAT WAVES AND URBAN HEAT ISLAND (UHI) EFFECTS HAS REMAINED A SUBJECT OF DEBATE, AS SOME STUDIES PROVE HEAT WAVE-UHI SYNERGY WHILE OTHERS DO NOT. FURTHERMORE, HEAT WAVES AFFECT TROPICAL CITIES MORE SEVERELY THAN MID-LATITUDE CITIES, BUT THER…	105134	SINGAPORE MIT ALLIANCE RES & TECHNOL, CTR ENVIRONM SENSING & MODELING, SINGAPORE, SINGAPORE.; AGCY SCI TECHNOL & RES, INST HIGH PERFORMANCE COMP, SINGAPORE, SINGAPORE.; SUN YAT SEN UNIV, SCH ATMOSPHER SCI, GUANGZHOU, PEOPLES R CHINA.; SOUTHERN MARINE SCI & ENGN GUANGDONG LAB ZHUHAI, GUANGZHOU, PEOPLES R CHINA.; SUN YAT SEN UNIV, GUANGDONG PROV KEY LAB CLIMATE CHANGE & NAT DISAS, GUANGZHOU, PEOPLE…	HEAT WAVE-UHI SYNERGY; GROUND OBSERVATIONS; WRF; TROPICS; EXTREME TEMPERATURE	10.1016/j.atmosres.2020.105134	ARTICLE	NATIONAL RESEARCH FOUNDATION SINGAPORE (NRF) UNDER ITS CAMPUS FOR RESEARCH EXCELLENCE AND TECHNOLOGICAL ENTERPRISE (CREATE) PROGRAM; INTRA-CREATE COLLABORATIVE PROJECT "COOLING SINGAPORE"	THIS WORK IS SUPPORTED BY THE NATIONAL RESEARCH FOUNDATION SINGAPORE (NRF) UNDER ITS CAMPUS FOR RESEARCH EXCELLENCE AND TECHNOLOGICAL ENTERPRISE (CREATE) PROGRAM AND INTRA-CREATE COLLABORATIVE PROJECT "COOLING SINGAPORE." THE CENTER FOR ENVIRONMENTAL SENSING AND MODELING (CENSAM) IS AN INTERDISCIPLINARY RESEARCH GROUP OF THE SINGAPORE-MIT ALLIANCE FOR RESEARCH AND TECHNOLOGY (SMART). WE THANK DR.…	LOCAL CLIMATE; SOIL-MOISTURE; CANOPY MODEL; IMPACT; ENERGY; PATTERNS; FLUXES	ATMOS. RES.	ENGLISH			ELSEVIER SCIENCE INC	2021	LI, XX (AUTOR CORRESPONDENTE), SUN YAT SEN UNIV, SCH ATMOSPHER SCI, GUANGZHOU, PEOPLES R CHINA.	0169-8095	ATMOSPHERIC RESEARCH	25	INTERACTION BETWEEN HEAT WAVE AND URBAN HEAT ISLAND A CASE STUDY IN A TROPICAL COASTAL CITY SINGAPORE	247	Singapore	1.35208	103.82	-	-
LU Y;QIN X	SYSTEMATIC DOWNSCALING-DISAGGREGATION STUDY WAS CONDUCTED OVER SINGAPORE ISLAND, WITH AN AIM TO GENERATE HIGH SPATIAL AND TEMPORAL RESOLUTION RAINFALL DATA UNDER FUTURE CLIMATE-CHANGE CONDITIONS. THE STUDY CONSISTED OF TWO MAJOR COMPONENTS. THE FIRST PART WAS TO PERFORM AN INTER-COMPARISON OF VARIOUS ALTERNATIVES OF DOWNSCALING AND DISAGGREGATION METHODS BASED ON OBSERVED DATA. THIS INCLUDED (I) …		NANYANG TECHNOL UNIV, SCH CIVIL & ENVIRONM ENGN, SINGAPORE 639798, SINGAPORE.; NANYANG TECHNOL UNIV, EARTH OBSERV SINGAPORE, SINGAPORE 639798, SINGAPORE.;	DOWNSCALING; DISAGGREGATION; GLM; KNN; HYETOS; MUDRAIN	10.1016/j.jhydrol.2013.11.027	ARTICLE	EARTH OBSERVATORY OF SINGAPORE (EOS) PROJECT [M4080707.B50, M4080891.B50, M4430053.B50]; SINGAPORE'S MINISTRY OF EDUCATION (MOM) ACRF TIER 1 PROJECT [M4010973.030]	THIS RESEARCH WAS SUPPORTED BY EARTH OBSERVATORY OF SINGAPORE (EOS) PROJECT (M4080707.B50, M4080891.B50, AND M4430053.B50) AND SINGAPORE'S MINISTRY OF EDUCATION (MOM) ACRF TIER 1 PROJECT (M4010973.030). THE AUTHORS ARE THANKFUL FOR THE DATA SUPPORT FROM NATIONAL ENVIRONMENT AGENCY (NEA) OF SINGAPORE. THE AUTHORS ALSO MUCH APPRECIATE THE REVIEWERS AND THE EDITOR FOR HIS/HER INSIGHTFUL AND VALUABLE…	CLIMATE-CHANGE SCENARIOS; UNCERTAINTY ANALYSIS; MODEL; PRECIPITATION; GENERATION; IMPACTS; TOOL	J. HYDROL.	ENGLISH			ELSEVIER SCIENCE BV	2014	QIN, XS (AUTOR CORRESPONDENTE), NANYANG TECHNOL UNIV, SCH CIVIL & ENVIRONM ENGN, SINGAPORE 639798, SINGAPORE.	0022-1694	JOURNAL OF HYDROLOGY	20	MULTISITE RAINFALL DOWNSCALING AND DISAGGREGATION IN A TROPICAL URBAN AREA	509	Singapore	1.35208	103.82	-	-
DISSEGNA M;YIN T;WEI S;RICHARDS D;GRET-REGAMEY A	INCREASED URBANIZATION AND CLIMATE CHANGE HAVE RESULTED IN THE INTENSIFICATION OF THE URBAN HEAT ISLAND (UHI) EFFECT, PARTICULARLY IN TROPICAL CITIES. ONE OF THE MAIN CAUSES OF UHI IS THE MAN-MADE URBAN SURFACES INFLUENCING THE RADIATION BUDGET BY ABSORBING, REFLECTING, AND EMITTING RADIATION AT VARIOUS WAVELENGTHS. THE RADIATIVE BUDGET OF A CITY IS DIRECTLY INFLUENCED BY THE URBAN GEOMETRY, SURF…	700	SINGAPORE ETH CTR, FUTURE CITIES LAB, 1 CREATE WAY, SINGAPORE 138602, SINGAPORE.; UNIV MARYLAND, EARTH SYST SCI INTERDISCIPLINARY CTR, COLLEGE PK, MD 20740 USA.; SINGAPORE MIT ALLIANCE RES & TECHNOL, SINGAPORE 138602, SINGAPORE.; SWISS FED INST TECHNOL, CHAIR PLANNING LANDSCAPE & URBAN SYST, CH-8093 ZURICH, SWITZERLAND.;	URBAN VEGETATION; LEAF AREA DENSITY; RADIATIVE TRANSFER MODELING; 3-D URBAN MODEL RECONSTRUCTION	10.3390/f10080700	ARTICLE	SINGAPORE NATIONAL PARKS BOARD (NPARKS) PROJECT "REMOTE SENSING FOR URBAN TREE MANAGEMENT: SPECIES CLASSIFICATION AND HEALTH MONITORING"; ETH ZURICH [FI 370074016]; SINGAPORE'S NATIONAL RESEARCH FOUNDATION [FI 370074016]	THIS RESEARCH WAS CONDUCTED AT THE FUTURE CITIES LABORATORY, SINGAPORE-ETH CENTRE, WHICH WAS ESTABLISHED COLLABORATIVELY BETWEEN ETH ZURICH AND SINGAPORE'S NATIONAL RESEARCH FOUNDATION (FI 370074016) UNDER ITS CAMPUS FOR RESEARCH EXCELLENCE AND TECHNOLOGICAL ENTERPRISE PROGRAMME. SHANSHAN WEI IS FUNDED BY THE SINGAPORE NATIONAL PARKS BOARD (NPARKS) PROJECT "REMOTE SENSING FOR URBAN TREE MANAGEMEN…	TRANSFER MODEL; DENSITY; TEMPERATURE; ENVIRONMENT; CLIMATE; FLUXES; TREES	FORESTS	ENGLISH			MDPI	2019	YIN, TG (AUTOR CORRESPONDENTE), UNIV MARYLAND, EARTH SYST SCI INTERDISCIPLINARY CTR, COLLEGE PK, MD 20740 USA.		FORESTS	15	3D RECONSTRUCTION OF AN URBAN LANDSCAPE TO ASSESS THE INFLUENCE OF VEGETATION IN THE RADIATIVE BUDGET	10	Singapore	1.35208	103.82	-	-
MANOCHA N;BABOVIC V	IN CASES, WHICH ARE CHARACTERIZED BY DEEP UNCERTAINTY IT IS APPROPRIATE TO DEVELOP DYNAMIC AND ADAPTABLE PLANS. THIS PAPER PRESENTS AN APPROACH THAT USES MULTI-OBJECTIVE GENETIC ALGORITHMS TO AUTOMATE THE DEVELOPMENT OF DYNAMIC ADAPTATION PATHWAYS FOR STORMWATER MANAGEMENT FOR A TROPICAL URBAN CATCHMENT LOCATED IN SINGAPORE. PATHWAYS SPANNING A RANGE OF CLIMATE AND LANDUSE SCENARIOS ARE DEVELOPED…		NATL UNIV SINGAPORE, SINGAPORE 117576, SINGAPORE.;	ADAPTATION PATHWAYS; UNCERTAINTY; CLIMATE CHANGE; URBAN DRAINAGE; REAL OPTIONS; MULTI-OBJECTIVE OPTIMIZATION	10.1016/j.envsci.2018.09.012	ARTICLE			CLIMATE; ADAPTATION	ENVIRON. SCI. POLICY	ENGLISH			ELSEVIER SCI LTD	2018	MANOCHA, N (AUTOR CORRESPONDENTE), NATL UNIV SINGAPORE, SINGAPORE 117576, SINGAPORE.	1462-9011	ENVIRONMENTAL SCIENCE & POLICY	10	REAL OPTIONS MULTIOBJECTIVE OPTIMIZATION AND THE DEVELOPMENT OF DYNAMICALLY ROBUST ADAPTIVE PATHWAYS	90	Singapore	1.35208	103.82	-	-
HE W;ZHANG L;YUAN C	URBAN AIR TEMPERATURE PROJECTION IS ESSENTIAL TO PREPARE CITIES FOR FUTURE HEAT RISKS. THIS STUDY AIMS TO ANTICIPATE FUTURE AIR TEMPERATURE INCREMENT CONTRIBUTED BY CLIMATE CHANGE AND URBANIZATION. FIRST, WE IDENTIFIED THE RURAL AREA IN SINGAPORE BY HISTORICAL DATA, AND DOWNSCALED GLOBAL/ REGIONAL MODELLING RESULTS TO INVESTIGATE CLIMATE CHANGE AT THE IDENTIFIED RURAL AREA. REPRESENTATIVE CONCENT…	101115	NATL UNIV SINGAPORE, DEPT ARCHITECTURE, 4 ARCHITECTURE DR, SINGAPORE 117566, SINGAPORE.;	FUTURE AIR TEMPERATURE; GLOBAL CLIMATE CHANGE; URBANIZATION; DOWNSCALING; URBAN MORPHOLOGY PARAMETERS; URBAN-RURAL TEMPERATURE DIFFERENCE	10.1016/j.uclim.2022.101115	ARTICLE	SINGAPORE NATIONAL RESEARCH FOUNDATION (NRF) UNDER ITS CAMPUS FOR RESEARCH EXCELLENCE AND TECHNO-LOGICAL ENTERPRISE (CREATE) PROGRAMME: SINGAPORE ETH CENTRE, FUTURE RESILIENCE SYSTEM II GRANT [R-295-000-169-592]; SINGAPORE MINISTRY OF EDUCATION, NUS PRESIDENTIAL YOUNG PROFESSORSHIP [R-295-000-172-133]	THIS RESEARCH IS SUPPORTED BY SINGAPORE NATIONAL RESEARCH FOUNDATION (NRF) UNDER ITS CAMPUS FOR RESEARCH EXCELLENCE AND TECHNO-LOGICAL ENTERPRISE (CREATE) PROGRAMME: SINGAPORE ETH CENTRE, FUTURE RESILIENCE SYSTEM II GRANT (GRANT NO. R-295-000-169-592), AND SINGAPORE MINISTRY OF EDUCATION, NUS PRESIDENTIAL YOUNG PROFESSORSHIP (GRANT NO. R-295-000-172-133). AUTHORS THANK SINGAPORE NATIONAL ENVIRONM…	URBAN HEAT-ISLAND; SKY VIEW FACTOR; BIAS CORRECTION; DOWNSCALING METHODS; BUILDING DENSITY; STREET CANYONS; CHANGE IMPACT; MODEL; ADAPTATION; INTENSITY	URBAN CLIM.	ENGLISH			ELSEVIER	2022	YUAN, C (AUTOR CORRESPONDENTE), NATL UNIV SINGAPORE, DEPT ARCHITECTURE, 4 ARCHITECTURE DR, SINGAPORE 117566, SINGAPORE.	2212-0955	URBAN CLIMATE	1	FUTURE AIR TEMPERATURE PROJECTION IN HIGHDENSITY TROPICAL CITIES BASED ON GLOBAL CLIMATE CHANGE AND URBANIZATION A STUDY IN SINGAPORE	42	Singapore	1.35208	103.82	-	-
VELASCO E;ROTH M;NORFORD L;MOLINA L	MANY CITIES ARE DEVELOPING POLICIES TO PROMOTE GREENERY AS A MEASURE TO REDUCE THEIR NET GREENHOUSE GAS EMISSIONS. STUDIES SUGGEST THAT URBAN FORESTS MAY REPRESENT AN IMPORTANT CARBON RESERVOIR. HOWEVER, THE POTENTIAL TO DIRECTLY REMOVE CARBON DIOXIDE (CO2) FROM THE ATMOSPHERE BY URBAN VEGETATION IS STILL POORLY SUPPORTED BY SCIENTIFIC EVIDENCE. CURRENT ASSESSMENTS CONSIDER ONLY THE CARBON ACCUMU…		SMART, CTR ENVIRONM SENSING & MODELING CENSAM, 1 CREATE WAY,09-03 CREATE TOWER, SINGAPORE 138602, SINGAPORE.; NATL UNIV SINGAPORE, DEPT GEOG, SINGAPORE 117548, SINGAPORE.; MOLINA CTR ENERGY & ENVIRONM, LA JOLLA, CA USA.;	CARBON SEQUESTRATION; URBAN GREENERY; URBAN FORESTRY; GREENHOUSE GAS EMISSIONS; CARBON DIOXIDE; EDDY COVARIANCE	10.1016/j.landurbplan.2015.12.003	ARTICLE	NATIONAL RESEARCH FOUNDATION SINGAPORE THROUGH THE SINGAPORE MIT ALLIANCE FOR RESEARCH AND TECHNOLOGY'S CENSAM RESEARCH PROGRAM; NATIONAL UNIVERSITY OF SINGAPORE [R-109-000-091-112]; NATIONAL INSTITUTE OF ECOLOGY AND CLIMATE CHANGE; AIR QUALITY MONITORING NETWORK OF MEXICO CITY OF THE MINISTRY OF ENVIRONMENT OF THE FEDERAL DISTRICT GOVERNMENT	THE RESEARCH IN SINGAPORE WAS SUPPORTED BY THE NATIONAL RESEARCH FOUNDATION SINGAPORE THROUGH THE SINGAPORE MIT ALLIANCE FOR RESEARCH AND TECHNOLOGY'S CENSAM RESEARCH PROGRAM AND A NATIONAL UNIVERSITY OF SINGAPORE GRANT TO MR (RESEARCH GRANT R-109-000-091-112). THE RESEARCH IN MEXICO CITY WAS SUPPORTED BY THE NATIONAL INSTITUTE OF ECOLOGY AND CLIMATE CHANGE AND THE AIR QUALITY MONITORING NETWORK …	CO2 EMISSIONS; DIOXIDE; FLUX; BIOMASS; SOIL; FORESTS; CITY; RESPIRATION; VARIABILITY; BALANCE	LANDSC. URBAN PLAN.	ENGLISH			ELSEVIER	2016	VELASCO, E (AUTOR CORRESPONDENTE), SMART, CTR ENVIRONM SENSING & MODELING CENSAM, 1 CREATE WAY,09-03 CREATE TOWER, SINGAPORE 138602, SINGAPORE.	0169-2046	LANDSCAPE AND URBAN PLANNING	100	DOES URBAN VEGETATION ENHANCE CARBON SEQUESTRATION	148	Singapore and Mexico City, Mexico	1.35208	103.82	19.4326	-99.1332
GAMERO-SALINAS J;MONGE-BARRIO A;KISHNANI N;LOPEZ-FIDALGO J;SANCHEZ-OSTIZ A	YEAR-ROUND HIGH TEMPERATURES AND HUMIDITY IN THE TROPICS, COUPLED WITH POOR DESIGN DECISIONS AND CLIMATE CHANGE, CAN CAUSE INDOOR ENVIRONMENTS TO OVERHEAT, AFFECTING HEALTH AND INCREASING ENERGY DEMAND AND CARBON EMISSIONS. PASSIVE COOLING COULD HELP LOWER THE INDOOR OVERHEATING RISK. GIVEN THE GAP IN THE RELATIVE INFLUENCE OF PASSIVE COOLING DESIGN STRATEGIES ON LOWERING THE INDOOR OVERHEATING R…	111417	UNIV NAVARRA, DEPT CONSTRUCT BLDG SERV & STRUCT, SCH ARCHITECTURE, NAVARRA 31009, SPAIN.; UNIV NAVARRA, INST DATA SCI & ARTIFICIAL INTELLIGENCE, NAVARRA 31009, SPAIN.; NATL UNIV SINGAPORE NUS, SCH DESIGN & ENVIRONM, DEPT ARCHITECTURE, 8 ARCHITECTURE DR,SDE4 04-03, SINGAPORE 117356, SINGAPORE.;	PASSIVE COOLING; THERMAL RESILIENCE; THERMAL COMFORT; OVERHEATING; TROPICAL CLIMATE; CLIMATE SCENARIO; NATURAL VENTILATION; SEMI-OUTDOOR SPACE; WALL ABSORPTANCE; SOLAR HEAT GAIN COEFFICIENT	10.1016/j.enbuild.2021.111417	ARTICLE	FRIENDS OF THE UNIVERSITY OF NAVARRA (UNAV)	WE EXTEND OUR GRATITUDE TO FRIENDS OF THE UNIVERSITY OF NAVARRA (UNAV) FOR FUNDING CORRESPONDING AUTHOR'S PHD PROGRAMME. SPE-CIAL THANKS TO GERMAN CAMPOS, FOUNDING MEMBER OF AUREA CONSULT-ING, FOR HIS GUIDANCE ON BUILDING THERMAL SIMULATIONS WITH DESIGNBUILDER/ENERGYPLUS.	THERMAL COMFORT; RELATIVE-HUMIDITY; ENERGY BUILDINGS; IMPACT; SYSTEMS	ENERGY BUILD.	ENGLISH			ELSEVIER SCIENCE SA	2021	GAMERO-SALINAS, J (AUTOR CORRESPONDENTE), UNIV NAVARRA, DEPT CONSTRUCT BLDG SERV & STRUCT, SCH ARCHITECTURE, NAVARRA 31009, SPAIN.	0378-7788	ENERGY AND BUILDINGS	0	PASSIVE COOLING DESIGN STRATEGIES AS ADAPTATION MEASURES FOR LOWERING THE INDOOR OVERHEATING RISK IN TROPICAL CLIMATES	252	Tegucigalpa and San Pedro Sula, Honduras	14.0723	-87.1921	15.5149	-87.9923
UPADHYAY S;SINGH R;VERMA P;RAGHUBANSHI A	URBAN ECOSYSTEMS, THE HETEROGENEOUS AND RAPIDLY CHANGING LANDSCAPE, SHOWED A CONSIDERABLE IMPACT ON THE GLOBAL C CYCLE. HOWEVER, STUDIES ENCOMPASSING THE SPATIAL DIFFERENCES IN URBAN LAND USES ON SOIL C DYNAMICS ARE LIMITED IN TROPICAL ECOSYSTEMS. IN THIS STUDY, SEASONAL AND TEMPORAL VARIABILITY IN SOIL CO2 EFFLUX (SCE) AND ITS REGULATORY PHYSICOCHEMICAL VARIABLES UNDER FIVE URBAN LAND USE CLASSE…	113141	BANARAS HINDU UNIV, INST ENVIRONM & SUSTAINABLE DEV IESD, INTEGRAT ECOL LAB IEL, VARANASI 221005, UTTAR PRADESH, INDIA.;	ANTHROPOGENIC IMPACT; LAND USE; NUTRIENT AVAILABILITY; PHYSICOCHEMICAL PROPERTIES; SOIL RESPIRATION; URBAN ECOSYSTEM	10.1016/j.jenvman.2021.113141	ARTICLE	UNIVERSITY GRANTS COMMISSION (UGC), NEW DELHI, INDIA	SU AND RS ARE THANKFUL TO PROF. HEMA SINGH, DEPARTMENT OF BOTANY, INSTITUTE OF SCIENCE, BANARAS HINDU UNIVERSITY, VARANASI FOR HER HELP AND SUPPORT DURING THE STUDY. SU EXTENDS HER THANKS TO DR. RAHUL BHADOURIA, MR. SHIVAM SINGH, DR. TALAT AFREEN, MR. ASHUTOSH SINGH AND MR. SANJAY YADAV, DEPARTMENT OF BOTANY, BHU FOR THEIR HELP DURING SAMPLING AND EXPERIMENTATION. SU, RS AND PV ACKNOWLEDGE THE FI…	ORGANIC-CARBON STOCKS; RESIDENTIAL LAWNS; EXTRACTION METHOD; DIOXIDE EFFLUX; R-PACKAGE; RESPIRATION; URBANIZATION; TEMPERATURE; SENSITIVITY; EMISSIONS	J. ENVIRON. MANAGE.	ENGLISH	34198176		ACADEMIC PRESS LTD- ELSEVIER SCIENCE LTD	2021	RAGHUBANSHI, AS (AUTOR CORRESPONDENTE), BANARAS HINDU UNIV, INST ENVIRONM & SUSTAINABLE DEV IESD, VARANASI 221005, UTTAR PRADESH, INDIA.	0301-4797	JOURNAL OF ENVIRONMENTAL MANAGEMENT	2	SPATIOTEMPORAL VARIABILITY IN SOIL CO2 EFFLUX AND REGULATORY PHYSICOCHEMICAL PARAMETERS FROM THE TROPICAL URBAN NATURAL AND ANTHROPOGENIC LAND USE CLASSES	295	Varanasi, India	25.3096	83.0057	-	-

## Sheet: sustainable_urbanization_data
AU	AB	AR	C1	DE	DI	DT	FU	FX	ID	JI	LA	PM	PU	PY	RP	SN	SO	TC	TI	VL	SA	LAT1	LON1	LAT2	LON2
VAILSHERY L;JAGANMOHAN M;NAGENDRA H	ONE OF THE FASTEST GROWING CITIES IN INDIA, BANGALORE IS FACING CHALLENGES OF URBAN MICROCLIMATE CHANGE AND INCREASING LEVELS OF AIR POLLUTION. THIS PAPER ASSESSES THE IMPACT OF STREET TREES IN MITIGATING THESE ISSUES. AT TWENTY LOCATIONS IN THE CITY, WE COMPARE SEGMENTS OF ROADS WITH AND WITHOUT TREES, ASSESSING THE RELATIONSHIP OF ENVIRONMENTAL DIFFERENCES WITH THE PRESENCE OR ABSENCE OF STREET…		ATREE, BANGALORE 560064, KARNATAKA, INDIA.;	CLIMATE CHANGE; SUSTAINABILITY; TREE PLANTATION; URBAN FORESTS; URBAN HEAT ISLANDS	10.1016/j.ufug.2013.03.002	ARTICLE	STOCKHOLM RESILIENCE CENTRE; DEPARTMENT OF SCIENCE AND TECHNOLOGY, GOVERNMENT OF INDIA	WE THANK THE DEPARTMENTS OF ENVIRONMENTAL SCIENCE AT ST. JOSEPHS COLLEGE OF ARTS AND SCIENCE AND MOUNT CARMEL COLLEGE, BANGALORE, FOR THEIR COOPERATION WITH THIS RESEARCH, AND ARE ESPECIALLY APPRECIATIVE OF THE SUPPORT PROVIDED BY M.R.E. WILSON, B.S. PRABHAKAR, AND HELEN KENNEDY. WE ALSO THANK SUPARSH NAGENDRAN, RICHA CHOWDHARY, SIDDHARTH JUDE MACHADO AND VIGNESH S. FOR THEIR ASSISTANCE WITH FIEL…	URBAN HEAT-ISLAND; SURFACE-TEMPERATURE; THERMAL COMFORT; HUMID CITY; QUALITY; COLOMBO; IMPACT	URBAN FOR. URBAN GREEN.	ENGLISH		ELSEVIER GMBH	2013	NAGENDRA, H (AUTOR CORRESPONDENTE), ATREE, JAKKUR PO, BANGALORE 560064, KARNATAKA, INDIA.	1618-8667	URBAN FORESTRY & URBAN GREENING	127	EFFECT OF STREET TREES ON MICROCLIMATE AND AIR POLLUTION IN A TROPICAL CITY	12	Bangalore, India	12.9716	77.5946	-	-
DE O S J;COHEN J	CITIES EXPERIENCE THE EXTENSIVE URBAN HEAT ISLAND EFFECT (UHI), WHICH CONTINUE TO POSE CHALLENGES FOR HUMANITY'S INCREASINGLY URBAN POPULATION, WHERE TROPICAL CITIES HAVE EXPERIENCED A CONTINUED AND RAPID URBANIZATION PROCESS IN THE PAST FEW DECADES. WE PRESENT THE EVOLUTION OF SURFACE UHI AND ITS CONTROLLING FACTORS IN THE METROPOLITAN REGION OF BELÉM, OVER THE LAST 16 YEARS (2003-2018), WHICH H…	E20200260	UNIVERSIDADE FEDERAL DO PARÁ, INSTITUTO DE GEOCIÊNCIAS, BELÉM, PA, BRAZIL	AMAZONIA; LAND SURFACE TEMPERATURE; REMOTE SENSING; URBAN GROWTH; URBAN HEAT ISLAND	10.1590/2175-3369.013.E20200260	ARTICLE	NATIONAL AERONAUTICS AND SPACE ADMINISTRATIONNATIONAL AERONAUTICS AND SPACE ADMINISTRATION, NASA U.S. GEOLOGICAL SURVEYU.S. GEOLOGICAL SURVEY, USGS UNIVERSIDADE FEDERAL DO PARÁUNIVERSIDADE FEDERAL DO PARÁ, UFPA	THE AUTHORS ARE GRATEFUL FOR FINANCIAL SUPPORT FROM THE GRADUATE PROGRAM IN ENVIRONMENTAL SCIENCES (PPGCA) AT FEDERAL UNIVERSITY OF PARÁ (UFPA). WE ALSO THANK THE NASA AND USGS FOR THE PROVISION OF SATELLITE DATA, THE BRAZILIAN NATIONAL INSTITUTE OF METEOROLOGY (INMET) FOR THE METEOROLOGICAL DATA AND GOOGLE EARTH ENGINE DEVELOPERS FOR THEIR SUPPORT. NA		URBE	ENGLISH		PONTIFICIA UNIVERSIDADE CATOLICA DO PARANA	2021		21753369	URBE	3	SPATIOTEMPORAL VARIABILITY OF URBAN HEAT ISLAND INFLUENCE OF URBANIZATION ON SEASONAL PATTERN OF LAND SURFACE TEMPERATURE IN THE METROPOLITAN REGION OF BELÉM BRAZIL VARIABILIDADE ESPAÇOTEMPORAL DAS ILHAS DE CALOR URBANO INFLUÊNCIA DA URBANIZAÇÃO NO PADRÃO SAZONAL DA TEMPERATURA DA SUPERFÍCIE TERRESTRE NA REGIÃO METROPOLITANA DE BELÉM BRASIL	13	Belém, Brazil	-1.45498	-48.5023	-	-
DAS M;DAS A;MANDAL S	OUTDOOR THERMAL COMFORT (OTC) IS LARGELY INFLUENCED BY URBAN MORPHOLOGY AND GEOMETRY OF THE URBAN LANDSCAPE. IN THIS STUDY, THE LOCAL CLIMATIC ZONES (LCZS) APPROACH WAS ADOPTED TO ASSESS THE OTC IN DIFFERENT SETTINGS OF SRINIKETAN-SANTINIKETAN PLANNING AREA (SSPA) DURING THE SUMMER SEASON. THE BASIC OBJECTIVE OF THIS STUDY IS TO ASSESS OTC FROM BOTH SUBJECTIVE AND OBJECTIVE PERSPECTIVES OVER EIGH…	102433	UNIV GOUR BANGA, DEPT GEOG, MALDA 732103, WEST BENGAL, INDIA.;	LOCAL CLIMATIC ZONES; OUTDOOR THERMAL COMFORT; SUBJECTIVE PERCEPTION; CLIMATE SENSITIVE PLANNING; URBAN SUSTAINABILITY	10.1016/j.scs.2020.102433	ARTICLE	UNIVERSITY GRANTS COMMISSION, NEW DELHI, INDIA [3238/(NET-JULY2016)]	THE AUTHORS WOULD LIKE TO EXPRESS THEIR SINCERE GRATITUDE TO THE EDITOR-IN-CHIEF AND THE RESPECTED REVIEWERS FOR THEIR CRITICAL REVIEW AND CONSTRUCTIVE SUGGESTIONS TO ENRICH THIS RESEARCH ARTICLE. THE AUTHORS WOULD ALSO LIKE TO THANK TO SUKANYA MANDAL (M.A 4TH SEMESTER STUDENT) TO ASSIST DURING FIELD SURVEY. LASTLY, AUTHOR (MANOB DAS) IS ALSO THANKFUL TO UNIVERSITY GRANTS COMMISSION (REF-3238/(NE…	ISLAND MITIGATION STRATEGIES; PHYSIOLOGICALLY EQUIVALENT TEMPERATURE; URBAN RESIDENTIAL COMMUNITY; CLIMATE ZONE SCHEME; MICROCLIMATIC VARIABLES; MEDITERRANEAN CLIMATE; NEUTRAL TEMPERATURE; HUMID CLIMATE; HOT-SUMMER; SPACES	SUST. CITIES SOC.	ENGLISH		ELSEVIER	2020	DAS, A (AUTOR CORRESPONDENTE), UNIV GOUR BANGA, DEPT GEOG, MALDA 732103, WEST BENGAL, INDIA.	2210-6707	SUSTAINABLE CITIES AND SOCIETY	43	OUTDOOR THERMAL COMFORT IN DIFFERENT SETTINGS OF A TROPICAL PLANNING REGION A STUDY ON SRINIKETANSANTINIKETAN PLANNING AREA SSPA EASTERN INDIA	63	Bengal, India	22.9868	87.855	-	-
RAJAN E;AMIRTHAM L	THE VARIATION IN THE ATMOSPHERIC CONDITIONS OF URBAN AREAS TO THE FRINGE AREAS IS TERMED AS URBAN HEAT ISLAND AND IS ATTRIBUTED PREDOMINANTLY TO THE DIFFERENCES IN THE PATTERN OF BUILT ENVIRONMENT. THE AIM OF THIS STUDY IS TWOFOLD; FIRSTLY, TO ASSESS THE HEAT ISLAND INTENSITY IN THE TROPICAL CITY OF CHENNAI THROUGH TRAVERSE METHOD AND SECONDLY TO ESTABLISH THE RELATIONSHIP BETWEEN THE BUILT ENVIR…		SATHYABAMA INST SCI & TECHNOL, CHENNAI, TAMIL NADU, INDIA.; SCH PLANNING & ARCHITECTURE, VIJAYAWADA, ANDHRA PRADESH, INDIA.;	URBAN HEAT ISLAND; URBAN CLIMATE; URBAN MORPHOLOGY; THERMAL COMFORT	10.1007/s10668-021-01344-w	ARTICLE			TEMPORAL VARIATIONS; BOUNDARY-LAYER; TEMPERATURE; DESIGN; CITY; GEOMETRY; HOT; MICROCLIMATE; COLOMBO; CITIES	ENVIRON. DEV. SUSTAIN.	ENGLISH		SPRINGER	2021	AMIRTHAM, LR (AUTOR CORRESPONDENTE), SCH PLANNING & ARCHITECTURE, VIJAYAWADA, ANDHRA PRADESH, INDIA.	1387-585X	ENVIRONMENT DEVELOPMENT AND SUSTAINABILITY	1	URBAN HEAT ISLAND INTENSITY AND EVALUATION OF OUTDOOR THERMAL COMFORT IN CHENNAI INDIA	23	Chennai, India	13.0827	80.2707	-	-
LIN Y;TSAI K	TROPICAL CITIES CAN USE URBAN GREENING DESIGNS FEATURING TREES THAT PROVIDE SHADE AND COOLING IN HOT OUTDOOR ENVIRONMENTS. THE COOLING EFFECT INVOLVES NUMEROUS TREE CHARACTERISTICS THAT ARE NOT EASY TO CONTROL DURING PLANTING DESIGN, SUCH AS THE CANOPY SIZE AND THE OPTICAL PROPERTIES OF LEAVES. PLANTING THE APPROPRIATE TREE SPECIES DOMINATES THE COOLING EFFECTS AND THE HUMAN THERMAL ENVIRONMENT. …	340	NATL CHUNG HSING UNIV, PROGRAM LANDSCAPE & RECREAT, 145 XINGDA RD, TAICHUNG 402, TAIWAN.;	TREE CROWN DIAMETER; SKY VIEW FACTOR (SVF); PHYSIOLOGICALLY EQUIVALENT TEMPERATURE (PET); THERMAL COMFORT; TREE PLANTING DESIGN; URBAN GREENING	10.3390/su9030340	ARTICLE	NATIONAL SCIENCE COUNCIL OF TAIWAN [NSC103-2221-E-507-005, NSC104-2221-E-005-077]	THE AUTHORS WOULD LIKE TO THANK THE NATIONAL SCIENCE COUNCIL OF TAIWAN FOR THE PARTIAL FINANCIAL SUPPORT OF THIS RESEARCH UNDER PROJECT NSC103-2221-E-507-005 AND NSC104-2221-E-005-077. CHRIS LAW IS APPRECIATED FOR HIS EDITORIAL ASSISTANCE.	URBAN ENVIRONMENTS; STREET TREES; VEGETATION; BENEFITS; DESIGN; IMPACTS; SUMMER; ATHENS; GREECE; PARK	SUSTAINABILITY	ENGLISH		MDPI AG	2017	TSAI, KT (AUTOR CORRESPONDENTE), NATL CHUNG HSING UNIV, PROGRAM LANDSCAPE & RECREAT, 145 XINGDA RD, TAICHUNG 402, TAIWAN.	2071-1050	SUSTAINABILITY	17	SCREENING OF TREE SPECIES FOR IMPROVING OUTDOOR HUMAN THERMAL COMFORT IN A TAIWANESE CITY	9	Chiayi, Taiwan	23.4801	120.449	-	-
NADEESHANI M;RAMACHANDRA T;GUNATILAKE S;ZAINUDEEN N	AT PRESENT, THE WORLD IS FACING MANY HURDLES DUE TO THE ADVERSE EFFECTS OF CLIMATE CHANGE AND RAPID URBANIZATION. A LOT OF RURAL LANDS AND VILLAGES ARE MERGED INTO CITIES BY CITIZENS, RESULTING IN HIGH CARBON EMISSION, ESPECIALLY IN THE BUILT ENVIRONMENT. BESIDES, THE BUILDINGS AND THE CONSTRUCTION SECTOR ARE RESPONSIBLE FOR HIGH LEVELS OF RAW MATERIAL CONSUMPTION AND AROUND 40% OF ENERGY- AND PR…	6745	UNIV MORATUWA, DEPT BLDG ECON, MORATUWA 10400, SRI LANKA.;	CARBON EMISSION; CARBON FOOTPRINT; ENERGY CONSUMPTION; GREEN ROOFS; HEAT TRANSFER; URBANIZATION	10.3390/su13126745	ARTICLE	UNIVERSITY OF MORATUWA SENATE RESEARCH COMMITTEE	AUTHORS GREATLY ACKNOWLEDGE THE FINANCIAL SUPPORT GIVEN BY THE UNIVERSITY OF MORATUWA SENATE RESEARCH COMMITTEE FOR THE OPEN ACCESS PUBLISHING.	BENEFITS	SUSTAINABILITY	ENGLISH		MDPI	2021	NADEESHANI, M (AUTOR CORRESPONDENTE), UNIV MORATUWA, DEPT BLDG ECON, MORATUWA 10400, SRI LANKA.		SUSTAINABILITY	5	CARBON FOOTPRINT OF GREEN ROOFING A CASE STUDY FROM SRI LANKAN CONSTRUCTION INDUSTRY	13	Colombo, Sri Lanka	6.92708	79.8612	-	-
HADDAD S;PAOLINI R;ULPIANI G;SYNNEFA A;HATVANI-KOVACS G;GARSHASBI S;FOX J;VASILAKOPOULOU K;NIELD L;SANTAMOURIS M	OVERHEATED OUTDOOR ENVIRONMENTS ADVERSELY IMPACT URBAN SUSTAINABILITY AND LIVABILITY. URBAN AREAS ARE PARTICULARLY AFFECTED BY HEAT WAVES AND GLOBAL CLIMATE CHANGE, WHICH IS A SERIOUS THREAT DUE TO INCREASING HEAT STRESS AND THERMAL RISK FOR RESIDENTS. THE TROPICAL CITY OF DARWIN, AUSTRALIA, FOR EXAMPLE, IS ESPECIALLY SUSCEPTIBLE TO URBAN OVERHEATING THAT CAN KILL INHABITANTS. HERE, USING A MODEL…	14216	UNIV NEW SOUTH WALES, UNSW BUILT ENVIRONM, SYDNEY, NSW, AUSTRALIA.;		10.1038/s41598-020-71148-x	ARTICLE	NORTHERN TERRITORY GOVERNMENT, NT, AUSTRALIA [RG170272, RG190681]	THIS STUDY WAS SUPPORTED BY THE NORTHERN TERRITORY GOVERNMENT, NT, AUSTRALIA, WITH THE RESEARCH CONTRACTS "DARWIN HEAT MITIGATION" (RG170272) AND "DARWIN - SUPERVISION, EXPERIMENT AND EVALUATION OF THE COOLING PERFORMANCE OF THE SHADING AND GREENERY MITIGATION STRUCTURE AND ENERGY SAVING POTENTIAL" (RG190681). WE THANKFULLY ACKNOWLEDGE POWER AND WATER CORPORATION (NT, AUSTRALIA) FOR THE PROVISION…	URBAN HEAT-ISLAND; THERMAL COMFORT; MICROCLIMATE MODEL; AIR; SIMULATION; CITIES; VULNERABILITY; TEMPERATURE; METEOROLOGY; BEHAVIOR	SCI REP	ENGLISH	32848173	NATURE PORTFOLIO	2020	SANTAMOURIS, M (AUTOR CORRESPONDENTE), UNIV NEW SOUTH WALES, UNSW BUILT ENVIRONM, SYDNEY, NSW, AUSTRALIA.	2045-2322	SCIENTIFIC REPORTS	28	HOLISTIC APPROACH TO ASSESS COBENEFITS OF LOCAL CLIMATE MITIGATION IN A HOT HUMID REGION OF AUSTRALIA	10	Darwin, Australia	-12.4634	130.846	-	-
ARULBALAJI P;PADMALAL D;MAYA K	RAPID URBANIZATION AND UNSCIENTIFIC DEVELOPMENTS HAVE RESULTED IN LARGE-SCALE DEGRADATION OF THE ENVIRONMENT AROUND MAJOR CITIES ALL OVER THE WORLD. THE PROBLEM IS ACUTE IN MANY TROPICAL AND SUB-TROPICAL URBAN LOCAL BODIES (ULBS) HAVING HIGH POPULATION DENSITY AND ARE UNDERGOING RAPID ECONOMIC DEVELOPMENTS. LACK OF ADEQUATE STUDIES TO CONTAIN THE ILL-EFFECTS OF DEVELOPMENTS IS MAJOR CHALLENGE BEF…	400	NATIONAL CENTRE FOR EARTH SCIENCE STUDIES, AKKULAM, THIRUVANANTHAPURAM, 695011, INDIA	CLIMATE CHANGE; LAND USE/LAND COVER CHANGES; SOUTHWEST INDIA; URBAN HEAT ISLANDS	10.1007/s12665-020-09120-1	ARTICLE	NATIONAL AERONAUTICS AND SPACE ADMINISTRATIONNATIONAL AERONAUTICS AND SPACE ADMINISTRATION, NASA U.S. GEOLOGICAL SURVEYU.S. GEOLOGICAL SURVEY, USGS	THE AUTHORS ARE GRATEFUL TO DR N. PURNACHANDRA RAO, DIRECTOR, NATIONAL CENTRE FOR EARTH SCIENCE STUDIES (NCESS) FOR HIS CONSTANT ENCOURAGEMENTS AND SUPPORT. THE AUTHORS THANK THE NATIONAL AERONAUTICS AND SPACE ADMINISTRATION (NASA), THE UNITED STATES GEOLOGICAL SURVEY (USGS), AND GOOGLE EARTH FOR REQUIRED DATA THAT ARE USED FOR THE PRESENT STUDY. WE THANK THE REVIEWERS FOR THEIR CRITICAL COMMENTS…	ATMOSPHERIC TEMPERATURE; DECISION MAKING; POPULATION STATISTICS; SURFACE MEASUREMENT; SURFACE PROPERTIES; TROPICS; URBAN GROWTH; DECISION MAKERS; ENVIRONMENT FRIENDLY; HIGH POPULATION DENSITY; LANDSAT IMAGERY; LARGE-SCALE DEGRADATIONS; RAPID URBANIZATIONS; SPATIO-TEMPORAL CHANGES; VEGETATION COVER; LAND SURFACE TEMPERATURE; DECISION MAKING; ECONOMIC DEVELOPMENT; LAND SURFACE; LANDSAT; POPULATION …	ENVIRON. EARTH SCI.	ENGLISH		SPRINGER	2020	ARULBALAJI, P.; NATIONAL CENTRE FOR EARTH SCIENCE STUDIES, AKKULAM, INDIA; EMAIL: ARULBALAJIGEO@GMAIL.COM	18666280	ENVIRONMENTAL EARTH SCIENCES	9	IMPACT OF URBANIZATION AND LAND SURFACE TEMPERATURE CHANGES IN A COASTAL TOWN IN KERALA INDIA	79	Kerala, India	10.8505	76.2711	-	-
MORRIS K;CHAN A;MORRIS K;OOI M;OOZEER M;ABAKR Y;NADZIR M;MOHAMMED I	TROPICAL URBAN CLIMATOLOGY IS NOT WELL UNDERSTOOD. THIS STUDY AIMS TO PROVIDE INSIGHT ON THE INTERACTIONS OF URBANISATION AND THE URBAN CLIMATE. THE WEATHER RESEARCH AND FORECASTING (WRF) MODEL IS USED TO STUDY THE URBAN CLIMATE OF A TROPICAL CONURBATION - KLANG VALLEY, MALAYSIA. ANTHROPOGENIC HEAT AND LANDUSE LANDCOVER DATASETS OF THE VALLEY WERE PARAMETERISED TO IMPROVE MODEL'S PERFORMANCE AND …		UNIV NOTTINGHAM, FAC ENGN, MALAYSIA CAMPUS, SELANGOR, MALAYSIA.; PORT HARCOURT POLYTECH, CESIRI, PORT HARCOURT, RIVERS STATE, NIGERIA.; UNIV PUTRA, DEPT AGRIBUSINESS & BIORESOURCE ECON, SERDANG, SELANGOR, MALAYSIA.; ABDUS SALAAM INT CTR THEORET PHYS, CAMPUS STR COSTIERA 11, I-34151 TRIESTE, ITALY.; UNIV KEBANGSAAN MALAYSIA, FAC SCI & TECHNOL, SCH ENVIRONM & NAT RESOURCE SCI, BANGI, SELANGOR, MALA…		10.1016/j.uclim.2016.12.002	ARTICLE			HEAT-ISLAND; MODEL; CITY; PARAMETERIZATION; PUTRAJAYA; SIMULATIONS; TEMPERATURE; SENSITIVITY; CHINA; TIME	URBAN CLIM.	ENGLISH		ELSEVIER	2017	MORRIS, KI (AUTOR CORRESPONDENTE), UNIV NOTTINGHAM, FAC ENGN, MALAYSIA CAMPUS, SELANGOR, MALAYSIA.	2212-0955	URBAN CLIMATE	16	URBANISATION AND URBAN CLIMATE OF A TROPICAL CONURBATION KLANG VALLEY MALAYSIA	19	Klang Valley, Malaysia	3.15619	101.802	-	-
ZAKI S;TOH H;YAKUB F;SAUDI A;ARDILA-REY J;MUHAMMAD-SUKKI F	EMERGING TROPICAL CITIES ARE EXPERIENCING RAPID POPULATION GROWTH AND DEVELOPMENT, WHICH CAN GREATLY AFFECT THE THERMAL ENVIRONMENTS. THE EFFECTS OF ROADSIDE TREES AND ROAD ORIENTATION ON THE OUTDOOR THERMAL ENVIRONMENT WERE INVESTIGATED ON FOUR DIFFERENT ROADS IN KUALA LUMPUR, MALAYSIA. FIELD MEASUREMENTS WERE CONDUCTED TO ASSESS OUTDOOR THERMAL ENVIRONMENTS, WHERE THE SELECTION OF SITES WAS BAS…	1053	UNIV TEKNOL MALAYSIA, MALAYSIA JAPAN INT INST TECHNOL, JALAN SULTAN YAHYA PETRA, KUALA LUMPUR 54100, MALAYSIA.; UNIV KUALA LUMPUR, INST MED SCI TECHNOL, ENVIRONM HEALTHCARE SECT, ENVIRONM HLTH RES CLUSTER, KAJANG 43000, MALAYSIA.; UNIV TECN FEDERICO SANTA MARIA, DEPT ELECT ENGN, SANTIAGO 8940000, CHILE.; ROBERT GORDON UNIV, SCH ENGN, GARTHDEE RD, ABERDEEN AB10 7GJ, SCOTLAND.;	FIELD MEASUREMENTS; ROADSIDE TREES; ROAD ORIENTATION; THERMAL ENVIRONMENT; THERMAL COMFORT; PHYSIOLOGICAL EQUIVALENT TEMPERATURE	10.3390/su12031053	ARTICLE	MINISTRY OF EDUCATION (MOE) THROUGH FUNDAMENTAL RESEARCH GRANT SCHEME [FRGS/1/2019/TK07/UTM/02/5]; UNIVERSITI TEKNOLOGI MALAYSIA UNDER MATCHING GRANT [01M46]; UNIVERSITI KUALA LUMPUR UNDER THE SHORT TERM RESEARCH GRANT (STRG) [STR18022]; PROJECT FONDECYT [1200055]; PROJECT PI M [19 01]; PROJECT FONDEF [19110165]	THIS WORK WAS SUPPORTED BY MINISTRY OF EDUCATION (MOE) THROUGH FUNDAMENTAL RESEARCH GRANT SCHEME (FRGS/1/2019/TK07/UTM/02/5), UNIVERSITI TEKNOLOGI MALAYSIA UNDER MATCHING GRANT (VOT 01M46), UNIVERSITI KUALA LUMPUR UNDER THE SHORT TERM RESEARCH GRANT (STRG) STR18022, AND BY PROJECT FONDECYT REGULAR 1200055, PROJECT PI M 19 01 AND THE PROJECT FONDEF ID19110165.	URBAN HEAT; CLIMATE-CHANGE; STREET TREE; OUTDOOR; COMFORT; DESIGN; HOT; IMPACT; SPACES; CITIES	SUSTAINABILITY	ENGLISH		MDPI	2020	ZAKI, SA (AUTOR CORRESPONDENTE), UNIV TEKNOL MALAYSIA, MALAYSIA JAPAN INT INST TECHNOL, JALAN SULTAN YAHYA PETRA, KUALA LUMPUR 54100, MALAYSIA.; SAUDI, ASM (AUTOR CORRESPONDENTE), UNIV KUALA LUMPUR, INST MED SCI TECHNOL, ENVIRONM HEALTHCARE SECT, ENVIRONM HLTH RES CLUSTER, KAJANG 43000, MALAYSIA.; MUHAMMAD-SUKKI, F (AUTOR CORRESPONDENTE), ROBERT GORDON UNIV, SCH ENGN, GARTHDEE RD, ABERDEEN AB10 7…		SUSTAINABILITY	11	EFFECTS OF ROADSIDE TREES AND ROAD ORIENTATION ON THERMAL ENVIRONMENT IN A TROPICAL CITY	12	Kuala Lumpur, Malaysia	3.139	101.687	-	-
JAHANDIDEH F;RAMAN S;JAMIL M;SYED Z	WITH THE EXPONENTIAL GROWTH IN DEVELOPMENT OF CITIES AND INCREASING DEMAND FOR CONSTRUCTION, WHICH IS ONE OF THE FACTORS IN ENVIRONMENTAL DEGRADATION, THE NEED FOR CO2 EMISSIONS CONTROL IS ESSENTIAL. IN ORDER TO BALANCE CARBON EMISSIONS ALONG THE LIFE-CYCLE OF CONCRETE STRUCTURES; IN THIS PAPER, WE HAVE ANALYSED THE CARBON EMISSIONS AND ASSESSED THE CARBON FOOTPRINT OF SELECTED CONCRETE STRUCTURE…		DEPARTMENT OF ARCHITECTURE AND BUILT ENVIRONMENT, FACULTY OF ENGINEERING AND BUILT ENVIRONMENT, UNIVERSITI KEBANGSAAN MALAYSIA UKM, BANGI, SELANGOR 43600, MALAYSIA; DEPARTMENT OF ENGINEERING, SCHOOL OF COMPUTING, ENGINEERING AND DIGITAL TECHNOLOGIES, TEESSIDE UNIVERSITY, MIDDLESBROUGH, TS1 3BX, UNITED KINGDOM	CARBON EMISSION; CO2 EMISSION; CONCRETE STRUCTURES; LIFE-CYCLE DESIGN; LIFE-CYCLE SUSTAINABILITY ASSESSMENT (LCSA)	http://dx.doi.org/10.22452/jdbe.vol20no2.3	ARTICLE	MINISTRY OF HIGHER EDUCATION, MALAYSIAMINISTRY OF HIGHER EDUCATION, MALAYSIA, MOHE UNIVERSITI KEBANGSAAN MALAYSIAUNIVERSITI KEBANGSAAN MALAYSIA, FRGS/1/2019/TK01/UKM/02/2	THE AUTHORS WOULD LIKE TO EXPRESS THEIR GRATITUDE TO THE MINISTRY OF HIGHER EDUCATION, MALAYSIA AND UNIVERSITI KEBANGSAAN MALAYSIA FOR PROVIDING THE NECESSARY FUNDING FOR THIS RESEARCH THROUGH THE FRGS GRANT (FRGS/1/2019/TK01/UKM/02/2). NA		J. DES. BUILT ENVIRON.	ENGLISH		UNIVERSITY OF MALAYA	2020	RAMAN, S.N.; DEPARTMENT OF ARCHITECTURE AND BUILT ENVIRONMENT, MALAYSIA; EMAIL: SNRAMAN@GMAIL.COM	18234208	JOURNAL OF DESIGN AND BUILT ENVIRONMENT	3	CARBON FOOTPRINT ASSESSMENT IN THE LIFECYCLE DESIGN OF CONCRETE STRUCTURES IN THE TROPICS A CASE STUDY OF RESIDENTIAL BUILDINGS IN MALAYSIA	20	Kuala Lumpur, Malaysia	3.139	101.687	-	-
REYNOLDS C;ESCOBEDO F;CLERICI N;ZEA-CAMANO J	CITIES THROUGHOUT THE WORLD ARE ADVOCATING HIGHLY PROMOTED TREE PLANTINGS AS A CLIMATE CHANGE MITIGATION MEASURE. ASSESSING THE CARBON OFFSETS ASSOCIATED WITH URBAN TREES RELATIVE TO OTHER CLIMATE CHANGE POLICIES IS VITAL FOR SUSTAINABLE DEVELOPMENT, PLANNING, AND SOLVING ENVIRONMENTAL AND SOCIO-ECONOMIC PROBLEMS, BUT IS DIFFICULT IN DEVELOPING COUNTRIES. WE ESTIMATED AND ASSESSED CARBON DIOXIDE …	785	DUKE UNIV, NICHOLAS SCH ENVIRONM, ENVIRONM HALL,9 CIRCUIT DR, DURHAM, NC 27708 USA.; UNIV ROSARIO, FAC CIENCIAS NAT & MATEMAT, PROGRAMA BIOL, CR 24 63C-69, BOGOTA, COLOMBIA.; UNIV FED PARANA, PROGRAMA POS GRAD ENGN FLORESTAL, AV PREF LOTHARIO MEISSNER 632, BR-80210170 CURITIBA, PARANA, BRAZIL.;	CLIMATE CHANGE MITIGATION; NATURE-BASED SOLUTIONS; URBAN FOREST; CARBON OFFSETS; CLEAN DEVELOPMENT MECHANISM; STREET TREES; ECOSYSTEM SERVICES	10.3390/su9050785	ARTICLE			CLIMATE-CHANGE MITIGATION; SUBTROPICAL URBAN FOREST; STORAGE; SEQUESTRATION; GROWTH; REFORESTATION; DYNAMICS; BIOMASS; STOCKS; AREAS	SUSTAINABILITY	ENGLISH		MDPI	2017	CLERICI, N (AUTOR CORRESPONDENTE), UNIV ROSARIO, FAC CIENCIAS NAT & MATEMAT, PROGRAMA BIOL, CR 24 63C-69, BOGOTA, COLOMBIA.		SUSTAINABILITY	18	DOES GREENING OF NEOTROPICAL CITIES CONSIDERABLY MITIGATE CARBON DIOXIDE EMISSIONS THE CASE OF MEDELLIN COLOMBIA	9	Medellin, Colombia	6.2442	-75.5812	-	-
KOTHARKAR R;BAGADE A;RAMESH A	THE PHYSICAL AND GEOMETRICAL PROPERTIES OF URBAN REGIONS ARE RESPONSIBLE FOR INFLUENCING CANOPY LAYER AIR TEMPERATURE LEADING TO URBAN HEAT ISLAND EFFECT (UHI). LOCAL CLIMATE ZONE (LCZ) LAND COVER CLASSIFICATION SCHEME HAS BEEN WIDELY ADOPTED TO EXAMINE UHI AND INTER URBAN HEAT ISLAND (IUHI). IN TROPICAL CITIES WITH HETEROGENEOUS MIX OF URBAN SURFACE COVER, MORPHOLOGY, THERMAL AND RADIATIVE PROPE…	103586	DEPARTMENT OF ARCHITECTURE AND PLANNING, VISVESVARAYA NATIONAL INSTITUTE OF TECHNOLOGY NAGPURMAHARASHTRA 440010, INDIA	LOCAL CLIMATE ZONE; MITIGATION; MULTIPLE REGRESSION; NUMERICAL MODELING; URBAN HEAT ISLAND	10.1016/j.landurbplan.2019.05.017	ARTICLE	SCIENCE AND ENGINEERING RESEARCH BOARDSCIENCE AND ENGINEERING RESEARCH BOARD, SERB DEPARTMENT OF SCIENCE AND TECHNOLOGYDEPARTMENT OF SCIENCE AND TECHNOLOGY, DOST, SB/S4/AS-110/2013	THE STUDY IS SUPPORTED AND FUNDED BY SCIENCE AND ENGINEERING RESEARCH BOARD, DEPARTMENT OF SCIENCE AND TECHNOLOGY , NEW DELHI, INDIA [DST-SERB PROJECT SB/S4/AS-110/2013 ]. SPECIAL THANKS TO DR. RAVINDRA B KESKAR AND VARUN KOTHARKAR FOR THEIR GUIDANCE ON STATISTICAL ANALYSIS. THE STUDY IS SUPPORTED AND FUNDED BY SCIENCE AND ENGINEERING RESEARCH BOARD, DEPARTMENT OF SCIENCE AND TECHNOLOGY, NEW DELH…	ASPECT RATIO; LANDFORMS; MORPHOLOGY; NUMERICAL MODELS; SURVEYS; THERMAL POLLUTION; TROPICS; CENTRAL BUSINESS DISTRICTS; LAND COVER CLASSIFICATION; LOCAL CLIMATE; MITIGATION; MULTIPLE REGRESSIONS; NUMERICAL MODELING APPROACH; URBAN HEAT ISLAND; URBAN HEAT ISLAND EFFECTS; ATMOSPHERIC TEMPERATURE; AIR TEMPERATURE; CANOPY; CENTRAL BUSINESS DISTRICT; ENVIRONMENTAL ASSESSMENT; HEAT ISLAND; LITERATURE R…	LANDSC. URBAN PLANN.	ENGLISH		ELSEVIER B.V.	2019	KOTHARKAR, R.; DEPARTMENT OF ARCHITECTURE AND PLANNING, VNIT CAMPUS, SOUTH AMBAZARI ROAD, INDIA; EMAIL: RSKOTHARKAR@ARC.VNIT.AC.IN	01692046	LANDSCAPE AND URBAN PLANNING	25	ASSESSING URBAN DRIVERS OF CANOPY LAYER URBAN HEAT ISLAND A NUMERICAL MODELING APPROACH	190	Nagpur, India	21.1525	79.0806	-	-
MELENDEZ-ACKERMAN E;SANTIAGO-BARTOLOMEI R;VILA-RUIZ C;SANTIAGO L;GARCIA-MONTIEL D;VERDEJO-ORTIZ J;MANRIQUE-HERNANDEZ H;HERNANDEZ-CALO E	A GROWING BODY OF WORK HAS EMPHASIZED THE IMPORTANCE OF RESIDENTIAL AREAS TO THE OVERALL GREEN INFRASTRUCTURE OF CITIES AND RECOGNIZES THAT OUTCOMES RELATED TO THESE AREAS ARE BEST STUDIED USING A SOCIAL-ECOLOGICAL APPROACH. WE CONDUCTED VEGETATION SURVEYS TO EVALUATE YARD PRACTICES THAT RELATE TO THE STATE OF THE YARD VEGETATION, INCLUDING SPECIES DIVERSITY AND ABUNDANCE, VEGETATION STRUCTURE, A…	20	UNIV PUERTO RICO, CTR APPL TROP ECOL & CONSERVAT, RIO PIEDRAS, PR 00931 USA.; UNIV PUERTO RICO, DEPT ENVIRONM SCI, RIO PIEDRAS, PR 00931 USA.; UNIV PUERTO RICO, GRAD SCH PLANNING, RIO PIEDRAS, PR 00931 USA.; UNIV PUERTO RICO, DEPT BIOL, CAYEY, PR USA.;	BIODIVERSITY; GREEN INFRASTRUCTURE; RESIDENTIAL YARDS; SOCIAL-ECOLOGICAL SYSTEMS; SOCIOECONOMIC; SUSTAINABILITY; TROPICAL; URBAN	10.5751/ES-06563-190320	ARTICLE	NSF-ULTRA [DBI-0948507]; NSF-REU [DBI-1062769]; DEPARTMENT OF ENVIRONMENTAL SCIENCES, THE GRADUATE SCHOOL OF PLANNING; CENTER FOR APPLIED TROPICAL ECOLOGY AND CONSERVATION (CATEC) OF THE UNIVERSITY OF PUERTO RICO (UPR) AT RIO PIEDRAS CAMPUS [NSF-CREST: HRD-0206200]	THIS STUDY IS PART OF THE SAN JUAN ULTRA COLLABORATIVE PROJECT (SANJUANULTRA.ORG) THAT ADDRESSES THE VULNERABILITIES OF THE RIO PIEDRAS WATERSHED (RPWS) SOCIAL-ECOLOGICAL SYSTEM SUPPORTED BY NSF-ULTRA (DBI-0948507), NSF-REU (DBI-1062769), THE DEPARTMENT OF ENVIRONMENTAL SCIENCES, THE GRADUATE SCHOOL OF PLANNING, AND THE CENTER FOR APPLIED TROPICAL ECOLOGY AND CONSERVATION (CATEC, NSF-CREST: HRD-0…	URBAN DOMESTIC GARDENS; PLANT DIVERSITY; STREET TREES; VEGETATION; PATTERNS; CONSERVATION; BIODIVERSITY; ECOSYSTEMS; PARADISE; PHOENIX	ECOL. SOC.	ENGLISH		RESILIENCE ALLIANCE	2014	MELENDEZ-ACKERMAN, EJ (AUTOR CORRESPONDENTE), UNIV PUERTO RICO, CTR APPL TROP ECOL & CONSERVAT, RIO PIEDRAS, PR 00931 USA.	1708-3087	ECOLOGY AND SOCIETY	26	SOCIOECONOMIC DRIVERS OF YARD SUSTAINABLE PRACTICES IN A TROPICAL CITY	19	San Juan, Puerto Rico	18.4655	-66.1057	-	-
MUNOZ-ERICKSON T	THIS PAPER EXAMINES HOW KNOWLEDGE-ACTION SYSTEMS - THE NETWORKS OF ACTORS INVOLVED IN THE PRODUCTION, SHARING AND USE OF POLICY-RELEVANT KNOWLEDGE - WORK IN THE PROCESS OF DEVELOPING SUSTAINABLE STRATEGIES FOR CITIES. I DEVELOPED AN INTERDISCIPLINARY FRAMEWORK - THE KNOWLEDGE-ACTION SYSTEM ANALYSIS (KASA) FRAMEWORK - THAT INTEGRATES CONCEPTS OF THE CO-PRODUCTION OF KNOWLEDGE AND SOCIAL ORDER WITH…		USDA, INT INST TROP FORESTRY, FOREST SERV, RIO PIEDRAS, PR 00926 USA.;	CO-PRODUCTION; KNOWLEDGE-ACTION SYSTEMS; SCIENCE-POLICY INTERFACE; SUSTAINABILITY; URBAN GOVERNANCE; SOCIAL NETWORKS; BOUNDARY WORK; EPISTEMIC CULTURES; FUTURE VISIONS; TROPICAL CITY	10.1016/j.envsci.2013.09.014	ARTICLE	NATIONAL SCIENCE FOUNDATION [0948507, 0504248]	SPECIAL THANKS TO CLARK MILLER, SHEILA JASANOFF, CHARLES L. REDMAN, KELLI L. LARSON, THADDEUS R. MILLER, AND THE KNOWLEDGE SYSTEMS ANALYSIS GROUP FOR THE INSIGHTS THEY CONTRIBUTED TO THIS RESEARCH. THIS WORK WAS SUPPORTED BY THE NATIONAL SCIENCE FOUNDATION UNDER GRANT NUMBERS 0948507 (URBAN LONG-TERM RESEARCH AREA EXPLORATORY) AND 0504248 (INTEGRATIVE GRADUATE EDUCATION AND RESEARCH TRAINING). AN…	POLICY; POWER; SCIENCE	ENVIRON. SCI. POLICY	ENGLISH		ELSEVIER SCI LTD	2014	MUNOZ-ERICKSON, TA (AUTOR CORRESPONDENTE), USDA, INT INST TROP FORESTRY, FOREST SERV, JARDIN BOT SUR,1201 CALLE CEIBA, RIO PIEDRAS, PR 00926 USA.	1462-9011	ENVIRONMENTAL SCIENCE & POLICY	59	COPRODUCTION OF KNOWLEDGEACTION SYSTEMS IN URBAN SUSTAINABLE GOVERNANCE THE KASA APPROACH	37	San Juan, Puerto Rico	18.4655	-66.1057	-	-
ROTH M;CHOW W	THIS HISTORICAL REVIEW OF 20 STUDIES SINCE THE 1960S EXAMINES THE INFLUENCE OF URBAN DEVELOPMENT ON THE THERMAL ENVIRONMENT IN SINGAPORE, A FAST GROWING TROPICAL ISLAND CITY-STATE. PAST OBSERVATIONS ARE CRITICALLY ASSESSED WITH REGARD TO EXPERIMENTAL CONTROLS AND STATION METADATA. GIVEN THE AVAILABILITY OF HISTORICAL CLIMATE AND DEVELOPMENTAL DATA SPANNING ALMOST 50 YEARS, CHANGES IN URBAN HEAT I…		DEPARTMENT OF GEOGRAPHY, NATIONAL UNIVERSITY OF SINGAPORE, SINGAPORE, SINGAPORE; DEPARTMENT OF ENGINEERING, ARIZONA STATE UNIVERSITY, MESA, AZ, UNITED STATES	CLIMATE CHANGE; SINGAPORE; TROPICAL; URBAN HEAT ISLAND; URBANIZATION	10.1111/sjtg.12003	ARTICLE		NA NA	HEAT ISLAND; HISTORICAL PERSPECTIVE; NOCTURNAL BOUNDARY LAYER; OBSERVATIONAL METHOD; RAINFOREST; RESEARCH WORK; SATELLITE IMAGERY; SECONDARY FOREST; SURFACE TEMPERATURE; URBAN CLIMATE; URBAN DEVELOPMENT; URBANIZATION; SINGAPORE [SINGAPORE (NTN)]; SINGAPORE [SOUTHEAST ASIA]	SINGAP. J. TROP. GEOGR.	ENGLISH			2012	ROTH, M.; DEPARTMENT OF GEOGRAPHY, , SINGAPORE, SINGAPORE; EMAIL: GEOMR@NUS.EDU.SG	01297619	SINGAPORE JOURNAL OF TROPICAL GEOGRAPHY	78	A HISTORICAL REVIEW AND ASSESSMENT OF URBAN HEAT ISLAND RESEARCH IN SINGAPORE	33	Singapore	1.35208	103.82	-	-
JIN H;CUI P;WONG N;IGNATIUS M	IT IS IMPORTANT TO ALLEVIATE THE HEAT ISLAND EFFECT IN URBAN AREAS, ESPECIALLY TROPICAL CITIES. MICROCLIMATE IS NORMALLY AFFECTED BY THE URBAN MORPHOLOGY PARAMETERS. THE OBJECTIVE OF THIS WORK IS TO INVESTIGATE THE CORRELATION BETWEEN AIR TEMPERATURE VARIATIONS AND URBAN MORPHOLOGY PARAMETERS IN TROPICAL CITIES. FIELD MEASUREMENT WAS CARRIED OUT TO RECORD THE AIR TEMPERATURE AT 27 POINTS WITHIN A…	206	HARBIN INST TECHNOL, SCH ARCHITECTURE, HEILONGJIANG COLD REG ARCHITECTURAL SCI KEY LAB, 66 XIDAZHI ST, HARBIN 15001, HEILONGJIANG, PEOPLES R CHINA.; NATL UNIV SINGAPORE, SCH DESIGN & ENVIRONM, DEPT BLDG, 4 ARCHITECTURE DR, SINGAPORE 117566, SINGAPORE.;	URBAN HEAT ISLAND EFFECT; AIR TEMPERATURE; MICROCLIMATE; URBAN MORPHOLOGY PARAMETERS TROPICAL CITY	10.3390/su10010206	ARTICLE			LAND-SURFACE TEMPERATURE; OUTDOOR THERMAL COMFORT; DESIGN PARAMETERS; CITY; AIR; CLIMATE; AREAS; SCALE; MITIGATION; VEGETATION	SUSTAINABILITY	ENGLISH		MDPI	2018	CUI, P (AUTOR CORRESPONDENTE), HARBIN INST TECHNOL, SCH ARCHITECTURE, HEILONGJIANG COLD REG ARCHITECTURAL SCI KEY LAB, 66 XIDAZHI ST, HARBIN 15001, HEILONGJIANG, PEOPLES R CHINA.; CUI, P (AUTOR CORRESPONDENTE), NATL UNIV SINGAPORE, SCH DESIGN & ENVIRONM, DEPT BLDG, 4 ARCHITECTURE DR, SINGAPORE 117566, SINGAPORE.		SUSTAINABILITY	33	ASSESSING THE EFFECTS OF URBAN MORPHOLOGY PARAMETERS ON MICROCLIMATE IN SINGAPORE TO CONTROL THE URBAN HEAT ISLAND EFFECT	10	Singapore	1.35208	103.82	-	-
ACERO J;KOH E;LI X;RUEFENACHT L;PIGNATTA G;NORFORD L	AT THE BEGINNING OF THE 21ST CENTURY, INCREASING AMOUNT OF GREENERY IN URBAN AREAS HAS BEEN A PRIORITY FOR MANY URBAN PLANNERS FOLLOWING A SOCIAL AND ENVIRONMENTAL DEMAND OF THE POPULATION. MANY SUSTAINABILITY BENEFITS CAN BE ATTRIBUTED TO URBAN GREEN INFRASTRUCTURES. IN THIS STUDY WE FOCUS ON ANALYZING THE IMPACT OF VERTICAL GREEN SYSTEMS (VGSS) ON OUTDOOR CLIMATE VARIABLES AND THERMAL COMFORT B…		SMART, CENSAM, 1 CREATE WAY,09-03, SINGAPORE 138602, SINGAPORE.; SEC, 1 CREATE WAY,CREATE TOWER,06-01, SINGAPORE 138602, SINGAPORE.; MIT, DEPT ARCHITECTURE, 265 MASSACHUSETTS AVE, CAMBRIDGE, MA 02139 USA.; UNSW SYDNEY, FAC BUILT ENVIRONM, SYDNEY, NSW 2052, AUSTRALIA.;	OUTDOOR THERMAL COMFORT; VERTICAL GREENERY; MODELLING; FACADE ORIENTATION; WEATHER CONDITIONS	10.1007/s12273-019-0537-1	ARTICLE	SINGAPORE NATIONAL RESEARCH FOUNDATION (NRF) UNDER ITS CAMPUS FOR RESEARCH EXCELLENCE AND TECHNOLOGICAL ENTERPRISE (CREATE) PROGRAMME	THE AUTHORS WOULD LIKE TO THANK RESEARCHERS IN CENSAM-SMART, NATIONAL UNIVERSITY OF SINGAPORE (NUS), SINGAPORE ETH CENTER (SEC) AND TECHNICAL UNIVERSITY OF MUNICH (TUM) FOR THE FRUITFUL DISCUSSIONS IN THE FRAMEWORK OF THE 'COOLING SINGAPORE' PROJECT. THE WORK LEADING TO THESE RESULTS WAS FINANCIALLY SUPPORTED BY THE SINGAPORE NATIONAL RESEARCH FOUNDATION (NRF) UNDER ITS CAMPUS FOR RESEARCH EXCELL…	MEAN RADIANT TEMPERATURE; URBAN HEAT-ISLAND; PERFORMANCE; FACADES; AIR; MICROCLIMATE; COMFORT; ROOFS; VEGETATION; SYSTEMS	BUILD. SIMUL.	ENGLISH		TSINGHUA UNIV PRESS	2019	ACERO, JA (AUTOR CORRESPONDENTE), SMART, CENSAM, 1 CREATE WAY,09-03, SINGAPORE 138602, SINGAPORE.	1996-3599	BUILDING SIMULATION	23	THERMAL IMPACT OF THE ORIENTATION AND HEIGHT OF VERTICAL GREENERY ON PEDESTRIANS IN A TROPICAL AREA	12	Singapore	1.35208	103.82	-	-
FRIESS D	ECOSYSTEM SERVICES HAVE GAINED RAPID INTEREST FOR UNDERSTANDING URBAN-ENVIRONMENT INTERACTIONS. HOWEVER, WHILE THE TERM "ECOSYSTEM SERVICES" IS RELATIVELY NOVEL, THEIR PRINCIPLES HAVE INFLUENCED URBAN PLANNING FOR DECADES. THIS STUDY ASSESSES THE WEALTH OF URBAN ECOSYSTEM SERVICES RESEARCH CONDUCTED IN THE TROPICAL CITY STATE OF SINGAPORE, IN PARTICULAR THEIR HISTORICAL LOCAL USE AND IMPLICIT AND…		NATL UNIV SINGAPORE, DEPT GEOG, 1 ARTS LINK, SINGAPORE 117570, SINGAPORE.;	CARBON; CITY BIODIVERSITY INDEX; CULTURAL ECOSYSTEM SERVICES; GARDEN CITY; URBAN HEAT ISLAND	10.1007/s11252-016-0592-7	ARTICLE	MINISTRY OF EDUCATION [R-109-000-166-112]	THIS STUDY WAS SUPPORTED BY THE MINISTRY OF EDUCATION (R-109-000-166-112). THANK YOU TO THE NATIONAL PARKS BOARD FOR THEIR CONTINUED SUPPORT FOR URBAN ECOSYSTEM SERVICES RESEARCH. THANK YOU TO THE NATIONAL ARCHIVES OF SINGAPORE, THE MINISTRY OF INFORMATION AND THE ARTS, PRIMARY PRODUCTION DEPARTMENT (NOW THE AGRI-FOOD & VETERINARY AUTHORITY) AND THE SINGAPORE TOURISM BOARD FOR PERMISSION TO REPRO…	COASTAL HABITATS; HEAT-ISLAND; CITY; CARBON; URBANIZATION; BIODIVERSITY; MICROCLIMATE; PERSPECTIVES; VEGETATION; LANDSCAPE	URBAN ECOSYST.	ENGLISH		SPRINGER	2017	FRIESS, DA (AUTOR CORRESPONDENTE), NATL UNIV SINGAPORE, DEPT GEOG, 1 ARTS LINK, SINGAPORE 117570, SINGAPORE.	1083-8155	URBAN ECOSYSTEMS	19	SINGAPORE AS A LONGTERM CASE STUDY FOR TROPICAL URBAN ECOSYSTEM SERVICES	20	Singapore	1.35208	103.82	-	-
TAN B;GAW L;MASOUDI M;RICHARDS D	RAPID URBANIZATION IN MANY PARTS OF THE WORLD HAS INCREASINGLY PUT THE ENVIRONMENT UNDER PRESSURE, WITH NATURAL LANDSCAPES CLEARED TO MAKE WAY FOR BUILT INFRASTRUCTURE. URBAN ECOSYSTEMS, AND THE SERVICES THAT THEY PROVIDE, CAN OFFER NATURE-BASED SOLUTIONS TO THE CHALLENGES OF URBANIZATION. THERE IS INCREASING INTEREST IN BETTER INCORPORATING ECOSYSTEMS INTO URBAN PLANNING AND DESIGN IN ORDER TO D…	610155	SWISS FED INST TECHNOL, SINGAPORE ETH CTR, NAT CAPITAL SINGAPORE, ZURICH, SINGAPORE.; CAMPUS RES EXCELLENCE & TECHNOL ENTERPRISE, SINGAPORE, SINGAPORE.; NATL UNIV SINGAPORE, SCH DESIGN & ENVIRONM, SINGAPORE, SINGAPORE.;	NATURAL CAPITAL; LAND COVER; ENVIRONMENTAL MODELING; URBAN PLANNING; SCENARIOS	10.3389/fenvs.2021.610155	ARTICLE	NATIONAL RESEARCH FOUNDATION, PRIME MINISTER'S OFFICE, SINGAPORE UNDER ITS CAMPUS FOR RESEARCH EXCELLENCE AND TECHNOLOGICAL ENTERPRISE (CREATE) PROGRAM [NRF2016-ITC001-013]	THIS RESEARCH IS SUPPORTED BY THE NATIONAL RESEARCH FOUNDATION, PRIME MINISTER'S OFFICE, SINGAPORE UNDER ITS CAMPUS FOR RESEARCH EXCELLENCE AND TECHNOLOGICAL ENTERPRISE (CREATE) PROGRAM (NRF2016-ITC001-013).	AIR-POLLUTION REMOVAL; BENEFITS; DEMAND; URBANIZATION; MANAGEMENT; CAPACITY; TREES; FLOW	FRONT. ENVIRON. SCI.	ENGLISH		FRONTIERS MEDIA SA	2021	TAN, BA; GAW, LYF (AUTOR CORRESPONDENTE), SWISS FED INST TECHNOL, SINGAPORE ETH CTR, NAT CAPITAL SINGAPORE, ZURICH, SINGAPORE.; TAN, BA; GAW, LYF (AUTOR CORRESPONDENTE), CAMPUS RES EXCELLENCE & TECHNOL ENTERPRISE, SINGAPORE, SINGAPORE.		FRONTIERS IN ENVIRONMENTAL SCIENCE	4	NATUREBASED SOLUTIONS FOR URBAN SUSTAINABILITY AN ECOSYSTEM SERVICES ASSESSMENT OF PLANS FOR SINGAPORES FIRST FOREST TOWN	9	Singapore	1.35208	103.82	-	-
FUNG T;RICHARDS D;LEONG R;GHOSH S;TAN C;DRILLET Z;LEONG K;EDWARDS P	HEALTHY SOIL ECOSYSTEMS ARE IMPORTANT FOR URBAN SUSTAINABILITY, BECAUSE THEY PROVIDE THE BASIS FOR ECOSYSTEM SERVICES SUCH AS FLOOD REGULATION, NUTRIENT CYCLING AND CARBON SEQUESTRATION. WE INVESTIGATED THE SOILS BENEATH FIVE TYPES OF URBAN LAND COVER IN THE TROPICAL CITY OF SINGAPORE-SECONDARY FOREST, MANAGED GRASS, SHRUBS, TREES, AND TREES WITH SHRUBS. WE QUANTIFIED THE CAPACITY OF THESE SOILS …		SWISS FED INST TECHNOL, SINGAPORE ETH CTR, FUTURE CITIES LAB, SINGAPORE, SINGAPORE.; NATL UNIV SINGAPORE, DEPT BIOL SCI, CTR NAT BASED CLIMATE SOLUT, SINGAPORE, SINGAPORE.; NATL PK BOARD, CTR URBAN GREENERY & ECOL, SINGAPORE, SINGAPORE.; UNIV NEW ENGLAND, SCH ENVIRONM & RURAL SCI, ARMIDALE, NSW 2351, AUSTRALIA.;	URBAN SOILS; VEGETATION MANAGEMENT; ECOSYSTEM FUNCTIONS; URBAN LAND COVERS; LITTER DECOMPOSITION; INFILTRATION; TROPICAL CITY	10.1007/s11252-021-01126-2	ARTICLE	SINGAPORE'S NATIONAL RESEARCH FOUNDATION [FI 370074016]; ETH ZURICH [FI 370074016]	THE RESEARCH WAS CONDUCTED AT THE FUTURE CITIES LABORATORY AT THE SINGAPORE-ETH CENTRE, WHICH WAS ESTABLISHED COLLABORATIVELY BETWEEN ETH ZURICH AND SINGAPORE'S NATIONAL RESEARCH FOUNDATION (FI 370074016) UNDER ITS CAMPUS FOR RESEARCH EXCELLENCE AND TECHNOLOGICAL ENTERPRISE PROGRAMME. THE FUNDERS HAD NO ROLE IN STUDY DESIGN, DATA COLLECTION AND ANALYSIS, DECISION TO PUBLISH, OR PREPARATION OF THE…	TEA BAG INDEX; ECOSYSTEM SERVICES; PHYSICAL-PROPERTIES; HABITAT COMPLEXITY; ADINANDRA BELUKAR; VEGETATION; FOREST; STORMWATER; MANAGEMENT; SINGAPORE	URBAN ECOSYST.	ENGLISH		SPRINGER	2022	FUNG, TK (AUTOR CORRESPONDENTE), SWISS FED INST TECHNOL, SINGAPORE ETH CTR, FUTURE CITIES LAB, SINGAPORE, SINGAPORE.; FUNG, TK (AUTOR CORRESPONDENTE), NATL UNIV SINGAPORE, DEPT BIOL SCI, CTR NAT BASED CLIMATE SOLUT, SINGAPORE, SINGAPORE.	1083-8155	URBAN ECOSYSTEMS	4	LITTER DECOMPOSITION AND INFILTRATION CAPACITIES IN SOILS OF DIFFERENT TROPICAL URBAN LAND COVERS	25	Singapore	1.35208	103.82	-	-
CHUI T;TRINH D	TO MITIGATE THE IMPACTS OF IMPERVIOUS SURFACES IN URBAN AREAS, STRUCTURES SUCH AS BIORETENTION SYSTEMS AND PERMEABLE PAVEMENTS HAVE BEEN INSTALLED TO ENHANCE INFILTRATION IN MANY COUNTRIES. HOWEVER, RELATIVELY LITTLE KNOWLEDGE IS AVAILABLE REGARDING THE PERFORMANCE OF SUCH INFILTRATION-BASED STRUCTURES IN HUMID TROPICAL AND HIGHLY URBANIZED AREAS. THIS STUDY INVESTIGATES THE FEASIBILITY OF ENHANC…		DEPARTMENT OF CIVIL ENGINEERING, THE UNIVERSITY OF HONG KONG, POK FU LAM, HONG KONG; DEPARTMENT OF CIVIL AND ENVIRONMENTAL ENGINEERING, NATIONAL UNIVERSITY OF SINGAPORE, SINGAPORE	INFILTRATION; LOW-IMPACT DEVELOPMENT; STORMWATER MANAGEMENT; SUSTAINABLE DRAINAGE SYSTEM; TROPICS	10.1002/hyp.10926	ARTICLE		NA NA	CATCHMENTS; ENGINEERING GEOLOGY; GROUNDWATER; RAIN; RUNOFF; STORM SEWERS; STORMS; TROPICS; GROUND WATER RECHARGE; HIGHLY URBANIZED AREAS; IMPERVIOUS SURFACE; LOW IMPACT DEVELOPMENT; OVERALL EFFECTIVENESS; PERMEABLE PAVEMENTS; STORM-WATER MANAGEMENTS; SUSTAINABLE DRAINAGE SYSTEMS; INFILTRATION; CATCHMENT; DRAINAGE; INFILTRATION; MODELING; PAVEMENT; RECHARGE; STORMWATER; SUSTAINABILITY; URBAN AREA;…	HYDROL. PROCESSES	ENGLISH		JOHN WILEY AND SONS LTD	2016	CHUI, T.F.M.; DEPARTMENT OF CIVIL ENGINEERING, POK FU LAM, HONG KONG; EMAIL: MAYCHUI@HKU.HK	08856087	HYDROLOGICAL PROCESSES	23	MODELLING INFILTRATION ENHANCEMENT IN A TROPICAL URBAN CATCHMENT FOR IMPROVED STORMWATER MANAGEMENT	30	Singapore	1.35208	103.82	-	-
OH R;RICHARDS D;YEE A	COMMUNITY-DRIVEN VERTICAL GREENERY PROVIDES A PREVIOUSLY UNDER-APPRECIATED RESOURCE THAT COULD BE AN IMPORTANT COMPONENT OF TROPICAL URBAN ECOLOGY. WHILE THE CORRIDORS OF BUILDINGS HAVE BEEN DESIGNED TO FACILITATE THE CIRCULATION OF RESIDENTS BETWEEN SPACES, THIS STUDY SHOWS THAT SUCH CORRIDORS INCIDENTALLY SERVED AS AN INFORMAL SPACE FOR COMMUNITY-DRIVEN VERTICAL GREENERY. ACROSS 1.86 HA OF SURV…		NATL PK BOARD, CTR URBAN GREENERY & ECOL, SINGAPORE, SINGAPORE.; SINGAPORE ETH CTR, FUTURE CITIES LAB, ETH ZURICH, SINGAPORE, SINGAPORE.;	ECOSYSTEM SERVICES; VERTICAL GREENERY; URBAN ECOLOGY; INFORMAL GREEN SPACE; GARDEN	https://doi.org/10.1016/j.landurbplan.2017.08.014	ARTICLE	FUTURE CITIES LABORATORY AT THE SINGAPORE-ETH CENTRE UNDER ITS CAMPUS FOR RESEARCH EXCELLENCE AND TECHNOLOGICAL ENTERPRISE PROGRAMME [FI 370074016]; ETH ZURICH UNDER ITS CAMPUS FOR RESEARCH EXCELLENCE AND TECHNOLOGICAL ENTERPRISE PROGRAMME [FI 370074016]; SINGAPORE'S NATIONAL RESEARCH FOUNDATION UNDER ITS CAMPUS FOR RESEARCH EXCELLENCE AND TECHNOLOGICAL ENTERPRISE PROGRAMME [FI 370074016]	THE AUTHORS WISH TO THANK NG SILI AND LEE WAN HOON FOR THEIR RESEARCH ASSISTANCE IN THIS STUDY, AND COLLEAGUES FROM THE SINGAPORE HERBARIUM (SING) FOR THEIR KIND ASSISTANCE IN PLANT IDENTIFICATIONS. WE ARE GRATEFUL ALSO TO OUR THREE REVIEWERS FOR THEIR INSIGHTFUL COMMENTS. D.R.R. WAS SUPPORTED BY THE FUTURE CITIES LABORATORY AT THE SINGAPORE-ETH CENTRE, WHICH WAS ESTABLISHED COLLABORATIVELY BETWE…	DAYLIGHT ILLUMINANCE; URBAN GREENERY; SHADE; CONSERVATION; ROOFS; ENVIRONMENT; ADAPTATION; LANDSCAPE; ECOLOGY; PEOPLE	LANDSC. URBAN PLAN.	ENGLISH		ELSEVIER SCIENCE BV	2018	OH, RRY (AUTOR CORRESPONDENTE), NATL PK BOARD, CTR URBAN GREENERY & ECOL, SINGAPORE, SINGAPORE.	0169-2046	LANDSCAPE AND URBAN PLANNING	8	COMMUNITYDRIVEN SKYRISE GREENERY IN A DENSE TROPICAL CITY PROVIDES BIODIVERSITY AND ECOSYSTEM SERVICE BENEFITS	169	Singapore	1.35208	103.82	-	-

## Sheet: protecting_biodiversity_data
AU	AB	AR	C1	DE	DI	DT	FU	FX	ID	JI	LA	PM	PU	PY	RP	SN	SO	TC	TI	VL	SA	LAT1	LON1	LAT2	LON2
THAWEEPWORADEJ P;EVANS K	URBANIZATION IS A MAJOR DRIVER OF TROPICAL BIODIVERSITY LOSS. IN TEMPERATE REGIONS AVIAN SPECIES RICHNESS-URBANIZATION INTENSITY RELATIONSHIPS TYPICALLY EXHIBIT UNIMODAL PATTERNS, WITH PEAK RICHNESS AT INTERMEDIATE URBANIZATION LEVELS. IN TROPICAL REGIONS, THE FORM OF SUCH RELATIONSHIPS AND THE EXTENT TO WHICH THEY ARE MODERATED BY PATCHES OF SEMINATURAL HABITAT ARE UNCLEAR. WE ADDRESS THESE QUES…	E2586	UNIV SHEFFIELD, SCH BIOSCI, SHEFFIELD, S YORKSHIRE, ENGLAND.;	AVIAN ASSEMBLAGE; CITIES; EXOTIC SPECIES; HABITAT CREATION; HABITAT FRAGMENTATION; HABITAT RESTORATION; SPATIAL CONFIGURATION; SPECIES TURNOVER	10.1002/eap.2586	ARTICLE			URBAN GREEN-SPACE; BIRD DIVERSITY; LAND-USE; BIOTIC HOMOGENIZATION; ECOSYSTEM SERVICES; BIODIVERSITY; HABITAT; FOREST; IMPACTS; CITIES	ECOL. APPL.	ENGLISH	35333421	WILEY	2022	THAWEEPWORADEJ, P (AUTOR CORRESPONDENTE), UNIV SHEFFIELD, SCH BIOSCI, SHEFFIELD, S YORKSHIRE, ENGLAND.	1051-0761	ECOLOGICAL APPLICATIONS	0	AVIAN SPECIES RICHNESS AND TROPICAL URBANIZATION GRADIENTS EFFECTS OF WOODLAND RETENTION AND HUMAN DISTURBANCE	32	Bangkok, Thailand	13.7563	100.502	-	-
NASCIMENTO V;AGOSTINI K;SOUZA C;MARUYAMA P	URBAN AREAS CONTRIBUTE TO CONSERVATION OF POLLINATORS, BUT WE LACK ASSESSMENTS FROM THE MOST BIODIVERSE TROPICAL REGIONS IN THE WORLD. WE SYNTHESIZED STUDIES ON URBAN PLANT-POLLINATOR INTERACTIONS ACROSS BRAZIL, COMPILING 86 STUDIES CONDUCTED IN URBAN GREEN SPACES THAT REPORTED 2678 INTERACTIONS FOR 519 PLANT AND 337 ANIMAL SPECIES. WE EVALUATED THE SPATIO-TEMPORAL DISTRIBUTION OF THE DATA, EFFEC…	103801	BAHIA STATE UNIV UNEB, DEPT HUMAN SCI DCH, CAMPUS 9, BR-47800000 BARREIRAS, BA, BRAZIL.; FED UNIV SAO CARLOS UFSCAR, CTR AGR SCI, DEPT NAT SCI MATH & EDUC, BR-13600970 ARARAS, SP, BRAZIL.; FED UNIV PARANA UFPR, DEPT BOT, GRAD PROGRAM BOT, BR-81531980 CURITIBA, PARANA, BRAZIL.; FED UNIV MINAS GERAIS UFMG, CTR ECOL SYNTH & CONSERVAT, DEPT GENET ECOL & EVOLUT ICB, BR-31270901 BELO HORIZONTE, MG, BRA…		10.1016/j.landurbplan.2020.103801	ARTICLE	COORDENACAO DE APERFEICOAMENTO DE PESSOAL DE NIVEL SUPERIOR -CAPES [001]; PRO-REITORIA DE PESQUISA DA UNIVERSIDADE FEDERAL DE MINAS GERAIS	WE THANK PAULO E. OLIVEIRA FOR COMMENTS ON AN EARLIER VERSION OF THE MANUSCRIPT, ERICH A. FISCHER FOR HELP WITH BAT IDENTIFICATION, CAROLINE L. GROSS FOR KINDLY REVISING OUR MANUSCRIPT AND THE FOUR ANONYMOUS REVIEWERS FOR THOUGHTFUL COMMENTS THAT GREATLY IMPROVED THE QUALITY OF THE MANUSCRIPT. CSS WAS SUPPORTED BY COORDENACAO DE APERFEICOAMENTO DE PESSOAL DE NIVEL SUPERIOR -CAPES (FINANCE CODE 00…	NATIVE PLANTS; BIODIVERSITY; MODULARITY; NETWORKS; CITY; BEES; RICHNESS; URBANIZATION; CONSERVATION; ECOSYSTEM	LANDSC. URBAN PLAN.	ENGLISH		ELSEVIER	2020	MARUYAMA, PK (AUTOR CORRESPONDENTE), FED UNIV MINAS GERAIS UFMG, CTR ECOL SYNTH & CONSERVAT, DEPT GENET ECOL & EVOLUT ICB, BR-31270901 BELO HORIZONTE, MG, BRAZIL.	0169-2046	LANDSCAPE AND URBAN PLANNING	9	TROPICAL URBAN AREAS SUPPORT HIGHLY DIVERSE PLANTPOLLINATOR INTERACTIONS AN ASSESSMENT FROM BRAZIL	198	Brazil	-	-	-	-
ESTELA F;SANCHEZ-SARRIA C;ARBELAEZ-CORTES E;OCAMPO D;GARCIA-ARROYO M;PERLAZA-GAMBOA A;WAGNER-WAGNER C;MACGREGOR-FORS I	CHANGES IN THE NOCTURNAL ACTIVITY OF BIRDS DURING THE COVID-19 PANDEMIC LOCKDOWN IN A NEOTROPICAL CITY. THE COVID-19 LOCKDOWN PROVIDED THE OPPORTUNITY TO MEASURE SPECIES BIODIVERSITY IN URBAN ENVIRONMENTS UNDER CONDITIONS DIVERGENT FROM REGULAR URBAN RHYTHMS. FOR 90 DAYS, INCLUDING WEEKS OF STRICT LOCKDOWN AND THE SUBSEQUENT RELAXATION OF RESTRICTIONS, WE MEASURED THE PRESENCE AND ABUNDANCE OF BI…		PONTIFICIA UNIV JAVERIANA, DEPT CIENCIAS NAT & MATEMAT, CALI, COLOMBIA.; AC INECOL, INST ECOL, RED AMBIENTE & SUSTENTABILIDAD, XALAPA, VERACRUZ, MEXICO.; UNIV IND SANTANDER, ESCUELA BIOL, BUCARAMANGA, COLOMBIA.; INST INVEST RECURSOS BIOL ALEXANDER VON HUMBOLDT, VILLA DE LEYVA, COLOMBIA.; UNIV VALLE, DEPT BIOL, GRP INVEST ECOL ANIM, CALI, COLOMBIA.; COLOMBIA BIRDFAIR, CALI, COLOMBIA.; UNIV HELSINK…	ANTHROPAUSE; ARTIFICIAL LIGHT AT NIGHT; COVID-19 LOCKDOWN; TROPICAL CITIES; URBANIZATION; URBAN ECOLOGY	10.32800/abc.2021.44.0213	ARTICLE				ANIM. BIODIVERS. CONSERV.	ENGLISH		MUSEU DE CIENCIES NATURALS-ZOOLOGIA	2021	MACGREGOR-FORS, I (AUTOR CORRESPONDENTE), AC INECOL, INST ECOL, RED AMBIENTE & SUSTENTABILIDAD, XALAPA, VERACRUZ, MEXICO.; MACGREGOR-FORS, I (AUTOR CORRESPONDENTE), UNIV HELSINKI, FAC BIOL & ENVIRONM SCI, ECOSYST & ENVIRONM RES PROGRAMME, NIEMENKATU 73, LAHTI 15140, FINLAND.	1578-665X	ANIMAL BIODIVERSITY AND CONSERVATION	1	CHANGES IN THE NOCTURNAL ACTIVITY OF BIRDS DURING THE COVID19 PANDEMIC LOCKDOWN IN A NEOTROPICAL CITY	44	Cali, Colombia	3.35989	-76.6386	-	-
GANCI C;PROVETE D;PUTTKER T;LINDENMAYER D;ALMEIDA-GOMES M	THE RAPID EXPANSION OF URBAN AREAS IN WHICH NATURAL AND SEMI-NATURAL AREAS ARE REPLACED BY HUMAN INFRASTRUCTURE, IS A MAJOR THREAT TO BIODIVERSITY WORLDWIDE. HOWEVER, LITTLE IS KNOWN ABOUT HOW THE STRUCTURE OF BIOTIC COMMUNITIES IS AFFECTED BY URBANIZATION IN THE TROPICS. HERE, WE TESTED THE EFFECT OF LAND USE TYPES AND POND SIZE IN URBAN AND RURAL AREAS ON FROG SPECIES RICHNESS AND COMMUNITY COM…		UNIV FED MATO GROSSO DO SUL, POSGRAD ECOL & CONSERVACAO, BR-79002970 CAMPO GRANDE, MS, BRAZIL.; UNIV FED MATO GROSSO DO SUL, INST BIOCIENCIAS, BR-79002970 CAMPO GRANDE, MS, BRAZIL.; GOTHENBURG GLOBAL BIODIVERS CTR, SE-450 GOTHENBURG, SWEDEN.; UNIV FED SAO PAULO UNIFESP, DEPT CIENCIAS AMBIENTAIS, BR-09913030 SAO PAULO, BRAZIL.; AUSTRALIAN NATL UNIV, FENNER SCH ENVIRONM & SOC, CANBERRA, ACT, AUSTRA…	BETA DIVERSITY; BIOTIC HOMOGENIZATION; URBANIZATION; TROPICAL ANURANS	10.1007/s11252-021-01174-8	ARTICLE	COORDENACAO DE APERFEICOAMENTO DE PESSOAL DE NIVEL SUPERIOR - BRASIL (CAPES) [001]; UNIVERSIDADE FEDERAL DE MATO GROSSO DO SUL - UFMS/MEC -BRASIL	THIS STUDY WAS FINANCED IN PART BY THE COORDENACAO DE APERFEICOAMENTO DE PESSOAL DE NIVEL SUPERIOR - BRASIL (CAPES) - FINANCE CODE 001 AND UNIVERSIDADE FEDERAL DE MATO GROSSO DO SUL - UFMS/MEC - BRASIL.	DISTURBANCE PROMOTE NESTEDNESS; VISUAL ENCOUNTER SURVEYS; BIOTIC HOMOGENIZATION; WATER-QUALITY; BETA DIVERSITY; LAND-USE; LANDSCAPE; URBANIZATION; HABITAT; BIODIVERSITY	URBAN ECOSYST.	ENGLISH		SPRINGER	2022	GANCI, CC (AUTOR CORRESPONDENTE), UNIV FED MATO GROSSO DO SUL, POSGRAD ECOL & CONSERVACAO, BR-79002970 CAMPO GRANDE, MS, BRAZIL.	1083-8155	URBAN ECOSYSTEMS	1	HIGH SPECIES TURNOVER SHAPES ANURAN COMMUNITY COMPOSITION IN PONDS ALONG AN URBANRURAL GRADIENT	25	Campo Grande, Brazil	-20.4697	-54.6201	-	-
GUPTA H;TIWARI C;DIWAKAR S	THE BUTTERFLY ASSEMBLAGES OF URBAN ECOSYSTEMS OF DELHI WERE STUDIED FOR A PERIOD OF ONE YEAR TO INVESTIGATE THEIR DIVERSITY. THE OBJECTIVE OF THE STUDY WAS TO UNDERSTAND THE DYNAMICS OF THE BUTTERFLY ASSEMBLAGES WITH RESPECT TO CHANGING TEMPERATURE AND HUMIDITY LEVELS. WE TESTED THE HYPOTHESIS THAT THE DIVERSITY OF BUTTERFLIES WOULD DIFFER SIGNIFICANTLY ACROSS SAMPLING PERIOD OWING TO PRONOUNCED …		UNIV DELHI, DEPT ENVIRONM STUDIES, DELHI 110007, INDIA.;	BUTTERFLY DIVERSITY; DELHI; LEPIDOPTERA; MONSOON; POLLARD WALK URBAN BIODIVERSITY; PRE AND POST-MONSOON SEASON	10.1007/s42965-019-00019-y	ARTICLE	SCIENCE AND ENGINEERING RESEARCH BOARD, DEPARTMENT OF SCIENCE AND TECHNOLOGY, INDIA [SB/FT/LS-194/2012]; UNIVERSITY OF DELHI, INDIA [DRCH/R D/2013-14/4155, RC/R D/2014-15]	SD ACKNOWLEDGES SUPPORT FROM SCIENCE AND ENGINEERING RESEARCH BOARD, DEPARTMENT OF SCIENCE AND TECHNOLOGY (SB/FT/LS-194/2012) AND UNIVERSITY OF DELHI (DRCH/R& D/2013-14/4155 AND RC/R& D/2014-15), INDIA FOR RESEARCH FUNDING.	RAIN-FOREST; ABUNDANCE; COMMUNITIES; CLIMATE; CONSERVATION; BIODIVERSITY; SEASONALITY; INDICATORS; SIMILARITY; FRAGMENTS	TROP. ECOL.	ENGLISH		SCIENTIFIC PUBLISHERS	2019	DIWAKAR, S (AUTOR CORRESPONDENTE), UNIV DELHI, DEPT ENVIRONM STUDIES, DELHI 110007, INDIA.	0564-3295	TROPICAL ECOLOGY	10	BUTTERFLY DIVERSITY AND EFFECT OF TEMPERATURE AND HUMIDITY GRADIENTS ON BUTTERFLY ASSEMBLAGES IN A SUBTROPICAL URBAN LANDSCAPE	60	Delhi, India	28.7041	77.1025	-	-
RAWAL P;KITTUR S;CHATAKONDA M;SUNDAR K	URBANISATION CAN LIMIT SPECIES PERSISTENCE AND BIAS COMPOSITION OF FUNCTIONAL GUILDS WITH SERIOUS CONSEQUENCES FOR ECOSYSTEM FUNCTIONING AND CONSERVATION PLANNING. STANDARDISED BIODIVERSITY SURVEYS ARE MISSING AT MOST TROPICAL URBAN CITIES WHERE BIODIVERSITY LEVELS ARE HIGH ALONGSIDE RAPIDLY INCREASING RATES OF URBANISATION. WE EXPLORED THE UTILITY OF TIME-BOUND SURVEYS TO DOCUMENT WINTER BIRDS A…	JUAB001	AMITY INSTITUTE OF FORESTRY AND WILDLIFE, G-14, J1 BLOCK, AMITY UNIVERSITY CAMPUS, SECTOR 125, NOIDA, UTTAR PRADESH, 201303, INDIA; NATURE CONSERVATION FOUNDATION, 1311, "AMRITHA", 12TH MAIN, VIJAYANAGAR 1ST STAGE, MYSURU, KARNATAKA, 570017, INDIA	DELHI; FEEDING GUILDS; HABITAT GUILDS; PONDS IN URBANISED LANDSCAPES; Β-DIVERSITY	10.1093/jue/juab001	ARTICLE		NA NA NA		J. URBAN ECOL.	ENGLISH		OXFORD UNIVERSITY PRESS	2021	SUNDAR, K.S.G.; NATURE CONSERVATION FOUNDATION, 1311, "AMRITHA", 12TH MAIN, VIJAYANAGAR 1ST STAGE, INDIA; EMAIL: GOPI@NCF-INDIA.ORG	20585543	JOURNAL OF URBAN ECOLOGY	3	WINTER BIRD ABUNDANCE SPECIES RICHNESS AND FUNCTIONAL GUILD COMPOSITION AT DELHIS PONDS DOES TIME OF DAY AND WETLAND EXTENT MATTER	7	Delhi, India	28.7041	77.1025	-	-
RAWAL P;KITTUR S;CHATAKONDA M;SUNDAR K	MEGA-CITIES OF THE GLOBAL SOUTH ARE (IN)FAMOUS FOR THEIR SIZE AND HUMAN POPULATIONS WITH LITTLE INFORMATION ON THEIR ABILITY TO CONSERVE URBAN BIODIVERSITY. CREATING NEW HABITATS IN SUCH CITIES IS UNTENABLE BUT RETAINING PERSISTING SMALL HABITAT PATCHES SUCH AS PONDS (WETLANDS <= 5 HA) IS POTENTIALLY PRACTICAL TO SECURE URBAN WILDLIFE REFUGIA. STUDIES ON BIODIVERSITY OF URBAN PONDS IN TROPICAL CI…	109215	AMITY INST FORESTRY & WILDLIFE, G-14,J1 BLOCK,AMITY UNIV CAMPUS,SECT 125, NOIDA 201303, UTTAR PRADESH, INDIA.; NAT CONSERVAT FDN, 1311 AMRITHA,12TH MAIN,VIJAYANAGAR 1ST STAGE, MYSURU 570017, KARNATAKA, INDIA.;	BIRD SPECIES RICHNESS; FEEDING GUILDS; HABITAT GUILDS; MANAGEMENT INTENSITY; SHORELINE DIVERSITY	10.1016/j.biocon.2021.109215	ARTICLE	NATURE CONSERVATION FOUNDATION	THIS PROJECT WAS PART OF REQUIREMENTS OF PR'S GRADUATE STUDIES AT AMITY UNIVERSITY. FINANCIAL SUPPORT WAS PROVIDED BY THE NATURE CONSERVATION FOUNDATION, KSGS AND MKC. K. MEHTA PROVIDED VARIOUS HELP. WE ARE GRATEFUL TO G. AREENDRAN FOR PROVIDING THE CLASSIFIED SENTINEL-2 SATELLITE IMAGERY OF DELHI. WE THANK J.D.A. GRANT, R. NANIWADEKAR, D. TEMPEL AND TWO ANONYMOUS REVIEWERS FOR DISCUSSIONS AND SU…	SPECIES RICHNESS; WETLANDS; BIODIVERSITY; PATTERNS; ECOLOGY; CITIES; IMPACT	BIOL. CONSERV.	ENGLISH		ELSEVIER SCI LTD	2021	SUNDAR, KSG (AUTOR CORRESPONDENTE), NAT CONSERVAT FDN, 1311 AMRITHA,12TH MAIN,VIJAYANAGAR 1ST STAGE, MYSURU 570017, KARNATAKA, INDIA.	0006-3207	BIOLOGICAL CONSERVATION	0	CAPITAL PONDS SITELEVEL HABITAT HETEROGENEITY AND MANAGEMENT INTERVENTIONS AT PONDS REGULATE HIGH LANDSCAPESCALE BIRD DIVERSITY ACROSS A MEGACITY	260	Delhi, India	28.7041	77.1025	-	-
SULTANA M;STORCH I;NASER M;UDDIN M	FACTORS DRIVING URBAN BIODIVERSITY REMAIN POORLY DOCUMENTED IN THE RAPIDLY GROWING TROPICAL CITIES. WE INVESTIGATED THE DRIVERS OF BIRD DIVERSITY IN DHAKA CITY, LOCATED IN BANGLADESH, SOUTH ASIA. USING EXISTING SOURCES, WE COMPILED A BIRD CHECKLIST OF THE CITY. NEXT, WE CONDUCTED POINT-COUNT SURVEYS OF BIRDS ACROSS ITS URBAN AREAS. USING FIELD SURVEY DATA, WE INVESTIGATED URBAN LAND COVER AND SOC…	19	WILDLIFE ECOLOGY AND MANAGEMENT, FACULTY OF ENVIRONMENT AND NATURAL RESOURCES, UNIVERSITY OF FREIBURG, GERMANY; DEPARTMENT OF ZOOLOGY, FACULTY OF BIOLOGICAL SCIENCES, UNIVERSITY OF DHAKA, BANGLADESH; DEPARTMENT OF ZOOLOGY, NARSINGDI GOVERNMENT COLLEGE, BANGLADESH	BIRD; CONSERVATION; IMPERVIOUSNESS; POVERTY; SOUTH ASIA; URBANIZATION	10.5751/ES-12905-270119	ARTICLE	ALBERT-LUDWIGS-UNIVERSITÄT FREIBURGALBERT-LUDWIGS-UNIVERSITÄT FREIBURG	WE ACKNOWLEDGE THE SUPPORT OF ALL THE STUDENTS OF THE UNIVERSITY OF DHAKA, JAGANNATH UNIVERSITY, AND LOCAL ORNITHOLOGISTS WHO ASSISTED DURING THE FIELD SURVEY IN DHAKA. WE THANK A.B.M. SARWAR ALAM AND MOHSIN KOBIR MIRON FOR CROSS-CHECKING AND CORRECTIONS IN THE BIRD CHECKLIST. WE ALSO THANK LUCA CORLATTI FOR HIS ASSISTANCE WITH STATISTICS AND OTTAVIO JANI FOR THE ENGLISH PROOFREADING OF THE FINAL…	BIODIVERSITY; BIRD; HABITAT SELECTION; LAND COVER; MEGACITY; POVERTY; SOCIOECONOMIC CONDITIONS; SOCIOECONOMIC STATUS; SPECIES CONSERVATION; URBANIZATION; BANGLADESH; DHAKA [BANGLADESH]; DHAKA [DHAKA (ADS)]	ECOL. SOC.	ENGLISH		RESILIENCE ALLIANCE	2022		17083087	ECOLOGY AND SOCIETY	0	LAND COVER AND SOCIOECONOMIC FACTORS EXPLAIN AVIAN DIVERSITY IN A TROPICAL MEGACITY	27	Dhaka, Bangladesh	23.8103	90.4125	-	-
DRI G;FONTANA C;DAMBROS C	HABITAT LOSS AND FRAGMENTATION CAN BE LONG-TERM PROCESSES DRIVING EXTINCTION DEBTS, ESPECIALLY IN CITIES. BECAUSE OF A LACK OF TEMPORAL DATA, LONG-TERM IMPACTS ARE GENERALLY INVESTIGATED LESS FREQUENTLY THAN SHORT-TERM IMPACTS. HOWEVER, THESE EFFECTS ARE EQUALLY IMPORTANT FOR UNDERSTANDING BIODIVERSITY LOSS. WE DEVELOPED A BAYESIAN ISLAND BIOGEOGRAPHY MODEL COMBINING HISTORICAL IMAGERY AND CURREN…	109064	UNIV FED SANTA MARIA, CTR CIENCIAS NAT EXATAS, DEPT ECOL & EVOLUCAO, AV RORAIMA 1000, BR-97105900 SANTA MARIA, RS, BRAZIL.; PONTIFICIA UNIV CATOLICA RIO GRANDE DO SUL, PROGRAMA POSGRAD ECOL & EVOLUCAO BIODIVERSIDADE, MUSEU CIENCIAS & TECNOL, AV IPIRANGA 6681,PREDIO 40 SALA 110 B, BR-90619900 PORTO ALEGRE, RS, BRAZIL.;	BIRD COMMUNITY; EXTINCTION DEBTS; FRAGMENTATION; MECHANISTIC MODEL; SPECIES RICHNESS; SOUTH AMERICA	10.1016/j.biocon.2021.109064	ARTICLE	MCTIC/CNPQ [465610/2014-5]; FAPEG [201810267000023]; COORDENACAO DE APERFEICOAMENTO DE PESSOAL DE NIVEL SUPERIOR, BRAZIL [1768603]; CONSELHO NACIONAL DE DESENVOLVIMENTO CIENTIFICO E TECNOLOGICO [309438/2016-0]	WE ARE GRATEFUL TO ANDERSON SALDANHA BUENO, GERUZA LEAL MELO, AND THREE ANONYMOUS REVIEWERS FOR VALUABLE SUGGESTIONS IN THE MANUSCRIPT, AND ALSO ALLISON BREHM FOR THE ENGLISH REVIEW. THIS PAPER IS DEVELOPED IN THE CONTEXT OF NATIONAL INSTITUTES FOR SCIENCE AND TECHNOLOGY (INCT) IN ECOLOGY, EVOLUTION AND BIODIVERSITY CONSERVATION, SUPPORTED BY MCTIC/CNPQ (PROC. 465610/2014-5) AND FAPEG (PROC. 2018…	EXPERIMENTAL ZOOGEOGRAPHY; ISLANDS; MODEL; AREA; COLONIZATION; BIODIVERSITY; FRAMEWORK; DEBT; TIME	BIOL. CONSERV.	ENGLISH		ELSEVIER SCI LTD	2021	DRI, GF (AUTOR CORRESPONDENTE), UNIV MAINE, DEPT WILDLIFE FISHERIES & CONSERVAT BIOL, 5755 NUTTING HALL,ROOM 244, ORONO, ME 04469 USA.	0006-3207	BIOLOGICAL CONSERVATION	2	ESTIMATING THE IMPACTS OF HABITAT LOSS INDUCED BY URBANIZATION ON BIRD LOCAL EXTINCTIONS	256	Florianópolis, Brazil	-27.5969	-48.5496	-	-
JIM C	HONG KONG'S RUGGED TOPOGRAPHY DEMANDS CREATION OF DEVELOPABLE LAND BY RECLAIMING THE HARBOR AND TERRACING HILLSLOPES. THE VERTICAL FACES BETWEEN ADJOINING HILLSLOPE-PLATFORMS ARE OFTEN STABILIZED BY STONE RETAINING WALLS. SUCH ARTIFICIAL CLIFFS EMBEDDED IN THE URBAN MATRIX, AS A HABITAT ANALOGUE OF ROCKY CLIFFS, HAVE BEEN COLONIZED BY SPONTANEOUS-RUDERAL VEGETATION. DETAILED FIELD ASSESSMENT OF 2…		UNIV HONG KONG, DEPT GEOG, HONG KONG, HONG KONG, PEOPLES R CHINA.;	ARTIFICIAL CLIFF; FICUS TREE; FRUGIVORE DISPERSAL; HABITAT ANALOGUE; STONE RETAINING WALL; STRANGLER HABIT	10.1007/s11252-013-0322-3	ARTICLE	DR STANLEY HO ALUMNI CHALLENGE FUND; UNIVERSITY GRANTS COMMITTEE	I ACKNOWLEDGE WITH GRATITUDE THE GRANTS KINDLY AWARDED BY THE DR STANLEY HO ALUMNI CHALLENGE FUND AND THE UNIVERSITY GRANTS COMMITTEE. THE FIELD WORK ASSISTANCE PROVIDED BY JEANNETTE LIU AND WY WONG IS APPRECIATED.	AERIAL ROOTS; YORKSHIRE-WOLDS; HONG-KONG; VEGETATION; GROWTH; FOREST; TREES; BIODIVERSITY; GERMINATION; SURVIVAL	URBAN ECOSYST.	ENGLISH		SPRINGER	2014	JIM, CY (AUTOR CORRESPONDENTE), UNIV HONG KONG, DEPT GEOG, POKFULAM RD, HONG KONG, HONG KONG, PEOPLES R CHINA.	1083-8155	URBAN ECOSYSTEMS	15	ECOLOGY AND CONSERVATION OF STRANGLER FIGS IN URBAN WALL HABITATS	17	Hong Kong	22.3964	114.109	-	-
DE A A	URBANIZATION, WITH ITS COHORT OF ENVIRONMENTAL STRESSORS, HAS A DRAMATIC EFFECT ON WILDLIFE, CAUSING LOSS OF BIODIVERSITY AND DECLINE IN POPULATION ABUNDANCE CUSTOMARILY ASSOCIATED WITH INCREASING LEVELS OF IMPERVIOUS SURFACE AND FRAGMENTATION OF NATIVE HABITATS. SOME STUDIES SUGGEST THAT FAUNAL SPECIES FROM OPEN HABITATS, AND WITH HIGHER ABUNDANCE IN NATURAL ENVIRONMENTS, SEEM MORE LIKELY TO TOL…		UNIV FED PARAIBA, DEPT ENGN & MEIO AMBIENTE, RIO TINTO, BRAZIL.; UNIV TORONTO MISSISSAUGA, CTR URBAN ENVIROM, MISSISSAUGA, ON, CANADA.;	ATLANTIC FOREST; LAND COVER; REPTILES; SYNURBIC SPECIES; URBAN ECOLOGY	10.1002/ece3.5518	ARTICLE			SPECIES RICHNESS; URBAN; ECOLOGY; FOREST; BIODIVERSITY; BIRDS; CONSERVATION; PERFORMANCE; INFERENCE; RESPONSES	ECOL. EVOL.	ENGLISH	32128113	WILEY	2020	DE ANDRADE, AC (AUTOR CORRESPONDENTE), UNIV FED PARAIBA, DEPT ENGN & MEIO AMBIENTE, RIO TINTO, BRAZIL.	2045-7758	ECOLOGY AND EVOLUTION	4	METROPOLITAN LIZARDS URBANIZATION GRADIENT AND THE DENSITY OF LAGARTIXAS TROPIDURUS HISPIDUS IN A TROPICAL CITY	10	Joao Pessoa, Brazil	-7.11525	-34.861	-	-
CÉZAR K;FRANKLIN E;PINTO C	POLLINATOR RICHNESS, ABUNDANCE AND VISITATION FREQUENCY MAY BE AFFECTED BY THE ABUNDANCE OF FLORAL RESOURCES AND ABIOTIC FACTORS, INFLUENCING PLANT REPRODUCTIVE SUCCESS. WE ANALYSED WHETHER THE DIVERSITY, ABUNDANCE AND FREQUENCY OF BUTTERFLY VISITATION ON LANTANA CAMARA VARY ACROSS THE YEAR IN A TROPICAL URBAN LANDSCAPE AND WHETHER THIS VARIATION IN BUTTERFLY COMMUNITY INFLUENCES PLANT'S REPRODUC…		ENTOMOLOGY GRADUATE PROGRAM, NATIONAL INSTITUTE FOR AMAZONIA RESEARCH, AV. ANDRÉ ARAÚJO, 2936, AM, MANAUS, 69067-375, BRAZIL; BIODIVERSITY COORDINATION, NATIONAL INSTITUTE FOR AMAZONIA RESEARCH, AV. ANDRÉ ARAÚJO, 2936, MANAUS, 69067-375, BRAZIL; DEPARTMENT OF FUNDAMENTAL CHEMISTRY, CENTER FOR EXACT AND NATURAL SCIENCES, FEDERAL UNIVERSITY OF PERNAMBUCO, AV. PROF. MORAES REGO, RECIFE, 50670-901, B…	AMAZON; FRUIT SET; LEPIDOPTERA; PLANT-POLLINATOR INTERACTIONS; VERBENACEAE	10.2478/eko-2022-0006	ARTICLE		NA NA NA	ABIOTIC FACTOR; AUTOGAMY; BUTTERFLY; INSECT; TEMPORAL VARIATION	EKOL. BRATISLAVA	ENGLISH		SCIENDO	2022	CÉZAR, K.; ENTOMOLOGY GRADUATE PROGRAM, AV. ANDRÉ ARAÚJO, 2936 AM, BRAZIL; EMAIL: KELVE.F@GMAIL.COM	1335342X	EKOLOGIA BRATISLAVA	0	TEMPORAL VARIATION IN POLLINATORS VISITATION OF LANTANA CAMARA IN A TROPICAL URBAN LANDSCAPE DOES BUTTERFLY ABUNDANCE AND RICHNESS DRIVE THE FRUIT SET	41	Manaus, Brazil	-3.11903	-60.0217	-	-
FRAGATA M;BACCARO F;GONCALVES A;BORGES S	THE EFFECTS OF URBANIZATION ON BIODIVERSITY HAD BEEN STUDIED MAINLY IN NORTHERN HEMISPHERE. THEREFORE, BIODIVERSITY ANALYSIS IN TROPICAL CITIES IS URGENTLY REQUIRED FOR A FULL UNDERSTANDING OF THE HOW ANIMAL AND PLANT COMMUNITIES REACT TO URBANIZATION. PARROTS ARE ICONIC TROPICAL BIRDS AND CONSIDERED PARTICULARLY VULNERABLE TO URBANIZATION IMPACTS. HERE WE DESCRIBE PATTERNS OF DIVERSITY AND ABUND…		UNIV FED AMAZONAS UFAM, INST CIENCIAS BIOL, PROGRAMA POSGRAD ZOOL, MANAUS, AMAZONAS, BRAZIL.; UNIV FED AMAZONAS UFAM, DEPT BIOL, AV GEN RODRIGO O JORDAO RAMOS 3000, BR-69077000 MANAUS, AMAZONAS, BRAZIL.; INST NACL PESQUISAS AMAZONIA INPA, PROGRAMA POSGRAD BIOL ECOL, MANAUS, AMAZONAS, BRAZIL.;	TROPICAL CITIES; GREEN AREAS; AMAZON BIRDS; URBAN BIRDS; PARROT CONSERVATION	10.1007/s11252-022-01209-8	ARTICLE	FUNDACAO DE AMPARO A PESQUISA DO AMAZONAS (FAPEAM)	FIRST AUTHOR RECEIVED GRANT FROM FUNDACAO DE AMPARO A PESQUISA DO AMAZONAS (FAPEAM).	FUNCTIONAL DIVERSITY; URBANIZATION; CONSERVATION; LANDSCAPE; HABITAT; CITIES; FOREST; SPACE; BIRDS; DIET	URBAN ECOSYST.	ENGLISH		SPRINGER	2022	BORGES, SH (AUTOR CORRESPONDENTE), UNIV FED AMAZONAS UFAM, INST CIENCIAS BIOL, PROGRAMA POSGRAD ZOOL, MANAUS, AMAZONAS, BRAZIL.; BORGES, SH (AUTOR CORRESPONDENTE), UNIV FED AMAZONAS UFAM, DEPT BIOL, AV GEN RODRIGO O JORDAO RAMOS 3000, BR-69077000 MANAUS, AMAZONAS, BRAZIL.	1083-8155	URBAN ECOSYSTEMS	0	LIVING IN A TROPICAL CONCRETE JUNGLE DIVERSITY AND ABUNDANCE VARIATION IN A PARROT ASSEMBLAGE AVES PSITTACIDAE OF A MAJOR AMAZONIAN CITY	25	Manaus, Brazil	-3.11903	-60.0217	-	-
LIPPERT M;LANSAC-TOHA F;MEIRA B;VELHO L;LANSAC-TOHA F	WE AIMED TO INVESTIGATE SPATIAL AND TEMPORAL SCALES, ABUNDANCE, AND FACTORS THAT STRUCTURE THE COMMUNITIES OF PROTOZOANS IN A TROPICAL URBAN STREAM. METHODS: SAMPLES OF WATER FOR ANALYSIS OF BIOLOGICAL COMMUNITIES (TESTATE AMOEBAE, CILIATES AND BACTERIA) AND LIMNOLOGICAL VARIABLES WERE TAKEN IN THE MANDACARU STREAM LOCATED IN THE CONSERVATION UNIT OF PARQUE DO CINQUENTENARIO, IN THE CITY OF MARIN…		UNIV ESTADUAL MARINGA UEM, PROGRAMA POSGRAD BIOL COMPARADA, AV COLOMBO 5790, BR-87020900 MARINGA, PARANA, BRAZIL.; UNIV ESTADUAL MARINGA UEM, NUCLEO PESQUISAS LIMNOL ICTIOL & AQUICULTURA NUPE, PROGRAMA POSGRAD ECOL AMBIENTES AQUAT CONTINENTAI, AV COLOMBO 5790, BR-87020900 MARINGA, PARANA, BRAZIL.; CTR UNIV CESUMAR UNICESUMAR, INST CESUMAR CIENCIA TECNOL & INOVACAO ICETI, AV GUEDNER 1610, BR-87050…	PROTIST; PLANKTON; WATER QUALITY; TESTATE AMOEBAE; CILIATES	10.1590/1519-6984.222607	ARTICLE	CAPES; CNPQ	WE WOULD LIKE TO THANK NUPELIA/PEA/PGB/UEM FOR LOGISTICAL SUPPORT. WE WOULD LIKE TO THANK CAPES AND CNPQ FOR FELLOWSHIPS. WE ALSO THANK GEZIELE MUCIO ALVES, LEILANE SCHWIND, DIOGO CASTANHO AMARAL, MARIA DO CARMO ROBERTO, CARLOS EDUARDO AGUIAR SOARES AND LISIANE HOFF FOR THEIR ASSISTANCE IN FIELD SURVEYS, BIOLOGICAL MATERIAL ANALYZES AND LABORATORY PROCEDURES AS WELL AS FOR VALUABLE SUGGESTIONS.	PARANA RIVER FLOODPLAIN; AMEBAS RHIZOPODEA-SARCODINA; WATER-QUALITY; PROTOZOAN COMMUNITIES; DIFFERENT HABITATS; FISH COMMUNITIES; TROPHIC STATE; MATO-GROSSO; BASIN; ASSEMBLAGES	BRAZ. J. BIOL.	ENGLISH	31800767	INT INST ECOLOGY	2020	LANSAC-TOHA, FA (AUTOR CORRESPONDENTE), UNIV ESTADUAL MARINGA UEM, NUCLEO PESQUISAS LIMNOL ICTIOL & AQUICULTURA NUPE, PROGRAMA POSGRAD ECOL AMBIENTES AQUAT CONTINENTAI, AV COLOMBO 5790, BR-87020900 MARINGA, PARANA, BRAZIL.	1519-6984	BRAZILIAN JOURNAL OF BIOLOGY	1	STRUCTURE AND DYNAMICS OF THE PROTOPLANKTON COMMUNITY IN AN ENVIRONMENTALLY PROTECTED URBAN STREAM	80	Maringá, Brasil	-23.4273	-51.937	-	-
MAY-ITZA W;DE A C;PAXTON R;MOO-VALLE H;MEDINA-MEDINA L;QUEZADA-EUAN J	IN TEMPERATE REGIONS OF THE WORLD DOMINATED BY INTENSIVE AGRICULTURE, CITIES HARBOR A RICH DIVERSITY AND ABUNDANCE OF BEE SPECIES, OFTEN EXCEEDING THOSE OF THE RURAL ENVIRONMENT. IN LESS INDUSTRIALIZED TROPICAL COUNTRIES, IN CONTRAST, STRESSFUL CONDITIONS MAY EXIST IN CITIES FOR BEES WITH PERENNIAL COLONIES SUCH AS STINGLESS BEES BECAUSE OF THE LACK OF RESOURCES SUCH AS AMENITY GREEN SPACES (FLOW…		UNIV AUTONOMA YUCATAN, DEPT APICULTURA TROP, CAMPUS CIENCIAS BIOL & AGR,KM 15-5 CARR, MERIDA, MEXICO.; MARTIN LUTHER UNIV HALLE WITTENBERG, INST BIOL, D-06099 HALLE, SAALE, GERMANY.;	URBANIZATION; DEFORESTATION; MICROSATELLITE; HETEROZYGOSITY; MELIPONINI; INBREEDING	10.1007/s13592-021-00862-w	ARTICLE	PROJECTS MUTUAL-FONCICYT; SEP-CONACYT [103341]; CONACYT [237532]; SAGARPA-CONACYT [291333]	THIS PROJECT WAS SUPPORTED BY PROJECTS MUTUAL-FONCICYT, SEP-CONACYT 103341, CONACYT 237532, AND SAGARPA-CONACYT 291333.DATA AVAILABILITY	PRIMITIVELY EUSOCIAL BEE; SEX DETERMINATION; BEECHEII APIDAE; BIOLOGY; DIFFERENTIATION; CONSERVATION; POPULATIONS; RESERVES; SUPPORT; COLONY	APIDOLOGIE	ENGLISH		SPRINGER FRANCE	2021	QUEZADA-EUAN, JJG (AUTOR CORRESPONDENTE), UNIV AUTONOMA YUCATAN, DEPT APICULTURA TROP, CAMPUS CIENCIAS BIOL & AGR,KM 15-5 CARR, MERIDA, MEXICO.	0044-8435	APIDOLOGIE	4	STINGLESS BEES IN URBAN AREAS LOW BODY SIZE AND HIGH FREQUENCY OF DIPLOID MALES AT MATING CONGREGATIONS OF NANNOTRIGONA PERILAMPOIDES HYMENOPTERA MELIPONINI IN MERIDA YUCATAN MEXICO	52	Merida, Mexico	20.9678	-89.6243	-	-
LEE M;PEABOTUWAGE I;GU H;ZHOU W;GOODALE E	A MAJORITY OF URBAN AVIAN RESEARCH HAS CONCENTRATED ON URBANIZATION INTENSITY AND VEGETATION CHARACTERISTICS. HOWEVER, OTHER BUILT-UP AND NON-BUILT-UP CHARACTERISTICS THAT CAN REPRESENT ENVIRONMENTAL GRADIENTS WITHIN A CITY ARE LESS CONSIDERED, ESPECIALLY IN SUBTROPICAL/TROPICAL CITIES OF ASIA. DURING 2015-2016, WE EXAMINED HOW INFRA-URBAN ENVIRONMENTAL CHARACTERISTICS INFLUENCED AVIAN SPECIES RI…		GUANGXI UNIV, COLL FORESTRY, GUANGXI KEY LAB FOREST ECOL & CONSERVAT, 100 DAXUE RD, NANNING 530004, GUANGXI, PEOPLES R CHINA.; GUANGDONG INST APPL BIOL RESOURCES, 105 XINGANG WEST RD, GUANGZHOU 510260, GUANGDONG, PEOPLES R CHINA.;	HUMAN DISTURBANCE; INTRA-URBAN FEATURE; OPEN GREEN SPACE; OCCUPANCY MODEL; URBAN FARM	10.1016/j.baae.2019.08.003	ARTICLE	SPECIAL TALENT RECRUITMENT PROGRAM OF GUANGXI UNIVERSITY	THIS PROJECT WAS SUPPORTED BY THE SPECIAL TALENT RECRUITMENT PROGRAM OF GUANGXI UNIVERSITY TO EG. WE WOULD LIKE TO THANK NUMEROUS UNDERGRADUATE STUDENTS FOR THEIR HELP, AND LOCAL RESIDENTS FOR ALLOWING US TO CONDUCT OUR SURVEYS IN THEIR BUILDING COMPLEXES.	ANTHROPOGENIC NOISE; BIRD POPULATIONS; URBAN PARKS; LAND-USE; DIVERSITY; URBANIZATION; VEGETATION; FORESTS; AREAS; CONSERVATION	BASIC APPL. ECOL.	ENGLISH		ELSEVIER GMBH	2019	LEE, MB (AUTOR CORRESPONDENTE), GUANGXI UNIV, COLL FORESTRY, GUANGXI KEY LAB FOREST ECOL & CONSERVAT, 100 DAXUE RD, NANNING 530004, GUANGXI, PEOPLES R CHINA.; LEE, MB (AUTOR CORRESPONDENTE), GUANGDONG INST APPL BIOL RESOURCES, 105 XINGANG WEST RD, GUANGZHOU 510260, GUANGDONG, PEOPLES R CHINA.	1439-1791	BASIC AND APPLIED ECOLOGY	5	FACTORS AFFECTING AVIAN SPECIES RICHNESS AND OCCUPANCY IN A TROPICAL CITY IN SOUTHERN CHINA IMPORTANCE OF HUMAN DISTURBANCE AND OPEN GREEN SPACE	39	Nanning, China	22.8219	108.318	-	-
OLIVEIRA I;LION M;CARDOSO M	THE EXTENT OF BIODIVERSITY IN THE URBAN SETTING IS RELATED TO THE DEGREE OF LAND TRANSFORMATION AND THE RELATIVE QUANTITY OF GREEN SPACES IN THE CITY. LARGE TRACTS OF GREEN SPACES MAY HARBOR SPECIES AND SERVE AS SOURCES OF COLONISTS TO OTHER URBAN SPACES, BUT THE DEGREE TO WHICH THIS OCCURS IS NOT WELL KNOWN, PARTICULARLY IN CITIES IN THE TROPICS. HERE WE EVALUATE IF A LARGE URBAN GREEN SPACE (DU…		UNIV FED RIO GRANDE NORTE UFRN, DEPT ECOL, BR-59072970 NATAL, RN, BRAZIL.;	LEPIDOPTERA; URBANIZATION; HOMOGENIZATION; ENVIRONMENTAL FILTER; BIODIVERSITY LOSS; WILDLIFE REFUGE	10.1016/j.landurbplan.2018.09.002	ARTICLE	CAPES; CNPQ; CNPQ [400242/2014-1, 306985/2013-6]; BRAZILIAN NETWORK FOR RESEARCH AND CONSERVATION OF LEPIDOPTERANS (REDELEP) [563332/2010-7]; UNIVERSITY AFFAIRS FOR EXTENSION	WE WOULD LIKE TO THANK MIRIAM PINTO, ALEXANDRE FADIGAS, DANILO RIBEIRO, JULIA VERBA, AND AN ANONYMOUS REVIEWER FOR COMMENTS ON THE MANUSCRIPT AND FOR IMPROVING IT. THIS STUDY WAS FIRST DEBATED WITH WOLFGANG WEISSER (TECHNISCHES UNIVERSITAT MUNCHEN) AND WE THANK HIM FOR DISCUSSIONS ON URBAN ECOLOGY AND THE TUM-UFRN PARTNERSHIP FOR A TECHNICAL VISIT BY MZC TO GERMANY. WE THANK THE MUNICIPAL SECRETA…	BETA DIVERSITY; LAND-USE; BIOTIC HOMOGENIZATION; SPECIES RICHNESS; CONSERVATION; LANDSCAPE; EXTINCTION; COMPONENTS; DYNAMICS; GREEN	LANDSC. URBAN PLAN.	ENGLISH		ELSEVIER SCIENCE BV	2018	OLIVEIRA, IF (AUTOR CORRESPONDENTE), UNIV FED RIO GRANDE NORTE UFRN, DEPT ECOL, BR-59072970 NATAL, RN, BRAZIL.	0169-2046	LANDSCAPE AND URBAN PLANNING	6	A PLAZA TOO FAR HIGH CONTRAST IN BUTTERFLY BIODIVERSITY PATTERNS BETWEEN PLAZAS AND AN URBAN RESERVE IN BRAZIL	180	Natal, Brazil	-5.77926	-35.2009	-	-
SILVA J;DE O M;OLIVEIRA W;BORGES L;CRUZ-NETO O;LOPES A	URBAN ECOSYSTEMS PROVIDE GREEN LANDSCAPES THAT ARE IMPORTANT TO GLOBAL BIODIVERSITY CONSERVATION. IN TROPICAL URBAN ECOSYSTEMS, EXOTIC PLANTS ARE WIDELY USED IN LANDSCAPING AND THIS CAN HAVE SEVERAL NEGATIVE EFFECTS ON THE NATIVE PLANT AND POLLINATOR COMMUNITIES. HERE, WE AIMED TO INVESTIGATE THE ORIGIN (NATIVE OR EXOTIC TO BRAZIL, AND NATIVE OR EXOTIC TO THE PHYTOGEOGRAPHIC DOMINIUM WHERE THE UR…	126659	UNIV FED PERNAMBUCO, CTR BIOCIENCIAS, DEPT BOT, BR-50670901 RECIFE, PE, BRAZIL.; UNIV FED PERNAMBUCO, CTR BIOCIENCIAS, PROGRAMA POSGRAD BIOL VEGETAL, BR-50670901 RECIFE, PE, BRAZIL.; UNIV FED PARAIBA, CTR CIENCIAS AGR, DEPT CIENCIAS BIOL, BR-58397000 AREIA, PB, BRAZIL.;	NATIVE FLORA; REPRODUCTIVE PHENOLOGY; TREES; TROPICAL URBAN ECOSYSTEMS; URBAN BIODIVERSITY	10.1016/j.ufug.2020.126659	ARTICLE	FUNDACAO DE AMPARO A CIENCIA E TECNOLOGIA DO ESTADO DE PERNAMBUCO (FACEPE) [IBPG0420-2.03/14, IBPG-0774-2.03/13, BCT-0208-2.05/17]; CONSELHO NACIONAL DE DESENVOLVIMENTO CIENTIFICO E TECNOLOGICO (CNPQ) [481755/2013-6, 308832/2014-0]; COORDENACAO DE APERFEICOAMENTO DE PESSOAL DE NIVEL SUPERIOR (CAPES) [001]	THIS WORK WAS SUPPORTED BY FUNDACAO DE AMPARO A CIENCIA E TECNOLOGIA DO ESTADO DE PERNAMBUCO (FACEPE): GRANTS TO MTPO (IBPG0420-2.03/14), JLSS (IBPG-0774-2.03/13) AND OCN (BCT-0208-2.05/17); CONSELHO NACIONAL DE DESENVOLVIMENTO CIENTIFICO E TECNOLOGICO (CNPQ): FOR FINANCIAL SUPPORT FOR RESEARCH TO AVL (#481755/2013-6 AND #308832/2014-0) AND GRANT TO WO (PIBIC/UFPE/CNPQ, UNDERGRADUATE SCHOLARSHIP)…	ALIEN PLANT INVASIONS; LAND-USE; SEED DISPERSAL; TRAITS; CITY; BIODIVERSITY; CAATINGA; HISTORY; FLORA; CONSERVATION	URBAN FOR. URBAN GREEN.	ENGLISH		ELSEVIER GMBH	2020	LOPES, AV (AUTOR CORRESPONDENTE), UNIV FED PERNAMBUCO, CTR BIOCIENCIAS, DEPT BOT, BR-50670901 RECIFE, PE, BRAZIL.	1618-8667	URBAN FORESTRY & URBAN GREENING	10	HIGH RICHNESS OF EXOTIC TREES IN TROPICAL URBAN GREEN SPACES REPRODUCTIVE SYSTEMS FRUITING AND ASSOCIATED RISKS TO NATIVE SPECIES	50	Recife, Brazil	-8.05224	-34.9286	-	-
OLIVEIRA M;SILVA J;CRUZ-NETO O;BORGES L;GIRAO L;TABARELLI M;LOPES A	URBAN GREEN SPACES HAVE GAINED NOTORIETY IN RECENT YEARS, AS THEY HAVE BEEN ARGUED TO PLAY AN IMPORTANT ROLE IN SUPPORTING NATIVE BIODIVERSITY, ECOSYSTEM SERVICES AND HUMAN WELL-BEING. HOWEVER, SUCH A PROMISING PERSPECTIVE IS POORLY INVESTIGATED IN THE TROPICAL CONTEXT. HERE WE EXAMINE THE ROLE PLAYED BY URBAN GREEN AREAS IN A MAJOR CITY (RECIFE-BRAZIL) AS A REPOSITORY FOR ATLANTIC FOREST BIODIVE…	126779	UNIV FED PERNAMBUCO, CTR BIOCIENCIAS, PROGRAMA POSGRAD BIOL VEGETAL, BR-50670901 RECIFE, PE, BRAZIL.; UNIV FED PERNAMBUCO, CTR BIOCIENCIAS, DEPT BOT, BR-50670901 RECIFE, PE, BRAZIL.; UNIV FED PARAIBA, CTR CIENCIAS AGR, DEPT CIENCIAS BIOL, BR-58397000 AREIA, PARAIBA, BRAZIL.;	EXOTIC PLANTS; FLORAL TRAITS; FUNCTIONAL DIVERSITY; NATIVE PLANTS; POLLINATION; TROPICAL URBAN ECOSYSTEM	10.1016/j.ufug.2020.126779	ARTICLE	CONSELHO NACIONAL DE DESENVOLVIMENTO CIENTIFICO E TECNOLOGICO - CNPQ [481755/2013-6, 308832/2014-0]; COORDENACAO DE APERFEICOAMENTO DE PESSOAL DE NIVEL SUPERIOR - CAPES [001, APQ-0789-2.05/16]; FUNDACAO DE AMPARO A CIENCIA E TECNOLOGIA DO ESTADO DE PERNAMBUCO - FACEPE [IBPG-0774-2.03/13, IBPG-0420-2.03/14, BCT-0208-2.05/17]	THIS WORK WAS SUPPORTED BY THE CONSELHO NACIONAL DE DESENVOLVIMENTO CIENTIFICO E TECNOLOGICO - CNPQ (GRANTS TO AVL: CNPQ/CHAMADA UNIVERSAL #481755/2013-6 AND PQ/CNPQ #308832/2014-0 AND TO MT: PQ/CNPQ), COORDENACAO DE APERFEICOAMENTO DE PESSOAL DE NIVEL SUPERIOR - CAPES (GRANT CODE 001 AWARDED TO MTPO, JLSS, AVL, MT AND #APQ-0789-2.05/16 TO OCN), AND FUNDACAO DE AMPARO A CIENCIA E TECNOLOGIA DO ES…	RAIN-FOREST; FUNCTIONAL DIVERSITY; BIODIVERSITY CONSERVATION; ECOSYSTEM SERVICES; EXOTIC PLANTS; DRY FOREST; LAND-USE; URBANIZATION; FRAGMENTATION; POLLINATION	URBAN FOR. URBAN GREEN.	ENGLISH		ELSEVIER GMBH	2020	LOPES, AV (AUTOR CORRESPONDENTE), UNIV FED PERNAMBUCO, CTR BIOCIENCIAS, DEPT BOT, BR-50670901 RECIFE, PE, BRAZIL.	1618-8667	URBAN FORESTRY & URBAN GREENING	5	URBAN GREEN AREAS RETAIN JUST A SMALL FRACTION OF TREE REPRODUCTIVE DIVERSITY OF THE ATLANTIC FOREST	54	Recife, Brazil	-8.05224	-34.9286	-	-
ALVES-DE-SOUZA C;BENEVIDES T;SANTOS J;VON D P;GUILLOU L;MENEZES M	THE TEMPORAL BETA DIVERSITY OF SMALL EUKARYOTIC PHYTOPLANKTON IN A TROPICAL URBAN COASTAL LAGOON (RODRIGO DE FREITAS LAGOON, BRAZIL) WAS CHARACTERIZED THROUGHOUT TWO ANNUAL CYCLES (2012-2103) WITH TWICE-WEEKLY SAMPLING. SMALL EUKARYOTIC PHYTOPLANKTON (< 20 MU M) WERE VERY ABUNDANT (ABOVE 1 X 10(3) AND UP TO 6.2 X 10(5) CELLS ML(-1)). SMALL EUKARYOTES WERE ALSO THE MOST DIVERSE PHYTOPLANKTON GROUP…		UNIV FED RIO DE JANEIRO, MUSEU NACL, DEPT BOT, LAB FICOL, QUINTA BOA VISTA S-N, BR-20940040 RIO DE JANEIRO, RJ, BRAZIL.; PONTIFICIA UNIV CATOLICA CHILE, INST MILENIO OCEANOG, FAC CIENCIAS BIOL, DEPT ECOL, AVE LIBERTADOR BERNARDO OHIGGINS 340, SANTIAGO, CHILE.; SORBONNE UNIV, STN BIOL ROSCOFF, EVOLUTIONARY BIOL & ECOL ALGAE, UMI 3614,CNRS,UPMC,PUCCH,UACH, ROSCOFF, FRANCE.; CNRS, LAB ADAPTAT & DIVE…	POPULATION DYNAMICS; TEMPORAL SPECIES TURNOVER; PICOPHYTOPLANKTON; NANOPHYTOPLANKTON; COASTAL SYSTEMS	10.1093/plankt/fbx026	ARTICLE	RESEARCH SUPPORT FOUNDATION OF THE STATE OF RIO DE JANEIRO (FAPERJ) [BIOTA-FAPERJ E-26/111.401/2012]; BRAZILIAN NATIONAL COUNCIL FOR SCIENTIFIC AND TECHNOLOGICAL DEVELOPMENT (CNPQ) [14/2014 446687/2014-6, PDJ/CNPQ503443/2012-3]; INTERNATIONAL RESEARCH NETWORK "DIVERSITY, EVOLUTION AND BIOTECHNOLOGY OF MARINE ALGAE" [GDRI] [0803]	THIS WORK WAS SUPPORTED BY THE RESEARCH SUPPORT FOUNDATION OF THE STATE OF RIO DE JANEIRO (FAPERJ) [BIOTA-FAPERJ E-26/111.401/2012 TO MM]; THE BRAZILIAN NATIONAL COUNCIL FOR SCIENTIFIC AND TECHNOLOGICAL DEVELOPMENT (CNPQ) [14/2014 446687/2014-6, PDJ/CNPQ503443/2012-3 TO CAS]; AND THE INTERNATIONAL RESEARCH NETWORK "DIVERSITY, EVOLUTION AND BIOTECHNOLOGY OF MARINE ALGAE" [GDRI NO 0803 TO LG AND CA…	PLANKTONIC FOOD-WEB; EAST PACIFIC-OCEAN; AUREOCOCCUS-ANOPHAGEFFERENS; GENETIC DIVERSITY; VARIABILITY; MORTALITY; EMPHASIS; DYNAMICS; AMMONIUM; NITRATE	J. PLANKTON RES.	ENGLISH		OXFORD UNIV PRESS	2017	ALVES-DE-SOUZA, C (AUTOR CORRESPONDENTE), UNIV FED RIO DE JANEIRO, MUSEU NACL, DEPT BOT, LAB FICOL, QUINTA BOA VISTA S-N, BR-20940040 RIO DE JANEIRO, RJ, BRAZIL.; ALVES-DE-SOUZA, C (AUTOR CORRESPONDENTE), UNIV NORTH CAROLINA WILMINGTON, MARBIONC CREST RES PK,5600 MARVIN K MOSS LANE, WILMINGTON, NC 28409 USA.	0142-7873	JOURNAL OF PLANKTON RESEARCH	15	DOES ENVIRONMENTAL HETEROGENEITY EXPLAIN TEMPORAL BETA DIVERSITY OF SMALL EUKARYOTIC PHYTOPLANKTON EXAMPLE FROM A TROPICAL EUTROPHIC COASTAL LAGOON	39	Rio de Janeiro, Brazil	-22.9068	-43.1729	-	-
DE J R;RAMIREZ A	URBANIZATION IS DEGRADING STREAM ECOSYSTEMS WORLDWIDE. TROPICAL ISLAND STREAMS MAY RESPOND TO URBANIZATION DIFFERENTLY THAN TEMPERATE STREAMS BECAUSE OF THEIR OVERALL CLIMATE DIFFERENCES, AND THEY MAY RESPOND DIFFERENTLY THAN CONTINENTAL TROPICAL URBAN STREAMS BECAUSE OF THEIR REDUCED BIOLOGICAL DIVERSITY AND SHORT DRAINAGES. WE CHARACTERIZED THE PHYSICOCHEMISTRY, PHYSICAL HABITAT, AND MACROINVER…		UNIV PUERTO RICO, INST TROP ECOSYST STUDIES, SAN JUAN, PR 00936 USA.;	URBAN STREAM ECOLOGY; TROPICAL; MACROINVERTEBRATES; RIPARIAN BUFFERS; LAND USE; WATER PHYSICOCHEMISTRY	10.1899/10-081.1	ARTICLE	LUQUILLO LONG-TERM ECOLOGICAL RESEARCH PROGRAM; CENTER FOR APPLIED TROPICAL ECOLOGY AND CONSERVATION (CATEC) AT THE UNIVERSITY OF PUERTO RICO; US FOREST SERVICE INTERNATIONAL INSTITUTE OF TROPICAL FORESTRY	OUR STUDY DESIGN AND THE RESULTING MANUSCRIPT WERE GREATLY IMPROVED BY COMMENTS FROM N. BROKAW, C. COLON-GAUD, J. KOMINOSKI, T. MOULTON, J. R. ORTIZ-ZAYAS, G. SMALL, J. THOMLINSON, AND AN ANONYMOUS REFEREE. WE THANK W. H. MCDOWELL FOR ANALYZING WATER SAMPLES AND FOR PROVIDING INPUT ON THEIR INTERPRETATION. AURELIO CASTRO AND CORALYS ORTIZ PROVIDED GREAT HELP WITH OUR LANDUSE ANALYSIS. SUPPORT FOR…	IMPERVIOUS-SURFACE-AREA; LAND-USE; BIOTIC INTEGRITY; BENTHIC MACROINVERTEBRATES; QUALITY; COMMUNITIES; CONSERVATION; BIODIVERSITY; CATCHMENT; ECOLOGY	J. N. AM. BENTHOL. SOC.	ENGLISH		NORTH AMER BENTHOLOGICAL SOC	2011	DE JESUS-CRESPO, R (AUTOR CORRESPONDENTE), UNIV GEORGIA, ODUM SCH ECOL, ATHENS, GA 30602 USA.	0887-3593	JOURNAL OF THE NORTH AMERICAN BENTHOLOGICAL SOCIETY	39	EFFECTS OF URBANIZATION ON STREAM PHYSICOCHEMISTRY AND MACROINVERTEBRATE ASSEMBLAGES IN A TROPICAL URBAN WATERSHED IN PUERTO RICO	30	San Juan, Puerto Rico	18.4655	-66.1057	-	-
PEREZ-VILLALONA H;CORNWELL J;ORTIZ-ZAYAS J;CUEVAS E	DIRECT MEASUREMENTS OF NET N-2 PRODUCTION, OXYGEN, AND INORGANIC NUTRIENT FLUXES AT THE SEDIMENT-WATER INTERFACE WERE CONDUCTED IN THE SAN JOS, LAGOON (SJL), A TROPICAL COASTAL LAGOON LOCATED AT THE SAN JUAN BAY ESTUARY, PUERTO RICO, THAT IS HEAVILY IMPACTED BY ANTHROPOGENIC ACTIVITIES. SEDIMENT OF THE SJL HAD HIGH ORGANIC MATTER (AVERAGE = 16.7 %; SD = 9.0), PORE WATER AMMONIUM (541 MU M +/- 422…		UNIV PUERTO RICO, DEPT BIOL, SAN JUAN, PR 00936 USA.; UNIV MARYLAND, CTR ENVIRONM SCI, HORN POINT LAB, CAMBRIDGE, MD 21613 USA.; UNIV PUERTO RICO, DEPT ENVIRONM SCI, SAN JUAN, PR 00931 USA.; UNIV PUERTO RICO, CTR APPL TROP ECOL & CONSERVAT, SAN JUAN, PR 00931 USA.; UNIV PUERTO RICO, DEPT BIOL, SAN JUAN, PR 00931 USA.;	SEDIMENT N-2 PRODUCTION; NUTRIENT CYCLING; TROPICAL URBAN ESTUARY	10.1007/s12237-015-9953-3	ARTICLE	CENTER FOR APPLIED TROPICAL ECOLOGY AND CONSERVATION, UNIVERSITY OF PUERTO RICO, RIO PIEDRAS CAMPUS UNDER NATIONAL SCIENCE FOUNDATION [HRD-0734826]; LUQUILLO LONG TERM ECOLOGICAL RESEARCH PROGRAM, UNIVERSITY OF PUERTO RICO, RIO PIEDRAS CAMPUS UNDER THE NATIONAL SCIENCE FOUNDATION [DEB-0620910]; HORN POINT LABORATORY, UNIVERSITY OF MARYLAND CENTER FOR ENVIRONMENTAL SCIENCE UNDER NATIONAL SCIENCE F…	THIS RESEARCH WAS A COLLABORATIVE WORK FINANCIALLY SUPPORTED BY CENTER FOR APPLIED TROPICAL ECOLOGY AND CONSERVATION, UNIVERSITY OF PUERTO RICO, RIO PIEDRAS CAMPUS, UNDER THE NATIONAL SCIENCE FOUNDATION GRANT HRD-0734826, LUQUILLO LONG TERM ECOLOGICAL RESEARCH PROGRAM, UNIVERSITY OF PUERTO RICO, RIO PIEDRAS CAMPUS UNDER THE NATIONAL SCIENCE FOUNDATION GRANT DEB-0620910, AND HORN POINT LABORATORY,…	DISSIMILATORY NITRATE REDUCTION; ORGANIC-MATTER MINERALIZATION; RIVER COLNE ESTUARY; NITROGEN FLUXES; BENTHIC METABOLISM; OXYGEN-CONSUMPTION; CHESAPEAKE BAY; COASTAL LAGOON; AMMONIUM DNRA; INORGANIC NITROGEN	ESTUARIES COASTS	ENGLISH		SPRINGER	2015	PEREZ-VILLALONA, H (AUTOR CORRESPONDENTE), UNIV MARYLAND, CTR ENVIRONM SCI, HORN POINT LAB, CAMBRIDGE, MD 21613 USA.	1559-2723	ESTUARIES AND COASTS	17	SEDIMENT DENITRIFICATION AND NUTRIENT FLUXES IN THE SAN JOS LAGOON A TROPICAL LAGOON IN THE HIGHLY URBANIZED SAN JUAN BAY ESTUARY PUERTO RICO	38	San Juan, Puerto Rico	18.4655	-66.1057	-	-
WOLFF P;DEGREGORIO B;RODRIGUEZ-CRUZ V;MULERO-OLIVERAS E;SPERRY J	URBANIZATION HAS PROFOUND EFFECTS ON THE PRESENCE AND DISTRIBUTION OF WILDLIFE SPECIES. ALTHOUGH NUMEROUS STUDIES HAVE BEEN CONDUCTED TO INFORM OUR UNDERSTANDING OF THE EFFECTS OF URBANIZATION ON WILDLIFE, STUDIES OF URBAN WILDLIFE COMMUNITIES IN THE TROPICS ARE ESPECIALLY RARE. HERE, WE INVESTIGATED THE BIRD COMMUNITY ASSEMBLAGE AND DISTRIBUTION AT AN URBAN MILITARY INSTALLATION, FORT BUCHANAN, …	1940082918754777	US ARMY ENGINEER RES & DEV CTR, 2902 NEWMARK DR, CHAMPAIGN, IL 61822 USA.; SOL SOLUT LLC, SCOTTSDALE, AZ USA.; UNIV PUERTO RICO, RECINTO UNIV MAYAGUEZ, BIOL DEPT, MAYAGUEZ, PR USA.;	DISTANCE SAMPLING; HABITAT USE; NEOTROPICAL MIGRANTS; PUERTO RICO; URBANIZATION	10.1177/1940082918754777	ARTICLE	FORT BUCHANAN ENVIRONMENTAL DIVISION	THE AUTHOR(S) DISCLOSED RECEIPT OF THE FOLLOWING FINANCIAL SUPPORT FOR THE RESEARCH, AUTHORSHIP, AND/OR PUBLICATION OF THIS ARTICLE: THIS STUDY WAS FUNDED BY THE FORT BUCHANAN ENVIRONMENTAL DIVISION.	LAND-USE; FOREST FRAGMENTS; UNITED-STATES; URBANIZATION; DIVERSITY; VEGETATION; FUTURE; CONSERVATION; ORGANIZATION; LANDSCAPE	TROP. CONSERV. SCI.	ENGLISH		SAGE PUBLICATIONS INC	2018	WOLFF, PJ (AUTOR CORRESPONDENTE), US ARMY ENGINEER RES & DEV CTR, 2902 NEWMARK DR, CHAMPAIGN, IL 61822 USA.	1940-0829	TROPICAL CONSERVATION SCIENCE	7	BIRD COMMUNITY ASSEMBLAGE AND DISTRIBUTION IN A TROPICAL URBAN ECOSYSTEM OF PUERTO RICO	11	San Juan, Puerto Rico	18.4655	-66.1057	-	-
FRIESS D;RICHARDS D;PHANG V	TROPICAL FORESTED ECOSYSTEMS PROVIDE MULTIPLE ECOSYSTEM SERVICES TO RURAL AND URBAN LANDSCAPES, WITH CARBON STORAGE GAINING PARTICULAR ATTENTION. DEFORESTATION DUE TO RURAL-URBAN TRANSITIONS MAY LEAD TO A REDUCTION IN CARBON STORAGE ABILITY. COASTAL MANGROVE FORESTS ARE PARTICULARLY AT RISK FROM DEFORESTATION DUE TO THEIR LOCATION IN THE RAPIDLY URBANIZING COASTAL ZONE, AND THE CITY STATE OF SING…		NATL UNIV SINGAPORE, DEPT GEOG, 1 ARTS LINK, SINGAPORE 117570, SINGAPORE.;	ABOVE-GROUND BIOMASS; BLUE CARBON; CARBON EMISSIONS; REMOTE SENSING; SOIL CARBON	10.1007/s11252-015-0511-3	ARTICLE	NATIONAL UNIVERSITY OF SINGAPORE [R-109-000-141-133]; MINISTRY OF EDUCATION, GOVT. OF SINGAPORE [R-109-000-147-112]	THIS STUDY WAS FUNDED BY THE NATIONAL UNIVERSITY OF SINGAPORE (R-109-000-141-133) AND THE MINISTRY OF EDUCATION, GOVT. OF SINGAPORE (R-109-000-147-112). FIELD DATA COLLECTION WAS CONDUCTED UNDER RESEARCH PERMITS NP/RP936 AND NP/RP13-007A. WE THANK THE PARK MANAGERS AND STAFF AT SUNGEI BULOH WETLAND RESERVE, PASIR RIS AND PULAU UBIN FOR THEIR ASSISTANCE WITH SITE ACCESS AND DATA COLLECTION. WE ALS…	ECOSYSTEM SERVICE VALUES; ABOVEGROUND BIOMASS; COASTAL HABITATS; GROUND BIOMASS; BLUE CARBON; ALLOMETRY; PRODUCTIVITY; STOCKS	URBAN ECOSYST.	ENGLISH		SPRINGER	2016	FRIESS, DA; RICHARDS, DR (AUTOR CORRESPONDENTE), NATL UNIV SINGAPORE, DEPT GEOG, 1 ARTS LINK, SINGAPORE 117570, SINGAPORE.	1083-8155	URBAN ECOSYSTEMS	40	MANGROVE FORESTS STORE HIGH DENSITIES OF CARBON ACROSS THE TROPICAL URBAN LANDSCAPE OF SINGAPORE	19	Singapore	1.35208	103.82	-	-
WANG J;POH C;TAN C;LEE V;JAIN A;WEBB E	CONSERVATION OF FAUNAL DIVERSITY IN HIGHLY URBANIZED LANDSCAPES IS FACILITATED THROUGH THE INTEGRATION OF ANTHROPOGENIC AND NATURAL ELEMENTS IN URBAN GREEN SPACES. ROOF GARDENS HAVE THE POTENTIAL TO PROVIDE RESOURCES FOR URBAN WILDLIFE POPULATIONS, YET THEY TYPICALLY OFFER MARGINAL ECOLOGICAL CONDITIONS RELATIVE TO GROUND-LEVEL HABITAT SO IT IS NECESSARY TO IDENTIFY THE FACTORS ASSOCIATED WITH FO…	E01905	NATL PK BOARD, 1 CLUNY RD, SINGAPORE S259569, SINGAPORE.; NATL UNIV SINGAPORE, DEPT GEOG, 1 ARTS LINK, SINGAPORE S117570, SINGAPORE.; NATL UNIV SINGAPORE, DEPT BIOL SCI, SCI DR 4, SINGAPORE S117543, SINGAPORE.; BIRDLIFE INT ASIA, 354 TANGLIN RD, SINGAPORE S247672, SINGAPORE.;	CONSERVATION; GREEN ROOFS; RECONCILIATION ECOLOGY; URBAN ECOLOGY; URBAN GREEN SPACE	10.1002/ecs2.1905	ARTICLE	NATIONAL PARKS BOARD, SINGAPORE	THIS RESEARCH WAS FUNDED BY THE NATIONAL PARKS BOARD, SINGAPORE. THE AUTHORS WISH TO THANK JOLENE LIM AND ANISHA RAJBHANDARI FOR FIELDWORK ASSISTANCE; BENJAMIN LEE FOR ADVICE ON NOISE MEASUREMENTS; LOK YAN LING, TAY BEE CHOO, AND RACHEL TEO FOR INFORMATION ON ROOF GARDENS IN SINGAPORE; AND THE BUILDING OWNERS AND MANAGEMENT OF ALL OUR SITES FOR ACCESS TO THEIR ROOF GARDENS, INCLUDING ANG MO KIO T…	GREEN ROOFS; FUNCTIONAL DIVERSITY; COMMUNITY STRUCTURE; SPECIES RICHNESS; COMPACT CITY; CONSERVATION; HABITAT; URBANIZATION; LANDSCAPE; AREAS	ECOSPHERE	ENGLISH		WILEY	2017	WEBB, EL (AUTOR CORRESPONDENTE), NATL UNIV SINGAPORE, DEPT BIOL SCI, SCI DR 4, SINGAPORE S117543, SINGAPORE.	2150-8925	ECOSPHERE	30	BUILDING BIODIVERSITY DRIVERS OF BIRD AND BUTTERFLY DIVERSITY ON TROPICAL URBAN ROOF GARDENS	8	Singapore	1.35208	103.82	-	-
BELCHER R;CHISHOLM R	EFFECTIVE URBAN PLANNING DEPENDS ON KNOWING HOMEBUYERS' PREFERENCES FOR NEIGHBOURHOOD FEATURES THAT PROVIDE DIFFERENT AMENITIES, SUCH AS MANAGED PARKS AND TREES. AS THE EXPANSION OF TROPICAL URBAN AREAS INTO BIODIVERSITY HOTSPOTS IS PREDICTED TO MORE THAN DOUBLE BY 2030, KNOWING HOMEBUYERS UTILITY FROM DIFFERENT VEGETATION TYPES CAN CONTRIBUTE TO GLOBAL BIODIVERSITY CONSERVATION STRATEGIES. WE US…		NATL UNIV SINGAPORE, DEPT BIOL SCI, SINGAPORE 117543, SINGAPORE.; SINGAPORE ETH CTR, FUTURE CITIES LAB, ETH ZURICH, SINGAPORE, SINGAPORE.;	HEDONIC PRICING; TROPICAL VEGETATION; ECOSYSTEM SERVICE VALUATION; URBAN PLANNING; TROPICAL CITY STATE; PUBLIC HOUSING	10.1016/j.ecolecon.2018.03.012	ARTICLE	FUTURE CITIES LABORATORY AT THE SINGAPORE-ETH CENTRE [FI 370074016]	WE WOULD LIKE TO THANK ALEX THIAM KOON YEE FOR PROVIDING THE SINGAPORE VEGETATION MAP AND ADVICE ON ARCGIS. WE WOULD ALSO LIKE TO THANK FRANCESCA MCGRATH, DANIEL RICHARDS, ROMAN CARRASCO AND TAK FUNG FOR COMMENTS ON THE ANALYSIS AND MANUSCRIPT. R.N.B. WAS PARTIALLY SUPPORTED BY THE FUTURE CITIES LABORATORY AT THE SINGAPORE-ETH CENTRE, WHICH WAS ESTABLISHED COLLABORATIVELY BETWEEN ETH ZURICH AND S…	URBAN GREEN SPACE; ECOSYSTEM SERVICES; HOUSING PRICES; AMENITY VALUE; SPATIAL DEPENDENCE; TREE COVER; LANDSCAPE; FOREST; PARKS; MODEL	ECOL. ECON.	ENGLISH		ELSEVIER	2018	BELCHER, RN (AUTOR CORRESPONDENTE), SINGAPORE ETH CTR, FUTURE CITIES LAB, ETH ZURICH, SINGAPORE, SINGAPORE.	0921-8009	ECOLOGICAL ECONOMICS	24	TROPICAL VEGETATION AND RESIDENTIAL PROPERTY VALUE A HEDONIC PRICING ANALYSIS IN SINGAPORE	149	Singapore	1.35208	103.82	-	-
IZUDDIN M;SRIVATHSAN A;LEE A;YAM T;WEBB E	URBAN EXPANSION THREATENS BIODIVERSITY WORLDWIDE, THEREFORE URBAN SPACES NEED TO BE AMENABLE TO BIODIVERSITY CONSERVATION. ON TREES IN URBAN ENVIRONMENTS, NATURAL COLONISATION AND SUCCESSFUL TRANSLOCATION OF EPIPHYTIC ORCHIDS ARE NECESSARY TO ENHANCE URBAN BIODIVERSITY, AND DEPEND ON THE AVAILABILITY OF COMPATIBLE ORCHID MYCORRHIZAL FUNGI (OMF). HOWEVER, THE EXTENT OF OMF PRESENCE AND DISTRIBUTIO…	19528	NATL UNIV SINGAPORE, DEPT BIOL SCI, 14 SCI DR 4, SINGAPORE 117543, SINGAPORE.; SINGAPORE BOT GARDENS, 1 CLUNY RD, SINGAPORE 25956, SINGAPORE.;		10.1038/s41598-019-56049-y	ARTICLE	SEABIG [R-154-000-648-646, R-154-000-648-733]	WE ARE THANKFUL TO PETER ANG, MUHAMMAD NOH AL, AND MARYAM NADHEERA FOR THEIR VALUABLE ASSISTANCE. THE MOLECULAR WORK AND COMPUTATIONAL RESOURCES WERE SUPPORTED BY SEABIG (GRANTS R-154-000-648-646 AND R-154-000-648-733).	SEED-GERMINATION; IN-SITU; EPIPHYTIC ORCHIDS; PHYSIOLOGICAL ECOLOGY; MOLECULAR DIVERSITY; POPULATION-SIZE; FOREST; BIODIVERSITY; SPECIFICITY; COMMUNITIES	SCI REP	ENGLISH	31863015	NATURE PUBLISHING GROUP	2019	IZUDDIN, M; WEBB, EL (AUTOR CORRESPONDENTE), NATL UNIV SINGAPORE, DEPT BIOL SCI, 14 SCI DR 4, SINGAPORE 117543, SINGAPORE.	2045-2322	SCIENTIFIC REPORTS	8	AVAILABILITY OF ORCHID MYCORRHIZAL FUNGI ON ROADSIDE TREES IN A TROPICAL URBAN LANDSCAPE	9	Singapore	1.35208	103.82	-	-
JAIN A;KHOON K;GAN C;WEBB E	HABITAT LOSS AND URBANISATION IN THE TROPICS HAVE BEEN RECOGNISED AS MAJOR DRIVERS OF SPECIES EXTINCTIONS. CONCURRENTLY, NOVEL HABITATS SUCH AS URBAN PARKS HAVE BEEN SHOWN TO BE IMPORTANT AS HABITATS AND STEPPING STONES IN URBAN ECOSYSTEMS AROUND THE WORLD. HOWEVER, FEW STUDIES HAVE ASSESSED LONG-TENN PATTERNS OF SPECIES EXTINCTIONS AND DISCOVERIES IN RESPONSE TO THESE DRIVERS IN THE TROPICS. WE …		NATL UNIV SINGAPORE, DEPT BIOL SCI, SINGAPORE 117543, SINGAPORE.; NAT SOC SINGAPORE, 510 GEYLANG RD,02-05, SINGAPORE 389466, SINGAPORE.; BUTTERFLYCIRCLE SINGAPORE, WWW BUTTERFLYCIRCLE COM, SINGAPORE, SINGAPORE.; BIRDLIFE INT ASIA, 354 TANGLIN RD,01-16-17, SINGAPORE 247672, SINGAPORE.;	EXTINCTION; FRAGMENTATION; HABITAT DEGRADATION; LEPIDOPTERA; SOUTHEAST ASIA; URBAN ECOLOGY		ARTICLE	WILDLIFE RESERVES SINGAPORE CONSERVATION GRANT (2012) UNDER THE NATIONAL PARKS BOARD SINGAPORE [NP/RP13-003]	WE ARE GRATEFUL TO MEMBERS OF THE BUTTERFLY & INSECT GROUP, NATURE SOCIETY (SINGAPORE), IN PARTICULAR - STEVEN NEO, SIMON KEE MUN CHAN, YI KAI TEA, LOI ANG SOH HOON, AMY TSANG, KWOK CHOON TSANG, SOON CHYE CHAN, LENA CHOW AND YONG YIK SHIH; MEMBERS OF BUTTERFLYCIRCLE SINGAPORE, IN PARTICULAR - HORACE TAN, CHUEN KIONG CHNG, PENG FAI LOKE, BEN JIN TAN, FEDERICK HO, SIMON SNG AND SUNNY CHIR; AND TO R…	EXTINCTION DEBT; CONSERVATION; DEFORESTATION; VEGETATION; PLANTS; BIRD	RAFFLES BULL. ZOOL.	ENGLISH		NATL UNIV SINGAPORE, SCHOOL BIOLOGICAL SCIENCES	2018	JAIN, A; WEBB, EL (AUTOR CORRESPONDENTE), NATL UNIV SINGAPORE, DEPT BIOL SCI, SINGAPORE 117543, SINGAPORE.; JAIN, A (AUTOR CORRESPONDENTE), NAT SOC SINGAPORE, 510 GEYLANG RD,02-05, SINGAPORE 389466, SINGAPORE.; JAIN, A (AUTOR CORRESPONDENTE), BIRDLIFE INT ASIA, 354 TANGLIN RD,01-16-17, SINGAPORE 247672, SINGAPORE.	0217-2445	RAFFLES BULLETIN OF ZOOLOGY	6	BUTTERFLY EXTIRPATIONS DISCOVERIES AND REDISCOVERIES IN SINGAPORE OVER 28 YEARS	66	Singapore	1.35208	103.82	-	-
OH R;RICHARDS D;YEE A	COMMUNITY-DRIVEN VERTICAL GREENERY PROVIDES A PREVIOUSLY UNDER-APPRECIATED RESOURCE THAT COULD BE AN IMPORTANT COMPONENT OF TROPICAL URBAN ECOLOGY. WHILE THE CORRIDORS OF BUILDINGS HAVE BEEN DESIGNED TO FACILITATE THE CIRCULATION OF RESIDENTS BETWEEN SPACES, THIS STUDY SHOWS THAT SUCH CORRIDORS INCIDENTALLY SERVED AS AN INFORMAL SPACE FOR COMMUNITY-DRIVEN VERTICAL GREENERY. ACROSS 1.86 HA OF SURV…		NATL PK BOARD, CTR URBAN GREENERY & ECOL, SINGAPORE, SINGAPORE.; SINGAPORE ETH CTR, FUTURE CITIES LAB, ETH ZURICH, SINGAPORE, SINGAPORE.;	ECOSYSTEM SERVICES; VERTICAL GREENERY; URBAN ECOLOGY; INFORMAL GREEN SPACE; GARDEN	10.1016/j.landurbplan.2017.08.014	ARTICLE	FUTURE CITIES LABORATORY AT THE SINGAPORE-ETH CENTRE UNDER ITS CAMPUS FOR RESEARCH EXCELLENCE AND TECHNOLOGICAL ENTERPRISE PROGRAMME [FI 370074016]; ETH ZURICH UNDER ITS CAMPUS FOR RESEARCH EXCELLENCE AND TECHNOLOGICAL ENTERPRISE PROGRAMME [FI 370074016]; SINGAPORE'S NATIONAL RESEARCH FOUNDATION UNDER ITS CAMPUS FOR RESEARCH EXCELLENCE AND TECHNOLOGICAL ENTERPRISE PROGRAMME [FI 370074016]	THE AUTHORS WISH TO THANK NG SILI AND LEE WAN HOON FOR THEIR RESEARCH ASSISTANCE IN THIS STUDY, AND COLLEAGUES FROM THE SINGAPORE HERBARIUM (SING) FOR THEIR KIND ASSISTANCE IN PLANT IDENTIFICATIONS. WE ARE GRATEFUL ALSO TO OUR THREE REVIEWERS FOR THEIR INSIGHTFUL COMMENTS. D.R.R. WAS SUPPORTED BY THE FUTURE CITIES LABORATORY AT THE SINGAPORE-ETH CENTRE, WHICH WAS ESTABLISHED COLLABORATIVELY BETWE…	DAYLIGHT ILLUMINANCE; URBAN GREENERY; SHADE; CONSERVATION; ROOFS; ENVIRONMENT; ADAPTATION; LANDSCAPE; ECOLOGY; PEOPLE	LANDSC. URBAN PLAN.	ENGLISH		ELSEVIER SCIENCE BV	2018	OH, RRY (AUTOR CORRESPONDENTE), NATL PK BOARD, CTR URBAN GREENERY & ECOL, SINGAPORE, SINGAPORE.	0169-2046	LANDSCAPE AND URBAN PLANNING	8	COMMUNITYDRIVEN SKYRISE GREENERY IN A DENSE TROPICAL CITY PROVIDES BIODIVERSITY AND ECOSYSTEM SERVICE BENEFITS	169	Singapore	1.35208	103.82	-	-
TANG G;SADANANDAN K;RHEINDT F	WITH INCREASING URBANIZATION, URBAN-FRAGMENTED LANDSCAPES ARE BECOMING MORE AND MORE PREVALENT WORLDWIDE. SUCH FRAGMENTATION MAY LEAD TO SMALL, ISOLATED POPULATIONS THAT FACE GREAT THREATS FROM GENETIC FACTORS THAT AFFECT EVEN AVIAN SPECIES WITH HIGH DISPERSAL PROPENSITIES. YET FEW STUDIES HAVE INVESTIGATED THE POPULATION GENETICS OF SPECIES LIVING WITHIN URBAN-FRAGMENTED LANDSCAPES IN THE OLD WO…		NATL UNIV SINGAPORE, DEPT BIOL SCI, 14 SCI DR 4, SINGAPORE 117543, SINGAPORE.;	BIRDS; GENE FLOW; GENETIC DIVERSITY; OLD WORLD TROPICS; POPULATION STRUCTURE; SOUTH-EAST ASIA	10.1002/ece3.1832	ARTICLE	NATIONAL UNIVERSITY OF SINGAPORE DEPARTMENT OF BIOLOGICAL SCIENCES [WBS R-154-000-583-651]; FACULTY OF SCIENCES [WBS R-154-000-570-133]	THIS RESEARCH WAS FUNDED BY A NATIONAL UNIVERSITY OF SINGAPORE DEPARTMENT OF BIOLOGICAL SCIENCES GRANT TO FER (WBS R-154-000-583-651) AND A FACULTY OF SCIENCES GRANT TO FER (WBS R-154-000-570-133).	PHYLOGENETIC-RELATIONSHIPS; NEOTROPICAL BIRDS; MITOCHONDRIAL; EXTINCTION; DIVERSITY; RISK; CONSERVATION; BIODIVERSITY; SOFTWARE; FORESTS	ECOL. EVOL.	ENGLISH	26811776	WILEY	2016	RHEINDT, FE (AUTOR CORRESPONDENTE), NATL UNIV SINGAPORE, DEPT BIOL SCI, 14 SCI DR 4, SINGAPORE 117543, SINGAPORE.	2045-7758	ECOLOGY AND EVOLUTION	7	POPULATION GENETICS OF THE OLIVEWINGED BULBUL PYCNONOTUS PLUMOSUS IN A TROPICAL URBANFRAGMENTED LANDSCAPE	6	Singapore	1.35208	103.82	-	-

## Sheet: urban_resource_management_data
AU	AB	AR	C1	DE	DI	DT	FU	FX	ID	JI	LA	PM	PN	PU	PY	RP	SN	SO	TC	TI	VL	SA	LAT1	LON1	LAT2	LON2
BARIMA Y;ANGAMAN D;N'GOURAN K;KOFFI N;KARDEL F;DE C C;SAMSON R	PARTICULATE MATTER (PM) EMISSIONS, AND THE ASSOCIATED HUMAN HEALTH RISKS, ARE LIKELY TO CONTINUE INCREASING IN URBAN ENVIRONMENTS OF DEVELOPING COUNTRIES LIKE ABIDJAN (IVORY COST). THIS STUDY EVALUATED THE POTENTIAL OF LEAVES OF SEVERAL HERBACEOUS AND TREE SPECIES AS BIOINDICATORS OF URBAN PARTICULATE MATTER POLLUTION, AND ITS VARIATION OVER DIFFERENT LAND USE CLASSES, IN A TROPICAL AREA. FOUR SP…		UNIVERSITÉ JEAN LOROUGNON GUÉDÉ, UNITÉ DE FORMATION ET DE RECHERCHE EN ENVIRONNEMENT, BP 150 DALOA, COTE D'IVOIRE; UNIVERSITÉ NANGUI ABROGOUA, 02 BP 801 ABIDJAN 02, COTE D'IVOIRE; UNIVERSITY OF ANTWERP, DEPARTMENT OF BIOSCIENCE ENGINEERING, GROENENBORGERLAAN 171, 2020 ANTWERPEN, BELGIUM; UNIVERSITY OF MAZANDARAN, FACULTY OF SCIENCES, P.O. BOX: 416, BABOLSAR, MAZANDARAN, IRAN; UNIVERSITÉ LIBRE DE …	BIOINDICATOR; LEAF SIRM; LOCAL AIR QUALITY; PARTICULATE MATTER; TROPICAL URBAN	10.1016/j.scitotenv.2013.10.082	ARTICLE	AGENCE NATIONALE POUR LE DÉVELOPPEMENT DE LA RECHERCHE UNIVERSITAIREAGENCE NATIONALE POUR LE DÉVELOPPEMENT DE LA RECHERCHE UNIVERSITAIRE, ANDRU	THIS STUDY WAS SUPPORTED BY BELGIUM INSTITUTIONS: “VLAAMSE INTERUNIVERSITAIRE RAAD” (VLIR/UOS) , “COMMISSION UNIVERSITAIRE POUR LE DÉVELOPPEMENT” (CIUF/CUD) AND “FONDATION DAVID ET ALICE VAN BUUREN (UNIVERSITÉ LIBRE DE BRUXELLES)” . WE THANK THE CITY COUNCIL OF “DISTRICT AUTONOME D'ABIDJAN” FOR THEIR ASSISTANCE IN ACHIEVING FIELD DATA. WE ALSO WOULD LIKE TO THANK SIMBO D J, HOFFMAN J AND STOKKAER…	AIR QUALITY; BIOMARKERS; DEVELOPING COUNTRIES; FORESTRY; ISOTHERMS; LAND USE; POLLUTION; ROADS AND STREETS; TROPICS; URBAN PLANNING; ATMOSPHERIC PARTICULATE MATTER; BIOINDICATOR; LEAF SIRM; PARTICULATE MATTER; PARTICULATE MATTER EMISSIONS; SATURATION ISOTHERMAL REMANENT MAGNETIZATIONS; TROPICAL URBAN; URBAN PARTICULATE MATTERS; PLANTS (BOTANY); AIR QUALITY; ATMOSPHERIC POLLUTION; BIOINDICATOR; HE…	SCI. TOTAL ENVIRON.	ENGLISH	24239818		ELSEVIER	2014	BARIMA, Y.S.S.; DEPARTMENT OF BIOSCIENCE ENGINEERING, FACULTY OF SCIENCES, UNIVERSITY OF ANTWERP, GROENENBORGERLAAN 171, B-2020 ANTWERPEN, BELGIUM; EMAIL: BYSSABAS@GMAIL.COM	00489697	SCIENCE OF THE TOTAL ENVIRONMENT	29	ASSESSING ATMOSPHERIC PARTICULATE MATTER DISTRIBUTION BASED ON SATURATION ISOTHERMAL REMANENT MAGNETIZATION OF HERBACEOUS AND TREE LEAVES IN A TROPICAL URBAN ENVIRONMENT	470-471	Abidjan, Ivory Coast	-22.4975	17.0154	-	-
DE O J;AHMED A	URBAN AGRICULTURE PROVIDES ONE OF THE MOST PROMISING AREAS FOR INNOVATION IN GREEN AND BLUE INFRASTRUCTURE IN CITIES, PARTICULARLY IN DEVELOPING COUNTRIES. IT CAN ADDRESS MULTIPLE ECONOMIC, SOCIAL AND LOCAL ENVIRONMENTAL BENEFITS. DESPITE THIS CRITICAL ROLE, URBAN AGRICULTURE OFTEN FACES MANY CHALLENGES, INCLUDING LAND COMPETITION, LACK OF URBAN POLICY DIRECTIVES, UNFAIR LAND USE PLANNING AND LAN…	127730	FUNDACAO GETULIO VARGAS, FGV EAESP, SAO PAULO, BRAZIL.; FGV EBAPE, SAO PAULO, BRAZIL.; FUDAN UNIV, INST GLOBAL PUBL POLICY, SHANGHAI, PEOPLES R CHINA.; SD DOMBO UNIV BUSINESS & INTEGRATED DEV STUDIES, FAC PLANNING & LAND MANAGEMENT, DEPT PLANNING, WA CAMPUS, WA, GHANA.;	URBAN AGRICULTURE; URBAN GOVERNANCE; GREEN INFRASTRUCTURE; ACCRA; GHANA	10.1016/j.jclepro.2021.127730	ARTICLE	FAPESP [2017/504259]; CAPES [88881.310380/2018-01]; CNPQ [442472/2020]	WE ACKNOWLEDGE THE SUPPORT OF OUR ORGANIZATIONS FOR THE INSTITUTIONAL RESEARCH EFFORTS FOR THIS RESEARCH TO BE COMPLETED. JOSE A PUPPIM DE OLIVEIRA ACKNOWLEDGES THE SUPPORT OF FAPESP (GRANT #2017/504259) , CAPES (GRANT #88881.310380/2018-01) AND CNPQ (GRANT #442472/2020) . THE RESEARCH WAS INITIALLY CONDUCTED DURING A STUDENT TRIP IN 2009 WHEN THE AUTHOR WAS WORKING AT THE UNIVERSITY COLLEGE LOND…	CITY PROFILE; LAND; POTENTIALS; POLITICS; HEALTH; KUMASI; CHIEFS; SCALE	J. CLEAN PROD.	ENGLISH			ELSEVIER SCI LTD	2021	AHMED, A (AUTOR CORRESPONDENTE), SD DOMBO UNIV BUSINESS & INTEGRATED DEV STUDIES, FAC PLANNING & LAND MANAGEMENT, DEPT PLANNING, WA CAMPUS, WA, GHANA.	0959-6526	JOURNAL OF CLEANER PRODUCTION	8	GOVERNANCE OF URBAN AGRICULTURE IN AFRICAN CITIES GAPS AND OPPORTUNITIES FOR INNOVATION IN ACCRA GHANA	312	Accra, Ghana	5.60372	-0.186964	-	-
SONI M;GIRACH I;SAHU L;OJHA N	THE PHOTOCHEMICAL PROCESSES OVER TROPICAL INDIAN REGION IMPACT THE ATMOSPHERIC COMPOSITION AND AIR QUALITY OVER LOCAL TO GLOBAL SCALES; NEVERTHELESS, STUDIES ON DETAILED ATMOSPHERIC CHEMISTRY REMAIN SPARSE IN THIS REGION. IN THIS STUDY, WE INVESTIGATE THE PHOTOCHEMICAL EVOLUTION OF AIR IN THE DOWNWIND OF A TROPICAL SEMI-ARID URBAN ENVIRONMENT (AHMEDABAD) IN INDIA USING THE MASTER MECHANISM MODEL.…	134070	PHYSICAL RESEARCH LABORATORY, AHMEDABAD, INDIA; INDIAN INSTITUTE OF TECHNOLOGY, GUJARAT, GANDHINAGAR, INDIA; SPACE PHYSICS LABORATORY, VIKRAM SARABHAI SPACE CENTRE, THIRUVANANTHAPURAM, INDIA; PRESENTLY AT SPACE APPLICATION CENTRE, INDIAN SPACE RESEARCH ORGANISATION, AHMEDABAD, INDIA	AIR QUALITY; BOX MODELING; RADICALS; SOUTH ASIA; SURFACE OZONE; TRACE GASES; URBAN POLLUTION; VOCS	10.1016/j.chemosphere.2022.134070	ARTICLE	NATIONAL AERONAUTICS AND SPACE ADMINISTRATIONNATIONAL AERONAUTICS AND SPACE ADMINISTRATION, NASA CHINESE ACADEMY OF MEDICAL SCIENCESCHINESE ACADEMY OF MEDICAL SCIENCES, CAMS	WE THANK SASHA MADRONICH AND COWORKERS AT THE NATIONAL CENTER FOR ATMOSPHERIC RESEARCH (NCAR) FOR THE MASTER MECHANISM BOX MODEL AVAILABLE THROUGH THE NCAR ACOM WEBSITE (HTTPS://WWW2.ACOM.UCAR.EDU/MODELING/MASTER-MECHANISM-DOWNLOAD). WE ACKNOWLEDGE THE SCIENTISTS AND ASSOCIATED NASA PERSONNEL INVOLVED IN THE PRODUCTION OF GIOVANNI ONLINE DATA SYSTEM FOR PROVIDING MERRA-2 AND OMI DATA USED IN THE …	AIR QUALITY; ATMOSPHERIC CHEMISTRY; ATMOSPHERIC COMPOSITION; CARBON MONOXIDE; KETONES; NITROGEN OXIDES; OZONE; PHOTOLYSIS; TROPICS; URBAN PLANNING; BOX MODELS; MODEL-BASED OPC; PHOTOCHEMICAL PROCESS; PHOTOCHEMICALS; RADICAL; SOUTH ASIA; SURFACE OZONE; TRACE GAS; URBAN ENVIRONMENTS; URBAN POLLUTIONS; VOLATILE ORGANIC COMPOUNDS; ACID; ALCOHOL DERIVATIVE; ALDEHYDE; CARBON MONOXIDE; HYDROGEN PEROXIDE…	CHEMOSPHERE	ENGLISH	35231476		ELSEVIER LTD	2022	OJHA, N.; PHYSICAL RESEARCH LABORATORYINDIA; EMAIL: OJHA@PRL.RES.IN	00456535	CHEMOSPHERE	1	PHOTOCHEMICAL EVOLUTION OF AIR IN A TROPICAL URBAN ENVIRONMENT OF INDIA A MODELBASED STUDY	297	Ahmedabad, India	23.0145	72.5918	-	-
ABENDROTH S;KOWARIK I;MULLER N;VON D L M	COLONIAL GARDEN ARCHITECTURE WITH ASSOCIATED USE OF NON-NATIVE PLANT SPECIES INFLUENCES THE IDENTITY OF MANY TROPICAL CITIES. IN INDONESIA, COLONIAL PLANNERS ARGUED FOR PLANTING BOTH NATIVE AND NON-NATIVE SPECIES. IT REMAINS UNCLEAR HOW FAR THIS SUGGESTION WAS IMPLEMENTED IN URBAN PARKS AND IF SPECIES PROPOSED IN COLONIAL PERIOD STILL OCCUR IN THE PARKS OR GOT REPLACED BY COMMON NON-NATIVE SPECIE…		UNIV APPL SCI ERFURT, DEPT LANDSCAPE MANAGEMENT & RESTORAT ECOL, D-99085 ERFURT, GERMANY.; HEAD OFF URBIO, D-99085 ERFURT, GERMANY.; TECH UNIV BERLIN, DEPT ECOL, D-12165 BERLIN, GERMANY.;	EXOTIC SPECIES; HORTICULTURE; ORNAMENTALS; PLANT DESIGN; JAVA	10.1016/j.landurbplan.2011.12.006	ARTICLE	GERMAN ACADEMIC EXCHANGE SERVICE; UNIVERSITY OF APPLIED SCIENCES ERFURT; INSTITUT TEKNOLOGI BANDUNG	WE GRATEFULLY ACKNOWLEDGE ARIEF HAMIDI, REZA ABDUL KODIR, ODILIA DEVINNA EVANNY AND HUDA NURJANTI FOR IDENTIFYING PLANTS AND TIRELESS ASSISTING AT FIELD SURVEYS AS WELL AS GIEZ LANTU FOR DUTCH TRANSLATIONS. WE ALSO WANT TO EXPRESS OUR APPRECIATION TO THE BANDUNG GARDEN DEPARTMENT AND THE BANDUNG HERITAGE SOCIETY FOR PROVIDING ADDITIONAL DATA ABOUT PARK AND TOWN HISTORY. THE STUDY WAS FUNDED BY GE…	URBAN; INVASION; LANDSCAPE; CITY	LANDSC. URBAN PLAN.	ENGLISH			ELSEVIER	2012	ABENDROTH, S (AUTOR CORRESPONDENTE), WEITLINGSTR 103, D-10317 BERLIN, GERMANY.	0169-2046	LANDSCAPE AND URBAN PLANNING	24	THE GREEN COLONIAL HERITAGE WOODY PLANTS IN PARKS OF BANDUNG INDONESIA	106	Bandung, Indonesia	-6.90216	107.619	-	-
UDOMSRI S;MARTIN A;MARTIN V	ENERGY RECOVERY FROM FLUE GASES IN THERMAL TREATMENT PLANTS IS AN INTEGRAL PART OF MUNICIPAL SOLID WASTE (MSW) MANAGEMENT FOR MANY INDUSTRIALIZED NATIONS. OFTEN COGENERATION CAN BE EMPLOYED FOR BOTH ENHANCING THE PLANT PROFITABILITY AND INCREASING THE OVERALL ENERGY YIELD. HOWEVER, IT IS NORMALLY DIFFICULT TO JUSTIFY TRADITIONAL COGENERATION IN TROPICAL LOCATIONS SINCE THERE IS LITTLE NEED FOR TH…		ROYAL INST TECHNOL KTH, DEPT ENERGY TECHNOL, S-10044 STOCKHOLM, SWEDEN.;	MSW INCINERATION; ABSORPTION CHILLERS; THERMALLY DRIVEN COOLING; ECONOMIC EVALUATION; GREENHOUSE GAS REDUCTION; TROPICAL URBAN AREAS	10.1016/j.apenergy.2010.12.020	ARTICLE	SWEDISH INTERNATIONAL DEVELOPMENT COOPERATION AGENCY (SIDA), DEPARTMENT FOR RESEARCH COOPERATION, SAREC [SWE-2007-047]	THE AUTHORS WISH TO CONVEY THEIR SINCERE APPRECIATION TO SWEDISH INTERNATIONAL DEVELOPMENT COOPERATION AGENCY (SIDA), DEPARTMENT FOR RESEARCH COOPERATION, SAREC FOR FINANCIAL SUPPORT OF THIS PROJECT (CONTRACT NO. SWE-2007-047).	ABSORPTION; SYSTEM; ENERGY; FEASIBILITY; EMISSIONS	APPL. ENERGY	ENGLISH			ELSEVIER SCI LTD	2011	UDOMSRI, S (AUTOR CORRESPONDENTE), ROYAL INST TECHNOL KTH, DEPT ENERGY TECHNOL, BRINELLVAGEN 68, S-10044 STOCKHOLM, SWEDEN.	0306-2619	APPLIED ENERGY	24	THERMALLY DRIVEN COOLING COUPLED WITH MUNICIPAL SOLID WASTEFIRED POWER PLANT APPLICATION OF COMBINED HEAT COOLING AND POWER IN TROPICAL URBAN AREAS	88	Bangkok, Thailand	13.7563	100.502	-	-
CHITWATKULSIRI D;MIYAMOTO H;IRVINE K;PILAILAR S;LOC H	IN URBAN AREAS OF THAILAND, AND ESPECIALLY IN BANGKOK, RECENT FLASH FLOODS HAVE CAUSED SEVERE DAMAGE AND PROMPTED A RENEWED FOCUS TO MANAGE THEIR IMPACTS. THE DEVELOPMENT OF A REAL-TIME WARNING SYSTEM COULD PROVIDE TIMELY INFORMATION TO INITIATE FLOOD MANAGEMENT PROTOCOLS, THEREBY REDUCING IMPACTS. THEREFORE, WE DEVELOPED AN INNOVATIVE REAL-TIME FLOOD FORECASTING SYSTEM (RTFLOOD SYSTEM) AND APPLI…	1641	SHIBAURA INST TECHNOL, DEPT CIVIL ENGN, 3-7-5 TOYOSU,KOTO KU, TOKYO 1358548, JAPAN.; THAMMASAT UNIV RANGSIT CAMPUS, FAC ARCHITECTURE & PLANNING, KHLONG LUANG 12121, PATHUMTHANI, THAILAND.; KASETSART UNIV, FAC ENGN, BANGKOK 10900, THAILAND.; ASIAN INST TECHNOL, SCH ENGN & TECHNOL, KHLONG LUANG 12120, PATHUMTHANI, THAILAND.;	REAL-TIME WARNING; URBAN FLOOD FORECASTING; HIGH-RESOLUTION DEM; 2D (TWO-DIMENSIONAL) OVERLAND FLOW MODELING; RADAR RAINFALL FORECASTING	10.3390/w14101641	ARTICLE	PCSWMM PROFESSIONAL 2D EDUCATIONAL SOFTWARE FROM COMPUTATIONAL HYDRAULICS INTERNATIONAL (CHI)	THE AUTHORS SINCERELY THANK THE DRAINAGE AND SEWERAGE DEPARTMENT OF THE BANGKOK METROPOLITAN ADMINISTRATION FOR PROVIDING DATA AND NECESSARY INFORMATION FOR THE RESEARCH. THE AUTHORS WOULD ALSO LIKE TO THANK ALL LABORATORY MEMBERS FOR THEIR ADVICE AND HELP IN COMPUTER TECHNOLOGY. D.C. IS GRATEFUL TO THE CHI UNIVERSITY GRANT PROGRAM FOR THE PCSWMM PROFESSIONAL 2D EDUCATIONAL SOFTWARE FROM COMPUTAT…	OF-THE-ART; CLIMATE-CHANGE; AUTOMATIC CALIBRATION; FLASH FLOODS; PRECIPITATION; RUNOFF; RADAR; IDENTIFICATION; RESILIENCE; FRAMEWORK	WATER	ENGLISH			MDPI	2022	CHITWATKULSIRI, D (AUTOR CORRESPONDENTE), SHIBAURA INST TECHNOL, DEPT CIVIL ENGN, 3-7-5 TOYOSU,KOTO KU, TOKYO 1358548, JAPAN.		WATER	0	DEVELOPMENT AND APPLICATION OF A REALTIME FLOOD FORECASTING SYSTEM RTFLOOD SYSTEM IN A TROPICAL URBAN AREA A CASE STUDY OF RAMKHAMHAENG POLDER BANGKOK THAILAND	14	Bangkok, Thailand	13.7563	100.502	-	-
DE O S J;COHEN J	CITIES EXPERIENCE THE EXTENSIVE URBAN HEAT ISLAND EFFECT (UHI), WHICH CONTINUE TO POSE CHALLENGES FOR HUMANITY'S INCREASINGLY URBAN POPULATION, WHERE TROPICAL CITIES HAVE EXPERIENCED A CONTINUED AND RAPID URBANIZATION PROCESS IN THE PAST FEW DECADES. WE PRESENT THE EVOLUTION OF SURFACE UHI AND ITS CONTROLLING FACTORS IN THE METROPOLITAN REGION OF BELÉM, OVER THE LAST 16 YEARS (2003-2018), WHICH H…	E20200260	UNIVERSIDADE FEDERAL DO PARÁ, INSTITUTO DE GEOCIÊNCIAS, BELÉM, PA, BRAZIL	AMAZONIA; LAND SURFACE TEMPERATURE; REMOTE SENSING; URBAN GROWTH; URBAN HEAT ISLAND	10.1590/2175-3369.013.E20200260	ARTICLE	NATIONAL AERONAUTICS AND SPACE ADMINISTRATIONNATIONAL AERONAUTICS AND SPACE ADMINISTRATION, NASA U.S. GEOLOGICAL SURVEYU.S. GEOLOGICAL SURVEY, USGS UNIVERSIDADE FEDERAL DO PARÁUNIVERSIDADE FEDERAL DO PARÁ, UFPA	THE AUTHORS ARE GRATEFUL FOR FINANCIAL SUPPORT FROM THE GRADUATE PROGRAM IN ENVIRONMENTAL SCIENCES (PPGCA) AT FEDERAL UNIVERSITY OF PARÁ (UFPA). WE ALSO THANK THE NASA AND USGS FOR THE PROVISION OF SATELLITE DATA, THE BRAZILIAN NATIONAL INSTITUTE OF METEOROLOGY (INMET) FOR THE METEOROLOGICAL DATA AND GOOGLE EARTH ENGINE DEVELOPERS FOR THEIR SUPPORT. NA NA		URBE	ENGLISH			PONTIFICIA UNIVERSIDADE CATOLICA DO PARANA	2021		21753369	URBE	3	SPATIOTEMPORAL VARIABILITY OF URBAN HEAT ISLAND INFLUENCE OF URBANIZATION ON SEASONAL PATTERN OF LAND SURFACE TEMPERATURE IN THE METROPOLITAN REGION OF BELÉM BRAZIL VARIABILIDADE ESPAÇOTEMPORAL DAS ILHAS DE CALOR URBANO INFLUÊNCIA DA URBANIZAÇÃO NO PADRÃO SAZONAL DA TEMPERATURA DA SUPERFÍCIE TERRESTRE NA REGIÃO METROPOLITANA DE BELÉM BRASIL	13	Bélem, Brazil	-1.45498	-48.5023	-	-
SILVA T;VINCON-LEITE B;LEMAIRE B;PETRUCCI G;GIANI A;FIGUEREDO C;NASCIMENTO N	WORLDWIDE, EUTROPHICATION AND CYANOBACTERIA BLOOMS IN LAKES AND RESERVOIRS ARE A GREAT CONCERN FOR WATER RESOURCES MANAGEMENT. COUPLING A CATCHMENT HYDROLOGICAL MODEL AND A LAKE MODEL HAS BEEN A STRATEGY TO ASSESS THE IMPACT OF LAND USE, AGRICULTURAL PRACTICES AND CLIMATE CHANGE ON WATER QUALITY. HOWEVER, RESEARCH HAS MAINLY FOCUSED ON LARGE LAKES, WHILE URBAN RESERVOIRS AND THEIR CATCHMENTS, ESP…	946	UNIV FED MINAS GERAIS, DEPT HYDRAUL ENGN & WATER RESOURCES, 6627 AV ANTONIO CARLOS, BR-31270901 BELO HORIZONTE, MG, BRAZIL.; UPEC, ECOLE PONTS PARIS TECH, AGROPARISTECH, LEESU, F-77455 MARNE LA VALLEE, FRANCE.; PROLOG INGN, 5-7 RUE METZ, F-75010 PARIS, FRANCE.; UNIV FED MINAS GERAIS, INST BIOL SCI, DEPT BOT, 6627 AV ANTONIO CARLOS, BR-31270901 BELO HORIZONTE, MG, BRAZIL.;	LAKE ECOLOGICAL MODELLING; SWMM; DYRESM-CAEDYM; RUNOFF WATER QUALITY; LAKE PAMPULHA; TROPICAL RESERVOIRS	10.3390/w11050946	ARTICLE	BRAZILIAN AGENCY FINEP (FINANCIADORA DE INOVACAO E PESQUISA); BRAZILIAN AGENCY CNPQ; CAPES; ECOLE DES PONTS PARIS TECH; UFMG	THIS RESEARCH WAS CONDUCTED WITHIN THE STORMWATER MANAGEMENT PROJECT (MAPLU 2 PROJECT) FUNDED BY THE BRAZILIAN AGENCIES FINEP (FINANCIADORA DE INOVACAO E PESQUISA) AND CNPQ. A. GIANI AND N. NASCIMENTO ARE CNPQ FELLOWS (BRAZILIAN RESEARCHER FELLOWSHIP PROGRAM). CAPES AND ECOLE DES PONTS PARIS TECH FUNDED TALITA SILVA'S SCHOLARSHIP. UFMG FUNDED PUBLISHING COSTS.	WATER-QUALITY; CLIMATE-CHANGE; LAND-USE; NUTRIENT LOAD; ALGAL BLOOMS; PHYTOPLANKTON; MODEL; MANAGEMENT; CATCHMENT; CALIBRATION	WATER	ENGLISH			MDPI	2019	SILVA, TFG (AUTOR CORRESPONDENTE), UNIV FED MINAS GERAIS, DEPT HYDRAUL ENGN & WATER RESOURCES, 6627 AV ANTONIO CARLOS, BR-31270901 BELO HORIZONTE, MG, BRAZIL.		WATER	15	IMPACT OF URBAN STORMWATER RUNOFF ON CYANOBACTERIA DYNAMICS IN A TROPICAL URBAN LAKE	11	Belo Horizonte, Brazil	-19.9173	-43.9346	-	-
DE M N;BRIGHENTI L;BARBOSA F;STAEHR P;NETO J	DE MELLO NAST, BRIGHENTI LS, BARBOSA FAR, STAEHR PA, BEZARRA NETO JF. 2017. SPATIAL VARIABILITY OF METHANE (CH4) EBULLITION IN A TROPICAL HYPEREUTROPHIC RESERVOIR: SILTED AREAS AS A BUBBLE HOT SPOT. LAKE RESERV MANAGE. 35:105114.THE CONCENTRATION OF METHANE (CH4) HAS DOUBLED IN THE ATMOSPHERE OVER THE LAST 200 YR, RAISING THE NEED TO UNDERSTAND EMISSIONS OF THIS POTENT GREENHOUSE GAS FROM INLAND …		UNIV FED MINAS GERAIS, LAB LIMNOL ECOTOXICOL & AQUAT ECOL LIMNEA, BELO HORIZONTE, MG, BRAZIL.; AARHUS UNIV, DEPT BIOSCI, FREDERIKSBORGVEJ 399, ROSKILDE, DENMARK.;	HOT SPOT; METHANE EBULLITION; SPATIAL VARIABILITY; SILTATION; TROPICAL URBAN RESERVOIR	10.1080/10402381.2017.1390018	ARTICLE	SUPPORT FOUNDATION OF THE STATE OF MINAS GERAIS RESEARCH (FAPEMIG); HIGHER EDUCATION PERSONNEL IMPROVEMENT COORDINATION FOUNDATION (CAPES); CAPES [88887.059683/2014-00]	THIS WORK WAS FINANCIALLY SUPPORTED BY THE SUPPORT FOUNDATION OF THE STATE OF MINAS GERAIS RESEARCH (FAPEMIG) AND THE HIGHER EDUCATION PERSONNEL IMPROVEMENT COORDINATION FOUNDATION (CAPES), WHICH GRANTED A SCHOLARSHIP TO THE FIRST AUTHOR. THE AUTHORS LS BRIGHENTI AND PA STAEHR WERE FUNDED BY CAPES (PROC. NO. 88887.059683/2014-00).	WATER; LAKES; EMISSIONS; RELEASE; FLUX; SEDIMENT; SURFACES	LAKE RESERV. MANAG.	ENGLISH			TAYLOR & FRANCIS INC	2018	DE MELLO, NAST (AUTOR CORRESPONDENTE), UNIV FED MINAS GERAIS, LAB LIMNOL ECOTOXICOL & AQUAT ECOL LIMNEA, BELO HORIZONTE, MG, BRAZIL.	1040-2381	LAKE AND RESERVOIR MANAGEMENT	13	SPATIAL VARIABILITY OF METHANE CH4 EBULLITION IN A TROPICAL HYPEREUTROPHIC RESERVOIR SILTED AREAS AS A BUBBLE HOT SPOT	34	Belo Horizonte, Brazil	-19.9173	-43.9346	-	-
ALI S;PATNAIK S	THE FOLLOWING STUDY WAS TAKEN TO QUANTIFY THE POTENTIAL OF TREE CANOPY IN REDUCING TEMPERATURES. THE STUDY LOCATIONS (PARKS, FORESTS, PLANTATIONS) WITH MICRO-METEOROLOGICAL OBSERVATION PLOTS WERE STRATIFIED IN THE WATER PROXIMITY ZONES. THE MOBILE TRAVERSE WAS ADOPTED IN THE LOCATIONS TO COLLECT THE DATA ON SUMMER DAYS OF MAY AND JUNE 2016. TO OVERCOME TIME-LAG INDUCED TEMPERATURE CHANGES AMONG T…		INDIAN INST FOREST MANAGEMENT, DEPT ECOSYST & ENVIRONM MANAGEMENT, BHOPAL 462003, MADHYA PRADESH, INDIA.;		10.1016/j.uclim.2019.01.004	ARTICLE	UNIVERSITY GRANTS COMMISSION, NEW DELHI	THE AUTHORS WOULD LIKE TO THANK UNIVERSITY GRANTS COMMISSION, NEW DELHI FOR FUNDING THE RESEARCH UNDER THE NET JRF SCHEME. THIS STUDY IS PART OF THE SAME RESEARCH WORK.	COOL-ISLAND INTENSITY; HEAT-ISLAND; THERMAL ENVIRONMENT; GREEN AREAS; VEGETATION STRUCTURE; STREET TREES; SHADE TREES; OPEN SPACES; CLEAR-CUT; TEL-AVIV	URBAN CLIM.	ENGLISH			ELSEVIER	2019	ALI, SB (AUTOR CORRESPONDENTE), INDIAN INST FOREST MANAGEMENT, DEPT ECOSYST & ENVIRONM MANAGEMENT, BHOPAL 462003, MADHYA PRADESH, INDIA.	2212-0955	URBAN CLIMATE	16	ASSESSMENT OF THE IMPACT OF URBAN TREE CANOPY ON MICROCLIMATE IN BHOPAL A DEVISED LOWCOST TRAVERSE METHODOLOGY	27	Bhopal, India	23.2599	77.4126	-	-
SKOVMAND O;OUEDRAOGO T;SANOGO E;SAMUELSEN H;TOÉ L;BOSSELMANN R;CZAJKOWSKI T;BALDET T	A FIELD TEST OF INTEGRATED VECTOR CONTROL WAS CONDUCTED IN A TROPICAL URBAN SETTING WITH A COMBINATION OF A FLOATING, SLOW-RELEASE, GRANULAR FORMULATION OF BACILLUS SPHAERICUS AND ENVIRONMENTAL ENGINEERING MEASURES (RENOVATION OF ROADS, COLLECTIVE WATER PUMPS, AND CESSPOOL LIDS). THE TARGETS WERE CULEX QUINQUEFASCIATUS AND ANOPHELES GAMBIAE IN THE TWO BIGGEST TOWNS OF BURKINA FASO (WEST AFRICA). …		INTELLIGENT INSECT CONTROL, 118 CHEMIN DES ALOUETTES, 34170 CASTELNAU LE LEZ, FRANCE; CENTRE NATIONAL DE RECHERCHE ET DE FORMATION SUR LE PALUDISME, OUAGADOUGOU, BURKINA FASO; DEPARTMENT OF ANTHROPOLOGY, UNIVERSITY OF COPENHAGEN, COPENHAGEN, DENMARK; LÕINSTITUT DE RECHERCHE EN SCIENCE DE LA SANTÉ, CENTRE MURAZ, BOBO-DIOULASSO, BURKINA FASO; RAMBOLL GROUP A/S, COPENHAGEN, DENMARK; INSTITUT DE RECH…	BACILLUS SPHAERICUS; COST EFFECTIVENESS; CULEX QUINQUEFASCIATUS; INTEGRATED VECTOR CONTROL; LARVICIDE	10.1603/ME10041	ARTICLE		NA NA NA	ANIMAL; ARTICLE; BACILLUS; BURKINA FASO; CITY; CULEX; DISEASE CARRIER; ECONOMICS; LARVA; METHODOLOGY; MOSQUITO; ORGANIZATION AND MANAGEMENT; SANITATION; TROPIC CLIMATE; ANIMALS; BACILLUS; BURKINA FASO; CITIES; CULEX; INSECT VECTORS; LARVA; MOSQUITO CONTROL; SANITARY ENGINEERING; TROPICAL CLIMATE; ANOPHELES GAMBIAE; BACILLUS SPHAERICUS; CULEX PIPIENS QUINQUEFASCIATUS	J. MED. ENTOMOL.	ENGLISH	21845940	4		2011	SKOVMAND, O.; INTELLIGENT INSECT CONTROL, 118 CHEMIN DES ALOUETTES, 34170 CASTELNAU LE LEZ, FRANCE; EMAIL: OLE.SKOVMAND@INSECTCONTROL.NE	00222585	JOURNAL OF MEDICAL ENTOMOLOGY	11	COST OF INTEGRATED VECTOR CONTROL WITH IMPROVED SANITATION AND ROAD INFRASTRUCTURE COUPLED WITH THE USE OF SLOWRELEASE BACILLUS SPHAERICUS GRANULES IN A TROPICAL URBAN SETTING	48	Bobo-Dioulasso, Burkina Faso	11.1771	-4.2979	-	-
NASCIMENTO V;AGOSTINI K;SOUZA C;MARUYAMA P	URBAN AREAS CONTRIBUTE TO CONSERVATION OF POLLINATORS, BUT WE LACK ASSESSMENTS FROM THE MOST BIODIVERSE TROPICAL REGIONS IN THE WORLD. WE SYNTHESIZED STUDIES ON URBAN PLANT-POLLINATOR INTERACTIONS ACROSS BRAZIL, COMPILING 86 STUDIES CONDUCTED IN URBAN GREEN SPACES THAT REPORTED 2678 INTERACTIONS FOR 519 PLANT AND 337 ANIMAL SPECIES. WE EVALUATED THE SPATIO-TEMPORAL DISTRIBUTION OF THE DATA, EFFEC…	103801	BAHIA STATE UNIV UNEB, DEPT HUMAN SCI DCH, CAMPUS 9, BR-47800000 BARREIRAS, BA, BRAZIL.; FED UNIV SAO CARLOS UFSCAR, CTR AGR SCI, DEPT NAT SCI MATH & EDUC, BR-13600970 ARARAS, SP, BRAZIL.; FED UNIV PARANA UFPR, DEPT BOT, GRAD PROGRAM BOT, BR-81531980 CURITIBA, PARANA, BRAZIL.; FED UNIV MINAS GERAIS UFMG, CTR ECOL SYNTH & CONSERVAT, DEPT GENET ECOL & EVOLUT ICB, BR-31270901 BELO HORIZONTE, MG, BRA…		10.1016/j.landurbplan.2020.103801	ARTICLE	COORDENACAO DE APERFEICOAMENTO DE PESSOAL DE NIVEL SUPERIOR -CAPES [001]; PRO-REITORIA DE PESQUISA DA UNIVERSIDADE FEDERAL DE MINAS GERAIS	WE THANK PAULO E. OLIVEIRA FOR COMMENTS ON AN EARLIER VERSION OF THE MANUSCRIPT, ERICH A. FISCHER FOR HELP WITH BAT IDENTIFICATION, CAROLINE L. GROSS FOR KINDLY REVISING OUR MANUSCRIPT AND THE FOUR ANONYMOUS REVIEWERS FOR THOUGHTFUL COMMENTS THAT GREATLY IMPROVED THE QUALITY OF THE MANUSCRIPT. CSS WAS SUPPORTED BY COORDENACAO DE APERFEICOAMENTO DE PESSOAL DE NIVEL SUPERIOR -CAPES (FINANCE CODE 00…	NATIVE PLANTS; BIODIVERSITY; MODULARITY; NETWORKS; CITY; BEES; RICHNESS; URBANIZATION; CONSERVATION; ECOSYSTEM	LANDSC. URBAN PLAN.	ENGLISH			ELSEVIER	2020	MARUYAMA, PK (AUTOR CORRESPONDENTE), FED UNIV MINAS GERAIS UFMG, CTR ECOL SYNTH & CONSERVAT, DEPT GENET ECOL & EVOLUT ICB, BR-31270901 BELO HORIZONTE, MG, BRAZIL.	0169-2046	LANDSCAPE AND URBAN PLANNING	9	TROPICAL URBAN AREAS SUPPORT HIGHLY DIVERSE PLANTPOLLINATOR INTERACTIONS AN ASSESSMENT FROM BRAZIL	198	Brazil	-	-	-	-
SALVADOR C;ALINDAJAO A;BURDEOS K;LAVAPIEZ M;YEE J;BAUTISTA A;PABROA P;CAPANGPANGAN R	LONG-TERM TRENDS OF ATMOSPHERIC POLLUTANTS, PARTICULARLY OZONE (O-3) AND PARTICULATE MATTER (PM) PROVIDE A DIRECT EVALUATION OF THE RESPONSE OF THE ATMOSPHERE TO THE ENVIRONMENTAL POLICIES AND THE VARIABILITY OF ANTHROPOGENIC AND BIOGENIC EMISSIONS. HERE, WE REPORT THE ASSESSMENT OF THE TEMPORAL EVOLUTION OF THE AIR QUALITY IN A TROPICAL URBAN CITY (BUTUAN) IN THE SOUTHERN PHILIPPINES BY EVALUATI…	210269	UNIV GOTHENBURG, DEPT CHEM & MOL BIOL, ATMOSPHER SCI, SE-41296 GOTHENBURG, SWEDEN.; PHILIPPINE COUNCIL IND ENERGY & EMERGING TECHNOL, BALIK SCIENTIST PROGRAM, DEPT SCI & TECHNOL, BICUTAN 1630, PHILIPPINES.; INTEGRATED LABS DIV, DEPT AGR REG FIELD OFF 13, BUTUAN 8600, PHILIPPINES.; CARAGA STATE UNIV, MATH & STAT COMP & RES CTR, BUTUAN 8600, PHILIPPINES.; CARAGA STATE UNIV, DEPT MATH, BUTUAN 8600, …	MERRAERO; OZONE FORMING POTENTIAL; TROPICAL CITY; LONG-TERM TRENDS	10.4209/aaqr.210269	ARTICLE			FREE TROPOSPHERE; PARTICLE NUMBER; BROWN CARBON; BLACK CARBON; PM2.5; AIR; URBAN; VARIABILITY; VISUALIZATION; EMISSIONS	AEROSOL AIR QUAL. RES.	ENGLISH			TAIWAN ASSOC AEROSOL RES-TAAR	2022	SALVADOR, CMG (AUTOR CORRESPONDENTE), UNIV GOTHENBURG, DEPT CHEM & MOL BIOL, ATMOSPHER SCI, SE-41296 GOTHENBURG, SWEDEN.; SALVADOR, CMG (AUTOR CORRESPONDENTE), PHILIPPINE COUNCIL IND ENERGY & EMERGING TECHNOL, BALIK SCIENTIST PROGRAM, DEPT SCI & TECHNOL, BICUTAN 1630, PHILIPPINES.	1680-8584	AEROSOL AND AIR QUALITY RESEARCH	2	ASSESSMENT OF IMPACT OF METEOROLOGY AND PRECURSOR IN LONGTERM TRENDS OF PM AND OZONE IN A TROPICAL CITY	22	Butuan, Philippines	8.95155	125.528	-	-
RODRÍGUEZ-ALGECIRAS J;TABLADA A;CHAOS-YERAS M;DE L P G;MATZARAKIS A	THE COMBINED EFFECT OF CLIMATE CHANGE AND URBAN HEAT ISLAND (UHI) EFFECT IS LEADING TO A RISE IN AIR TEMPERATURE IN URBAN AREAS, INCLUDING THOSE WITH HERITAGE VALUE. URBAN MORPHOLOGY AND ITS EFFECT ON SUN SHADING CONDITIONS IN TROPICAL CITIES IS CRUCIAL TO REDUCE UHI AND IMPROVE OUTDOOR THERMAL COMFORT. THIS PAPER PRESENTS A TEMPORAL-SPATIAL ANALYSIS OF THE EFFECT OF COURTYARDS GEOMETRY ON THEIR …		DEPARTMENT OF ARCHITECTURE, UNIVERSITY OF CAMAGÜEY, CUBA; ARCHITECTURE TECHNICAL SCHOOL OF BARCELONA, SPAIN; DEPARTMENT OF ARCHITECTURE, NATIONAL UNIVERSITY OF SINGAPORE, SINGAPORE; ALBERT-LUDWIGS-UNIVERSITY FREIBURG, GERMANY; RESEARCH CENTER HUMAN BIOMETEOROLOGY, DEUTSCHER WETTERDIENST, GERMANY	COURTYARD GEOMETRY; MEAN RADIANT TEMPERATURE; SOLAR RADIATION; THERMAL COMFORT; TROPICAL ARCHITECTURE; WARM-HUMID CLIMATE	10.1016/j.renene.2018.01.082	ARTICLE		NA NA NA	ATMOSPHERIC TEMPERATURE; CLIMATE CHANGE; GEOMETRY; SOLAR RADIATION; THERMAL COMFORT; URBAN PLANNING; HIGH ASPECT RATIO; MEAN RADIANT TEMPERATURE; OUTDOOR THERMAL COMFORT; THERMAL CONDITION; URBAN HEAT ISLAND; URBAN MICROCLIMATE; URBAN MORPHOLOGY; WARM HUMID CLIMATE; ASPECT RATIO; AIR TEMPERATURE; ARCHITECTURAL DESIGN; ARCHITECTURE; ASPECT; CLIMATE CHANGE; GEOMETRY; HEAT ISLAND; HISTORIC BUILDING;…	RENEW. ENERGY	ENGLISH			ELSEVIER LTD	2018	RODRÍGUEZ-ALGECIRAS, J.; DEPARTMENT OF ARCHITECTURE, CUBA; EMAIL: JOSERODRIGUEZALGECIRAS@GMAIL.COM	09601481	RENEWABLE ENERGY	38	INFLUENCE OF ASPECT RATIO AND ORIENTATION ON LARGE COURTYARD THERMAL CONDITIONS IN THE HISTORICAL CENTRE OF CAMAGÜEYCUBA	125	Camagüey, Cuba	21.3888	-77.9151	-	-
JOCHNER S;ALVES-EIGENHEER M;MENZEL A;MORELLATO L	THE STUDY OF URBAN PHENOLOGY IS RELEVANT TO ASSESS THE EFFECTS OF HEAT ISLANDS AND THE POTENTIAL IMPACTS OF CLIMATE CHANGE ON PLANTS. TEMPERATURE IS THE MAIN FACTOR REGULATING PLANT DEVELOPMENT IN MOIST/TEMPERATE REGIONS. HOWEVER, PLANTS IN TROPICAL CITIES MAY RESPOND TO ADDITIONAL ENVIRONMENTAL CUES, SUCH AS AIR HUMIDITY. WE EXAMINED WHETHER DIFFERENCES IN AIR TEMPERATURE AND HUMIDITY ALONG AN U…		TECH UNIV MUNICH, DEPT ECOL & ECOSYST MANAGEMENT, D-85354 FREISING WEIHENSTEPHAN, GERMANY.; UNIV ESTADUAL PAULISTA UNESP, PLANT PHENOL & SEED DISPERSAL GRP, INST BIOL, DEPT BOT,LAB FENOL, RIO CLARO, SP, BRAZIL.;	BBCH; BRAZIL; GERMANY; HUMIDITY; PHENOLOGY; TEMPERATURE; URBAN CLIMATE	10.1002/joc.3651	ARTICLE	DEUTSCHE FORSCHUNGSGEMEINSCHAFT (DFG) [ME 179/3-1]; EUROPA MOBEL-UMWELTSTIFTUNG; CAPES/PROBAL [360/11]; FAPESP (FUNDACAO DE APOIO A PESQUISA DO ESTADO DE SAO PAULO) [2009/54208-6]; CNPQ (COORDENACAO NACIONAL DE PESQUISA); DAAD (GERMAN ACADEMIC EXCHANGE SERVICE) [50752579]	THE RESEARCH CONDUCTED IN GERMANY WAS SUPPORTED BY THE GRANT ME 179/3-1 OF THE DEUTSCHE FORSCHUNGSGEMEINSCHAFT (DFG) AND THE EUROPA MOBEL-UMWELTSTIFTUNG; THE RESEARCH CONDUCTED IN BRAZIL BY CAPES/PROBAL (360/11), FAPESP (FUNDACAO DE APOIO A PESQUISA DO ESTADO DE SAO PAULO, 2009/54208-6), CNPQ (COORDENACAO NACIONAL DE PESQUISA) AND DAAD (GERMAN ACADEMIC EXCHANGE SERVICE, 50752579). MAE RECEIVED A …	CLIMATE-CHANGE; HUMAN HEALTH; SPRING TEMPERATURES; BIRCH POLLEN; URBANIZATION; RESPONSES; FOREST; DATES; IMPACT; AREAS	INT. J. CLIMATOL.	ENGLISH			WILEY	2013	JOCHNER, S (AUTOR CORRESPONDENTE), TECH UNIV MUNICH, DEPT ECOL & ECOSYST MANAGEMENT, HANS CARL VON CARLOWITZ PL 2, D-85354 FREISING WEIHENSTEPHAN, GERMANY.	0899-8418	INTERNATIONAL JOURNAL OF CLIMATOLOGY	35	USING PHENOLOGY TO ASSESS URBAN HEAT ISLANDS IN TROPICAL AND TEMPERATE REGIONS	33	Campinas, Brazil	-22.9329	-47.0738	-	-
MATTOS T;OLIVEIRA P;BRUNO L;CARVALHO G;PEREIRA R;CRIVELLARO L;LUCAS M;ROY T	WE DEVELOPED A DECISION SUPPORT SYSTEM (DSS) COUPLED WITH A FLOOD ALERT WEB APPLICATION AND EVALUATED IN THE PROSA BASIN (MIDWESTERN BRAZIL) TO SEND EARLY FLOOD WARNING MESSAGES TO ORDINARY PEOPLE. THE HYDROLOGIC ENGINEERING CENTER'S HYDROLOGIC MODELING SYSTEM (HEC-HMS) AND RIVER ANALYSIS SYSTEM (HEC-RAS) WERE USED AS THE CORE OF FLOOD ALERT SYSTEM. AS AN INPUT OF THE CALIBRATED HEC-HMS MODEL, WE…	105367	UNIV FED MATO GROSSO DO SUL, FAC ENGN ARCHITECTURE & URBANISM & GEOG, BR-79070900 CAMPO GRANDE, MS, BRAZIL.; UNIV FED MATO GROSSO DO SUL, FAC COMP, BR-79070900 CAMPO GRANDE, MS, BRAZIL.; UNIV TECNOL FED PARANA, DEPT CIVIL ENGN, BR-85502970 CURITIBA, PARANA, BRAZIL.; UNIV NEBRASKA, DEPT CIVIL & ENVIRONM ENGN, LINCOLN, NE 40255 USA.;	FLOOD ALERT; FLOOD PREDICTION; RUNOFF; STORMWATER	10.1016/j.envsoft.2022.105367	ARTICLE	MINISTRY OF SCIENCE, TECHNOLOGY, INNOVATION AND COMMUNICATION - MCTIC; NATIONAL COUNCIL FOR SCIENTIFIC AND TECHNOLOGICAL DEVELOPMENT - CNPQ [422947/2018-0, 309752/2020-5]; COORDENACAO DE APERFEICOAMENTO DE PESSOAL DE NIVEL SUPERIOR - BRASIL - CAPES [001]	THIS STUDY WAS SUPPORTED BY GRANTS FROM THE MINISTRY OF SCIENCE, TECHNOLOGY, INNOVATION AND COMMUNICATION - MCTIC AND NATIONAL COUNCIL FOR SCIENTIFIC AND TECHNOLOGICAL DEVELOPMENT - CNPQ (GRANTS422947/2018-0 AND 309752/2020-5) AND COORDENACAO DE APERFEICOAMENTO DE PESSOAL DE NIVEL SUPERIOR - BRASIL - CAPES (FINANCE CODE 001 AND CAPES PRINT).	ENSEMBLE PREDICTION SYSTEM; WEATHER RESEARCH; FORECASTING-MODEL; CLIMATE-CHANGE; FLASH-FLOOD; TIME; CHINA; PRECIPITATION; EVENT; MANAGEMENT	ENVIRON. MODELL. SOFTW.	ENGLISH			ELSEVIER SCI LTD	2022	OLIVEIRA, PTS (AUTOR CORRESPONDENTE), UNIV FED MATO GROSSO DO SUL, FAC ENGN ARCHITECTURE & URBANISM & GEOG, BR-79070900 CAMPO GRANDE, MS, BRAZIL.	1364-8152	ENVIRONMENTAL MODELLING & SOFTWARE	1	TOWARDS REDUCING FLOOD RISK DISASTERS IN A TROPICAL URBAN BASIN BY THE DEVELOPMENT OF FLOOD ALERT WEB APPLICATION	151	Campo Grande, Brazil	-20.4435	-54.6478	-	-
LI Y;SUN Y;LI J;GAO C	DOES SOCIOECONOMIC DEVELOPMENT RESULT IN EXACERBATION OF URBAN THERMAL ENVIRONMENT? THE ANSWER TO THIS QUESTION IS EXTREMELY CRITICAL FOR MITIGATING AND ADAPTING URBAN HEAT ISLAND EFFECT (UHI). HOWEVER, SUCH QUESTION HAS NOT YET BEEN FULLY UNDERSTOOD THE DETAILS. THE AIM OF THIS STUDY WAS TO MEASURE THE MAGNITUDES AND MARGINAL EFFECT OF SOCIOECONOMIC DRIVERS ON UHI DYNAMICS IN MAJOR CHINESE CITIE…	102425	HEILONGJIANG UNIV SCI & TECHNOL, SCH MIN ENGN, HARBIN 150022, PEOPLES R CHINA.; NINGBO UNIV, DEPT GEOG & SPATIAL INFORMAT TECH, NINGBO 315211, PEOPLES R CHINA.; NINGBO UNIV, INST EAST CHINA SEA, NINGBO 315211, PEOPLES R CHINA.;	URBAN HEAT ISLAND EFFECTS; URBAN SOCIOECONOMIC DEVELOPMENT; GENERALIZED ADDITIVE MODEL	10.1016/j.scs.2020.102425	ARTICLE	K.C. WONG MAGNA FUND IN NINGBO UNIVERSITY; CHINESE ACADEMY OF SCIENCES BASIC FRONTIER SCIENCE RESEARCH PROGRAM FROM 0 TO 1 ORIGINAL INNOVATION PROJECT "THE ATTRIBUTION AND GEOGRAPHICAL DIFFERENTIATION MECHANISM OF GLOBAL URBANIZATION ON CLIMATE CHANGE" [ZDBS-LYDQC005]	THIS WORK WAS SPONSORED BY K.C. WONG MAGNA FUND IN NINGBO UNIVERSITY AND THE CHINESE ACADEMY OF SCIENCES BASIC FRONTIER SCIENCE RESEARCH PROGRAM FROM 0 TO 1 ORIGINAL INNOVATION PROJECT "THE ATTRIBUTION AND GEOGRAPHICAL DIFFERENTIATION MECHANISM OF GLOBAL URBANIZATION ON CLIMATE CHANGE" (NO. ZDBS-LYDQC005). THE AUTHORS EXTEND THEIR APPRECIATION TO THE REVIEWERS WHO GAVE CONSTRUCTIVE COMMENTS THAT …	THERMAL ENVIRONMENT; CITY; TEMPERATURES; STRATEGIES; POLLUTION; CLIMATE; IMPACT; SCALE	SUST. CITIES SOC.	ENGLISH			ELSEVIER	2020	SUN, YW (AUTOR CORRESPONDENTE), NINGBO UNIV, DEPT GEOG & SPATIAL INFORMAT TECH, NINGBO 315211, PEOPLES R CHINA.	2210-6707	SUSTAINABLE CITIES AND SOCIETY	41	SOCIOECONOMIC DRIVERS OF URBAN HEAT ISLAND EFFECT EMPIRICAL EVIDENCE FROM MAJOR CHINESE CITIES	63	China	-	-	-	-
PERERA N;EMMANUEL R	INTEGRATING CLIMATE-SENSITIVE DESIGN WITH THE LOCAL PLANNING PROCESS IS FUNDAMENTAL TO MANAGING THE WARMING TREND IN THE GROWING HIGH-DENSITY TROPICAL CITIES. HOWEVER, THE CURRENT PLANNING REGIME IS YET TO ADDRESS THE CHALLENGES POSED BY LOCAL, REGIONAL AND GLOBAL WARMING. AN IN-DEPTH UNDERSTANDING OF THE INTERACTION BETWEEN THE PHYSICAL FORM AND THE CLIMATIC CONTEXT IS BEGINNING TO EMERGE BUT, D…		UNIV MORATUWA, DEPT ARCHITECTURE, MORATUWA, SRI LANKA.; GLASGOW CALEDONIAN UNIV, SCH ENGN & BUILT ENVIRONM, GLASGOW, LANARK, SCOTLAND.;	WARM HUMID TROPICS; LOCAL CLIMATE ZONE; URBAN PLANNING; CLIMATE SENSITIVE DESIGN	10.1016/j.uclim.2016.11.006	ARTICLE			OUTDOOR THERMAL COMFORT; HEAT-ISLAND; HUMID CITY; MICROCLIMATE; ADAPTATION; CITIES; DESIGN; HOT; INFORMATION; MANAGEMENT	URBAN CLIM.	ENGLISH			ELSEVIER	2018	PERERA, NGR (AUTOR CORRESPONDENTE), UNIV MORATUWA, DEPT ARCHITECTURE, MORATUWA, SRI LANKA.	2212-0955	URBAN CLIMATE	65	A LOCAL CLIMATE ZONE BASED APPROACH TO URBAN PLANNING IN COLOMBO SRI LANKA	23	Colombo, Sri Lanka	6.92708	79.8612	-	-
MENA-RIVERA L;SALGADO-SILVA V;BENAVIDES-BENAVIDES C;COTO-CAMPOS J;SWINSCOE T	WATER QUALITY ASSESSMENTS ARE ESSENTIAL FOR PROVIDING INFORMATION REGARDING INTEGRATED WATER RESOURCE MANAGEMENT PROCESSES. THIS STUDY PRESENTS THE RESULTS OF A SPATIAL AND SEASONAL SURFACE WATER QUALITY ASSESSMENT OF THE BURIO RIVER SUB-CATCHMENT IN COSTA RICA. FOURTEEN SAMPLE CAMPAIGNS WERE CONDUCTED AT EIGHT SAMPLE SITES BETWEEN 2005 AND 2010. SEASONAL VARIATIONS WERE EVALUATED USING LINEAR MI…	558	UNIV NACL, SCH CHEM, WATER RESOURCES MANAGEMENT LAB, HEREDIA 863000, COSTA RICA.;	MANAGEMENT; MONITORING; WATER QUALITY; WATER QUALITY INDEX	10.3390/w9080558	ARTICLE	RESEARCH OFFICE OF UNIVERSIDAD NACIONAL OF COSTA RICA [NX-053545]; MUNICIPALIDAD DE HEREDIA THROUGH THE INTEGRAL DEVELOPMENT ASSOCIATION OF SAN JORGE; MINISTRY OF SCIENCE, TECHNOLOGY AND TELECOMMUNICATIONS (MICITT) OF COSTA RICA	THIS PROJECT WAS FINANCIALLY SUPPORTED BY THE RESEARCH OFFICE OF UNIVERSIDAD NACIONAL OF COSTA RICA THROUGH GRANT NX-053545, THE MUNICIPALIDAD DE HEREDIA THROUGH THE INTEGRAL DEVELOPMENT ASSOCIATION OF SAN JORGE AND THE MINISTRY OF SCIENCE, TECHNOLOGY AND TELECOMMUNICATIONS (MICITT) OF COSTA RICA. THE AUTHORS THANK D. ROJAS-CANTILLANO, J. HERRERA-NUNEZ, F. ARIAS-GONZALEZ, A. MENDEZ-YESCA, S. CARV…	MULTIVARIATE STATISTICAL TECHNIQUES; MONITORING STATIONS; TEMPORAL TRENDS; SEDIMENT; GROUNDWATER; EFFICIENCY; NUTRIENT; PROGRAMS; NUMBER; BRAZIL	WATER	ENGLISH			MDPI AG	2017	MENA-RIVERA, L (AUTOR CORRESPONDENTE), UNIV NACL, SCH CHEM, WATER RESOURCES MANAGEMENT LAB, HEREDIA 863000, COSTA RICA.	2073-4441	WATER	33	SPATIAL AND SEASONAL SURFACE WATER QUALITY ASSESSMENT IN A TROPICAL URBAN CATCHMENT BURIO RIVER COSTA RICA	9	Costa Rica	-	-	-	-
LAU K;LINDBERG F;JOHANSSON E;RASMUSSEN M;THORSSON S	SOLAR ENERGY IS CONSIDERED TO BE AN ALTERNATIVE SUSTAINABLE ENERGY SOURCE IN THE URBAN ENVIRONMENT. THE POTENTIAL OF USING SOLAR ENERGY IN URBAN AREAS IS HIGHLY DEPENDENT ON URBAN MORPHOLOGY WHICH AFFECTS THE LEVEL OF SOLAR IRRADIANCE RECEIVED BY INDIVIDUAL BUILDINGS. MANY STUDIES FOCUS ON SOLAR ENERGY POTENTIAL OF BUILDING FORM IN URBAN AREAS BUT RELATIVELY FEW STUDIES EXAMINE HOW URBAN MORPHOLO…		CHINESE UNIV HONG KONG, INST FUTURE CITIES, HONG KONG, HONG KONG, PEOPLES R CHINA.; CHINESE UNIV HONG KONG, INST ENVIRONM ENERGY & SUSTAINABIL, HONG KONG, HONG KONG, PEOPLES R CHINA.; UNIV GOTHENBURG, DEPT EARTH SCI, GOTHENBURG, SWEDEN.; LUND UNIV, HOUSING DEV & MANAGEMENT, S-22100 LUND, SWEDEN.;	SOLAR ENERGY POTENTIAL; URBAN MORPHOLOGY; SOLAR IRRADIANCE; DEVELOPING COUNTRIES	10.1016/j.scs.2017.01.010	ARTICLE	SWEDISH RESEARCH COUNCIL	THIS WORK WAS SUPPORTED BY THE SWEDISH RESEARCH COUNCIL (VETENSKAPSRADET, VR). THE AUTHORS WOULD ALSO LIKE TO ACKNOWLEDGE MR ALPHA P. MANGULA FOR HIS CONTINUOUS ASSISTANCE IN COLLECTING FIELD DATA IN DAR ES SALAAM.	PROJECT; DESIGN; ELECTRIFICATION; PHOTOVOLTAICS; GENERATION; SCENARIOS; SETTINGS; FACADES	SUST. CITIES SOC.	ENGLISH			ELSEVIER SCIENCE BV	2017	LAU, KKL (AUTOR CORRESPONDENTE), CHINESE UNIV HONG KONG, INST FUTURE CITIES, SHATIN, HONG KONG, PEOPLES R CHINA.	2210-6707	SUSTAINABLE CITIES AND SOCIETY	19	INVESTIGATING SOLAR ENERGY POTENTIAL IN TROPICAL URBAN ENVIRONMENT A CASE STUDY OF DAR ES SALAAM TANZANIA	30	Dar es Salaam, Tanzania	-6.77601	39.1783	-	-
NIPEN M;VOGT R;BOHLIN-NIZZETTO P;BORGÅ K;MWAKALAPA E;BORGEN A;JØRGENSEN S;NTAPANTA S;MMOCHI A;SCHLABACH M;BREIVIK K	THERE ARE LARGE KNOWLEDGE GAPS CONCERNING ENVIRONMENTAL LEVELS AND FATE OF MANY ORGANIC POLLUTANTS, PARTICULARLY FOR CHEMICALS OF EMERGING CONCERN IN TROPICAL REGIONS OF THE GLOBAL SOUTH. IN THIS STUDY, WE INVESTIGATED THE LEVELS OF CHLORINATED PARAFFINS (CPS) AND DECHLORANES IN AIR AND SOIL IN RURAL, SUBURBAN, AND URBAN REGIONS IN AND AROUND DAR ES SALAAM, TANZANIA. SAMPLES WERE ALSO COLLECTED N…	118298	CENTRE FOR BIOGEOCHEMISTRY IN THE ANTHROPOCENE, DEPARTMENT OF CHEMISTRY, UNIVERSITY OF OSLO, P.O. BOX 1033, OSLO, 0315, NORWAY; NILU-NORWEGIAN INSTITUTE FOR AIR RESEARCH, P.O. BOX 100, KJELLER, 2027, NORWAY; CENTRE FOR BIOGEOCHEMISTRY IN THE ANTHROPOCENE, DEPARTMENT OF BIOSCIENCES, UNIVERSITY OF OSLO, P.O. BOX 1066, OSLO, 0316, NORWAY; DEPARTMENT OF NATURAL SCIENCES, MBEYA UNIVERSITY OF SCIENCE A…	E-WASTE; ENVIRONMENTAL FATE; MCCPS; PASSIVE AIR SAMPLING; SCCPS; URBAN PULSE	10.1016/j.envpol.2021.118298	ARTICLE	KIRKE-, UTDANNINGS- OG FORSKNINGSDEPARTEMENTETKIRKE-, UTDANNINGS- OG FORSKNINGSDEPARTEMENTET, KUF	THIS STUDY WAS CONDUCTED AS PART OF THE ANTHROTOX PROJECT, A CONVERGENCE ENVIRONMENT COMBINING SOCIAL AND NATURAL SCIENCES TO STUDY ANTHROPOGENIC TOXICANTS. THE ANTHROTOX PROJECT IS FUNDED THROUGH THE UNIVERSITY OF OSLO LIFE:SCIENCE INITIATIVE AND THE NORWEGIAN MINISTRY OF EDUCATION AND RESEARCH. WE THANK ANE HAARR, FRANZISKA KLAAS, AND SIGNE MIKKELSEN FOR THEIR CONTRIBUTIONS DURING FIELDWORK, AN…	ELECTRONIC EQUIPMENT; ELECTRONIC WASTE; ORGANIC CHEMICALS; ORGANIC POLLUTANTS; PARAFFINS; TROPICS; WASTES; CHLORINATED PARAFFINS; E-WASTES; ELECTRONICS WASTES; ENVIRONMENTAL FATE; MEDIUM CHAIN CP; PASSIVE AIR SAMPLINGS; SHORT CHAIN CP; SHORTER CHAINS; URBAN PULSE; WASTE HANDLING; SOILS; CHEMICAL COMPOUND; CHLORINE DERIVATIVE; DECHLORANE DERIVATIVE; MEDIUM CHAIN CHLORINATED PARAFFIN DERIVATIVE; PA…	ENVIRON. POLLUT.	ENGLISH	34626702		ELSEVIER LTD	2022	NIPEN, M.; CENTRE FOR BIOGEOCHEMISTRY IN THE ANTHROPOCENE, P.O. BOX 1033, NORWAY; EMAIL: MAJANIP@KJEMI.UIO.NO	02697491	ENVIRONMENTAL POLLUTION	3	SPATIAL TRENDS OF CHLORINATED PARAFFINS AND DECHLORANES IN AIR AND SOIL IN A TROPICAL URBAN SUBURBAN AND RURAL ENVIRONMENT	292	Dar es Salaam, Tanzania	-6.77601	39.1783	-	-
SCARBOROUGH V;ISENDAHL C	IDENTIFYING AND EMPLOYING THE CONCEPT OF SUSTAINABILITY IN THE SOCIAL SCIENCES REMAIN A CHALLENGE. ONE APPROACH PRESENTED HERE EMPHASIZES ITS UTILITY IN EXAMINING PAST URBAN ADAPTATIONS PRIMARILY FROM THE ARCHAEOLOGICAL RECORD THAT DEMONSTRATE THE ROLE OF LOW-DENSITY URBANISM. DRAWING UPON EARLY SEMITROPICAL CITIES AND THEIR DISPERSED LAND-USE AND SETTLEMENT PATTERNS, BOTH LONGEVITY AND INTERCONN…	2053019620919242	UNIV CINCINNATI, CINCINNATI, OH 45221 USA.; UNIV GOTHENBURG, GOTHENBURG, SWEDEN.;	ARCHAEOLOGY; CLIMATE CHANGE; LOW-DENSITY CITIES; TROPICAL ECOSYSTEMS; URBAN FUTURES	10.1177/2053019620919242	ARTICLE			SEA-LEVEL RISE; FOOD SECURITY; LOW-DENSITY; LANDSCAPES; ANGKOR; MAYA; CITIES	ANTHR. REV.	ENGLISH			SAGE PUBLICATIONS INC	2020	ISENDAHL, C (AUTOR CORRESPONDENTE), UNIV GOTHENBURG, DEPT HIST STUDIES, BOX 200, SE-40530 GOTHENBURG, SWEDEN.	2053-0196	ANTHROPOCENE REVIEW	9	DISTRIBUTED URBAN NETWORK SYSTEMS IN THE TROPICAL ARCHAEOLOGICAL RECORD TOWARD A MODEL FOR URBAN SUSTAINABILITY IN THE ERA OF CLIMATE CHANGE	7	Early tropical cities	-	-	-	-
TABUCANON A;KURISU K;HANAKI K	CLIMATE CHANGE-INDUCED FLOODS IN TROPICAL URBAN AREAS HAVE PRESENTED A SERIOUS GLOBAL CHALLENGE BECAUSE OF FAILED CONVENTIONAL STORMWATER MANAGEMENT PRACTICES. THIS RESEARCH AIMS TO DEVELOP A COMPREHENSIVE METHODOLOGICAL FRAMEWORK FOR FLOOD DAMAGE ESTIMATION AND MITIGATION, PARTICULARLY IN A TROPICAL URBAN CITY. IN THIS STUDY, INTERDISCIPLINARY FIELDS WERE INTEGRATED THROUGH STATISTICAL DOWNSCALI…	147983	UNIV TOKYO, DEPT URBAN ENGN, BUNKYO KU, 7-3-1 HONGO, TOKYO 1138656, JAPAN.;	GENERAL CIRCULATION MODEL; HYDROLOGIC-HYDRAULIC MODEL; STATISTICAL DOWNSCALING; URBAN FLOOD DAMAGE; FLOOD-BORNE DISEASES; FLOOD MITIGATION	10.1016/j.scitotenv.2021.147983	ARTICLE	UNIVERSITY OF TOKYO	THEWORK IS DONE BY THE SUPPORT OF THE UNIVERSITY OF TOKYO, AS PART OF PH.D. STUDY. THERE IS NO GRANTING NUMBER.	EXTREME PRECIPITATION; UNCERTAINTY ANALYSIS; LAND MANAGEMENT; AGROFORESTRY; TEMPERATURE; ADAPTATION; SIMULATION; IMPACTS; EVENTS; TRENDS	SCI. TOTAL ENVIRON.	ENGLISH	34082213		ELSEVIER	2021	TABUCANON, AS (AUTOR CORRESPONDENTE), MAHIDOL UNIV, FAC ENVIRONM & RESOURCE STUDIES, 999 PHUTTHAMONTHON 4 RD, SALAYA 73170, NAKHON PATHOM, THAILAND.	0048-9697	SCIENCE OF THE TOTAL ENVIRONMENT	3	ASSESSMENT AND MITIGATION OF TANGIBLE FLOOD DAMAGES DRIVEN BY CLIMATE CHANGE IN A TROPICAL CITY HAT YAI MUNICIPALITY SOUTHERN THAILAND	789	Hat yai, Thailand	7.00836	100.477	-	-
CHEN L;NG E;AN X;REN C;LEE M;WANG U;HE Z	HONG KONG IS A HIGH-DENSITY SUB-TROPICAL CITY WITH 7 MILLION PEOPLE LIVING IN AN URBAN AREA OF JUST OVER 260 KM(2). TALL AND CLOSELY PACKED BUILDINGS ARE THE COMMON URBAN MORPHOLOGY. HOW THE URBAN GEOMETRY INFLUENCES THE MICROCLIMATE IN SUMMER DAYTIME IS A PRIMARY PLANNING CONCERN. THE SKY VIEW FACTOR (SVF) HAS BEEN COMMONLY USED TO INDICATE THE IMPACT OF URBAN GEOMETRY ON AIR TEMPERATURE DIFFERE…		CHINESE UNIV HONG KONG, SCH ARCHITECTURE, SHATIN, HONG KONG, PEOPLES R CHINA.;	SKY VIEW FACTOR (SVF); URBAN CLIMATE; INTRA-URBAN AIR TEMPERATURE DIFFERENCE; GEOGRAPHIC INFORMATION SYSTEM (GIS)	10.1002/joc.2243	ARTICLE	CHINESE UNIVERSITY OF HONG KONG; PLANNING DEPARTMENT OF THE GOVERNMENT OF HONG KONG S. A. R	THE STUDY IS SUPPORTED BY A PGS GRANT FROM THE CHINESE UNIVERSITY OF HONG KONG AND A CONTRACT RESEARCH GRANT FROM THE PLANNING DEPARTMENT OF THE GOVERNMENT OF HONG KONG S. A. R. THE AUTHORS WISH TO THANK THE PLANNING DEPARTMENT OF HONG KONG FOR PROVIDING THE BUILDING DATA AND THE HONG KONG OBSERVATORY FOR THE WEATHER DATA NEEDED FOR THE STUDY. IN PARTICULAR, THE AUTHORS WISH TO THANK MR MARCIN RZ…	HEAT-ISLAND INTENSITY; LAND-COVER; GEOMETRY; CLIMATE; APPROXIMATION; ENVIRONMENTS; DATABASE; SWEDEN; CITIES	INT. J. CLIMATOL.	ENGLISH			WILEY-BLACKWELL	2012	CHEN, L (AUTOR CORRESPONDENTE), CHINESE UNIV HONG KONG, SCH ARCHITECTURE, ROOM 701,WONG FOO YUEN BLDG, SHATIN, HONG KONG, PEOPLES R CHINA.	0899-8418	INTERNATIONAL JOURNAL OF CLIMATOLOGY	234	SKY VIEW FACTOR ANALYSIS OF STREET CANYONS AND ITS IMPLICATIONS FOR DAYTIME INTRAURBAN AIR TEMPERATURE DIFFERENTIALS IN HIGHRISE HIGHDENSITY URBAN AREAS OF HONG KONG A GISBASED SIMULATION APPROACH	32	Hong Kong	22.3964	114.109	-	-
KABANO P;LINDLEY S;HARRIS A	KNOWLEDGE ABOUT THE IMPACTS OF URBAN HEAT ISLANDS (UHI) AND ASSOCIATED THERMAL GRADIENTS ON VEGETATION SEASONALITY (I.E. PHENOLOGY) IS VITAL FOR UNDERSTANDING SPATIAL PATTERNS IN VEGETATION ECOSYSTEM FUNCTIONS. HOWEVER, IN CONTRAST TO TEMPERATE CITES, THERE IS LITTLE EVIDENCE TO SHOW HOW UHI INFLUENCES LANDSCAPE PHENOLOGICAL PROCESSES IN THE TROPICS. IN THIS STUDY, WE EXAMINED VEGETATION PHENOLOG…	103989	UNIV MANCHESTER, SCH ENVIRONM EDUC & DEV, DEPT GEOG, OXFORD RD, MANCHESTER, LANCS, ENGLAND.; UNIV TWENTE, DEPT URBAN & REG PLANNING & GEOINFORMAT MANAGEMEN, FAC GEOINFORMAT SCI & EARTH OBSERVAT ITC, ENSCHEDE, NETHERLANDS.;	TROPICS; LOCAL CLIMATE ZONES; LANDSCAPE PHENOLOGY; LAND SURFACE TEMPERATURE; URBAN HEAT ISLAND	10.1016/j.landurbplan.2020.103989	ARTICLE	COMMONWEALTH SCHOLARSHIP COMMISSION; PRINCE ALBERT II OF MONACO THROUGH AN INTERGOVERNMENTAL PANEL FOR CLIMATE CHANGE SCHOLARSHIP AWARD	WE THANK THE MANUSCRIPT REVIEWERS FOR THEIR HELPFUL SUGGESTIONS. THIS RESEARCH WAS FUNDED BY THE COMMONWEALTH SCHOLARSHIP COMMISSION AND PRINCE ALBERT II OF MONACO THROUGH AN INTERGOVERNMENTAL PANEL FOR CLIMATE CHANGE SCHOLARSHIP AWARD.	LOCAL CLIMATE ZONES; GREEN INFRASTRUCTURE; ECOSYSTEM SERVICES; PHENOLOGY; TEMPERATURE; INTENSITY; CITIES; COVER	LANDSC. URBAN PLAN.	ENGLISH			ELSEVIER	2021	KABANO, P (AUTOR CORRESPONDENTE), UNIV MANCHESTER, SCH ENVIRONM EDUC & DEV, DEPT GEOG, OXFORD RD, MANCHESTER, LANCS, ENGLAND.; KABANO, P (AUTOR CORRESPONDENTE), UNIV TWENTE, DEPT URBAN & REG PLANNING & GEOINFORMAT MANAGEMEN, FAC GEOINFORMAT SCI & EARTH OBSERVAT ITC, ENSCHEDE, NETHERLANDS.	0169-2046	LANDSCAPE AND URBAN PLANNING	29	EVIDENCE OF URBAN HEAT ISLAND IMPACTS ON THE VEGETATION GROWING SEASON LENGTH IN A TROPICAL CITY	206	Kampala, Uganda	0.347596	32.5825	-	-
LEE J;WASSERMAN R;GAN J;WILSON R;RAHMAN S;YEK S	KNOWLEDGE OF THE INTERRELATIONSHIP OF MOSQUITO COMMUNITIES AND LAND USE CHANGES IS OF PARAMOUNT IMPORTANCE TO UNDERSTAND THE POTENTIAL RISK OF MOSQUITO DISEASE TRANSMISSION. THIS STUDY EXAMINED THE EFFECTS OF LAND USE TYPES IN URBAN, PERI-URBAN AND NATURAL LANDSCAPES ON MOSQUITO COMMUNITY STRUCTURE TO TEST WHETHER THE URBAN LANDSCAPE IS IMPLICATED IN INCREASED PREVALENCE OF POTENTIALLY HARMFUL MO…		MONASH UNIV MALAYSIA, SCH SCI, BLDG 4,LEVEL 8,ROOM 36 4-8-36, BANDAR SUNWAY 47500, SELANGOR DARUL, MALAYSIA.; BOTSWANA INT UNIV SCI & TECHNOL, DEPT BIOL & BIOTECHNOL, PALAPYE, BOTSWANA.; MONASH UNIV MALAYSIA, TROP MED & BIOL PLATFORM, JALAN LAGOON SELATAN, BANDAR SUNWAY 47500, SELANGOR DARUL, MALAYSIA.;	AEDES ALBOPICTUS; ANTHROPOGENIC ACTIVITY; COMMUNITY STRUCTURE; ENVIRONMENTAL MANAGEMENT; LAND USE; MOSQUITO LARVAL HABITAT	10.1007/s10393-019-01457-9	ARTICLE	TROPICAL MEDICINE AND BIOLOGY PLATFORM; SCHOOL OF SCIENCE PHD FELLOWSHIP; SCHOOL OF SCIENCE SEED GRANT	THIS WORK WAS PART OF THE RESEARCH FOR PH.D. BY LJM AT MONASH UNIVERSITY MALAYSIA (MUM) FUNDED BY TROPICAL MEDICINE AND BIOLOGY PLATFORM TO RS, SCHOOL OF SCIENCE PHD FELLOWSHIP TO LJM AND SCHOOL OF SCIENCE SEED GRANT TO YSH.	LAND-USE CHANGE; AEDES-ALBOPICTUS SKUSE; RESIDENTIAL AREAS; URBANIZATION; DENGUE; POPULATION; DYNAMICS; BEHAVIOR; FOREST; RISK	ECOHEALTH	ENGLISH	31786667		SPRINGER	2020	YEK, SH (AUTOR CORRESPONDENTE), MONASH UNIV MALAYSIA, SCH SCI, BLDG 4,LEVEL 8,ROOM 36 4-8-36, BANDAR SUNWAY 47500, SELANGOR DARUL, MALAYSIA.	1612-9202	ECOHEALTH	13	HUMAN ACTIVITIES ATTRACT HARMFUL MOSQUITOES IN A TROPICAL URBAN LANDSCAPE	17	Klang Valley, Malaysia	3.15619	101.802	-	-
HASAN H;RAZALI S;ZAKI A;HAMZAH F	IN RECENT DECADES, MALAYSIA HAS BECOME ONE OF THE WORLD'S MOST URBANIZED NATIONS, CAUSING SEVERE FLASH FLOODING. URBANIZATION SHOULD MEET THE POPULATION'S NEEDS BY INCREASING THE DEVELOPMENT OF PAVED AREAS, WHICH HAS SIGNIFICANTLY CHANGED THE CATCHMENT'S HYDROLOGICAL AND HYDRAULIC CHARACTERISTICS. THEREFORE, THE FREQUENCY OF FLASH FLOODING IN MALAYSIA'S URBAN AREAS HAS GROWN YEAR AFTER YEAR. NUME…	6700	UNIV KEBANGSAAN MALAYSIA, FAC ENGN & BUILT ENVIRONM, SMART & SUSTAINABLE TOWNSHIP RES CTR, BANGI 43600, SELANGOR, MALAYSIA.; ZHL ENGINEERS SDN BHD, PRESINT DIPLOMATIK 15, PUTRAJAYA 62502, MALAYSIA.;	FLOOD PREDICTION; URBAN FLOOD; XPSWMM; TROPICAL CATCHMENT; STORMWATER MANAGEMENT	10.3390/su11236700	ARTICLE	MINISTRY OF EDUCATION MALAYSIA [FRGS/1/2018/TK01/UKM/02/2]	THIS WORK WAS PARTIALLY SUPPORTED BY THE MINISTRY OF EDUCATION MALAYSIA RESEARCH GRANT FRGS/1/2018/TK01/UKM/02/2 AND IS GRATEFULLY ACKNOWLEDGED.	LOW IMPACT DEVELOPMENT; CLIMATE-CHANGE; SWMM; RISK; URBANIZATION; BASIN; RIVER; AREA; CITY; TOOL	SUSTAINABILITY	ENGLISH			MDPI	2019	RAZALI, SFM (AUTOR CORRESPONDENTE), UNIV KEBANGSAAN MALAYSIA, FAC ENGN & BUILT ENVIRONM, SMART & SUSTAINABLE TOWNSHIP RES CTR, BANGI 43600, SELANGOR, MALAYSIA.		SUSTAINABILITY	13	INTEGRATED HYDROLOGICALHYDRAULIC MODEL FOR FLOOD SIMULATION IN TROPICAL URBAN CATCHMENT	11	Klang Valley, Malaysia	3.15619	101.802	-	-
CHATTERJEE S;KHAN A;DINDA A;MITHUN S;KHATUN R;AKBARI H;KUSAKA H;MITRA C;BHATTI S;DOAN Q;WANG Y	TROPICAL CITIES ARE MORE SUSCEPTIBLE TO THE SUGGESTED FALL OUTS FROM PROJECTED GLOBAL WARMING SCENARIOS AS THEY ARE LOCATED IN THE TORRID ZONE AND GROWING AT RAPID RATES. THEREFORE, RESEARCH ON THE MITIGATION OF URBAN HEAT ISLAND (UHI) EFFECTS IN TROPICAL CITIES HAS ATTAINED MUCH SIGNIFICANCE AND INCREASED IMMENSELY OVER RECENT YEARS. THE UHI MITIGATION STRATEGIES COMMONLY USED FOR TEMPERATE CITI…		PRESIDENCY UNIV, DEPT GEOG, KOLKATA, INDIA.; LALBABA COLL, DEPT GEOG, HOWRAH, INDIA.; VIDYASAGAR UNIV, DEPT GEOG & ENVIRONM MANAGEMENT, MIDNAPORE, INDIA.; HALDIA GOVT COLL, DEPT GEOG, HALDIA, INDIA.; JADAVPUR UNIV, SCH OCEANOG STUDIES, KOLKATA, INDIA.; CONCORDIA UNIV, HEAT ISL GRP, BLDG CIVIL & ENVIRONM ENGN, MONTREAL, PQ, CANADA.; UNIV TSUKUBA, CTR COMPUTAT SCI, TSUKUBA, IBARAKI, JAPAN.; AUBURN …	URBAN MICRO-CLIMATE; UHI MITIGATION STRATEGIES; ENVI-MET V 4.0; COOL CITY MODEL; PHYSIOLOGICALLY EQUIVALENT TEMPERATURE (PET)	10.1016/j.scitotenv.2019.01.299	ARTICLE	FACULTY RESEARCH AND PERSONAL DEVELOPMENT FUND, PRESIDENCY UNIVERSITY	WE APPRECIATE INSIGHTFUL SUGGESTIONS RECEIVED FROM IAIN DOUGLAS STEWART, GLOBAL CITIES INSTITUTE, UNIVERSITY OF TORONTO, CANADA IN IMPROVING THE SCIENTIFIC QUALITY OF THE ARTICLE. WE GREATLY APPRECIATE THE TREMENDOUS SUPPORT RECEIVED FROM THE EDITORIAL BOARD OF THE SCIENCE OF THE TOTAL ENVIRONMENT (STOTEN) ESPECIALLY FROM JOSE VIRGILIO MATOS FIGUEIRA CRUZ, ASSOCIATE EDITOR, IN COURSE OF THE REVIE…	LAND-SURFACE TEMPERATURE; COOL PAVEMENT MATERIAL; SYNOPTIC CONDITIONS; ENERGY SAVINGS; TROPICAL CITY; SENSED DATA; HUMID CITY; ENVI-MET; COMFORT; CLIMATE	SCI. TOTAL ENVIRON.	ENGLISH	30731408		ELSEVIER	2019	KHAN, A (AUTOR CORRESPONDENTE), LALBABA COLL, DEPT GEOG, HOWRAH, INDIA.	0048-9697	SCIENCE OF THE TOTAL ENVIRONMENT	42	SIMULATING MICROSCALE THERMAL INTERACTIONS IN DIFFERENT BUILDING ENVIRONMENTS FOR MITIGATING URBAN HEAT ISLANDS	663	Kolkata, India	22.5726	88.3639	-	-
OOI M;CHAN A;ASHFOLD M;OOZEER M;MORRIS K;KONG S	THE MODIFICATION OF LAND USE IS KNOWN TO BE A MAJOR CLIMATE CHANGE DRIVER TO THE LOCAL WARMING AND AIR QUALITY IN CITIES. DESPITE THE REDUCTION OF NOX OVER THE YEARS, THE SELANGOR STATE HAS CAPTURED A HIGHER LEVEL OF O-3 IN YEAR 2011. THE MEASUREMENT RESULT HAS SHOWN THAT THE SURGE IN O-3 LEVEL WAS ATTRIBUTED TO THE REDUCTION OF NOX/NMHC RATIO. THIS PAPER HENCE ATTEMPTED TO IDENTIFY THE ROLE OF L…		NATL CENT UNIV, DEPT ATMOSPHER SCI, CHUNGLI, CHINESE TAIPEI, TAIWAN.; UNIV NOTTINGHAM MALAYSIA CAMPUS, DEPT CIVIL ENGN, SEMENYIH, MALAYSIA.; UNIV NOTTINGHAM MALAYSIA CAMPUS, SCH ENVIRONM & GEOG SCI, SEMENYIH, MALAYSIA.; CESIRI, PORT HARCOURT, RIVERS STATE, NIGERIA.; ASHESI UNIV COLL, DEPT MECH ENGN, BEREKUSO, GHANA.; UNIV WATERLOO, DEPT GEOG & ENVIRONM MANAGEMENT, WATERLOO, ON, CANADA.;	LAND USE CHANGE; URBAN; GROUND OZONE; TVOC; WRF-CHEM; TROPICS	10.1016/j.gsf.2018.04.005	ARTICLE	MINISTRY OF SCIENCE TECHNOLOGY AND INNOVATION (MOSTI) OF MALAYSIA [06-02-12-SF0346]; UNIVERSITY OF NOTTINGHAM MALAYSIA CAMPUS	THE AUTHORS WOULD LIKE TO THANK THE MINISTRY OF SCIENCE TECHNOLOGY AND INNOVATION (MOSTI) OF MALAYSIA FOR PROVIDING FINANCIAL SUPPORT FOR THIS RESEARCH WORK. THIS WORK IS PARTLY SPONSORED UNDER CONTRACT NO. 06-02-12-SF0346. THE AUTHORS WOULD ALSO LIKE TO THANK UNIVERSITY OF NOTTINGHAM MALAYSIA CAMPUS FOR AWARDING A RESEARCH SCHOLARSHIP. WE ARE ALSO GRATEFUL FOR ACCESS TO THE UNIVERSITY OF NOTTING…	URBAN HEAT-ISLAND; OZONE CONCENTRATIONS; BOUNDARY-LAYER; KLANG VALLEY; MODEL; IMPACTS; URBANIZATION; RESOLUTION; HYDROCARBONS; ENVIRONMENT	GEOSCI. FRONT.	ENGLISH			CHINA UNIV GEOSCIENCES, BEIJING	2019	OOI, MCG (AUTOR CORRESPONDENTE), UNIV NOTTINGHAM MALAYSIA CAMPUS, DEPT CIVIL ENGN, SEMENYIH, MALAYSIA.	1674-9871	GEOSCIENCE FRONTIERS	13	THE ROLE OF LAND USE ON THE LOCAL CLIMATE AND AIR QUALITY DURING CALM INTERMONSOON IN A TROPICAL CITY	10	Kuala Lumpur, Malaysia	3.139	101.687	-	-
AKTAS Y;WANG K;ZHOU Y;OTHMAN M;STOCKER J;JACKSON M;HOOD C;CARRUTHERS D;LATIF M;D'AYALA D;HUNT J	HIGH AIR TEMPERATURE AND HIGH HUMIDITY, COMBINED WITH LOW WIND SPEEDS, ARE COMMON TRENDS IN THE TROPICAL URBAN CLIMATES, WHICH COLLECTIVELY GOVERN HEAT-INDUCED HEALTH RISKS AND OUTDOOR THERMAL COMFORT UNDER THE GIVEN HYGROTHERMAL CONDITIONS. THE IMPACT OF DIFFERENT URBAN LAND-USES ON AIR TEMPERATURES IS WELL-DOCUMENTED BY MANY STUDIES FOCUSING ON THE URBAN HEAT ISLAND PHENOMENON; HOWEVER, AN INTE…	652	UNIV COLL LONDON UCL, DEPT CIVIL ENVIRONM & GEOMAT ENGN CEGE, LONDON WC1E 6BT, ENGLAND.; UNIV KEBANGSAAN MALAYSIA, INST ENVIRONM & DEV LESTARI, BANGI 43600, MALAYSIA.; CAMBRIDGE ENVIRONM RES CONSULTANTS CERC, CAMBRIDGE CB2 1SJ, ENGLAND.; UNIV KEBANGSAAN MALAYSIA, DEPT EARTH SCI & ENVIRONM, BANGI 43600, MALAYSIA.; UNIV COLL LONDON UCL, EARTH SCI, LONDON WC1E 6BT, ENGLAND.;	THERMAL COMFORT; LAND-USE; TROPICS; URBAN MICROCLIMATE	10.3390/atmos11060652	ARTICLE	INNOVATE UK UNDER THE MALAYSIA-UK RESEARCH AND INNOVATION BRIDGES COMPETITION FOR COLLABORATIVE RD; EPSRC UNDER THE MALAYSIA-UK RESEARCH AND INNOVATION BRIDGES COMPETITION FOR COLLABORATIVE RD; EPSRC [EP/P015506/1, EP/P015476/1]; INNOVATE UK [102718]; NEWTON-UNGKU OMAR FUND [XX-2017-002]; UCL EPSRC IMPACT ACCELERATION AWARD [EP/R511638/1]	THIS STUDY WAS CARRIED OUT AS PART OF (A) "FUTURE CITIES-DISASTER RESILIENT CITIES: FORECASTING LOCAL LEVEL CLIMATE EXTREMES AND PHYSICAL HAZARDS FOR KUALA LUMPUR," JOINTLY FUNDED BY INNOVATE UK AND EPSRC UNDER THE MALAYSIA-UK RESEARCH AND INNOVATION BRIDGES COMPETITION FOR COLLABORATIVE R & D; Y.D.A., K.W. AND D.D. BY EPSRC GRANT REF. EP/P015506/1; J.H. BY EPSRC GRANT REF. EP/P015476/1; J.S., M.…	URBAN HEAT-ISLAND; CASE-CROSSOVER; TEMPERATURE; MORTALITY; CITY; SCALE; VULNERABILITY; KAMPUNG; IMPACT	ATMOSPHERE	ENGLISH			MDPI	2020	AKTAS, YD (AUTOR CORRESPONDENTE), UNIV COLL LONDON UCL, DEPT CIVIL ENVIRONM & GEOMAT ENGN CEGE, LONDON WC1E 6BT, ENGLAND.		ATMOSPHERE	8	OUTDOOR THERMAL COMFORT AND BUILDING ENERGY USE POTENTIAL IN DIFFERENT LANDUSE AREAS IN TROPICAL CITIES CASE OF KUALA LUMPUR	11	Kuala Lumpur, Malaysia	3.139	101.687	-	-
ISA N;WAN M W;SALLEH S;GEE O M;CHAN A	PHYSICAL GEOGRAPHY AND URBAN CHARACTERISTICS INFLUENCE THE URBAN CLIMATE CONDITIONS. BUILT-UP AREAS, GREEN URBAN PARKS, FOREST RESERVES, STREETS AND TERRAIN CONSTITUTE THE CLIMATIC INTERACTIONS WITHIN URBAN AREAS. THESE HAVE LED TO THE VARIATION OF THE URBAN CLIMATE CONDITION THROUGHOUT THE WORLD. THUS, IN STUDYING URBAN CLIMATE, THE IMPACTS OF THESE FACTORS ARE CRUCIAL TO BE EXAMINED. THIS STUDY…		UNIV TEKNOL MARA, SHAH ALAM, SELANGOR, MALAYSIA.; NATL CENT UNIV, TAOYUAN, TAIWAN.; UNIV NOTTINGHAM, SEMENYIH, MALAYSIA.;	URBAN CLIMATE; URBAN PARAMETERS; AIR SURFACE TEMPERATURE; TROPICAL CLIMATE; KUALA LUMPUR	10.37043/JURA.2020.12.1.6	ARTICLE	UNIVERSITI TEKNOLOGI MARA (UITM) [600-IRMI/DANA 5/3 BESTARI (P) (074/2018)]	THE AUTHORS WOULD LIKE TO EXPRESS THEIR GRATITUDE TO THE UNIVERSITI TEKNOLOGI MARA (UITM) FOR FUNDING THIS PROJECT UNDER GERAN BESTARI PERDANA 600-IRMI/DANA 5/3 BESTARI (P) (074/2018).	URBAN HEAT-ISLAND; LATERAL BOUNDARY-CONDITIONS; CLIMATE; TEMPERATURE; RESOLUTION	J. URBAN REG. ANAL.	ENGLISH			BUCHAREST UNIV PRESS	2020	SALLEH, SA (AUTOR CORRESPONDENTE), UNIV TEKNOL MARA, FAC ARCHITECTURE PLANNING & SURVEYING, CTR STUDIES SURVEYING SCI & GEOMAT, SHAH ALAM 40450, SELANGOR, MALAYSIA.	2067-4082	JOURNAL OF URBAN AND REGIONAL ANALYSIS	0	LAND COVER IMPACTS TOWARDS THERMAL VARIATION IN THE KUALA LUMPUR CITY	12	Kuala Lumpur, Malaysia	3.139	101.687	-	-
OTHMAN F;ELDIN M;MOHAMED I	RIVERS PLAY A SIGNIFICANT ROLE IN PROVIDING WATER RESOURCES FOR HUMAN AND ECOSYSTEM SURVIVAL AND HEALTH. HENCE, RIVER WATER QUALITY IS AN IMPORTANT PARAMETER THAT MUST BE PRESERVED AND MONITORED. AS THE STATE OF SELANGOR AND THE CITY OF KUALA LUMPUR, MALAYSIA, ARE UNDERGOING TREMENDOUS DEVELOPMENT, THE RIVER IS SUBJECTED TO POLLUTION FROM POINT AND NON-POINT SOURCES. THE WATER QUALITY OF THE KLAN…		UNIV MALAYA, FAC ENGN, DEPT CIVIL ENGN, KUALA LUMPUR, MALAYSIA.; UNIV MALAYA, FAC SCI, INST MATH SCI, KUALA LUMPUR, MALAYSIA.;		10.1039/c2em30676j	ARTICLE	UNIVERSITY OF MALAYA RESEARCH GRANT (UMRG)	WE WOULD LIKE TO EXPRESS OUR THANKS TO THE DEPARTMENT OF IRRIGATION AND DRAINAGE, AND THE DEPARTMENT OF ENVIRONMENT, MALAYSIA FOR THEIR CO-OPERATION IN PERFORMING THIS STUDY. WE WOULD ALSO LIKE TO EXPRESS OUR GRATITUDE TO THE UNIVERSITY OF MALAYA RESEARCH GRANT (UMRG) FOR SUPPORTING THIS STUDY. WE ARE MOST GRATEFUL AND WOULD LIKE TO THANK THE REVIEWERS FOR THEIR VALUABLE SUGGESTIONS, WHICH LED TO…	LAND-USE; INDEX; MANAGEMENT; POLLUTION; GIS	J. ENVIRON. MONIT.	ENGLISH	23128415		ROYAL SOC CHEMISTRY	2012	OTHMAN, F (AUTOR CORRESPONDENTE), UNIV MALAYA, FAC ENGN, DEPT CIVIL ENGN, KUALA LUMPUR, MALAYSIA.	1464-0325	JOURNAL OF ENVIRONMENTAL MONITORING	46	TREND ANALYSIS OF A TROPICAL URBAN RIVER WATER QUALITY IN MALAYSIA	14	Kuala Lumpur, Malaysia	3.139	101.687	-	-
ZHANG J;GIANNIS A;CHANG V;NG B;WANG J	SOURCE-SEPARATING URINE FROM OTHER DOMESTIC WASTEWATERS PROMOTES A MORE SUSTAINABLE MUNICIPAL WASTEWATER TREATMENT SYSTEM. THIS STUDY INVESTIGATED THE FEASIBILITY AND POTENTIAL ISSUES OF APPLYING A URINE SOURCE-SEPARATION SYSTEM IN TROPICAL URBAN SETTINGS. THE RESULTS SHOWED THAT SOURCE-SEPARATED URINE UNDERWENT RAPID UREA-HYDROLYSIS (UREOLYSIS) AT TEMPERATURES BETWEEN 3440(O)C, STALE/FRESH URINE…		NANYANG TECHNOL UNIV, SCH CIVIL & ENVIRONM ENGN, DIV ENVIRONM & WATER RESOURCES, SINGAPORE 639798, SINGAPORE.; NANYANG TECHNOL UNIV, NANYANG ENVIRONM & WATER RES INST, RESIDUES & RESOURCE RECLAMAT CTR, SINGAPORE 639798, SINGAPORE.;		10.1080/10962247.2013.763306	ARTICLE	NATIONAL RESEARCH FOUNDATION, SINGAPORE [NRF-CRP5-2009-02]	THIS STUDY IS SUPPORTED BY THE NATIONAL RESEARCH FOUNDATION, SINGAPORE: PROGRAM NUMBER NRF-CRP5-2009-02 FOR THE SCHOOL OF CIVIL AND ENVIRONMENTAL ENGINEERING/RESIDUES AND RESOURCE RECLAMATION CENTRE, NANYANG TECHNOLOGICAL UNIVERSITY, SINGAPORE.	MUNICIPAL WASTE-WATER; STRUVITE PRECIPITATION; DESORPTION; MANAGEMENT; ADSORPTION; RECOVERY; RELEASE	J. AIR WASTE MANAGE. ASSOC.	ENGLISH	23687732		TAYLOR & FRANCIS INC	2013	CHANG, VWC (AUTOR CORRESPONDENTE), NANYANG TECHNOL UNIV, SCH CIVIL & ENVIRONM ENGN, DIV ENVIRONM & WATER RESOURCES, 50 NANYANG AVE, SINGAPORE 639798, SINGAPORE.	1096-2247	JOURNAL OF THE AIR & WASTE MANAGEMENT ASSOCIATION	27	ADAPTATION OF URINE SOURCE SEPARATION IN TROPICAL CITIES PROCESS OPTIMIZATION AND ODOR MITIGATION	63	Lab-scale experiments in a tropical urban setting	-	-	-	-
MARINHO C;BREVES A;ROCHA A;DA S E;VAN W M;GUTEMBERG A;AMORA-NOGUEIRA L;MAROTTA H;MEIRELLES-PEREIRA F;ENRICH-PRAST A;ESTEVES F	THE PRESENT STUDY INVESTIGATED THE INTRA-ECOSYSTEM VARIABILITY OF NUTRIENT ENRICHMENT (NITROGEN-N-AND PHOSPHORUS-P-), DENSITY OF FAECAL COLIFORMS (I.E., AS A PROXY OF SANITARY CONDITIONS), AND ECOLOGICAL RESPONSES OF THE ZOOPLANKTON COMMUNITY STRUCTURE IN A TROPICAL URBAN COASTAL LAGOON, FOLLOWING EUTROPHICATION, CHANGES IN RAINFALL, AND EPISODIC SANDBAR OPENINGS. SURFACE WATERS WERE MONTHLY TAKE…		UNIVERSIDADE FEDERAL DO RIO DE JANEIRO, INSTITUTO DE BIOLOGIA, DEPARTAMENTO DE ECOLOGIA, LABORATÓRIO DE LIMNOLOGIA, ILHA DO FUNDÃO, CENTRO DE CIÊNCIAS DA SAÚDE, BLOCO A, AV. CARLOS CHAGAS FILHO, 373, RJ, RIO DE JANEIRO, CEP 21941-902, BRAZIL; MUSEU DA CIÊNCIA, UNIVERSIDADE DE COIMBRA, LARGO MARQUÊS DE POMBAL, COIMBRA, PORTUGAL; UNIVERSIDADE DE COIMBRA, CENTRE FOR FUNCTIONAL ECOLOGY, SCIENCE FOR P…	DISTURB; ECOLOGICAL INDICATORS; EUTROPHICATION; FAECAL COLIFORMS; TROPICAL COASTAL LAGOON	10.4257/oeco.2022.2602.12	ARTICLE	COORDENAÇÃO DE APERFEIÇOAMENTO DE PESSOAL DE NÍVEL SUPERIORCOORDENAÇÃO DE APERFEIÇOAMENTO DE PESSOAL DE NÍVEL SUPERIOR, CAPES CONSELHO NACIONAL DE DESENVOLVIMENTO CIENTÍFICO E TECNOLÓGICOCONSELHO NACIONAL DE DESENVOLVIMENTO CIENTÍFICO E TECNOLÓGICO, CNPQ PETROBRASPETROBRAS FUNDAÇÃO CARLOS CHAGAS FILHO DE AMPARO À PESQUISA DO ESTADO DO RIO DE JANEIROFUNDAÇÃO CARLOS CHAGAS FILHO DE AMPARO À PESQUIS…	WE WOULD LIKE TO THANK CAPES/MEC, CNPQ, FAPERJ AND PETROBRAS (ECOLAGOAS PROJECT) FOR FUNDING THIS RESEARCH. WE ARE ESPECIALLY GRATEFUL TO FRANCISCO DE ASSIS ESTEVES (CHICO) FOR HIS VALUABLE CONTRIBUTION TO SCIENCE AND SOCIETY. NA NA		OECOL. AUS.	ENGLISH		2	UNIVERSIDADE FEDERAL DO RIO DE JANEIRO	2022	MARINHO, C.C.; UNIVERSIDADE FEDERAL DO RIO DE JANEIRO, BLOCO A, AV. CARLOS CHAGAS FILHO, 373, RJ, BRAZIL; EMAIL: CLAUDIOCARDOSOMARINHO@GMAIL.COM	18095267	OECOLOGIA AUSTRALIS	0	LONGTERM CHANGES IN SANITARY CONDITIONS AND ZOOPLANKTON COMMUNITY IN THE IMBOASSICA LAGOON RIO DE JANEIRO BRAZIL EFFECTS OF SANDBAR OPENINGS	26	Macaé, Brazil	-22.3708	-41.7869	-	-
A.L. M T;ADOLPHE L;E.G. B L	FACED WITH CURRENT ENERGY CONSTRAINTS OF FAST-GROWING CITIES IN DEVELOPING COUNTRIES, URBAN MORPHOLOGY HAS BEEN POINTED OUT AS A PIVOTAL ISSUE ON SHIFTING TO CLIMATE ADAPTED URBAN ENVIRONMENTS. IN THIS CONTEXT, THIS PAPER ADDRESSES THE TWOFOLD SUSTAINABLE ENERGY CHALLENGE OF TROPICAL CITIES: THE MAJOR POTENTIAL IN HARNESSING SOLAR ENERGY AS RENEWABLE RESOURCE FOR LOCAL ELECTRICITY PRODUCTION AND …		UNIVERSIDADE FEDERAL DO RIO DE JANEIRO, PRÉDIO DA REITORIA, AV. PEDRO CALMON, 550/SL. 433, ILHA DO FUNDÃO, RIO DE JANEIRO, RJ 21941-590, BRAZIL; INSTITUT NATIONAL DES SCIENCES APPLIQUÉES DE TOULOUSE, 135, AVENUE DE RANGUEIL, 31077 TOULOUSE CEDEX 4, FRANCE	CONSTRAINED OPTIMIZATION; DOE ANALYSIS; GENETIC ALGORITHMS; SOLAR POTENTIAL; TROPICAL CLIMATE; URBAN MORPHOLOGY	10.1016/j.enbuild.2014.02.056	ARTICLE	COORDENAÇÃO DE APERFEIÇOAMENTO DE PESSOAL DE NÍVEL SUPERIORCOORDENAÇÃO DE APERFEIÇOAMENTO DE PESSOAL DE NÍVEL SUPERIOR, CAPES CONSELHO NACIONAL DE DESENVOLVIMENTO CIENTÍFICO E TECNOLÓGICOCONSELHO NACIONAL DE DESENVOLVIMENTO CIENTÍFICO E TECNOLÓGICO, CNPQ	WE ACKNOWLEDGE THE BRAZILIAN NATIONAL RESEARCH AGENCIES CAPES, CNPQ AND THE INSTITUT NATIONAL DES SCIENCES APPLIQUÉES DE TOULOUSE FOR THE FINANCIAL SUPPORT. THE AUTHORS WOULD ALSO LIKE TO ACKNOWLEDGE THE COMPANIES ESSS AND ESTECO FOR THE SUPPORT AND FOR PROVIDING THE MODEFRONTIER ® LICENSE USED IN THIS RESEARCH. NA NA	BUILDING CODES; CONSTRAINED OPTIMIZATION; DESIGN; DESIGN OF EXPERIMENTS; DEVELOPING COUNTRIES; GENETIC ALGORITHMS; MULTIOBJECTIVE OPTIMIZATION; SOLAR ENERGY; TROPICS; DAYLIGHT AVAILABILITY; DOE ANALYSIS; ELECTRICITY PRODUCTION; METHODOLOGICAL APPROACH; MORPHOLOGICAL PARAMETERS; SOLAR POTENTIAL; TROPICAL CLIMATES; URBAN MORPHOLOGY; URBAN PLANNING	ENERGY BUILD.	ENGLISH			ELSEVIER BV	2014	A.L. MARTINS, T.; UNIVERSIDADE FEDERAL DO RIO DE JANEIRO, PRÉDIO DA REITORIA, AV. PEDRO CALMON, 550/SL. 433, ILHA DO FUNDÃO, RIO DE JANEIRO, RJ 21941-590, BRAZIL; EMAIL: TATHIANEMARTINS@UFRJ.BR	03787788	ENERGY AND BUILDINGS	66	FROM SOLAR CONSTRAINTS TO URBAN DESIGN OPPORTUNITIES OPTIMIZATION OF BUILT FORM TYPOLOGIES IN A BRAZILIAN TROPICAL CITY	76	Maceió, Brazil	-9.66625	-35.7351	-	-
REYNOLDS C;ESCOBEDO F;CLERICI N;ZEA-CAMANO J	CITIES THROUGHOUT THE WORLD ARE ADVOCATING HIGHLY PROMOTED TREE PLANTINGS AS A CLIMATE CHANGE MITIGATION MEASURE. ASSESSING THE CARBON OFFSETS ASSOCIATED WITH URBAN TREES RELATIVE TO OTHER CLIMATE CHANGE POLICIES IS VITAL FOR SUSTAINABLE DEVELOPMENT, PLANNING, AND SOLVING ENVIRONMENTAL AND SOCIO-ECONOMIC PROBLEMS, BUT IS DIFFICULT IN DEVELOPING COUNTRIES. WE ESTIMATED AND ASSESSED CARBON DIOXIDE …	785	DUKE UNIV, NICHOLAS SCH ENVIRONM, ENVIRONM HALL,9 CIRCUIT DR, DURHAM, NC 27708 USA.; UNIV ROSARIO, FAC CIENCIAS NAT & MATEMAT, PROGRAMA BIOL, CR 24 63C-69, BOGOTA, COLOMBIA.; UNIV FED PARANA, PROGRAMA POS GRAD ENGN FLORESTAL, AV PREF LOTHARIO MEISSNER 632, BR-80210170 CURITIBA, PARANA, BRAZIL.;	CLIMATE CHANGE MITIGATION; NATURE-BASED SOLUTIONS; URBAN FOREST; CARBON OFFSETS; CLEAN DEVELOPMENT MECHANISM; STREET TREES; ECOSYSTEM SERVICES	10.3390/su9050785	ARTICLE			CLIMATE-CHANGE MITIGATION; SUBTROPICAL URBAN FOREST; STORAGE; SEQUESTRATION; GROWTH; REFORESTATION; DYNAMICS; BIOMASS; STOCKS; AREAS	SUSTAINABILITY	ENGLISH			MDPI	2017	CLERICI, N (AUTOR CORRESPONDENTE), UNIV ROSARIO, FAC CIENCIAS NAT & MATEMAT, PROGRAMA BIOL, CR 24 63C-69, BOGOTA, COLOMBIA.		SUSTAINABILITY	18	DOES GREENING OF NEOTROPICAL CITIES CONSIDERABLY MITIGATE CARBON DIOXIDE EMISSIONS THE CASE OF MEDELLIN COLOMBIA	9	Medellin, Colombia	6.2442	-75.5812	-	-
CARRILLO-NIQUETE G;ANDRADE J;VALDEZ-LAZALDE J;REYES-GARCIA C;HERNANDEZ-STEFANONI J	WITH 1.76 MILLION INHABITANTS, ME ' RIDA CITY HAS RECENTLY BECOME THE MOST POPULATED CITY IN SOUTHEAST MEXICO, BEING ONE OF THE MOST ATTRACTIVE CITIES FOR INVESTMENT IN REAL-ESTATE PROJECTS. THIS HAS INCREASED DEFORESTATION TO THE PERIPHERY, RESULTING IN HEAT ISLANDS. WE USED TIME SERIES OF LANDSAT IMAGES AND THE BFAST ALGORITHM TO ANALYZE ANNUAL DEFORESTATION AROUND ME ' RIDA CITY OVER THE 2000-…	104280	CTR INVEST CIENT YUCATAN, MERIDA 97205, YUCATAN, MEXICO.; COLEGIO POSGRAD, CARRETERA MEXICO TEXCOCO KM 36-5, TEXCOCO 52630, ESTADO DE MEXIC, MEXICO.;	LAND COVER CHANGE; LAND SURFACE TEMPERATURE; LANDSAT TIME SERIES; REMOTE SENSING	10.1016/j.lurbplan.2021.104280	ARTICLE			COVER CHANGE; FOREST DISTURBANCE; DETECTING TRENDS; DRY FOREST; VEGETATION; MEXICO; ACCURACY; PATTERNS; YUCATAN; SUMMER	LANDSC. URBAN PLAN.	ENGLISH			ELSEVIER	2022	HERNANDEZ-STEFANONI, JL (AUTOR CORRESPONDENTE), CTR INVEST CIENT YUCATAN, MERIDA 97205, YUCATAN, MEXICO.	0169-2046	LANDSCAPE AND URBAN PLANNING	5	CHARACTERIZING SPATIAL AND TEMPORAL DEFORESTATION AND ITS EFFECTS ON SURFACE URBAN HEAT ISLANDS IN A TROPICAL CITY USING LANDSAT TIME SERIES	217	Merida, Mexico	20.9678	-89.6243	-	-
KOTHARKAR R;BAGADE A;SINGH P	LOCAL CLIMATE ZONE (LCZ) LAND COVER CLASSIFICATION SYSTEM HAS BEEN EFFECTIVE IN INVESTIGATING THE URBAN HEAT ISLAND (UHI) PHENOMENON. IN MID-LATITUDE TROPICAL CITIES, TEMPORAL VARIATION AND COMPOSITE TYPE CLIMATE PROVE IT DIFFICULT TO EVALUATE CRITICAL LCZS. IT IS IMPORTANT TO ADDRESS WHICH LCZ IS MOST CRITICAL IN TERMS OF UHI AND AIR TEMPERATURE EXPOSURE AND HOW TO APPROACH MITIGATION STRATEGIES…	100701	VISVESVARAYA NATL INST TECHNOL NAGPUR, DEPT ARCHITECTURE & PLANNING, NAGPUR 440010, MAHARASHTRA, INDIA.;	URBAN HEAT ISLANDS; MITIGATION; GREEN AREA RATIO; COOL ROOF; ENVI MET; LOCAL CLIMATE ZONES	10.1016/j.uclim.2020.100701	ARTICLE	DEPARTMENT OF SCIENCE AND TECHNOLOGY; SCIENCE AND ENGINEERING RESEARCH BOARD (DST-SERB) [SB/S4/AS-110/2013]	THE STUDY IS SUPPORTED BY THE DEPARTMENT OF SCIENCE AND TECHNOLOGY, AND IS FUNDED BY SCIENCE AND ENGINEERING RESEARCH BOARD (DST-SERB PROJECT SB/S4/AS-110/2013).	OUTDOOR THERMAL COMFORT; ENERGY-CONSUMPTION; FIELD-MEASUREMENTS; GREEN SPACES; AIR-QUALITY; COOL ROOFS; IMPACT; VEGETATION; GEOMETRY; CITIES	URBAN CLIM.	ENGLISH			ELSEVIER	2020	KOTHARKAR, R (AUTOR CORRESPONDENTE), VISVESVARAYA NATL INST TECHNOL, DEPT ARCHITECTURE & PLANNING, VNIT CAMPUS,SOUTH AMBAZARI RD, NAGPUR 440010, MAHARASHTRA, INDIA.	2212-0955	URBAN CLIMATE	8	A SYSTEMATIC APPROACH FOR URBAN HEAT ISLAND MITIGATION STRATEGIES IN CRITICAL LOCAL CLIMATE ZONES OF AN INDIAN CITY	34	Nagpur, India	21.1525	79.0806	-	-
BRIDHIKITTI A;PUMKAEW M;PRABAMROONG T;YU G;LIU G	EUTROPHICATION INDUCED WATER QUALITY DETERIORATION IS TYPICALLY FOUND IN URBAN-AGRICULTURAL ENVIRONMENTS, ESPECIALLY IN TROPICAL CITIES. THIS STUDY AIMS TO UNDERSTAND PROCESSES GOVERNING NUTRIENT DYNAMICS IN SURFACE RUNNING WATERS AT THREE CITIES IN NE THAILAND. SAMPLING WAS PERFORMED IN BOTH DRY AND WET SEASONS. THE SAMPLING SITES EXHIBITED DIFFERENT HYDRO-MORPHOLOGICAL CHARACTERISTICS. THE RESU…	156	MAHIDOL UNIV, SCH INTERDISCIPLINARY STUDIES, ENVIRONM ENGN & DISASTER MANAGEMENT PROGRAM, KANCHANABURI CAMPUS,199 MOO 9, SAIYOK DIST 71150, KANCHANABURI, THAILAND.; MAHIDOL UNIV, EARTH SCI RES CLUSTER, KANCHANABURI CAMPUS,199 MOO 9, SAIYOK DIST 71150, KANCHANABURI, THAILAND.; MAHASARAKHAM UNIV, FAC ENVIRONM & RESOURCE STUDIES, KANTHARAWICHAI DIST 44150, MAHASARAKHAM, THAILAND.; CHINESE ACAD SCI, …	NUTRIENT DYNAMICS; URBAN WATER QUALITY; NORTHEASTERN THAILAND; MUN RIVER BASIN; TROPICAL CLIMATE	10.1007/s40899-022-00750-w	ARTICLE	NATIONAL RESEARCH COUNCIL OF THAILAND, NRCT; NATIONAL NATURAL SCIENCE FOUNDATION OF CHINA [41661144030]	THIS RESEARCH WAS FINANCIALLY SUPPORTED BY THE NATIONAL RESEARCH COUNCIL OF THAILAND, NRCT FISCAL YEAR 2018 TO 2020, AND CO-FUNDED BY THE NATIONAL NATURAL SCIENCE FOUNDATION OF CHINA UNDER THE THAILAND-CHINA FUTURE EARTH PROJECT (D41661144030).	WATER-QUALITY; MANAGEMENT-PRACTICES; SORPTION CAPACITY; PHOSPHORUS FLOWS; MASS-BALANCE; LAND-USE; NITROGEN; ESTUARY; EUTROPHICATION; SEDIMENTS	SUSTAIN. WAT. RESOUR. MANAG.	ENGLISH			SPRINGER INT PUBL AG	2022	BRIDHIKITTI, A (AUTOR CORRESPONDENTE), MAHIDOL UNIV, SCH INTERDISCIPLINARY STUDIES, ENVIRONM ENGN & DISASTER MANAGEMENT PROGRAM, KANCHANABURI CAMPUS,199 MOO 9, SAIYOK DIST 71150, KANCHANABURI, THAILAND.; BRIDHIKITTI, A (AUTOR CORRESPONDENTE), MAHIDOL UNIV, EARTH SCI RES CLUSTER, KANCHANABURI CAMPUS,199 MOO 9, SAIYOK DIST 71150, KANCHANABURI, THAILAND.	2363-5037	SUSTAINABLE WATER RESOURCES MANAGEMENT	0	PROCESSES GOVERNING NUTRIENT DYNAMICS IN TROPICAL URBANAGRICULTURE RIVERS NE THAILAND	8	Nakhon Ratchasima and Ubon Ratchathani, Thailand	14.9724	102.099	15.2297	104.856
EVANS D;VIS B;DUNNING N;GRAHAM E;ISENDAHL C	SOILS ARE A PIVOT OF SUSTAINABLE DEVELOPMENT. YET, URBAN PLANNING DECISIONS PERSIST IN COMPROMISING THE USABILITY OF THE URBAN SOILS RESOURCE. URBAN LAND COVER EXPANSION TO ACCOMMODATE AN INCREASING POPULATION RESULTS IN SOIL SEALING. CONCEALMENT OF AND PHYSICAL OBSTRUCTIONS TO SOILS PREVENT URBAN POPULATIONS FROM ENGAGING WITH THEIR SOIL DEPENDENCY. THE CONCEPT OF SOIL CONNECTIVITY RECOGNISES TH…	114925	UNIV LANCASTER, LANCASTER ENVIRONM CTR, LANCASTER, LANCS, ENGLAND.; UNIV WEST BOHEMIA, CTR AFRICAN STUDIES, DEPT MIDDLE EASTERN STUDIES, PLZEN, CZECH REPUBLIC.; UNIV CINCINNATI, DEPT GEOG & GIS, CINCINNATI, OH USA.; UCL, INST ARCHAEOL, LONDON, ENGLAND.; UNIV GOTHENBURG, DEPT HIST STUDIES, GOTHENBURG, SWEDEN.;	SOIL CONNECTIVITY; URBAN SOIL SECURITY; SOIL SEALING; MAYA URBANISM; APPLIED ARCHAEOLOGY; URBAN SUSTAINABILITY	10.1016/j.geoderma.2020.114925	ARTICLE	ARTS & HUMANITIES RESEARCH COUNCIL (AHRC; UK) [AH/N006240/1]; BBSRC; NERC [NE/M009106/1]; NATIONAL SCIENCE FOUNDATION (U.S.) [BCS-1632392]; LEVERHULME TRUST [RPG-2013-204]; SOCIAL SCIENCES AND HUMANITIES RESEARCH COUNCIL OF CANADA (SSHRC); YORK UNIVERSITY (TORONTO); ROYAL ONTARIO MUSEUM	THE PAPER WAS INITIATED AS PART OF THE PROJECT PRE-COLUMBIAN TROPICAL URBAN LIFE: PLACING THE PAST IN DESIGNS FOR SUSTAINABLE URBAN FUTURES (TRULIFE), FUNDED BY AN ARTS & HUMANITIES RESEARCH COUNCIL (AHRC; UK) GRANT TO BENJAMIN VIS AND CHRISTIAN ISENDAHL (AH/N006240/1), THE STEERING COMMITTEE OF WHICH INCLUDED ELIZABETH GRAHAM AND KARSTEN LAMBERS. DANIEL EVANS WAS SUPPORTED BY BBSRC AND NERC THRO…	ANCIENT MAYA; SETTLEMENT-PATTERNS; AMBERGRIS CAYE; MARCO GONZALEZ; FOOD SECURITY; EL PETEN; IMPACTS; CITY; AGRICULTURE; MANAGEMENT	GEODERMA	ENGLISH			ELSEVIER	2021	EVANS, DL (AUTOR CORRESPONDENTE), UNIV LANCASTER, LANCASTER ENVIRONM CTR, LANCASTER, LANCS, ENGLAND.	0016-7061	GEODERMA	3	BURIED SOLUTIONS HOW MAYA URBAN LIFE SUBSTANTIATES SOIL CONNECTIVITY	387	Precolumbian lowland Maya	-	-	-	-
AMORIM M	TROPICAL CITIES LOCATED IN INLAND BRAZIL TYPICALLY HAVE HIGH TEMPERATURES THAT ARE EXTREMELY UNCOMFORTABLE AND DETRIMENTAL TO THEIR POPULATION'S HEALTH. THIS ARTICLE ANALYZES THE SPATIAL VARIABILITY OF TARGET TEMPERATURES, AIMING TO AMELIORATE TERRITORIAL URBAN PLANNING. IT DOES SO BY: STUDYING THE RELATIONSHIP BETWEEN SURFACE CHARACTERISTICS (LAND USE AND OCCUPATION) IN A CONTINENTAL TROPICAL CL…		SÃO PAULO STATE UNIVERSITY (UNESP), FACULTY OF SCIENCE AND TECHNOLOGY, PRESIDENTE PRUDENTE, SÃO PAULO, BRAZIL	LAND USE; LANDSAT 8; SPATIAL VARIABILITY; SURFACE HEAT ISLAND; VEGETATION	10.1016/j.rsase.2017.11.001	ARTICLE	2015/50439-4 FUNDAÇÃO DE AMPARO À PESQUISA DO ESTADO DE SÃO PAULOFUNDAÇÃO DE AMPARO À PESQUISA DO ESTADO DE SÃO PAULO, FAPESP, 2014/16350-3 CONSELHO NACIONAL DE DESENVOLVIMENTO CIENTÍFICO E TECNOLÓGICOCONSELHO NACIONAL DE DESENVOLVIMENTO CIENTÍFICO E TECNOLÓGICO, CNPQ, 307287/2014-9	THE AUTHOR IS GRATEFUL TO THE FOUNDATION FOR RESEARCH SUPPORT OF THE STATE OF SÃO PAULO ( FAPESP, BRAZIL ) - FOR FUNDING THE RESEARCH GRANT PROJECT (2014/16350-3) AND THE FAPESP/CNRS COOPERATION AGREEMENT ( 2015/50439-4 ). TO CNPQ, BRAZIL - PRODUCTIVITY RESEARCH GRANT - PROCESS: 307287/2014-9. NA NA		REMOTE SENS. APPL. SOC. ENVIRON.	ENGLISH			ELSEVIER B.V.	2018		23529385	REMOTE SENSING APPLICATIONS: SOCIETY AND ENVIRONMENT	11	SPATIAL VARIABILITY AND INTENSITY FREQUENCY OF SURFACE HEAT ISLAND IN A BRAZILIAN CITY WITH CONTINENTAL TROPICAL CLIMATE THROUGH REMOTE SENSING	9	Presidente Prudente, Brazil	-22.1226	-51.3881	-	-
BISWAS R;SHARMA R;GYASI-AGYEI Y	ADVANCING KNOWLEDGE ON HOW CLIMATE CHANGE IMPACTS ON WATER RESOURCES IS CONSIDERED A PRIORITY IN THE ACADEMIC WORLD. THIS PAPER STUDIES THE STRATEGIES ADOPTED BY URBAN WATER PROFESSIONALS IN THE TROPICAL REGION OF QUEENSLAND, AUSTRALIA TO MINIMISE THE IMPACTS OF CLIMATE CHANGE ON THE REGIONAL URBAN WATER SUPPLY NETWORK. IN THE RECENT PAST, THE DRY TROPICAL URBAN REGION OF QUEENSLAND HAS FACED A C…	131643	CENT QUEENSLAND UNIV, SCH ENGN & TECHNOL, TOWNSVILLE, QLD, AUSTRALIA.; CENT QUEENSLAND UNIV, SCH ENGN & TECHNOL, MELBOURNE, VIC, AUSTRALIA.; GRIFFITH UNIV, SCH ENGN & BUILT ENVIRONM, NATHAN, QLD, AUSTRALIA.;	CLIMATE CHANGE; ADAPTATION; WATER AUTHORITY; URBAN WATER; WATER SECURITY	10.1016/j.jclepro.2022.131643	ARTICLE	DEPARTMENT OF EDUCATION, SKILLS AND EMPLOYMENT, AUSTRALIA	THIS RESEARCH WORK WAS SUPPORTED BY THE RESEARCH TRAINING PROGRAM (RTP) TUITION FEE SCHOLARSHIP FUNDING PROVIDED BY THE DEPARTMENT OF EDUCATION, SKILLS AND EMPLOYMENT, AUSTRALIA. WE ARE GRATEFUL TO THE WATER PROFESSIONALS WHO PARTICIPATED IN THE INTERVIEWS THAT YIELDED VALUABLE INFORMATION. VALUABLE AND CONSTRUCTIVE COMMENTS BY THE THREE ANONYMOUS REVIEWERS ARE GREATLY ACKNOWLEDGED.	SEA-LEVEL RISE; RESOURCES MANAGEMENT; LOCAL-GOVERNMENT; CHANGE IMPACTS; RIVER-BASIN; BARRIERS; TEMPERATURE; STRATEGIES; AUSTRALIA; FRAMEWORK	J. CLEAN PROD.	ENGLISH			ELSEVIER SCI LTD	2022	BISWAS, RR (AUTOR CORRESPONDENTE), CENT QUEENSLAND UNIV, SCH ENGN & TECHNOL, TOWNSVILLE, QLD, AUSTRALIA.	0959-6526	JOURNAL OF CLEANER PRODUCTION	0	ADAPTATION TO CLIMATE CHANGE A STUDY ON REGIONAL URBAN WATER MANAGEMENT AND PLANNING PRACTICE	355	Queensland, Australia	-20.9176	142.703	-	-
ALBUQUERQUE-LIMA S;DINIZ U;MACHADO I	POLLINATOR-FRIENDLY PLANTS ARE OFTEN A NECESSARY COMPONENT OF THE MANAGEMENT OF URBAN ECOSYSTEM THAT AIM TO REDUCE THE IMPACT OF THE ARTIFICIAL URBAN MATRIX ON NATURAL POLLINATOR POPULATIONS. NECTARIVOROUS BATS ARE NEGLECTED COMPONENTS OF THE URBAN POLLINATOR COMMUNITY AND THERE IS A PAUCITY OF ASSESSMENTS ON POLLINATORFRIENDLY PLANTS THAT MAY PROVIDE URBAN BATS WITH RELIABLE, YEAR-LONG RESOURCES…	127412	UNIV FED PERNAMBUCO, CTR BIOSCI, BOT DEPT, LAB FLORAL & REPROD BIOL, 1235 PROF MORAES REGO AVE,CIDADE UNIV, BR-50670901 RECIFE, PE, BRAZIL.; UNIV BRASILIA, INST BIOL SCI, ZOOL DEPT, LAB BAT BIOL & CONSERVAT, BR-70910900 BRASILIA, DF, BRAZIL.;	CALABASH-TREE; CHIROPTEROPHILY; GLOSSOPHAGA SORICINA; NECTAR DYNAMICS; POLLINATOR-FRIENDLY PLANTS; URBAN PLANT-POLLINATOR INTERACTION	10.1016/j.ufug.2021.127412	ARTICLE	CONSELHO NACIONAL DE DESENVOLVIMENTO CIENTIFICO E TECNOLOGICO (CNPQ) [311021/2014-0, 310508/2019-3, 459485/2014, 437424/2018-9]; COORDENACAO DE APERFEICOAMENTO DE PESSOAL DE NIVEL SUPERIOR (CAPES) [001]	THIS WORK WAS SUPPORTED BY CONSELHO NACIONAL DE DESENVOLVIMENTO CIENTIFICO E TECNOLOGICO (CNPQ) WITH FINANCIAL SUPPORTS FOR RESEARCH TO ICM (RESEARCH GRANTS 311021/2014-0, 310508/2019-3 AND UNIVERSAL 459485/2014, 437424/2018-9) AND AN UNDERGRADUATE SCHOLARSHIP TO SAL AND UMD (PIBIC/UFPE/CNPQ); AND BY COORDENACAO DE APERFEICOAMENTO DE PESSOAL DE NIVEL SUPERIOR (CAPES): FINANCING CODE 001.	REPRODUCTIVE-BIOLOGY; GREEN INFRASTRUCTURE; POLLINATION BIOLOGY; COLUMNAR CACTI; SORICINA; AREAS; PATTERNS; PHENOLOGY; CAATINGA; PLANTS	URBAN FOR. URBAN GREEN.	ENGLISH			ELSEVIER GMBH	2022	MACHADO, ICS (AUTOR CORRESPONDENTE), UNIV FED PERNAMBUCO, DEPT BOT, LAB BIOL FLORAL & REPROD, BR-50670901 RECIFE, PE, BRAZIL.	1618-8667	URBAN FORESTRY & URBAN GREENING	2	A NECTAR OASIS FOR URBAN GLOSSOPHAGINAE BATS TEMPORAL RESOURCE DYNAMICS OF THE CHIROPTEROPHILOUS CRESCENTIA CUJETE BIGNONIACEAE	67	Recife, Brazil	-8.05224	-34.9286	-	-
VILLALOBOS-FORBES M;ESQUIVEL-HERNANDEZ G;SANCHEZ-MURILLO R;SANCHEZ-GUTIERREZ R;MATIATOS I	INCREASING ENERGY CONSUMPTION AND FOOD PRODUCTION WORLDWIDE RESULTS IN ANTHROPOGENIC EMISSIONS OF REACTIVE NITROGEN INTO THE ATMOSPHERE. TO DATE, HOWEVER, LITTLE INFORMATION IS AVAILABLE ON TROPICAL URBAN ENVIRONMENTS WHERE INORGANIC NITROGEN IS VASTLY TRANSPORTED AND DEPOSITED THROUGH PRECIPITATION ON TERRESTRIAL AND AQUATIC ECOSYSTEMS. TO FILL THIS GAP, WE PRESENT COMPOSITIONS OF WATER STABLE I…		UNIV NACL COSTA RICA, STABLE ISOTOPES RES GRP, CHEM DEPT, HEREDIA 863000, COSTA RICA.; UNIV NACL COSTA RICA, CHEM DEPT, WATER RESOURCES MANAGEMENT LAB, HEREDIA 863000, COSTA RICA.; IAEA, ISOTOPE HYDROL SECT, VIENNA INT CTR, A-1400 VIENNA, AUSTRIA.;	STABLE ISOTOPES; NITRATE; WET DEPOSITION; RAINFALL GENERATION PROCESSES; URBAN TROPICAL ATMOSPHERE; COSTA RICA	10.1007/s11356-021-15327-x	ARTICLE	IAEA [22762, F32008]	THE RESEARCH WAS FUNDED BY THE IAEA'S COORDINATED RESEARCH PROJECT F32008 ENTITLED "GLOBAL MONITORING OF NITROGEN ISOTOPES IN ATMOSPHERIC WATERS," IAEA RESEARCH CONTRACT NO.: 22762.	PRECIPITATION CHEMISTRY; NITROGEN DEPOSITION; DIOXIDE EMISSIONS; SOIL; NOX; SULFUR; MODEL; RAIN; VARIABILITY; PROJECTIONS	ENVIRON. SCI. POLLUT. RES.	ENGLISH	34258705		SPRINGER HEIDELBERG	2021	ESQUIVEL-HERNANDEZ, G (AUTOR CORRESPONDENTE), UNIV NACL COSTA RICA, STABLE ISOTOPES RES GRP, CHEM DEPT, HEREDIA 863000, COSTA RICA.; ESQUIVEL-HERNANDEZ, G (AUTOR CORRESPONDENTE), UNIV NACL COSTA RICA, CHEM DEPT, WATER RESOURCES MANAGEMENT LAB, HEREDIA 863000, COSTA RICA.	0944-1344	ENVIRONMENTAL SCIENCE AND POLLUTION RESEARCH	2	STABLE ISOTOPIC CHARACTERIZATION OF NITRATE WET DEPOSITION IN THE TROPICAL URBAN ATMOSPHERE OF COSTA RICA	28	San José, Costa Rica	9.92807	-84.0907	-	-
OLIVERO-LORA S;ROJAS-SANDOVAL J;MELENDEZ-ACKERMAN E;ORENGO-ROLON J	URBAN FORESTS ARE VALUABLE SPACES FOR SPECIES CONSERVATION, PROTECTION OF LOCAL BIODIVERSITY AND PROVISION OF ECOSYSTEM SERVICES. HOWEVER, THEY ARE ALSO VULNERABLE TO THE IMPACT OF EXTREME CLIMATE EVENTS LIKE HURRICANES. UNDERSTANDING HOW URBAN FORESTS ARE RESPONDING TO HURRICANE DISTURBANCES IS CRUCIAL TO IMPROVE THEIR DESIGN, MANAGEMENT, AND RESILIENCE. HERE WE ANALYZED PRE-AND POST-HURRICANE V…		UNIV PUERTO RICO, DEPT ENVIRONM SCI, RIO PIEDRAS CAMPUS, SAN JUAN, PR 00931 USA.; UNIV CONNECTICUT, INST ENVIRONM, STORRS, CT 06269 USA.; UNIV PUERTO RICO, CTR APPL TROP ECOL & CONSERVAT CATEC, RIO PIEDRAS CAMPUS, SAN JUAN, PR 00931 USA.;	CARIBBEAN; I-TREE; NON-NATIVE TREES; TREE MORTALITY; URBAN FORESTRY; WIND DAMAGE	10.1007/s11252-022-01236-5	ARTICLE	CENTER FOR APPLIED TROPICAL ECOLOGY AND CONSERVATION (CATEC); INSTITUTE FOR TROPICAL ECOSYSTEM STUDIES (ITES); OFFICE OF THE DEAN OF GRADUATE STUDIES AND RESEARCH (UPR-DEGI)	WE WOULD LIKE TO THANK OUR BACKERS FOR THEIR SUPPORT. THIS STUDY WAS ALSO SUPPORTED BY THE CENTER FOR APPLIED TROPICAL ECOLOGY AND CONSERVATION (CATEC) AND THE INSTITUTE FOR TROPICAL ECOSYSTEM STUDIES (ITES). S.O-L WAS SUPPORTED BY THE OFFICE OF THE DEAN OF GRADUATE STUDIES AND RESEARCH (UPR-DEGI). WE ALSO THANK J. ORENGO, W. RIVERA, L. DIAZ-PEREZ, J. GARCIA, A. LOPEZ AND C. AVILES AND MANY VOLUN…	GREEN INFRASTRUCTURE; FOREST; DAMAGE; SUSCEPTIBILITY; VULNERABILITY; INTENSITY; BENEFITS; MARIA; TREES	URBAN ECOSYST.	ENGLISH			SPRINGER	2022	MELENDEZ-ACKERMAN, EJ (AUTOR CORRESPONDENTE), UNIV PUERTO RICO, DEPT ENVIRONM SCI, RIO PIEDRAS CAMPUS, SAN JUAN, PR 00931 USA.; MELENDEZ-ACKERMAN, EJ (AUTOR CORRESPONDENTE), UNIV PUERTO RICO, CTR APPL TROP ECOL & CONSERVAT CATEC, RIO PIEDRAS CAMPUS, SAN JUAN, PR 00931 USA.	1083-8155	URBAN ECOSYSTEMS	0	HURRICANE DRIVEN CHANGES IN VEGETATION STRUCTURE AND ECOSYSTEM SERVICES IN TROPICAL URBAN YARDS A STUDY CASE IN SAN JUAN PUERTO RICO	25	San Juan, Puerto Rico	18.4655	-66.1057	-	-
MUÑOZ-ERICKSON T;LUGO A;QUINTERO B	THE SYNTHESIS OF THE CONTRIBUTIONS IN THIS SPECIAL ISSUE ABOUT THE TROPICAL CITY OF SAN JUAN HAS RESULTED IN FIVE THEMES. FIRST, THE CITY IS SUBJECT TO MULTIPLE VULNERABILITIES, BUT SOCIOECONOMIC FACTORS AND EDUCATION LEVEL AFFECT THE PERCEPTION OF CITIZENS TO THOSE VULNERABILITIES, EVEN IN THE FACE OF IMMINENT THREAT. SECOND, IN LIGHT OF THE SOCIAL-ECOLOGICAL CONDITIONS OF THE CITY, HOW ITS CITI…	23	USDA FOREST SERVICE INTERNATIONAL INSTITUTE OF TROPICAL FORESTRY, PUERTO RICO; STATE UNIVERSITY OF NEW YORK, COLLEGE OF ENVIRONMENTAL SCIENCE AND FORESTRY, UNITED STATES	ADAPTIVE CAPACITY; GREEN AND BLUE INFRASTRUCTURE; INFORMATION FLOWS; NOVEL ECOSYSTEMS; SOCIAL-ECOLOGICAL SYSTEMS; TROPICAL CITIES; VULNERABILITY	10.5751/ES-06385-190323	ARTICLE	DIRECTORATE FOR SOCIAL, BEHAVIORAL AND ECONOMIC SCIENCESDIRECTORATE FOR SOCIAL, BEHAVIORAL AND ECONOMIC SCIENCES, SBE, 0948507	NA NA NA	ADAPTIVE MANAGEMENT; BIOTA; ECOSYSTEM RESILIENCE; ENVIRONMENTAL CHANGE; HOUSEHOLD INCOME; INFORMATION; NEIGHBORHOOD; SOCIOECONOMIC STATUS; TROPICAL REGION; VULNERABILITY; PUERTO RICO; SAN JUAN [PUERTO RICO]	ECOL. SOC.	ENGLISH		3	RESILIENCE ALLIANCE	2014	MUÑOZ-ERICKSON, T.A.; USDA FOREST SERVICE INTERNATIONAL INSTITUTE OF TROPICAL FORESTRY, 1201 CALLE CEIBA, PUERTO RICO	17083087	ECOLOGY AND SOCIETY	21	EMERGING SYNTHESIS THEMES FROM THE STUDY OF SOCIALECOLOGICAL SYSTEMS OF A TROPICAL CITY	19	San Juan, Puerto Rico	18.4655	-66.1057	-	-
NYTCH C;MELENDEZ-ACKERMAN E;PEREZ M;ORTIZ-ZAYAS J	RAINFALL INTERCEPTION IS AN IMPORTANT PART OF THE URBAN HYDROLOGICAL CYCLE. UNDERSTANDING IS LIMITED ABOUT THE ROLE OF URBAN TREES AND OTHER VEGETATION IN THE INTERCEPTION PROCESS. THIS STUDY QUANTIFIED INTERCEPTION LOSSES BY SIX TREES IN THE CARIBBEAN COASTAL CITY OF SAN JUAN, PUERTO RICO, THREE REPRESENTING A BROADLEAF EVERGREEN, AND THREE REPRESENTING A BROADLEAF DECIDUOUS SPECIES. RAINFALL WA…		UNIV PUERTO RICO RIO PIEDRAS, DEPT ENVIRONM SCI, POB 70377, SAN JUAN, PR 00936 USA.; UNIV PUERTO RICO RIO PIEDRAS, DEPT MATH, POB 70377, SAN JUAN, PR 00936 USA.;	INTERCEPTION; RAINFALL INTENSITY; URBAN TREES; SUBTROPICAL; PUERTO RICO	10.1007/s11252-018-0768-4	ARTICLE	NATIONAL SCIENCE FOUNDATION [0801577]; GARDEN CLUB OF AMERICA ZONE VI 2014 URBAN FORESTRY FELLOWSHIP; GARDEN CLUB OF AMERICA ZONE VI 2015 URBAN FORESTRY FELLOWSHIP	THIS MATERIAL IS BASED ON WORK SUPPORTED BY THE NATIONAL SCIENCE FOUNDATION UNDER GRANT NUMBER 0801577, AND THE GARDEN CLUB OF AMERICA ZONE VI 2014 AND 2015 URBAN FORESTRY FELLOWSHIPS.	GROSS RAINFALL; WATER-BALANCE; GREEN SPACE; FOREST; STEMFLOW; THROUGHFALL; MANAGEMENT; IMPACTS; CANOPY; STREET	URBAN ECOSYST.	ENGLISH			SPRINGER	2019	NYTCH, CJ (AUTOR CORRESPONDENTE), UNIV PUERTO RICO RIO PIEDRAS, DEPT ENVIRONM SCI, POB 70377, SAN JUAN, PR 00936 USA.	1083-8155	URBAN ECOSYSTEMS	19	RAINFALL INTERCEPTION BY SIX URBAN TREES IN SAN JUAN PUERTO RICO	22	San Juan, Puerto Rico	18.4655	-66.1057	-	-
MARTINUZZI S;LOCKE D;RAMOS-GONZALEZ O;SANCHEZ M;GROVE J;MUNOZ-ERICKSON T;ARENDT W;BAUER G	UNDERSTANDING THE DISTRIBUTION OF URBAN TREE CANOPY COVER AND ITS RELATIONSHIP WITH SOCIOECONOMIC CHARACTERISTICS IS CRITICAL FOR INFORMING URBAN PLANNING AND ECOLOGICAL RESEARCH. HOWEVER, MOST KNOWLEDGE ON THIS TOPIC COMES FROM STUDIES IN HIGH-INCOME COUNTRIES (E.G., NORTH AMERICA), AND THUS, LITTLE IS KNOWN FOR OTHER CULTURAL, ECOLOGICAL, AND POLITICAL CONTEXTS. HERE, WE DERIVED A HIGH-SPATIAL …	127125	UNIV WISCONSIN, DEPT FOREST & WILDLIFE ECOL, SILVIS LAB, 1630 LINDEN DR, MADISON, WI 53706 USA.; NATL SOCIOENVIRONM SYNTH CTR SESYNC, 1 PK PL, ANNAPOLIS, MD 21401 USA.; US FOREST SERV, USDA, INT INST TROP FORESTRY & INT URBAN FIELD STN, JARDIN BOT 1201 CALLE CEIBA, RIO PIEDRAS, PR 00926 USA.; AYUNTAMIENTO DIST NACL, CTR LOS HEROES, AV JIMENEZ MOYA, SANTO DOMINGO 10101, DOMINICAN REP.; US FOREST S…	CARIBBEAN; LATIN AMERICA; REMOTE SENSING; TREE CANOPY; URBAN ECOLOGY; URBAN FORESTRY; WORLDVIEW-3	10.1016/j.ufug.2021.127125	ARTICLE	USAID/DOMINICAN REPUBLIC [PAPA-AEG-T-00-07-00003]; USFS IITF; UNIVERSITY OF WISCONSIN-MADISON; NATIONAL SOCIO-ENVIRONMENTAL SYNTHESIS CENTER (SESYNC) UNDER NATIONAL SCIENCE FOUNDATION [DBI-1052875]	THIS WORK WAS SUPPORTED BY A PARTICIPATION AGENCY PROGRAM AGREEMENT (PAPA-AEG-T-00-07-00003) FROM USAID/DOMINICAN REPUBLIC, INCLUDING A JOINT VENTURE BETWEEN THE USFS IITF AND THE UNIVERSITY OF WISCONSIN-MADISON, AND BY THE NATIONAL SOCIO-ENVIRONMENTAL SYNTHESIS CENTER (SESYNC) UNDER FUNDING RECEIVED FROM THE NATIONAL SCIENCE FOUNDATION DBI-1052875. THE FINDINGS AND CONCLUSIONS IN THIS PUBLICATIO…	SPATIAL-RESOLUTION IKONOS; LAND-COVER; VEGETATION COVER; GREEN SPACE; WORLDVIEW-2; CLASSIFICATION; EXTRACTION; FORESTS; IMAGERY; STREET	URBAN FOR. URBAN GREEN.	ENGLISH			ELSEVIER GMBH	2021	MARTINUZZI, S (AUTOR CORRESPONDENTE), UNIV WISCONSIN, DEPT FOREST & WILDLIFE ECOL, SILVIS LAB, 1630 LINDEN DR, MADISON, WI 53706 USA.	1618-8667	URBAN FORESTRY & URBAN GREENING	2	EXPLORING THE RELATIONSHIPS BETWEEN TREE CANOPY COVER AND SOCIOECONOMIC CHARACTERISTICS IN TROPICAL URBAN SYSTEMS THE CASE OF SANTO DOMINGO DOMINICAN	62	Santo Domingo, Dominican Republic	18.4861	-69.9312	-	-
MALTA J;NARDOCCI A;RAZZOLINI M;DINIZ V;CUNHA D	WHILE THE PRESENCE OF MICROCYSTIN-LR (MC-LR) IN RAW WATER FROM EUTROPHIC RESERVOIRS POSES HUMAN HEALTH CONCERNS, THE RISKS ASSOCIATED WITH THE INGESTION OF MC-LR IN DRINKING WATER ARE NOT FULLY ELUCIDATED. WE USED A TIME SERIES OF MC-LR IN RAW WATER FROM TROPICAL URBAN RESERVOIRS IN BRAZIL TO ESTIMATE THE HAZARD QUOTIENTS (HQS) FOR NON-CARCINOGENIC HEALTH EFFECTS AND THE POTENTIAL INGESTION OF MC…	253	UNIV SAO PAULO, SAO CARLOS SCH ENGN, DEPT HYDRAUL & SANIT ENGN, AV TRABALHADOR SAO CARLENSE 400, BR-13566590 SAO CARLOS, SP, BRAZIL.; UNIV SAO PAULO, SCH PUBL HLTH, DEPT ENVIRONM HLTH, AV DR ARNALDO 715,1 ANDAR, BR-01246904 SAO PAULO, SP, BRAZIL.; CTR RES ENVIRONM RISK ASSESSMENT NARA, AV DR ARNALDO 715,1 ANDAR, BR-01246904 SAO PAULO, SP, BRAZIL.; UNIV ESTADUAL CAMPINAS, INST CHEM, DEPT ANALYT CH…	CYANOTOXINS; DRINKING SUPPLY RESERVOIRS; ENVIRONMENTAL MONITORING; HAZARD QUOTIENTS; PUBLIC HEALTH; RISK ASSESSMENT	10.1007/s10661-022-09875-z	ARTICLE	CNPQ (CONSELHO NACIONAL DE DESENVOLVIMENTO CIENTIFICO E TECNOLOGICO) [300899/2016-5, 406855/2016-1]	CNPQ (CONSELHO NACIONAL DE DESENVOLVIMENTO CIENTIFICO E TECNOLOGICO) FUNDED THIS RESEARCH (GRANTS #300899/2016-5 AND #406855/2016-1).	DRINKING-WATER; SAO-PAULO; CYANOBACTERIAL BLOOMS; SEMIARID REGION; CYANOTOXINS; REMOVAL; TOXICITY; INTOXICATION; QUALITY; HEALTH	ENVIRON. MONIT. ASSESS.	ENGLISH	35254523		SPRINGER	2022	CUNHA, DGF (AUTOR CORRESPONDENTE), UNIV SAO PAULO, SAO CARLOS SCH ENGN, DEPT HYDRAUL & SANIT ENGN, AV TRABALHADOR SAO CARLENSE 400, BR-13566590 SAO CARLOS, SP, BRAZIL.	0167-6369	ENVIRONMENTAL MONITORING AND ASSESSMENT	1	EXPOSURE TO MICROCYSTINLR IN TROPICAL RESERVOIRS FOR WATER SUPPLY POSES HIGH RISKS FOR CHILDREN AND ADULTS	194	São Paulo State, Brazil	-	-	-	-
LOPEZ-DOVAL J;MONTAGNER C;DE A A;MOSCHINI-CARLOS V;UMBUZEIRO G;POMPEO M	RESERVOIRS LOCATED IN URBAN AREAS SUFFER SPECIFIC PRESSURES RELATED TO HUMAN ACTIVITIES. THEIR MONITORING, MANAGEMENT, AND PROTECTION REQUIREMENTS DIFFER FROM RESERVOIRS SITUATED IN NON-URBANIZED AREAS. THE OBJECTIVES OF THIS STUDY WERE: (A) TO DETERMINE THE CONCENTRATIONS OF SELECT PESTICIDES AND EMERGING POLLUTANTS (EPS) PRESENT IN AN URBAN RESERVOIR; (B) TO DESCRIBE THEIR POSSIBLE SPATIAL DIST…		UNIV SAO PAULO, INST BIOSCI, DEPT ECOL, RUA MATAOTRAVESSA 14 321, BR-05508090 BUTANTA, SP, BRAZIL.; UNIV BARCELONA, DEPT EVOLUTIONARY BIOL ECOL & ENVIRONM SCI, AVINGUDA DIAGONAL 643, E-08028 BARCELONA, SPAIN.; UNIV ESTADUAL CAMPINAS, INST CHEM, POB 6154, BR-13084971 CAMPINAS, SP, BRAZIL.; UNIV ESTADUAL CAMPINAS, SCH TECHNOL, RUA PASCHOAL MARMO 1888, BR-13484332 LIMEIRA, BRAZIL.; SAO PAULO STATE U…	URBAN RESERVOIR; TROPICAL REGION; EMERGING POLLUTANTS; RISK ASSESSMENT; CHEMICAL QUALITY	10.1016/j.scitotenv.2016.09.210	ARTICLE	SAO PAULO STATE RESEARCH FOUNDATION (FAPESP) [2012/16420-6, 2012/11890-4, 2014/22581-0, 2014/24740-6]	THIS RESEARCH WAS FUNDED BY THE SAO PAULO STATE RESEARCH FOUNDATION (FAPESP, PROJECTS 2012/16420-6, 2012/11890-4, 2014/22581-0, AND 2014/24740-6). SPECIAL THANKS TO PHILIPE RISKALLA LEAL, BRUNO DE PAES, GEISON CASTRO, SHEILA CARDOSO-SILVA AND FREDERICO BEGHELLI WHO COLLABORATED IN SAMPLING CAMPAIGNS AND SAMPLE ANALYSIS. THANKS TO THREE ANONYMOUS REVIEWERS WHO IMPROVED THIS ARTICLE WITH THEIR SUGG…	SAO-PAULO STATE; FRESH-WATER; ORGANIC CONTAMINANTS; ILLICIT DRUGS; GUARAPIRANGA RESERVOIR; MEDITERRANEAN RIVER; CHEMICAL-POLLUTANTS; DRINKING-WATER; SURFACE WATERS; GUADIANA BASIN	SCI. TOTAL ENVIRON.	ENGLISH	27745929		ELSEVIER	2017	LOPEZ-DOVAL, JC (AUTOR CORRESPONDENTE), UNIV SAO PAULO, INST BIOSCI, DEPT ECOL, RUA MATAOTRAVESSA 14 321, BR-05508090 BUTANTA, SP, BRAZIL.	0048-9697	SCIENCE OF THE TOTAL ENVIRONMENT	66	NUTRIENTS EMERGING POLLUTANTS AND PESTICIDES IN A TROPICAL URBAN RESERVOIR SPATIAL DISTRIBUTIONS AND RISK ASSESSMENT	575	São Paulo, Brazil	-23.5487	-46.6382	-	-
BARBOSA K;RODEWALD A;RIBEIRO M;JAHN A	A LARGE BODY OF EVIDENCE INDICATES THAT URBANIZATION PROFOUNDLY AFFECTS ECOLOGICAL COMMUNITIES, BUT THE EXTENT TO WHICH PATTERNS ARE GENERALIZABLE ACROSS REGIONS, SUCH AS IN THE NEOTROPICS, REMAINS UNCLEAR. WE EXAMINED RESPONSES OF MIGRATORY AND RESIDENT BIRDS TO HUMAN DISTURBANCE AND HABITAT ATTRIBUTES IN SAO PAULO, BRAZIL, A TROPICAL MEGACITY IN SOUTH AMERICA. IN 2017-2018, WE SURVEYED BIRDS AC…	103769	UNIV ESTADUAL PAULISTA UNESP, INST BIOCIENCIAS, DEPT BIODIVERSIDADE, LEEC, RIO CLARO, SP, BRAZIL.; CORNELL UNIV, CORNELL LAB ORNITHOL, ITHACA, NY USA.; CORNELL UNIV, DEPT NAT RESOURCES, FERNOW HALL, ITHACA, NY 14853 USA.; INDIANA UNIV, ENVIRONM RESILIENCE INST, 717 E 8TH ST, BLOOMINGTON, IN 47408 USA.;	BIODIVERSITY; URBANIZATION; URBAN PARKS; ATLANTIC FOREST; SOUTH AMERICA	10.1016/j.landurbplan.2020.103769	ARTICLE	COORDENACAO DE APERFEICOAMENTO DE PESSOAL DE NIVEL SUPERIOR - BRASIL (CAPES) [001]; FUNDACAO DE AMPARO PESQUISA DO ESTADO DE SAO PAULO -BRASIL (FAPESP) [2013/50421-2]; CONSELHO NACIONAL DE DESENVOLVIMENTO CIENTIFICO E TECNOLOGICO - BRASIL (CNPQ) [312045/2013-1, 312292/2016-3]; PROCAD/CAPES [88881.068425/2014-01]	WE WOULD LIKE TO THANK OUR COLLABORATORS AT THE LABORATORIO DE ECOLOGIA ESPACIAL E CONSERVACAO AND AT THE CORNELL LAB OF ORNITHOLOGY, ESPECIALLY GERARDO SOTO AND MARCELO ARAYA FOR THEIR HELP WITH ANALYSES. WE ALSO THANKING THE ANONYMOUS REVIEWERS. KVCB, IS GRATEFUL TO THIAGO W COSTA FOR HELP WITH THE INITIAL REVIEW OF THE MANUSCRIPT, ANDREA L BOESING AND JOAO PENA CC PENA FOR INITIAL LANDSCAPE AN…	ATLANTIC FOREST; URBAN LAND; CITY; BIODIVERSITY; URBANIZATION; COMMUNITY; DIVERSITY; AREAS	LANDSC. URBAN PLAN.	ENGLISH			ELSEVIER	2020	BARBOSA, KVD (AUTOR CORRESPONDENTE), UNIV ESTADUAL PAULISTA UNESP, INST BIOCIENCIAS, DEPT BIODIVERSIDADE, LEEC, RIO CLARO, SP, BRAZIL.	0169-2046	LANDSCAPE AND URBAN PLANNING	24	NOISE LEVEL AND WATER DISTANCE DRIVE RESIDENT AND MIGRATORY BIRD SPECIES RICHNESS WITHIN A NEOTROPICAL MEGACITY	197	São Paulo, Brazil	-23.5487	-46.6382	-	-
TAKAKURA M;MASSI K	GREEN INFRASTRUCTURE, AND SPECIFICALLY URBAN AFFORESTATION, IS ONE OF THE MOST IMPORTANT ACTIVITIES OF CITY MANAGEMENT TODAY, BECAUSE OF THE MULTITUDE OF ECOSYSTEM SERVICES IT PROVIDES. THE PATTERN OF TREE PLANTING IN URBAN AREAS IS RELATED TO AGE, ETHNICITY, EDUCATION, AND HOUSEHOLD INCOME. UNFORTUNATELY, THIS ISSUE HAS NOT BEEN EVALUATED, NOR HAS IT RECEIVED SIGNIFICANT SUBSIDIZED GOVERNMENTAL …		SAO PAULO STATE UNIV UNESP, DEPT ENVIRONM ENGN, INST SCI & TECHNOL, RODOVIA PRESIDENTE DUTRA,KM 137,8 EUGENIO MELO, BR-12247004 SAO JOSE DOS CAMPOS, SP, BRAZIL.;	ECOSYSTEM SERVICES; DEVELOPING COUNTRY; ENVIRONMENTAL POLICY; LANDSCAPE ARCHITECTURE; URBAN AFFORESTATION; URBAN PLANNING	10.1007/s00267-021-01542-2	ARTICLE			ECOSYSTEM SERVICES; URBAN FORESTS; REFORESTATION; BIODIVERSITY; VEGETATION; POLICIES; DEMAND; CITIES; SPACE	ENVIRON. MANAGE.	ENGLISH	34581838		SPRINGER	2022	MASSI, KG (AUTOR CORRESPONDENTE), SAO PAULO STATE UNIV UNESP, DEPT ENVIRONM ENGN, INST SCI & TECHNOL, RODOVIA PRESIDENTE DUTRA,KM 137,8 EUGENIO MELO, BR-12247004 SAO JOSE DOS CAMPOS, SP, BRAZIL.	0364-152X	ENVIRONMENTAL MANAGEMENT	0	WEALTH AND EDUCATION INFLUENCES ON SPATIAL PATTERN OF TREE PLANTING IN A TROPICAL METROPOLIS IN BRAZIL	69	São Paulo, Brazil	-23.5487	-46.6382	-	-
PIERANGELI G;DOMINGUES M;JESUS T;COELHO L;HANISCH W;POMPÊO M;SAIA F;GREGORACCI G;BENASSI R	FRESHWATER RESERVOIRS EMIT GREENHOUSE GASES (GHGS) SUCH AS METHANE (CH4) AND CARBON DIOXIDE (CO2), CONTRIBUTING TO GLOBAL WARMING, MAINLY WHEN IMPACTED BY UNTREATED SEWAGE AND OTHER ANTHROPOGENIC SOURCES. THESE GASES CAN BE PRODUCED BY MICROBIAL ORGANIC CARBON DECOMPOSITION, BUT LITTLE IS KNOWN ABOUT THE MICROBIOTA AND ITS PARTICIPATION IN GHG PRODUCTION AND CONSUMPTION IN THESE ENVIRONMENTS. IN …	647921	INSTITUTE OF MARINE SCIENCES, FEDERAL UNIVERSITY OF SÃO PAULO, SANTOS, BRAZIL; CENTER OF ENGINEERING, MODELING AND APPLIED SOCIAL SCIENCES, FEDERAL UNIVERSITY OF ABC, SANTO ANDRÉ, BRAZIL; CHEMICAL ENGINEERING DEPARTMENT, FEDERAL UNIVERSITY OF SÃO PAULO, DIADEMA, BRAZIL; ECOLOGY DEPARTMENT, STATE UNIVERSITY OF SÃO PAULO, SÃO PAULO, BRAZIL	ANTHROPIC POLLUTION; GREENHOUSE GASES; METAGENOMICS; NETWORK ANALYSIS; SEDIMENT MICROBIOTA	10.3389/fmicb.2021.647921	ARTICLE	FUNDAÇÃO DE AMPARO À PESQUISA DO ESTADO DE SÃO PAULOFUNDAÇÃO DE AMPARO À PESQUISA DO ESTADO DE SÃO PAULO, FAPESP, 2017/10355-1, 2017/19001-8, 2018/20417-7, 2019/23767-1 CONSELHO NACIONAL DE DESENVOLVIMENTO CIENTÍFICO E TECNOLÓGICOCONSELHO NACIONAL DE DESENVOLVIMENTO CIENTÍFICO E TECNOLÓGICO, CNPQ, 167185/2018-7	THIS STUDY WAS SUPPORTED BY THE SÃO PAULO RESEARCH FOUNDATION (FAPESP–PROCESS NUMBER: 2017/10355-1), WITH TECHNICAL TRAINING SCHOLARSHIP (PROCESS NUMBER: 2017/19001-8; 2018/20417-7; 2019/23767-1), AND BY THE BRAZILIAN NATIONAL WE WOULD LIKE TO THANK FAPESP AND CNPQ BY FUNDING THIS WORK, AND THE MULTIUSER EXPERIMENTAL CENTRAL FACILITIES OF FEDERAL UNIVERSITY OF ABC (UFABC) TRAINEES BY FIELD AND LA…	CARBON DIOXIDE; CARBON MONOXIDE; CYANIC ACID; DNA 16S; FERTILIZER; FRESH WATER; METHANE; ORGANIC CARBON; RNA 16S; ACTINOBACTERIA; ALGAL BLOOM; ALPHAPROTEOBACTERIA; ARTICLE; BACTEROIDETES; BETAPROTEOBACTERIA; BIOREMEDIATION; BIOTRANSFORMATION; COMMUNITY STRUCTURE; CYANOBACTERIUM; DECOMPOSITION; DELTAPROTEOBACTERIA; DENITRIFICATION; ELECTRIC CONDUCTIVITY; ELECTROCHEMICAL ANALYSIS; EUTROPHICATION; G…	FRONT. MICROBIOL.	ENGLISH			FRONTIERS MEDIA S.A.	2021	GREGORACCI, G.B.; INSTITUTE OF MARINE SCIENCES, BRAZIL; EMAIL: GREGORACCI@UNIFESP.BR	1664302X	FRONTIERS IN MICROBIOLOGY	5	HIGHER ABUNDANCE OF SEDIMENT METHANOGENS AND METHANOTROPHS DO NOT PREDICT THE ATMOSPHERIC METHANE AND CARBON DIOXIDE FLOWS IN EUTROPHIC TROPICAL FRESHWATER RESERVOIRS	12	São Paulo, Brazil	-23.5487	-46.6382	-	-
YOU L;NGUYEN V;PAL A;CHEN H;HE Y;REINHARD M;GIN K	PREVIOUS STUDIES SHOWED THE PRESENCE OF MULTIPLE EMERGING ORGANIC CONTAMINANTS (EOCS) IN URBAN SURFACE WATERS OF SINGAPORE EVEN THOUGH THERE ARE NO OBVIOUS DIRECT WASTEWATER DISCHARGES. IN THIS STUDY, WE INVESTIGATED THE OCCURRENCE AND DISTRIBUTION OF 17 PHARMACEUTICALS AND PERSONAL CARE PRODUCTS (PPCPS) AND ENDOCRINE DISRUPTIVE COMPOUNDS (EDCS) IN A TROPICAL URBAN CATCHMENT OF SINGAPORE. MONTHLY…		DEPARTMENT OF CIVIL AND ENVIRONMENTAL ENGINEERING, NATIONAL UNIVERSITY OF SINGAPORE, 1 ENGINEERING DRIVE 2, E1A 07-03, SINGAPORE, 117576, SINGAPORE; PUBLIC UTILITIES BOARD (PUB), ENVIRONMENT BUILDING, 40 SCOTTS ROAD, SINGAPORE; SCHOOL OF ENVIRONMENTAL SCIENCE AND ENGINEERING, SHANGHAI JIAO TONG UNIVERSITY, SHANGHAI, 200240, CHINA; NUS ENVIRONMENTAL RESEARCH INSTITUTE, NATIONAL UNIVERSITY OF SINGA…	ENDOCRINE DISRUPTORS; LIQUID CHROMATOGRAPHY-TANDEM MASS SPECTROMETRY; PPCPS; RISK ASSESSMENT; SURFACE WATER	10.1016/j.scitotenv.2015.06.041	ARTICLE	NATIONAL RESEARCH FOUNDATION SINGAPORENATIONAL RESEARCH FOUNDATION SINGAPORE, NRF	THIS RESEARCH IS FUNDED BY THE SINGAPORE NATIONAL RESEARCH FOUNDATION (NRF) AND THE PUBLICATION IS SUPPORTED UNDER THE CAMPUS FOR RESEARCH EXCELLENCE AND TECHNOLOGICAL ENTERPRISE (CREATE) PROGRAM, ADMINISTERED BY THE NUS ENVIRONMENTAL RESEARCH INSTITUTE (NERI). WE ARE GRATEFUL TO PUBLIC UTILITIES BOARD OF SINGAPORE FOR PROVIDING SUPPORT IN THIS STUDY. WE WOULD LIKE TO THANK GOH SHIN GIEK FOR DATA…	BIOCHEMICAL OXYGEN DEMAND; CAFFEINE; CATCHMENTS; CHROMATOGRAPHY; DISSOLVED OXYGEN; LIQUID CHROMATOGRAPHY; MASS SPECTROMETRY; NATURAL ATTENUATION; RESERVOIRS (WATER); RISK ASSESSMENT; RUNOFF; SALICYLIC ACID; SURFACE DISCHARGES; SURFACE WATERS; WATER POLLUTION; EMERGING ORGANIC CONTAMINANTS; ENDOCRINE DISRUPTING CHEMICALS; ENDOCRINE DISRUPTOR; LIQUID CHROMATOGRAPHY-TANDEM MASS SPECTROMETRY; OCCURRE…	SCI. TOTAL ENVIRON.	ENGLISH	26138904		ELSEVIER	2015	GIN, K.Y.H.; DEPARTMENT OF CIVIL AND ENVIRONMENTAL ENGINEERING, NATIONAL UNIVERSITY OF SINGAPORE, 1 ENGINEERING DRIVE 2, E1A 07-03, SINGAPORE	00489697	SCIENCE OF THE TOTAL ENVIRONMENT	88	INVESTIGATION OF PHARMACEUTICALS PERSONAL CARE PRODUCTS AND ENDOCRINE DISRUPTING CHEMICALS IN A TROPICAL URBAN CATCHMENT AND THE INFLUENCE OF ENVIRONMENTAL FACTORS	536	Singapore	1.35208	103.82	-	-
LI X;KOH T;ENTEKHABI D;ROTH M;PANDA J;NORFORD L	THIS STUDY EMPLOYED THE WEATHER RESEARCH AND FORECASTING MODEL WITH A SINGLE-LAYER URBAN CANOPY MODEL TO INVESTIGATE THE URBAN ENVIRONMENT OF A TROPICAL CITY, SINGAPORE. THE COUPLED MODEL WAS EVALUATED AGAINST AVAILABLE OBSERVATIONAL DATA FROM A SENSOR NETWORK AND FLUX TOWER. THE EFFECTS OF LAND USE TYPE AND ANTHROPOGENIC HEAT (AH) ON THE THERMAL AND WIND ENVIRONMENT WERE INVESTIGATED WITH A SERI…		CENSAM, SINGAPORE-MIT ALLIANCE FOR RESEARCH AND TECHNOLOGY (SMART), 1 CREATE WAY, SINGAPORE 138602, SINGAPORE; SCHOOL OF PHYSICAL AND MATHEMATICAL SCIENCES, NANYANG TECHNOLOGICAL UNIVERSITY, SINGAPORE, SINGAPORE; DEPARTMENT OF CIVIL AND ENVIRONMENTAL ENGINEERING, MASSACHUSETTS INSTITUTE OF TECHNOLOGY, CAMBRIDGE, MA, UNITED STATES; DEPARTMENT OF GEOGRAPHY, NATIONAL UNIVERSITY OF SINGAPORE, SINGAPO…	ANTHROPOGENIC HEAT; PLANETARY BOUNDARY LAYER; SEA/LAND BREEZE; URBAN CANOPY MODEL; URBAN HEAT ISLAND; WRF	10.1002/jgrd.50795	ARTICLE		NA NA NA	ATMOSPHERIC THERMODYNAMICS; LAND USE; SENSOR NETWORKS; THERMAL POLLUTION; URBAN PLANNING; WEATHER FORECASTING; ANTHROPOGENIC HEAT; PLANETARY BOUNDARY LAYERS; SEA/LAND BREEZE; URBAN CANOPY MODELS; URBAN HEAT ISLAND; WRF; TROPICS; ATMOSPHERIC MODELING; BOUNDARY LAYER; DATA SET; FLUX MEASUREMENT; FORECASTING METHOD; HEAT BALANCE; HEAT ISLAND; LAND BREEZE; POTENTIAL ENERGY; SEA BREEZE; TROPICAL ENVIR…	J. GEOPHYS. RES. D ATMOS.	ENGLISH		17	BLACKWELL PUBLISHING LTD	2013	LI, X.-X.; CENSAM, SINGAPORE-MIT ALLIANCE FOR RESEARCH AND TECHNOLOGY (SMART), 1 CREATE WAY, SINGAPORE 138602, SINGAPORE; EMAIL: LIXX@SMART.MIT.EDU	21698996	JOURNAL OF GEOPHYSICAL RESEARCH ATMOSPHERES	83	A MULTIRESOLUTION ENSEMBLE STUDY OF A TROPICAL URBAN ENVIRONMENT AND ITS INTERACTIONS WITH THE BACKGROUND REGIONAL ATMOSPHERE	118	Singapore	1.35208	103.82	-	-
NG B;ZHOU J;GIANNIS A;CHANG V;WANG J	TO ENHANCE LOCAL WATER SECURITY, THE SINGAPORE GOVERNMENT PROMOTES TWO WATER CONSERVATION POLICIES: THE USE OF ECO-FRIENDLY TOILETS TO REDUCE YELLOW WATER (YW) DISPOSAL AND THE INSTALLATION OF WATER EFFICIENT DEVICES TO MINIMIZE GRAY WATER (GW) DISCHARGE. THE PROPOSED WATER CONSERVATION POLICIES HAVE DIFFERENT IMPACTS ON THE ENVIRONMENTAL PERFORMANCE OF LOCAL WASTEWATER MANAGEMENT. THE MAIN PURPO…		NANYANG TECHNOL UNIV, SCH CIVIL & ENVIRONM ENGN, DIV ENVIRONM & WATER RESOURCES, SINGAPORE 639798, SINGAPORE.; NANYANG TECHNOL UNIV, NANYANG ENVIRONM & WATER RES INST, RESIDUES & RESOURCE RECLAMAT CTR R3C, SINGAPORE 637141, SINGAPORE.;	LIFE CYCLE ASSESSMENT; CONVENTIONAL WASTEWATER MANAGEMENT SYSTEM; WATER CONSERVATION POLICY; LIFE CYCLE COSTING	10.1016/j.jenvman.2014.01.052	ARTICLE	NATIONAL RESEARCH FOUNDATION, SINGAPORE; SCHOOL OF CIVIL AND ENVIRONMENTAL ENGINEERING/RESIDUES AND RESOURCE RECLAMATION CENTRE, NANYANG TECHNOLOGICAL UNIVERSITY, SINGAPORE [NRF-CRP5-2009-02]	THIS STUDY IS SUPPORTED BY THE NATIONAL RESEARCH FOUNDATION, SINGAPORE; PROGRAM NUMBER NRF-CRP5-2009-02, FOR THE SCHOOL OF CIVIL AND ENVIRONMENTAL ENGINEERING/RESIDUES AND RESOURCE RECLAMATION CENTRE, NANYANG TECHNOLOGICAL UNIVERSITY, SINGAPORE.	URINE; DESALINATION; PERFORMANCE; SEAWATER; IMPACT; BRINE	J. ENVIRON. MANAGE.	ENGLISH	24726966		ACADEMIC PRESS LTD- ELSEVIER SCIENCE LTD	2014	CHANG, VWC (AUTOR CORRESPONDENTE), NANYANG TECHNOL UNIV, SCH CIVIL & ENVIRONM ENGN, DIV ENVIRONM & WATER RESOURCES, 50 NANYANG AVE, SINGAPORE 639798, SINGAPORE.	0301-4797	JOURNAL OF ENVIRONMENTAL MANAGEMENT	36	ENVIRONMENTAL LIFE CYCLE ASSESSMENT OF DIFFERENT DOMESTIC WASTEWATER STREAMS POLICY EFFECTIVENESS IN A TROPICAL URBAN ENVIRONMENT	140	Singapore	1.35208	103.82	-	-
YANG L;NGUYEN D;JIA S;REID J;YU L	DAILY AMBIENT PM2.5 WAS COLLECTED DURING 8 SEPTEMBER TO 5 OCTOBER (JULIAN DAYS, JDS 252-279), 2008 IN SINGAPORE TO INVESTIGATE IMPACTS OF TRANSBOUNDARY BIOMASS BURNING SMOKE ON DISTRIBUTION AMONG C2-C5 DICARBOXYLIC ACIDS (DCAS) AND CORRESPONDING DICARBOXYLATE SALTS (DCS) IN THE TROPICAL URBAN ATMOSPHERE. QUANTIFICATION OF DCAS AND DCS WERE PERFORMED USING SOLVENT AND WATER EXTRACTION FOLLOWED BY …		DEPARTMENT OF CIVIL AND ENVIRONMENTAL ENGINEERING, NATIONAL UNIVERSITY OF SINGAPORE, SINGAPORE; MARINE METEOROLOGY DIVISION, NAVAL RESEARCH LABORATORY, MONTEREY, CA, UNITED STATES; NUS ENVIRONMENTAL RESEARCH INSTITUTE, NATIONAL UNIVERSITY OF SINGAPORE, SINGAPORE	LEVOGLUCOSAN; PHOTOOXIDATION; PM2.5; SOUTHEAST ASIA; TRANSBOUNDARY	10.1016/j.atmosenv.2012.03.049	ARTICLE		THE SUPPORT OF THE NUS ENVIRONMENTAL RESEARCH INSTITUTE (NERI), NATIONAL UNIVERSITY OF SINGAPORE IS APPRECIATED. DR. REID’S PARTICIPATION WAS FUNDED BY THE NAVAL RESEARCH LABORATORY BASE RESEARCH PROGRAM . NA NA	BIOMASS BURNING SMOKES; CONCENTRATION RATIO; DICARBOXYLATE SALTS; LEVOGLUCOSAN; SOUTHEAST ASIA; TRANS-BOUNDARY; URBAN ATMOSPHERES; URBAN ENVIRONMENTS; CARBOXYLATION; CHROMATOGRAPHY; PHOTOOXIDATION; SALTS; URBAN PLANNING; SMOKE; DICARBOXYLIC ACID DERIVATIVE; MALIC ACID; AMBIENT AIR; ANTHROPOGENIC SOURCE; ATMOSPHERIC POLLUTION; BIOMASS BURNING; CARBOXYLIC ACID; CONCENTRATION (COMPOSITION); PARTICUL…	ATMOS. ENVIRON.	ENGLISH				2013	YU, L.E.; DEPARTMENT OF CIVIL AND ENVIRONMENTAL ENGINEERING, SINGAPORE; EMAIL: LIYA.YU@NUS.EDU.SG	13522310	ATMOSPHERIC ENVIRONMENT	34	IMPACTS OF BIOMASS BURNING SMOKE ON THE DISTRIBUTIONS AND CONCENTRATIONS OF C2C5 DICARBOXYLIC ACIDS AND DICARBOXYLATES IN A TROPICAL URBAN ENVIRONMENT	78	Singapore	1.35208	103.82	-	-
WANG J;CHUA L;SHANAHAN P	NON-POINT SOURCE POLLUTION IS A PREVALENT PROBLEM THROUGHOUT THE WORLD. BIORETENTION BASINS HAVE BEEN DEPLOYED WORLDWIDE TO TREAT STORMWATER RUNOFF AND ALLEVIATE EUTROPHICATION IN DOWNSTREAM WATER RESOURCES. HOWEVER, BASIN PERFORMANCE IN THE TROPICS IS POORLY UNDERSTOOD. GIVEN THE DISTINCTLY DIFFERENT RAINFALL-RUNOFF CHARACTERISTICS OF TROPICAL CLIMATES, WHETHER BASINS THAT ARE BUILT ACCORDING TO…		MIT, DEPT CIVIL & ENVIRONM ENGN, 77 MASSACHUSETTS AVE, CAMBRIDGE, MA 02139 USA.; DEAKIN UNIV, SCH ENGN, FAC SCI ENGN & BUILT ENVIRONM, 75 PIGDONS RD, WAURN PONDS, VIC 3220, AUSTRALIA.;		10.1039/c6ew00285d	ARTICLE	NATIONAL RESEARCH FOUNDATION, PRIME MINISTER'S OFFICE, SINGAPORE THROUGH SINGAPORE MIT ALLIANCE FOR RESEARCH AND TECHNOLOGY'S CENTER FOR ENVIRONMENTAL SENSING AND MODELING RESEARCH PROGRAM	THIS RESEARCH WAS FUNDED BY THE NATIONAL RESEARCH FOUNDATION, PRIME MINISTER'S OFFICE, SINGAPORE THROUGH THE SINGAPORE MIT ALLIANCE FOR RESEARCH AND TECHNOLOGY'S CENTER FOR ENVIRONMENTAL SENSING AND MODELING RESEARCH PROGRAM.	NITROGEN REMOVAL; PERFORMANCE; PHOSPHORUS; HYDROLOGY; CAPTURE; QUALITY; SYSTEMS; SITES; FLOW; CELL	ENVIRON. SCI.-WAT. RES. TECHNOL.	ENGLISH			ROYAL SOC CHEMISTRY	2017	SHANAHAN, P (AUTOR CORRESPONDENTE), MIT, DEPT CIVIL & ENVIRONM ENGN, 77 MASSACHUSETTS AVE, CAMBRIDGE, MA 02139 USA.	2053-1400	ENVIRONMENTAL SCIENCE-WATER RESEARCH & TECHNOLOGY	32	EVALUATION OF POLLUTANT REMOVAL EFFICIENCY OF A BIORETENTION BASIN AND IMPLICATIONS FOR STORMWATER MANAGEMENT IN TROPICAL CITIES	3	Singapore	1.35208	103.82	-	-
WANG J;POH C;TAN C;LEE V;JAIN A;WEBB E	CONSERVATION OF FAUNAL DIVERSITY IN HIGHLY URBANIZED LANDSCAPES IS FACILITATED THROUGH THE INTEGRATION OF ANTHROPOGENIC AND NATURAL ELEMENTS IN URBAN GREEN SPACES. ROOF GARDENS HAVE THE POTENTIAL TO PROVIDE RESOURCES FOR URBAN WILDLIFE POPULATIONS, YET THEY TYPICALLY OFFER MARGINAL ECOLOGICAL CONDITIONS RELATIVE TO GROUND-LEVEL HABITAT SO IT IS NECESSARY TO IDENTIFY THE FACTORS ASSOCIATED WITH FO…	E01905	NATL PK BOARD, 1 CLUNY RD, SINGAPORE S259569, SINGAPORE.; NATL UNIV SINGAPORE, DEPT GEOG, 1 ARTS LINK, SINGAPORE S117570, SINGAPORE.; NATL UNIV SINGAPORE, DEPT BIOL SCI, SCI DR 4, SINGAPORE S117543, SINGAPORE.; BIRDLIFE INT ASIA, 354 TANGLIN RD, SINGAPORE S247672, SINGAPORE.;	CONSERVATION; GREEN ROOFS; RECONCILIATION ECOLOGY; URBAN ECOLOGY; URBAN GREEN SPACE	10.1002/ecs2.1905	ARTICLE	NATIONAL PARKS BOARD, SINGAPORE	THIS RESEARCH WAS FUNDED BY THE NATIONAL PARKS BOARD, SINGAPORE. THE AUTHORS WISH TO THANK JOLENE LIM AND ANISHA RAJBHANDARI FOR FIELDWORK ASSISTANCE; BENJAMIN LEE FOR ADVICE ON NOISE MEASUREMENTS; LOK YAN LING, TAY BEE CHOO, AND RACHEL TEO FOR INFORMATION ON ROOF GARDENS IN SINGAPORE; AND THE BUILDING OWNERS AND MANAGEMENT OF ALL OUR SITES FOR ACCESS TO THEIR ROOF GARDENS, INCLUDING ANG MO KIO T…	GREEN ROOFS; FUNCTIONAL DIVERSITY; COMMUNITY STRUCTURE; SPECIES RICHNESS; COMPACT CITY; CONSERVATION; HABITAT; URBANIZATION; LANDSCAPE; AREAS	ECOSPHERE	ENGLISH			WILEY	2017	WEBB, EL (AUTOR CORRESPONDENTE), NATL UNIV SINGAPORE, DEPT BIOL SCI, SCI DR 4, SINGAPORE S117543, SINGAPORE.	2150-8925	ECOSPHERE	30	BUILDING BIODIVERSITY DRIVERS OF BIRD AND BUTTERFLY DIVERSITY ON TROPICAL URBAN ROOF GARDENS	8	Singapore	1.35208	103.82	-	-
MEILI N;ACERO J;PELEG N;MANOLI G;BURLANDO P;FATICHI S	AN INCREASE IN URBAN VEGETATION IS AN OFTEN PROPOSED MITIGATION STRATEGY TO REDUCE URBAN HEAT AND IMPROVE OUTDOOR THERMAL COMFORT (OTC). VEGETATION CAN ALTER URBAN MICROCLIMATE THROUGH CHANGES IN AIR TEMPERATURE, MEAN RADIANT TEMPERATURE, HUMIDITY, AND WIND SPEED. IN THIS STUDY, WE MODEL HOW STREET TREE AND GROUND VEGETATION COVER AND THEIR STRUCTURAL, OPTICAL, INTERCEPTION, AND PHYSIOLOGICAL TRA…	107733	SINGAPORE ETH CTR, FUTURE CITIES LAB, 1 CREATE WAY, SINGAPORE 138602, SINGAPORE.; SWISS FED INST TECHNOL, INST ENVIRONM ENGN, STEFANO FRANSCINI PL 5, CH-8093 ZURICH, SWITZERLAND.; SINGAPORE MIT ALLIANCE RES & TECHNOL, CENSAM, 1 CREATE WAY, SINGAPORE 138602, SINGAPORE.; UCL, DEPT CIVIL ENVIRONM & GEOMAT ENGN, LONDON WC1E 6BT, ENGLAND.; NATL UNIV SINGAPORE, DEPT CIVIL & ENVIRONM ENGN, 1 ENGN DR 2, …	OUTDOOR THERMAL COMFORT; UTCI; URBAN VEGETATION; ECOSYSTEM SERVICES; HEAT MITIGATION IN THE TROPICS; URBAN ECOHYDROLOGICAL MODEL	10.1016/j.buildenv.2021.107733	ARTICLE	ETH ZURICH [FI370074016]; SINGAPORE'S NATIONAL RESEARCH FOUNDATION UNDER ITS CAMPUS FOR RESEARCH EXCELLENCE AND TECHNOLOGICAL ENTERPRISE PROGRAMME [FI370074016]; SINGAPORE'S NATIONAL RESEARCH FOUNDATION (NRF) UNDER ITS VIRTUAL SINGAPORE PROGRAMME; BRANCO WEISS FELLOWSHIP - SOCIETY IN SCIENCE; SINGAPORE MINISTRY OF EDUCATION ACADEMIC RESEARCH FUND TIER 1	THE RESEARCH WAS CONDUCTED AT THE FUTURE CITIES LABORATORY AT THE SINGAPORE-ETH CENTRE, WHICH WAS ESTABLISHED COLLABORATIVELY BETWEEN ETH ZURICH AND SINGAPORE'S NATIONAL RESEARCH FOUNDATION (FI370074016) UNDER ITS CAMPUS FOR RESEARCH EXCELLENCE AND TECHNOLOGICAL ENTERPRISE PROGRAMME. JAA CONDUCTED HIS RESEARCH UNDER THE COOLING SINGAPORE PROJECT, FUNDED BY SINGAPORE'S NATIONAL RESEARCH FOUNDATION…	URBAN HEAT ISLANDS; SENSITIVITY-ANALYSIS; ECOHYDROLOGICAL MODEL; CLIMATE; TREES; PARAMETERIZATION; DESIGN; IMPACT; INDEX; ROUGHNESS	BUILD. ENVIRON.	ENGLISH			PERGAMON-ELSEVIER SCIENCE LTD	2021	MEILI, N (AUTOR CORRESPONDENTE), SINGAPORE ETH CTR, FUTURE CITIES LAB, 1 CREATE WAY, SINGAPORE 138602, SINGAPORE.	0360-1323	BUILDING AND ENVIRONMENT	16	VEGETATION COVER AND PLANTTRAIT EFFECTS ON OUTDOOR THERMAL COMFORT IN A TROPICAL CITY	195	Singapore	1.35208	103.82	-	-
DISSEGNA M;YIN T;WEI S;RICHARDS D;GRET-REGAMEY A	INCREASED URBANIZATION AND CLIMATE CHANGE HAVE RESULTED IN THE INTENSIFICATION OF THE URBAN HEAT ISLAND (UHI) EFFECT, PARTICULARLY IN TROPICAL CITIES. ONE OF THE MAIN CAUSES OF UHI IS THE MAN-MADE URBAN SURFACES INFLUENCING THE RADIATION BUDGET BY ABSORBING, REFLECTING, AND EMITTING RADIATION AT VARIOUS WAVELENGTHS. THE RADIATIVE BUDGET OF A CITY IS DIRECTLY INFLUENCED BY THE URBAN GEOMETRY, SURF…	700	SINGAPORE ETH CTR, FUTURE CITIES LAB, 1 CREATE WAY, SINGAPORE 138602, SINGAPORE.; UNIV MARYLAND, EARTH SYST SCI INTERDISCIPLINARY CTR, COLLEGE PK, MD 20740 USA.; SINGAPORE MIT ALLIANCE RES & TECHNOL, SINGAPORE 138602, SINGAPORE.; SWISS FED INST TECHNOL, CHAIR PLANNING LANDSCAPE & URBAN SYST, CH-8093 ZURICH, SWITZERLAND.;	URBAN VEGETATION; LEAF AREA DENSITY; RADIATIVE TRANSFER MODELING; 3-D URBAN MODEL RECONSTRUCTION	10.3390/f10080700	ARTICLE	SINGAPORE NATIONAL PARKS BOARD (NPARKS) PROJECT "REMOTE SENSING FOR URBAN TREE MANAGEMENT: SPECIES CLASSIFICATION AND HEALTH MONITORING"; ETH ZURICH [FI 370074016]; SINGAPORE'S NATIONAL RESEARCH FOUNDATION [FI 370074016]	THIS RESEARCH WAS CONDUCTED AT THE FUTURE CITIES LABORATORY, SINGAPORE-ETH CENTRE, WHICH WAS ESTABLISHED COLLABORATIVELY BETWEEN ETH ZURICH AND SINGAPORE'S NATIONAL RESEARCH FOUNDATION (FI 370074016) UNDER ITS CAMPUS FOR RESEARCH EXCELLENCE AND TECHNOLOGICAL ENTERPRISE PROGRAMME. SHANSHAN WEI IS FUNDED BY THE SINGAPORE NATIONAL PARKS BOARD (NPARKS) PROJECT "REMOTE SENSING FOR URBAN TREE MANAGEMEN…	TRANSFER MODEL; DENSITY; TEMPERATURE; ENVIRONMENT; CLIMATE; FLUXES; TREES	FORESTS	ENGLISH			MDPI	2019	YIN, TG (AUTOR CORRESPONDENTE), UNIV MARYLAND, EARTH SYST SCI INTERDISCIPLINARY CTR, COLLEGE PK, MD 20740 USA.		FORESTS	15	3D RECONSTRUCTION OF AN URBAN LANDSCAPE TO ASSESS THE INFLUENCE OF VEGETATION IN THE RADIATIVE BUDGET	10	Singapore	1.35208	103.82	-	-
MANOCHA N;BABOVIC V	IN CASES, WHICH ARE CHARACTERIZED BY DEEP UNCERTAINTY IT IS APPROPRIATE TO DEVELOP DYNAMIC AND ADAPTABLE PLANS. THIS PAPER PRESENTS AN APPROACH THAT USES MULTI-OBJECTIVE GENETIC ALGORITHMS TO AUTOMATE THE DEVELOPMENT OF DYNAMIC ADAPTATION PATHWAYS FOR STORMWATER MANAGEMENT FOR A TROPICAL URBAN CATCHMENT LOCATED IN SINGAPORE. PATHWAYS SPANNING A RANGE OF CLIMATE AND LANDUSE SCENARIOS ARE DEVELOPED…		NATL UNIV SINGAPORE, SINGAPORE 117576, SINGAPORE.;	ADAPTATION PATHWAYS; UNCERTAINTY; CLIMATE CHANGE; URBAN DRAINAGE; REAL OPTIONS; MULTI-OBJECTIVE OPTIMIZATION	10.1016/j.envsci.2018.09.012	ARTICLE			CLIMATE; ADAPTATION	ENVIRON. SCI. POLICY	ENGLISH			ELSEVIER SCI LTD	2018	MANOCHA, N (AUTOR CORRESPONDENTE), NATL UNIV SINGAPORE, SINGAPORE 117576, SINGAPORE.	1462-9011	ENVIRONMENTAL SCIENCE & POLICY	10	REAL OPTIONS MULTIOBJECTIVE OPTIMIZATION AND THE DEVELOPMENT OF DYNAMICALLY ROBUST ADAPTIVE PATHWAYS	90	Singapore	1.35208	103.82	-	-
FUNG T;RICHARDS D;LEONG R;GHOSH S;TAN C;DRILLET Z;LEONG K;EDWARDS P	HEALTHY SOIL ECOSYSTEMS ARE IMPORTANT FOR URBAN SUSTAINABILITY, BECAUSE THEY PROVIDE THE BASIS FOR ECOSYSTEM SERVICES SUCH AS FLOOD REGULATION, NUTRIENT CYCLING AND CARBON SEQUESTRATION. WE INVESTIGATED THE SOILS BENEATH FIVE TYPES OF URBAN LAND COVER IN THE TROPICAL CITY OF SINGAPORE-SECONDARY FOREST, MANAGED GRASS, SHRUBS, TREES, AND TREES WITH SHRUBS. WE QUANTIFIED THE CAPACITY OF THESE SOILS …		SWISS FED INST TECHNOL, SINGAPORE ETH CTR, FUTURE CITIES LAB, SINGAPORE, SINGAPORE.; NATL UNIV SINGAPORE, DEPT BIOL SCI, CTR NAT BASED CLIMATE SOLUT, SINGAPORE, SINGAPORE.; NATL PK BOARD, CTR URBAN GREENERY & ECOL, SINGAPORE, SINGAPORE.; UNIV NEW ENGLAND, SCH ENVIRONM & RURAL SCI, ARMIDALE, NSW 2351, AUSTRALIA.;	URBAN SOILS; VEGETATION MANAGEMENT; ECOSYSTEM FUNCTIONS; URBAN LAND COVERS; LITTER DECOMPOSITION; INFILTRATION; TROPICAL CITY	10.1007/s11252-021-01126-2	ARTICLE	SINGAPORE'S NATIONAL RESEARCH FOUNDATION [FI 370074016]; ETH ZURICH [FI 370074016]	THE RESEARCH WAS CONDUCTED AT THE FUTURE CITIES LABORATORY AT THE SINGAPORE-ETH CENTRE, WHICH WAS ESTABLISHED COLLABORATIVELY BETWEEN ETH ZURICH AND SINGAPORE'S NATIONAL RESEARCH FOUNDATION (FI 370074016) UNDER ITS CAMPUS FOR RESEARCH EXCELLENCE AND TECHNOLOGICAL ENTERPRISE PROGRAMME. THE FUNDERS HAD NO ROLE IN STUDY DESIGN, DATA COLLECTION AND ANALYSIS, DECISION TO PUBLISH, OR PREPARATION OF THE…	TEA BAG INDEX; ECOSYSTEM SERVICES; PHYSICAL-PROPERTIES; HABITAT COMPLEXITY; ADINANDRA BELUKAR; VEGETATION; FOREST; STORMWATER; MANAGEMENT; SINGAPORE	URBAN ECOSYST.	ENGLISH			SPRINGER	2022	FUNG, TK (AUTOR CORRESPONDENTE), SWISS FED INST TECHNOL, SINGAPORE ETH CTR, FUTURE CITIES LAB, SINGAPORE, SINGAPORE.; FUNG, TK (AUTOR CORRESPONDENTE), NATL UNIV SINGAPORE, DEPT BIOL SCI, CTR NAT BASED CLIMATE SOLUT, SINGAPORE, SINGAPORE.	1083-8155	URBAN ECOSYSTEMS	4	LITTER DECOMPOSITION AND INFILTRATION CAPACITIES IN SOILS OF DIFFERENT TROPICAL URBAN LAND COVERS	25	Singapore	1.35208	103.82	-	-
HE W;ZHANG L;YUAN C	URBAN AIR TEMPERATURE PROJECTION IS ESSENTIAL TO PREPARE CITIES FOR FUTURE HEAT RISKS. THIS STUDY AIMS TO ANTICIPATE FUTURE AIR TEMPERATURE INCREMENT CONTRIBUTED BY CLIMATE CHANGE AND URBANIZATION. FIRST, WE IDENTIFIED THE RURAL AREA IN SINGAPORE BY HISTORICAL DATA, AND DOWNSCALED GLOBAL/ REGIONAL MODELLING RESULTS TO INVESTIGATE CLIMATE CHANGE AT THE IDENTIFIED RURAL AREA. REPRESENTATIVE CONCENT…	101115	NATL UNIV SINGAPORE, DEPT ARCHITECTURE, 4 ARCHITECTURE DR, SINGAPORE 117566, SINGAPORE.;	FUTURE AIR TEMPERATURE; GLOBAL CLIMATE CHANGE; URBANIZATION; DOWNSCALING; URBAN MORPHOLOGY PARAMETERS; URBAN-RURAL TEMPERATURE DIFFERENCE	10.1016/j.uclim.2022.101115	ARTICLE	SINGAPORE NATIONAL RESEARCH FOUNDATION (NRF) UNDER ITS CAMPUS FOR RESEARCH EXCELLENCE AND TECHNO-LOGICAL ENTERPRISE (CREATE) PROGRAMME: SINGAPORE ETH CENTRE, FUTURE RESILIENCE SYSTEM II GRANT [R-295-000-169-592]; SINGAPORE MINISTRY OF EDUCATION, NUS PRESIDENTIAL YOUNG PROFESSORSHIP [R-295-000-172-133]	THIS RESEARCH IS SUPPORTED BY SINGAPORE NATIONAL RESEARCH FOUNDATION (NRF) UNDER ITS CAMPUS FOR RESEARCH EXCELLENCE AND TECHNO-LOGICAL ENTERPRISE (CREATE) PROGRAMME: SINGAPORE ETH CENTRE, FUTURE RESILIENCE SYSTEM II GRANT (GRANT NO. R-295-000-169-592), AND SINGAPORE MINISTRY OF EDUCATION, NUS PRESIDENTIAL YOUNG PROFESSORSHIP (GRANT NO. R-295-000-172-133). AUTHORS THANK SINGAPORE NATIONAL ENVIRONM…	URBAN HEAT-ISLAND; SKY VIEW FACTOR; BIAS CORRECTION; DOWNSCALING METHODS; BUILDING DENSITY; STREET CANYONS; CHANGE IMPACT; MODEL; ADAPTATION; INTENSITY	URBAN CLIM.	ENGLISH			ELSEVIER	2022	YUAN, C (AUTOR CORRESPONDENTE), NATL UNIV SINGAPORE, DEPT ARCHITECTURE, 4 ARCHITECTURE DR, SINGAPORE 117566, SINGAPORE.	2212-0955	URBAN CLIMATE	1	FUTURE AIR TEMPERATURE PROJECTION IN HIGHDENSITY TROPICAL CITIES BASED ON GLOBAL CLIMATE CHANGE AND URBANIZATION A STUDY IN SINGAPORE	42	Singapore	1.35208	103.82	-	-
OH R;RICHARDS D;YEE A	COMMUNITY-DRIVEN VERTICAL GREENERY PROVIDES A PREVIOUSLY UNDER-APPRECIATED RESOURCE THAT COULD BE AN IMPORTANT COMPONENT OF TROPICAL URBAN ECOLOGY. WHILE THE CORRIDORS OF BUILDINGS HAVE BEEN DESIGNED TO FACILITATE THE CIRCULATION OF RESIDENTS BETWEEN SPACES, THIS STUDY SHOWS THAT SUCH CORRIDORS INCIDENTALLY SERVED AS AN INFORMAL SPACE FOR COMMUNITY-DRIVEN VERTICAL GREENERY. ACROSS 1.86 HA OF SURV…		NATL PK BOARD, CTR URBAN GREENERY & ECOL, SINGAPORE, SINGAPORE.; SINGAPORE ETH CTR, FUTURE CITIES LAB, ETH ZURICH, SINGAPORE, SINGAPORE.;	ECOSYSTEM SERVICES; VERTICAL GREENERY; URBAN ECOLOGY; INFORMAL GREEN SPACE; GARDEN	10.1016/j.landurbplan.2017.08.014	ARTICLE	FUTURE CITIES LABORATORY AT THE SINGAPORE-ETH CENTRE UNDER ITS CAMPUS FOR RESEARCH EXCELLENCE AND TECHNOLOGICAL ENTERPRISE PROGRAMME [FI 370074016]; ETH ZURICH UNDER ITS CAMPUS FOR RESEARCH EXCELLENCE AND TECHNOLOGICAL ENTERPRISE PROGRAMME [FI 370074016]; SINGAPORE'S NATIONAL RESEARCH FOUNDATION UNDER ITS CAMPUS FOR RESEARCH EXCELLENCE AND TECHNOLOGICAL ENTERPRISE PROGRAMME [FI 370074016]	THE AUTHORS WISH TO THANK NG SILI AND LEE WAN HOON FOR THEIR RESEARCH ASSISTANCE IN THIS STUDY, AND COLLEAGUES FROM THE SINGAPORE HERBARIUM (SING) FOR THEIR KIND ASSISTANCE IN PLANT IDENTIFICATIONS. WE ARE GRATEFUL ALSO TO OUR THREE REVIEWERS FOR THEIR INSIGHTFUL COMMENTS. D.R.R. WAS SUPPORTED BY THE FUTURE CITIES LABORATORY AT THE SINGAPORE-ETH CENTRE, WHICH WAS ESTABLISHED COLLABORATIVELY BETWE…	DAYLIGHT ILLUMINANCE; URBAN GREENERY; SHADE; CONSERVATION; ROOFS; ENVIRONMENT; ADAPTATION; LANDSCAPE; ECOLOGY; PEOPLE	LANDSC. URBAN PLAN.	ENGLISH			ELSEVIER SCIENCE BV	2018	OH, RRY (AUTOR CORRESPONDENTE), NATL PK BOARD, CTR URBAN GREENERY & ECOL, SINGAPORE, SINGAPORE.	0169-2046	LANDSCAPE AND URBAN PLANNING	8	COMMUNITYDRIVEN SKYRISE GREENERY IN A DENSE TROPICAL CITY PROVIDES BIODIVERSITY AND ECOSYSTEM SERVICE BENEFITS	169	Singapore	1.35208	103.82	-	-
VELASCO E;ROTH M;NORFORD L;MOLINA L	MANY CITIES ARE DEVELOPING POLICIES TO PROMOTE GREENERY AS A MEASURE TO REDUCE THEIR NET GREENHOUSE GAS EMISSIONS. STUDIES SUGGEST THAT URBAN FORESTS MAY REPRESENT AN IMPORTANT CARBON RESERVOIR. HOWEVER, THE POTENTIAL TO DIRECTLY REMOVE CARBON DIOXIDE (CO2) FROM THE ATMOSPHERE BY URBAN VEGETATION IS STILL POORLY SUPPORTED BY SCIENTIFIC EVIDENCE. CURRENT ASSESSMENTS CONSIDER ONLY THE CARBON ACCUMU…		SMART, CTR ENVIRONM SENSING & MODELING CENSAM, 1 CREATE WAY,09-03 CREATE TOWER, SINGAPORE 138602, SINGAPORE.; NATL UNIV SINGAPORE, DEPT GEOG, SINGAPORE 117548, SINGAPORE.; MOLINA CTR ENERGY & ENVIRONM, LA JOLLA, CA USA.;	CARBON SEQUESTRATION; URBAN GREENERY; URBAN FORESTRY; GREENHOUSE GAS EMISSIONS; CARBON DIOXIDE; EDDY COVARIANCE	10.1016/j.landurbplan.2015.12.003	ARTICLE	NATIONAL RESEARCH FOUNDATION SINGAPORE THROUGH THE SINGAPORE MIT ALLIANCE FOR RESEARCH AND TECHNOLOGY'S CENSAM RESEARCH PROGRAM; NATIONAL UNIVERSITY OF SINGAPORE [R-109-000-091-112]; NATIONAL INSTITUTE OF ECOLOGY AND CLIMATE CHANGE; AIR QUALITY MONITORING NETWORK OF MEXICO CITY OF THE MINISTRY OF ENVIRONMENT OF THE FEDERAL DISTRICT GOVERNMENT	THE RESEARCH IN SINGAPORE WAS SUPPORTED BY THE NATIONAL RESEARCH FOUNDATION SINGAPORE THROUGH THE SINGAPORE MIT ALLIANCE FOR RESEARCH AND TECHNOLOGY'S CENSAM RESEARCH PROGRAM AND A NATIONAL UNIVERSITY OF SINGAPORE GRANT TO MR (RESEARCH GRANT R-109-000-091-112). THE RESEARCH IN MEXICO CITY WAS SUPPORTED BY THE NATIONAL INSTITUTE OF ECOLOGY AND CLIMATE CHANGE AND THE AIR QUALITY MONITORING NETWORK …	CO2 EMISSIONS; DIOXIDE; FLUX; BIOMASS; SOIL; FORESTS; CITY; RESPIRATION; VARIABILITY; BALANCE	LANDSC. URBAN PLAN.	ENGLISH			ELSEVIER	2016	VELASCO, E (AUTOR CORRESPONDENTE), SMART, CTR ENVIRONM SENSING & MODELING CENSAM, 1 CREATE WAY,09-03 CREATE TOWER, SINGAPORE 138602, SINGAPORE.	0169-2046	LANDSCAPE AND URBAN PLANNING	100	DOES URBAN VEGETATION ENHANCE CARBON SEQUESTRATION	148	Singapore and Mexico City, Mexico	1.35208	103.82	19.4326	-99.1332
HWANG Y;LUM Q;CHAN Y	AS SINGAPORE IS NEAR THE EQUATOR, HEAT IS A CONCERN, ESPECIALLY GIVEN THE INCREASING YEARLY AVERAGE TEMPERATURES AND SIGNIFICANT URBAN HEAT ISLAND EFFECTS. NATIONAL GREENING POLICIES PROPOSE INCREASING THE NUMBER OF PARKS; THIS MAY INDIRECTLY BENEFIT THERMAL CONDITIONS AT A MACRO LEVEL, BUT THERE HAS BEEN LITTLE CONSIDERATION OF THE THERMAL ENVIRONMENT WITHIN THESE SPACES. THIS STUDY EXAMINED MIC…		NATL UNIV SINGAPORE, SCH DESIGN & ENVIRONM, DEPT ARCHITECTURE, SINGAPORE 117548, SINGAPORE.;	MICRO-SCALE THERMAL PERFORMANCE; TROPICAL URBAN PARKS; PARK SETTINGS; SHADE; SINGAPORE	10.1016/j.buildenv.2015.10.003	ARTICLE	MND RESEARCH FUND (MNDRF) FOR THE BUILT ENVIRONMENT [R-295-000-095-490]	THIS WORK WAS MADE POSSIBLE BY FUNDING FROM MND RESEARCH FUND (MNDRF) FOR THE BUILT ENVIRONMENT UNDER GRANT NUMBER R-295-000-095-490. THE AUTHORS ALSO WISH TO ACKNOWLEDGE AND THANK ZI EN JONATHAN YUE, RESEARCH ASSISTANT IN NUS, FOR TECHNICAL SUPPORT. THANKS ALSO TO MS. YUIN-MAE, NG, DEPUTY DIRECTOR OF DEVELOPMENT MANAGEMENT IN THE NATIONAL PARKS BOARD SINGAPORE, WHO COLLABORATED FOR THE PARK SELE…	HEAT-ISLAND; GREEN AREAS; COMFORT; MICROCLIMATE; DESIGN; STREET; SPACES; POWER	BUILD. ENVIRON.	ENGLISH		2	PERGAMON-ELSEVIER SCIENCE LTD	2015	HWANG, YH (AUTOR CORRESPONDENTE), 4 ARCHITECTURE DR, SINGAPORE 117566, SINGAPORE.	0360-1323	BUILDING AND ENVIRONMENT	39	MICROSCALE THERMAL PERFORMANCE OF TROPICAL URBAN PARKS IN SINGAPORE	94	Singapure	1.35208	103.82	-	-
BELCHER R;CHISHOLM R	EFFECTIVE URBAN PLANNING DEPENDS ON KNOWING HOMEBUYERS' PREFERENCES FOR NEIGHBOURHOOD FEATURES THAT PROVIDE DIFFERENT AMENITIES, SUCH AS MANAGED PARKS AND TREES. AS THE EXPANSION OF TROPICAL URBAN AREAS INTO BIODIVERSITY HOTSPOTS IS PREDICTED TO MORE THAN DOUBLE BY 2030, KNOWING HOMEBUYERS UTILITY FROM DIFFERENT VEGETATION TYPES CAN CONTRIBUTE TO GLOBAL BIODIVERSITY CONSERVATION STRATEGIES. WE US…		NATL UNIV SINGAPORE, DEPT BIOL SCI, SINGAPORE 117543, SINGAPORE.; SINGAPORE ETH CTR, FUTURE CITIES LAB, ETH ZURICH, SINGAPORE, SINGAPORE.;	HEDONIC PRICING; TROPICAL VEGETATION; ECOSYSTEM SERVICE VALUATION; URBAN PLANNING; TROPICAL CITY STATE; PUBLIC HOUSING	10.1016/j.ecolecon.2018.03.012	ARTICLE	FUTURE CITIES LABORATORY AT THE SINGAPORE-ETH CENTRE [FI 370074016]	WE WOULD LIKE TO THANK ALEX THIAM KOON YEE FOR PROVIDING THE SINGAPORE VEGETATION MAP AND ADVICE ON ARCGIS. WE WOULD ALSO LIKE TO THANK FRANCESCA MCGRATH, DANIEL RICHARDS, ROMAN CARRASCO AND TAK FUNG FOR COMMENTS ON THE ANALYSIS AND MANUSCRIPT. R.N.B. WAS PARTIALLY SUPPORTED BY THE FUTURE CITIES LABORATORY AT THE SINGAPORE-ETH CENTRE, WHICH WAS ESTABLISHED COLLABORATIVELY BETWEEN ETH ZURICH AND S…	URBAN GREEN SPACE; ECOSYSTEM SERVICES; HOUSING PRICES; AMENITY VALUE; SPATIAL DEPENDENCE; TREE COVER; LANDSCAPE; FOREST; PARKS; MODEL	ECOL. ECON.	ENGLISH			ELSEVIER	2018	BELCHER, RN (AUTOR CORRESPONDENTE), SINGAPORE ETH CTR, FUTURE CITIES LAB, ETH ZURICH, SINGAPORE, SINGAPORE.	0921-8009	ECOLOGICAL ECONOMICS	24	TROPICAL VEGETATION AND RESIDENTIAL PROPERTY VALUE A HEDONIC PRICING ANALYSIS IN SINGAPORE	149	Singapure	1.35208	103.82	-	-
CHUI T;TRINH D	TO MITIGATE THE IMPACTS OF IMPERVIOUS SURFACES IN URBAN AREAS, STRUCTURES SUCH AS BIORETENTION SYSTEMS AND PERMEABLE PAVEMENTS HAVE BEEN INSTALLED TO ENHANCE INFILTRATION IN MANY COUNTRIES. HOWEVER, RELATIVELY LITTLE KNOWLEDGE IS AVAILABLE REGARDING THE PERFORMANCE OF SUCH INFILTRATION-BASED STRUCTURES IN HUMID TROPICAL AND HIGHLY URBANIZED AREAS. THIS STUDY INVESTIGATES THE FEASIBILITY OF ENHANC…		UNIV HONG KONG, DEPT CIVIL ENGN, POK FU LAM, HONG KONG, PEOPLES R CHINA.; NATL UNIV SINGAPORE, DEPT CIVIL & ENVIRONM ENGN, SINGAPORE, SINGAPORE.;	INFILTRATION; STORMWATER MANAGEMENT; LOW-IMPACT DEVELOPMENT; TROPICS; SUSTAINABLE DRAINAGE SYSTEM	10.1002/hyp.10926	ARTICLE			LOW IMPACT DEVELOPMENT; HYDRAULIC PERFORMANCE; WATER MANAGEMENT; RETENTION; RUNOFF; BIORETENTION; HYDROLOGY; SYSTEMS; SURFACE; DESIGN	HYDROL. PROCESS.	ENGLISH			WILEY	2016	CHUI, TFM (AUTOR CORRESPONDENTE), UNIV HONG KONG, DEPT CIVIL ENGN, POK FU LAM, HONG KONG, PEOPLES R CHINA.	0885-6087	HYDROLOGICAL PROCESSES	22	MODELLING INFILTRATION ENHANCEMENT IN A TROPICAL URBAN CATCHMENT FOR IMPROVED STORMWATER MANAGEMENT	30	Singapure	1.35208	103.82	-	-
ACERO J;KOH E;RUEFENACHT L;NORFORD L	TROPICAL CITIES ARE EXPOSED TO HIGH AIR TEMPERATURE AND RELATIVE HUMIDITY THROUGHOUT THE YEAR, CAUSING PEDESTRIAN THERMAL DISCOMFORT. IN THIS WORK, WE PRESENT AN EVALUATION OF THE IMPACT OF URBAN GEOMETRY ON THE OUTDOOR THERMAL COMFORT (OTC) IN SINGAPORE, FOCUSING ON A NEW MIXED-USE HIGH-RISE DEVELOPMENT. DIFFERENT URBAN DESIGN STRATEGIES/SCENARIOS HAVE BEEN ANALYZED: TWO BLOCK FORMS, FOUR STREET…	100775	SINGAPORE MIT ALIANCE REASEARCH & TECNOL SMART, CENSAM, 1 CREATE WAY,09-03, SINGAPORE 138602, SINGAPORE.; SINGAPORE ETH CTR SEC, 1 CREATE WAY,06-03, SINGAPORE 138602, SINGAPORE.; MIT, DEPT ARCHITECTURE, 265 MASSACHUSETTS AVE, CAMBRIDGE, MA 02139 USA.;	TROPICAL CLIMATES; OUTDOOR THERMAL COMFORT METRICS; URBAN GEOMETRY; WEATHER CONDITIONS; ENVI-MET; SPATIO-TEMPORAL ANALYSIS	10.1016/j.uclim.2021.100775	ARTICLE	SINGAPORE'S NATIONAL RESEARCH FOUNDATION (NRF); SINGAPORE-MIT ALLIANCE FOR RESEARCH AND TECHNOLOGY (SMART), TUMCREATE; NATIONAL UNIVERSITY OF SINGAPORE (NUS); SINGAPORE MANAGEMENT UNIVERSITY (SMU); AGENCY FOR SCIENCE, TECHNOLOGY AND RESEARCH (A*STAR)	THE WORK WAS FUNDED BY SINGAPORE'S NATIONAL RESEARCH FOUNDATION (NRF) UNDER ITS VIRTUAL SINGAPORE PROGRAMME. COOLING SINGAPORE IS A COLLABORATIVE PROJECT LED BY THE SINGAPORE-ETH CENTRE (SEC), WITH THE SINGAPORE-MIT ALLIANCE FOR RESEARCH AND TECHNOLOGY (SMART), TUMCREATE (ESTABLISHED BY THE TECHNICAL UNIVERSITY OF MUNICH), THE NATIONAL UNIVERSITY OF SINGAPORE (NUS), THE SINGAPORE MANAGEMENT UNIVE…	STREET CANYON; HEAT-ISLAND; CLIMATE; MICROCLIMATE; IMPACT; TEMPERATURE; HOT; AIR; DESIGN; ENVIRONMENTS	URBAN CLIM.	ENGLISH			ELSEVIER	2021	ACERO, JA (AUTOR CORRESPONDENTE), SINGAPORE MIT ALIANCE REASEARCH & TECNOL SMART, CENSAM, 1 CREATE WAY,09-03, SINGAPORE 138602, SINGAPORE.	2212-0955	URBAN CLIMATE	8	MODELLING THE INFLUENCE OF HIGHRISE URBAN GEOMETRY ON OUTDOOR THERMAL COMFORT IN SINGAPORE	36	Singapure	1.35208	103.82	-	-
TAN B;GAW L;MASOUDI M;RICHARDS D	RAPID URBANIZATION IN MANY PARTS OF THE WORLD HAS INCREASINGLY PUT THE ENVIRONMENT UNDER PRESSURE, WITH NATURAL LANDSCAPES CLEARED TO MAKE WAY FOR BUILT INFRASTRUCTURE. URBAN ECOSYSTEMS, AND THE SERVICES THAT THEY PROVIDE, CAN OFFER NATURE-BASED SOLUTIONS TO THE CHALLENGES OF URBANIZATION. THERE IS INCREASING INTEREST IN BETTER INCORPORATING ECOSYSTEMS INTO URBAN PLANNING AND DESIGN IN ORDER TO D…	610155	SWISS FED INST TECHNOL, SINGAPORE ETH CTR, NAT CAPITAL SINGAPORE, ZURICH, SINGAPORE.; CAMPUS RES EXCELLENCE & TECHNOL ENTERPRISE, SINGAPORE, SINGAPORE.; NATL UNIV SINGAPORE, SCH DESIGN & ENVIRONM, SINGAPORE, SINGAPORE.;	NATURAL CAPITAL; LAND COVER; ENVIRONMENTAL MODELING; URBAN PLANNING; SCENARIOS	10.3389/fenvs.2021.610155	ARTICLE	NATIONAL RESEARCH FOUNDATION, PRIME MINISTER'S OFFICE, SINGAPORE UNDER ITS CAMPUS FOR RESEARCH EXCELLENCE AND TECHNOLOGICAL ENTERPRISE (CREATE) PROGRAM [NRF2016-ITC001-013]	THIS RESEARCH IS SUPPORTED BY THE NATIONAL RESEARCH FOUNDATION, PRIME MINISTER'S OFFICE, SINGAPORE UNDER ITS CAMPUS FOR RESEARCH EXCELLENCE AND TECHNOLOGICAL ENTERPRISE (CREATE) PROGRAM (NRF2016-ITC001-013).	AIR-POLLUTION REMOVAL; BENEFITS; DEMAND; URBANIZATION; MANAGEMENT; CAPACITY; TREES; FLOW	FRONT. ENVIRON. SCI.	ENGLISH			FRONTIERS MEDIA SA	2021	TAN, BA; GAW, LYF (AUTOR CORRESPONDENTE), SWISS FED INST TECHNOL, SINGAPORE ETH CTR, NAT CAPITAL SINGAPORE, ZURICH, SINGAPORE.; TAN, BA; GAW, LYF (AUTOR CORRESPONDENTE), CAMPUS RES EXCELLENCE & TECHNOL ENTERPRISE, SINGAPORE, SINGAPORE.		FRONTIERS IN ENVIRONMENTAL SCIENCE	4	NATUREBASED SOLUTIONS FOR URBAN SUSTAINABILITY AN ECOSYSTEM SERVICES ASSESSMENT OF PLANS FOR SINGAPORES FIRST FOREST TOWN	9	Singapure	1.35208	103.82	-	-
LAN Y;THAM J;JIA S;SARKAR S;FAN W;REID J;ONG C;YU L	THIS STUDY CHARACTERIZES THE IMPACTS OF TRANSPORTED PEAT-FOREST (PF) BURNING SMOKE ON AN URBAN ENVIRONMENT AND EVALUATES ASSOCIATED SOURCE BURNING CONDITIONS BASED ON CARBON PROPERTIES OF PM2.5 AT THE RECEPTOR SITE. WE DEVELOPED AND VALIDATED A THREE-STEP CLASSIFICATION THAT ENABLES SYSTEMATIC AND MORE RAPID IDENTIFICATION OF PF SMOKE IMPACTS ON A TROPICAL URBAN ENVIRONMENT WITH DIVERSE EMISSIONS…	116626	DEPARTMENT OF CIVIL AND ENVIRONMENTAL ENGINEERING, NATIONAL UNIVERSITY OF SINGAPORE117576, SINGAPORE; NUS ENVIRONMENTAL RESEARCH INSTITUTE, NATIONAL UNIVERSITY OF SINGAPORE117411, SINGAPORE; NAVAL RESEARCH LABORATORY, MONTEREY, CA 93943, UNITED STATES; SAW SWEE HOCK SCHOOL OF PUBLIC HEALTH, NATIONAL UNIVERSITY OF SINGAPORE117549, SINGAPORE	BIOMASS BURNING; EQUATORIAL ASIA; FOREST FIRE; SOUTHEAST ASIA; TROPICAL PEATLAND; URBAN AIR QUALITY	10.1016/j.envpol.2021.116626	ARTICLE	R-706-000-032-133, R-706-000-043-490 NATIONAL UNIVERSITY OF SINGAPORENATIONAL UNIVERSITY OF SINGAPORE, NUS NATIONAL ENVIRONMENT AGENCY - SINGAPORENATIONAL ENVIRONMENT AGENCY - SINGAPORE, NEA	AUTHORS THANK MS. YIYUAN SHAN AND XIAORUI WU FOR LEVOGLUCOSAN QUANTIFICATION. THE ON-LINE METEOROLOGICAL DATA WERE PROVIDED BY PROF. M. ROTH AT THE NATIONAL UNIVERSITY OF SINGAPORE ( NUS ). DR. REID’S PARTICIPATION WAS FUNDED BY THE NAVAL RESEARCH LABORATORY BASE RESEARCH PROGRAM. THIS STUDY ( R-706-000-032-133 AND R-706-000-043-490 ) IS SUPPORTED BY THE PROVOST OFFICE, NUS , SINGAPORE, AND THE S…	FORESTRY; ORGANIC CARBON; PEAT; SOIL MOISTURE; URBAN GROWTH; AMBIENT ENVIRONMENT; ATMOSPHERIC PROCESS; BIOMASS BURNING SMOKES; CONCENTRATION RATIO; LOCATION DEPENDENTS; MEAN CONCENTRATIONS; RAPID IDENTIFICATION; SYSTEMATIC IDENTIFICATION; SMOKE; AMMONIA; LEVOGLUCOSAN; NITRATE; ORGANIC CARBON; POTASSIUM; SULFATE; CARBON; AIR QUALITY; ATMOSPHERIC POLLUTION; BIOMASS BURNING; FOREST DYNAMICS; FOREST …	ENVIRON. POLLUT.	ENGLISH	33609858		ELSEVIER LTD	2021	YU, L.E.; DEPARTMENT OF CIVIL & ENVIRONMENTAL ENGINEERING, 10 KENT RIDGE CRESCENT, SINGAPORE; EMAIL: LIYA.YU@NUS.EDU.SG	02697491	ENVIRONMENTAL POLLUTION	4	PEATFOREST BURNING SMOKE IN MARITIME CONTINENT IMPACTS ON RECEPTOR PM25 AND IMPLICATIONS AT EMISSION SOURCES	275	Singapure	1.35208	103.82	-	-
HWANG Y;SEE S;PATIL M	SINGAPOREAN PARKS ARE GENERALLY PLANTED AND MANAGED, BUT THEIR CONTRIBUTION TO URBAN DIVERSITY MAY ALTER OVER TIME. THIS STUDY EXAMINED THE KEY GROWTH PATTERNS OF MANAGED VEGETATION AND FACTORS INFLUENCING FLORAL DIVERSITY THROUGH SHORT-TERM OBSERVATION OF VEGETATION CHANGES IN A TYPICAL TROPICAL URBAN PARK SETTING. THE STUDY SELECTED 222 PLOTS USING A 10M X 10M GRID IN THREE SINGAPOREAN PARKS AN…	127240	NATL UNIV SINGAPORE, SCH DESIGN & ENVIRONM, DEPT ARCHITECTURE, 4 ARCHITECTURE DR, SINGAPORE 117566, SINGAPORE.;	DIVERSITY CHANGES; LANDSCAPE MANAGEMENT; MANAGED VEGETATION; TROPICAL URBAN PARK; VEGETATION GROWTH	10.1016/j.ufug.2021.127240	ARTICLE	NUS-MOE (MINISTRY OF EDUCATION) TIER 1 RESEARCH FUND [R-295-000-146-114, R-295-000-181-114]	THIS WORK WAS MADE POSSIBLE BY FUNDING FROM NUS-MOE (MINISTRY OF EDUCATION) TIER 1 RESEARCH FUND UNDER GRANT NUMBER R-295-000-146-114 AND R-295-000-181-114. THANK YOU TO MUHAMMAD FAIZ BIN ZOHRI, RAMBOLL STUDIO DREISEITL, SINGAPORE (RSD) AND ZI EN JONATHAN YUE (NUS) FOR REVIEWS OF THE INITIAL VERSION OF THE PAPER. THANKS ALSO TO LEONARD NG, TOBIAS BAUR, AND JELLE THERRY (RSD); CHANG HUAI-YAN, NG S…	ECOSYSTEM SERVICES; PUBLIC PERCEPTION; GREEN SPACES; BIODIVERSITY; DIVERSITY; CITY; HETEROGENEITY; PREFERENCE; QUALITY; GROWTH	URBAN FOR. URBAN GREEN.	ENGLISH			ELSEVIER GMBH	2021	HWANG, YH (AUTOR CORRESPONDENTE), NATL UNIV SINGAPORE, SCH DESIGN & ENVIRONM, DEPT ARCHITECTURE, 4 ARCHITECTURE DR, SINGAPORE 117566, SINGAPORE.	1618-8667	URBAN FORESTRY & URBAN GREENING	1	SHORTTERM VEGETATION CHANGES IN TROPICAL URBAN PARKS PATTERNS AND DESIGNMANAGEMENT IMPLICATIONS	64	Singapure	1.35208	103.82	-	-
LIM H;SEGOVIA E;ZIEGLER A	THIS STUDY EXAMINED THE EFFECTS OF TWO SUBSTRATES (SOIL AND COMMERCIAL) AND GRASS ON THE GREEN ROOF RUNOFF QUALITY IN SINGAPORE. TEN EVENTS WERE SAMPLED OVER A 9-MONTH PERIOD. RAINFALL AND GREEN ROOF RUNOFF FROM GRASS AND BARE EXPERIMENTAL CONFIGURATIONS WERE TESTED FOR TOTAL ORGANIC CARBON (TOC), NITROGEN AND PHOSPHORUS NUTRIENTS (NO3--N AND PO43--P), CATIONS/ANIONS AND TRACE METALS (FE, CU, ZN,…		JAMES COOK UNIV, COLL SCI & ENGN, SMITHFIELD, QLD 4878, AUSTRALIA.; NATL UNIV SINGAPORE, DEPT GEOG, KENT RIDGE 117570, SINGAPORE.; MAE JO UNIV, FAC FISHERIES TECHNOL & AQUAT RESOURCES, CHIANG MAI 50210, THAILAND.;	CARBON; EUTROPHICATION; GREEN ROOF WATER QUALITY; NUTRIENTS; TRACE METALS	10.2166/bgs.2021.007	ARTICLE			EVALUATE RUNOFF QUALITY; QUANTITY; MANAGEMENT; RAINWATER; LEACHATE; PERFORMANCE; DYNAMICS; GROWTH; SEDUM; SOIL	BLUE-GREEN SYST.	ENGLISH			IWA PUBLISHING	2021	LIM, HS (AUTOR CORRESPONDENTE), JAMES COOK UNIV, COLL SCI & ENGN, SMITHFIELD, QLD 4878, AUSTRALIA.		BLUE-GREEN SYSTEMS	0	WATER QUALITY IMPACTS OF YOUNG GREEN ROOFS IN A TROPICAL CITY A CASE STUDY FROM SINGAPORE	3	Singapure	1.35208	103.82	-	-
STEFANER K;GHOSH S;YUSOF M;IBRAHIM H;LEITGEB E;SCHINDLBACHER A;KITZLER B	STUDIES OF SOIL GREENHOUSE GAS (GHG) FLUXES (CO2, CH4 AND N2O) FROM TROPICAL SOILS ARE STILL SCARCE AND THE EFFECTS OF URBAN GREEN SPACE MANAGEMENT ON SOIL GHG FLUXES ARE POORLY ADDRESSED. IN ORDER TO ESTABLISH RELIABLE GLOBAL GHG BUDGETS, FIELD MEASUREMENTS OF SOIL GHG FLUXES FROM DIFFERENT LAND USES AND MANAGEMENT PRACTICES IN TROPICAL REGIONS ARE URGENTLY NEEDED. IN THIS STUDY, SOIL FLUXES OF …	147305	AUSTRIAN RES CTR FORESTS, DEPT FOREST ECOL & SOIL, SECKENDORFF GUDENT WEG 8, A-1131 VIENNA, AUSTRIA.; NATL PK BOARD, CTR URBAN GREENERY & ECOL, SINGAPORE 259569, SINGAPORE.; UNIV NEW ENGLAND, SCH ENVIRONM & RURAL SCI, ARMIDALE, NSW 2351, AUSTRALIA.; NATL PK BOARD, INT BIODIVERS CONSERVAT, SINGAPORE 259569, SINGAPORE.; UNIV NAT RESOURCES & LIFE SCI VIENNA, INST SOIL RES, PETER JORDAN STR 82, A-119…	SOIL GHG BUDGET; TROPICAL SOILS; MATURE SECONDARY FOREST; URBAN PARKLAND; COMPOST; LEGUMES	10.1016/j.scitotenv.2021.147305	ARTICLE	NPARKS, SINGAPORE	THIS WORK WAS CONDUCTED WITHIN THE FRAMEWORK OF THE SINSOIL PROJECT ORGANIZED BY NATIONAL PARKS BOARD SINGAPORE (NPARKS) AND THE AUSTRIAN RESEARCH CENTRE FOR FORESTS (BFW, AUSTRIA) . THE PROJECT WAS FUNDED BY THE NPARKS, SINGAPORE. WE WOULD LIKE TO THANK THE BFW COLLEAGUES: ARMIN HOFBAUER, BRIGITTE SCHRAUFSTADTER, RAFFAELA WETTL, EUGENIE FINK, MICHAELA DJORDJEVIC, GUNTHER GOLLOBICH, MICHAEL ENGLI…	LAND-USE CHANGE; MICROBIAL BIOMASS CALIBRATION; FUMIGATION-EXTRACTION METHOD; DISSOLVED ORGANIC-CARBON; NITROUS-OXIDE EMISSIONS; METHANE FLUXES; CO2 EMISSIONS; LITTER INPUTS; NITRIC-OXIDE; RAIN-FOREST	SCI. TOTAL ENVIRON.	ENGLISH			ELSEVIER	2021	STEFANER, K (AUTOR CORRESPONDENTE), AUSTRIAN RES CTR FORESTS, DEPT FOREST ECOL & SOIL, SECKENDORFF GUDENT WEG 8, A-1131 VIENNA, AUSTRIA.; STEFANER, K (AUTOR CORRESPONDENTE), UNIV NAT RESOURCES & LIFE SCI VIENNA, INST SOIL RES, PETER JORDAN STR 82, A-1190 VIENNA, AUSTRIA.	0048-9697	SCIENCE OF THE TOTAL ENVIRONMENT	0	SOIL GREENHOUSE GAS FLUXES FROM A HUMID TROPICAL FOREST AND DIFFERENTLY MANAGED URBAN PARKLAND IN SINGAPORE	786	Singapure	1.35208	103.82	-	-
CHOW M;YUSOP Z;TORIMAN M	DUE TO DIFFERENCES IN RAINFALL REGIMES AND MANAGEMENT PRACTICES, TROPICAL URBAN CATCHMENTS ARE EXPECTED TO BEHAVE DIFFERENTLY FROM TEMPERATE CATCHMENTS IN TERMS OF POLLUTANT SOURCES AND THEIR TRANSPORT MECHANISM. STORM WATER MANAGEMENT MODEL (SWMM) WAS APPLIED TO SIMULATE RUNOFF QUANTITY (PEAKFLOW AND RUNOFF DEPTH) AND QUALITY (TOTAL SUSPENDED SOLIDS AND TOTAL PHOSPHOROUS) IN RESIDENTIAL, COMMERC…		UTM, INST ENVIRONM & WATER RESOURCE MANAGEMENT IPASA, SKUDAI, MALAYSIA.; UTM, WATER RA, SKUDAI, MALAYSIA.; UNIV KEBANGSAAN MALAYSIA, SCH SOCIAL DEV & ENVIRONM STUDIES, BANGI 43600, MALAYSIA.;	BUILD-UP; CALIBRATION; VALIDATION; WASH-OFF	10.1007/s13762-012-0092-0	ARTICLE	MINISTRY OF SCIENCE, TECHNOLOGY AND INNOVATION (MOSTI); UNIVERSITY TEKNOLOGI MALAYSIA	WE WOULD LIKE TO THANK THE MINISTRY OF SCIENCE, TECHNOLOGY AND INNOVATION (MOSTI) AND UNIVERSITY TEKNOLOGI MALAYSIA FOR SUPPORTING THIS RESEARCH. SPECIAL THANK GOES TO PROFESSOR GUSTAFF OLSON FOR REVIEWING THE INITIAL DRAFT OF THIS MANUSCRIPT.	SWMM; CALIBRATION; SYSTEM; IMPACT	INT. J. ENVIRON. SCI. TECHNOL.	ENGLISH			SPRINGER	2012	CHOW, MF (AUTOR CORRESPONDENTE), UTM, INST ENVIRONM & WATER RESOURCE MANAGEMENT IPASA, SKUDAI, MALAYSIA.	1735-1472	INTERNATIONAL JOURNAL OF ENVIRONMENTAL SCIENCE AND TECHNOLOGY	45	MODELLING RUNOFF QUANTITY AND QUALITY IN TROPICAL URBAN CATCHMENTS USING STORM WATER MANAGEMENT MODEL	9	Skudai, Malaysia	1.53677	103.661	-	-
CHOW M;YUSOP Z;SHIRAZI S	INFORMATION ON THE POLLUTION LEVEL AND THE INFLUENCE OF HYDROLOGIC REGIME ON THE STORMWATER POLLUTANT LOADING IN TROPICAL URBAN AREAS ARE STILL SCARCE. MORE LOCAL DATA ARE STILL REQUIRED BECAUSE RAINFALL AND RUNOFF GENERATION PROCESSES IN TROPICAL ENVIRONMENT ARE VERY DIFFERENT FROM THE TEMPERATE REGIONS. THIS STUDY INVESTIGATED THE EXTENT OF URBAN RUNOFF POLLUTION IN RESIDENTIAL, COMMERCIAL, AND…		ACAD SINICA, RCEC, TAIPEI 115, TAIWAN.; UNIV TECHNOL MALAYSIA, WATER RES ALLIANCE WATER RA, JOHOR BAHARU 81310, JOHOR DARUL TAZ, MALAYSIA.; UNIV MALAYA, DEPT CIVIL ENGN, FAC ENGN, KUALA LUMPUR 50603, MALAYSIA.;	EVENT MEAN CONCENTRATION; MULTIPLE LINEAR REGRESSION; STORMWATER; TROPICAL ENVIRONMENT; URBAN RUNOFF	10.1007/s10661-013-3175-6	ARTICLE	JAPANESE SOCIETY FOR THE PROMOTION OF SCIENCE (JSPS); MINISTRY OF HIGHER EDUCATION (MOHE) IN MALAYSIA	THE AUTHORS ARE GRATEFUL TO UTM RESEARCH MANAGEMENT CENTRE (RMC) FOR FACILITATING THIS RESEARCH UNDER VOT GUP 01H72. THIS STUDY WAS ALSO SUPPORTED BY THE ASIAN CORE PROGRAM OF THE JAPANESE SOCIETY FOR THE PROMOTION OF SCIENCE (JSPS) AND THE MINISTRY OF HIGHER EDUCATION (MOHE) IN MALAYSIA.	HIGHWAY RUNOFF; WATER-QUALITY; URBAN ROADS; LAND-USE; BUILDUP; MODELS; SITES; AREA	ENVIRON. MONIT. ASSESS.	ENGLISH	23591675		SPRINGER	2013	CHOW, MF (AUTOR CORRESPONDENTE), ACAD SINICA, RCEC, 128 ACAD RD,SECT 2, TAIPEI 115, TAIWAN.	0167-6369	ENVIRONMENTAL MONITORING AND ASSESSMENT	36	STORM RUNOFF QUALITY AND POLLUTANT LOADING FROM COMMERCIAL RESIDENTIAL AND INDUSTRIAL CATCHMENTS IN THE TROPIC	185	Skudai, Malaysia	1.53677	103.661	-	-
CHOW M;YUSOP Z	THIS STUDY AIMED AT INVESTIGATING THE FIRST FLUSH PHENOMENON FROM RESIDENTIAL, COMMERCIAL AND INDUSTRIAL CATCHMENTS. STORMWATER WAS GRAB SAMPLED AND THE FLOW RATE WAS MEASURED DURING 52 STORM EVENTS. THE DIMENSIONLESS CUMULATIVE POLLUTANT MASS AND RUNOFF VOLUME WERE USED TO DETERMINE THE RUNOFF VOLUME NEEDED TO TRANSPORT 50 AND 80 % OF TOTAL POLLUTANT MASS. ALMOST ALL THE CONSTITUENTS DID NOT SAT…		UNIV TENAGA NASIONAL UNITEN, CTR SUSTAINABLE TECHNOL & ENVIRONM, COLL ENGN, KAJANG 43000, SELANGOR, MALAYSIA.; ACAD SINICA, RCEC, TAIPEI 115, TAIWAN.; UTM, INST ENVIRONM & WATER RESOURCES MANAGEMENT, SKUDAI 81310, JOHOR DARUL TAZ, MALAYSIA.;	FIRST FLUSH; POLLUTANT LOADING; STORMWATER; MASS-BASED FIRST FLUSH	10.1007/s12665-014-3294-6	ARTICLE	ASIAN CORE PROGRAM OF THE JAPANESE SOCIETY FOR THE PROMOTION OF SCIENCE (JSPS); MINISTRY OF EDUCATION, MALAYSIA (MOEM)	THE AUTHORS ARE GRATEFUL TO UTM RESEARCH MANAGEMENT CENTRE (RMC) FOR FACILITATING THIS RESEARCH UNDER VOT GUP 01H72. THIS STUDY WAS ALSO SUPPORTED BY THE ASIAN CORE PROGRAM OF THE JAPANESE SOCIETY FOR THE PROMOTION OF SCIENCE (JSPS) AND THE MINISTRY OF EDUCATION, MALAYSIA (MOEM).	SURFACE RUNOFF; WATER RUNOFF; QUALITY; AREA; 1ST-FLUSH; SOLIDS; CHINA; MASS	ENVIRON. EARTH SCI.	ENGLISH			SPRINGER	2014	CHOW, MF (AUTOR CORRESPONDENTE), ACAD SINICA, RCEC, 128 ACAD RD,SECT 2, TAIPEI 115, TAIWAN.	1866-6280	ENVIRONMENTAL EARTH SCIENCES	21	SIZING FIRST FLUSH POLLUTANT LOADING OF STORMWATER RUNOFF IN TROPICAL URBAN CATCHMENTS	72	Skudai, Malaysia	1.53677	103.661	-	-
CHOW M;YUSOP Z	THE CHARACTERISTICS OF URBAN STORMWATER POLLUTION IN THE TROPICS ARE STILL POORLY UNDERSTOOD. THIS ISSUE IS CRUCIAL TO THE TROPICAL ENVIRONMENT BECAUSE ITS RAINFALL AND RUNOFF GENERATION PROCESSES ARE SO DIFFERENT FROM TEMPERATE REGIONS. IN THIS REGARD, A STORMWATER MONITORING PROGRAM WAS CARRIED OUT AT THREE URBAN CATCHMENTS (E.G. RESIDENTIAL, COMMERCIAL AND INDUSTRIAL) IN THE SOUTHERN PART OF P…		ACAD SINICA, RCEC, TAIPEI 115, TAIWAN.; UTM, INST ENVIRONM & WATER RESOURCES MANAGEMENT IPASA, JOHOR BAHARU 81310, JOHOR DARUL TAZ, MALAYSIA.;	POLLUTANT SOURCES; PRINCIPAL COMPONENT ANALYSIS; STORMWATER; TROPICAL	10.2166/wst.2013.574	ARTICLE	ASIAN CORE PROGRAM OF THE JAPANESE SOCIETY FOR THE PROMOTION OF SCIENCE (JSPS); MINISTRY OF HIGHER EDUCATION (MOHE) IN MALAYSIA	THE AUTHORS ARE GRATEFUL TO THE UNIVERSITI TEKNOLOGI MALAYSIA (UTM) RESEARCH MANAGEMENT CENTER (RMC) FOR FACILITATING THIS RESEARCH UNDER VOT GUP 01H72. THIS STUDY WAS ALSO SUPPORTED BY THE ASIAN CORE PROGRAM OF THE JAPANESE SOCIETY FOR THE PROMOTION OF SCIENCE (JSPS) AND THE MINISTRY OF HIGHER EDUCATION (MOHE) IN MALAYSIA.	MULTIVARIATE STATISTICAL TECHNIQUES; WATER-QUALITY; LAND-USE; POLLUTANTS; ROADS; INDIA	WATER SCI. TECHNOL.	ENGLISH	24473291		IWA PUBLISHING	2014	CHOW, MF (AUTOR CORRESPONDENTE), ACAD SINICA, RCEC, 128 ACAD RD,SECT 2, TAIPEI 115, TAIWAN.	0273-1223	WATER SCIENCE AND TECHNOLOGY	20	CHARACTERIZATION AND SOURCE IDENTIFICATION OF STORMWATER RUNOFF IN TROPICAL URBAN CATCHMENTS	69	Skudai, Malaysia	1.53677	103.661	-	-
CHOW M;YUSOP Z;TORIMAN M	URBANIZATION AND FREQUENT STORMS PLAY IMPORTANT ROLES IN INCREASING FAECAL BACTERIA POLLUTION, ESPECIALLY FOR TROPICAL URBAN CATCHMENTS. HOWEVER, ONLY LITTLE INFORMATION ON THE FAECAL BACTERIA LEVELS FROM DIFFERENT LAND USE TYPES AND THE FACTORS THAT INFLUENCE BACTERIA CONCENTRATIONS IS AVAILABLE. THUS, THE OBJECTIVES OF THIS STUDY WERE TO QUANTIFY THE LEVELS AND TRANSPORT MECHANISM OF FAECAL COL…		UNIV TEKNOL MALAYSIA UTM, INST ENVIRONM & WATER RESOURCES MANAGEMENT IPASA, JOHOR BAHARU 81310, JOHOR DARUL TAZ, MALAYSIA.; UNIV KEBANGSAAN MALAYSIA UKM, SCH SOCIAL DEV & ENVIRONM STUDIES, BANGI SELANGOR 43600, MALAYSIA.;	BACTERIA; EVENT MEAN CONCENTRATION; FAECAL COLIFORM; FIRST FLUSH; STORMWATER	10.2166/wst.2013.048	ARTICLE	RESEARCH MANAGEMENT CENTRE OF UNIVERSITI TEKNOLOGI MALAYSIA (UTM); MINISTRY OF HIGHER EDUCATION, MALAYSIA (MOHE); JAPANESE SOCIETY FOR THE PROMOTION OF SCIENCE (JSPS)	THE AUTHORS WOULD LIKE TO THANK THE RESEARCH MANAGEMENT CENTRE OF UNIVERSITI TEKNOLOGI MALAYSIA (UTM) FOR PROVIDING A RESEARCH UNIVERSITY GRANT. THIS STUDY IS ALSO PARTLY SUPPORTED BY THE MINISTRY OF HIGHER EDUCATION, MALAYSIA (MOHE) AND THE JAPANESE SOCIETY FOR THE PROMOTION OF SCIENCE (JSPS) UNDER THE ASIAN CORE PROGRAM. WE ARE INDEBTED TO MISS KHAIRONI FOR HER ASSISTANCE IN BACTERIAL ANALYSIS.	INDICATOR BACTERIA; STORMWATER RUNOFF; LAND-USE; 1ST FLUSH; WATER; MANAGEMENT; PARTICLES; QUALITY	WATER SCI. TECHNOL.	ENGLISH	23579839		IWA PUBLISHING	2013	CHOW, MF (AUTOR CORRESPONDENTE), UNIV TEKNOL MALAYSIA UTM, INST ENVIRONM & WATER RESOURCES MANAGEMENT IPASA, JOHOR BAHARU 81310, JOHOR DARUL TAZ, MALAYSIA.	0273-1223	WATER SCIENCE AND TECHNOLOGY	14	LEVEL AND TRANSPORT PATTERN OF FAECAL COLIFORM BACTERIA FROM TROPICAL URBAN CATCHMENTS	67	Skudai, Malaysia	1.53677	103.661	-	-
CHANG H;LEE Y	WE ASSESSED BIRD DIVERSITY AND NESTING ACTIVITY IN 54 URBAN PARKS IN THE CORE OF A HIGHLY POPULATED EAST-ASIAN TROPICAL CITY TO INVESTIGATE THE EFFECTS OF AREA, ISOLATION, HABITAT HETEROGENEITY, AND HUMAN DISTURBANCES ON AVIFAUNA. TREE DENSITY AND HETEROGENEITY WERE LOWER WHILE ISOLATION WAS GREATER IN SMALL THAN IN LARGE OR MEDIUM-SIZED PARKS. YET, PARK FEATURES WERE OFTEN INTERRELATED, WITH ISO…		NATL CHENG KUNG UNIV, DEPT LIFE SCI, TAINAN 701, TAIWAN.; MING SHIANG ECOL CENSUS CONSULTANT, TAICHUNG 402, TAIWAN.;	BIRDS; DISTURBANCE; HABITAT; HETEROGENEITY; ISOLATION; TROPICAL URBAN PARKS	10.1007/s11252-015-0481-5	ARTICLE	NATIONAL SCIENCE COUNCIL TAIWAN [96-2621-B-006-005-MY3]	WE THANK SY CHANG, WM CHEN, JH CHEN, YJ CHUANG, WC CHU, LW LI, YH LIN, YJ TSAO, HA YANG, AND WC WU, FOR ASSISTING IN THE FIELD, AND NUMEROUS PARK STAFF FOR LOGISTIC SUPPORT. THIS STUDY WAS SUPPORTED IN PART BY A GRANT (96-2621-B-006-005-MY3; NATIONAL SCIENCE COUNCIL TAIWAN) TO YFL.	NEST-SITE SELECTION; CATS FELIS-CATUS; SPECIES RICHNESS; HABITAT FRAGMENTATION; BREEDING BIRDS; SMALL WOODS; LANDSCAPE; DIVERSITY; URBANIZATION; COMMUNITIES	URBAN ECOSYST.	ENGLISH			SPRINGER	2016	LEE, YF (AUTOR CORRESPONDENTE), NATL CHENG KUNG UNIV, DEPT LIFE SCI, TAINAN 701, TAIWAN.	1083-8155	URBAN ECOSYSTEMS	17	EFFECTS OF AREA SIZE HETEROGENEITY ISOLATION AND DISTURBANCES ON URBAN PARK AVIFAUNA IN A HIGHLY POPULATED TROPICAL CITY	19	Tainan, Taiwan	22.9997	120.227	-	-
BARTORILA M;LUSETT M	THE INTEGRATION OF NATURAL SPACES IN URBAN PLANNING IS AN ACCESSIBLE RESOURCE FOR URBAN EFFICIENCY AND A BETTER QUALITY OF LIFE. IN MEXICO, THE DIFFUSE CITY, WITH A SIMPLIFIED PLANNING SYSTEM, DEGRADES NATURAL ECOSYSTEMS AND FAILS TO MAKE EFFICIENT USE OF ITS. REGIONAL PLANNING IS AN IDEAL MEANS FOR THE CONSERVATION OF BIODIVERSITY COMPATIBLE WITH URBAN DEVELOPMENT. TROPICAL CITIES PRESENT CONDIT…		NACIONALIDAD: ITALIANO; ADSCRIPCIÓN: FACULTAD DE INGENIERÍA, UNIVERSIDAD AUTÓNOMA DE QUERÉTARO, MEXICO; NACIONALIDAD: MEXICANA; ADSCRIPCIÓN: PROFESORA DE LA UNIVERSIDAD AUTÓNOMA DE TAMAULIPAS (UAT), MÉXICO; DOCTORA POR LA UNIVERSIDAD POLITÉCNICA DE CATALUÑA, BARCELONA, SPAIN	CIUDAD RESILIENTE; CIUDADES TROPICALES; ECOTONOS URBANOS; RESILIENT CITY; TROPICAL CITIES; URBAN ECOTONES	10.29105/contexto15.23-286	ARTICLE		NA NA NA		CONTEXTO	ENGLISH; SPANISH		23	UNIVERSIDAD AUTONOMA DE NUEVO LEON	2021	BARTORILA, M.Á.; NACIONALIDAD: ITALIANO; ADSCRIPCIÓN: FACULTAD DE INGENIERÍA, MEXICO; EMAIL: MBARTORILA@GMAIL.COM	20071639	CONTEXTO	0	BIODIVERSITY AND REGIONAL PLANNING TAMPICO POSSIBLE CONVERSION OF FROM INDUSTRIAL CITY INTO THE METROPOLIS OF THE MANGROVES BIODIVERSIDAD Y ORDENAMIENTO TERRITORIAL TAMPICO POSIBLE RECONVERSIÓN DE LA CIUDAD INDUSTRIAL A LA METRÓPOLI DE LOS MANGLARES	15	Tampico, Mexico	22.247	-97.862	-	-
UPADHYAY S;SINGH R;VERMA P;RAGHUBANSHI A	URBAN ECOSYSTEMS, THE HETEROGENEOUS AND RAPIDLY CHANGING LANDSCAPE, SHOWED A CONSIDERABLE IMPACT ON THE GLOBAL C CYCLE. HOWEVER, STUDIES ENCOMPASSING THE SPATIAL DIFFERENCES IN URBAN LAND USES ON SOIL C DYNAMICS ARE LIMITED IN TROPICAL ECOSYSTEMS. IN THIS STUDY, SEASONAL AND TEMPORAL VARIABILITY IN SOIL CO2 EFFLUX (SCE) AND ITS REGULATORY PHYSICOCHEMICAL VARIABLES UNDER FIVE URBAN LAND USE CLASSE…	113141	BANARAS HINDU UNIV, INST ENVIRONM & SUSTAINABLE DEV IESD, INTEGRAT ECOL LAB IEL, VARANASI 221005, UTTAR PRADESH, INDIA.;	ANTHROPOGENIC IMPACT; LAND USE; NUTRIENT AVAILABILITY; PHYSICOCHEMICAL PROPERTIES; SOIL RESPIRATION; URBAN ECOSYSTEM	10.1016/j.jenvman.2021.113141	ARTICLE	UNIVERSITY GRANTS COMMISSION (UGC), NEW DELHI, INDIA	SU AND RS ARE THANKFUL TO PROF. HEMA SINGH, DEPARTMENT OF BOTANY, INSTITUTE OF SCIENCE, BANARAS HINDU UNIVERSITY, VARANASI FOR HER HELP AND SUPPORT DURING THE STUDY. SU EXTENDS HER THANKS TO DR. RAHUL BHADOURIA, MR. SHIVAM SINGH, DR. TALAT AFREEN, MR. ASHUTOSH SINGH AND MR. SANJAY YADAV, DEPARTMENT OF BOTANY, BHU FOR THEIR HELP DURING SAMPLING AND EXPERIMENTATION. SU, RS AND PV ACKNOWLEDGE THE FI…	ORGANIC-CARBON STOCKS; RESIDENTIAL LAWNS; EXTRACTION METHOD; DIOXIDE EFFLUX; R-PACKAGE; RESPIRATION; URBANIZATION; TEMPERATURE; SENSITIVITY; EMISSIONS	J. ENVIRON. MANAGE.	ENGLISH	34198176		ACADEMIC PRESS LTD- ELSEVIER SCIENCE LTD	2021	RAGHUBANSHI, AS (AUTOR CORRESPONDENTE), BANARAS HINDU UNIV, INST ENVIRONM & SUSTAINABLE DEV IESD, VARANASI 221005, UTTAR PRADESH, INDIA.	0301-4797	JOURNAL OF ENVIRONMENTAL MANAGEMENT	2	SPATIOTEMPORAL VARIABILITY IN SOIL CO2 EFFLUX AND REGULATORY PHYSICOCHEMICAL PARAMETERS FROM THE TROPICAL URBAN NATURAL AND ANTHROPOGENIC LAND USE CLASSES	295	Varanasi, India	25.3096	83.0057	-	-
ALI S;LI B	TROPICAL CITIES CURRENTLY FACE ISSUES OF CLIMATE CHANGE RESULTING FROM RAPID URBANIZATION AND THE IMPACT OF URBAN MORPHOLOGICAL TRANSFORMATIONS ON THE MICROCLIMATE. THE ANALYSIS OF URBAN PHYSICAL FORMS AND PATTERNS IS A REALISTICMETHODFOR QUANTIFYING THESE IMPACTS. THIS WORK EXAMINED THE IMPACT OF MORPHOLOGICAL TRANSFORMATIONS OF AN URBAN SITE IN WUHAN, CHINA, ON THE MICROTHERMAL ENVIRONMENT AT D…	182	HUAZHONG UNIV SCI & TECHNOL, SCH ARCHITECTURE & URBAN PLANNING, WUHAN 430074, HUBEI, PEOPLES R CHINA.; HUAZHONG UNIV SCI & TECHNOL, GREEN ARCHITECTURE RES CTR, SCH ARCHITECTURE & URBAN PLANNING, LUOYU RD 1037, WUHAN 430074, HUBEI, PEOPLES R CHINA.;	URBAN TRANSFORMATION; MICROCLIMATE; BUILT-UP INFLUENCE; ENVI-MET SIMULATION; AIR TEMPERATURE	10.3390/buildings8120182	ARTICLE	NSFC [51538004]; HEC	THIS RESEARCH WAS FUNDED BY NSFC, GRANT NUMBER 51538004 AND THE APC WAS FUNDED BY HEC.	GREEN SPACES; HEAT; COMFORT; CITY; MITIGATION; ENERGY; AIR; MICROCLIMATE; THESSALONIKI; STRATEGIES	BUILDINGS-BASEL	ENGLISH			MDPI	2018	ALI, S (AUTOR CORRESPONDENTE), HUAZHONG UNIV SCI & TECHNOL, SCH ARCHITECTURE & URBAN PLANNING, WUHAN 430074, HUBEI, PEOPLES R CHINA.		BUILDINGS	1	EVALUATING THE IMPACT OF THE MORPHOLOGICAL TRANSFORMATION OF URBAN SITES ON THE URBAN THERMAL MICROENVIRONMENT	8	Wuhan, China	30.582	114.268	-	-
ANNE A;EBENEZER S;VALERIE D;PIERRE N;CEDRIC D;STEPHANIE N;FRANCOIS D;MAGLOIRE K	LOWLANDS OF YAOUNDE, CAMEROON ARE FACING SOIL POLLUTION DUE TO ALL TYPE OF ORGANIC AND INORGANIC WASTES, PARTICULARLY HEAVY METAL DUE TO ANTHROPOGENIC ACTIVITIES. IDENTIFYING MACROPHYTES SPECIES ABLE TO DEVELOP ON HEAVY METAL POLLUTED SOILS REMAINS AN ESSENTIAL STEP IN THE PHYTOREMEDIATION PROCESS WHICH USED LIVING GREEN PLANTS. IN THIS STUDY, FLORISTIC SURVEYS USING THE QUADRAT METHOD WERE CONDU…		UNIV YAOUNDE I, FAC SCI, DEPT PLANT BIOL, LAB BIOTECHNOL & ENVIRONM, POB 8250, YAOUNDE, CAMEROON.; UNIV BAMENDA, DEPT PLANT BIOL, BAMENDA, CAMEROON.; INST AGR RES DEV IRAD, BERTOUA, CAMEROON.; UNIV YAOUNDE I, DEPT PLANT BIOL, LAB PHYTOPATHOL BIOTECHNOL & ENVIRONM, YAOUNDE, CAMEROON.; CTR DEV RES, DEPT ECOL & NAT RESOURCES MANAGEMENT, BONN, GERMANY.;	CAMEROON; FLORISTIC SURVEYS; LOWLAND; POLLUTION; TROPICAL URBAN AREA	10.1080/15226514.2021.1884183	ARTICLE				INT. J. PHYTOREMEDIAT.	ENGLISH	33765403		TAYLOR & FRANCIS INC	2021	ANNE, A (AUTOR CORRESPONDENTE), UNIV YAOUNDE I, FAC SCI, DEPT PLANT BIOL, LAB BIOTECHNOL & ENVIRONM, POB 8250, YAOUNDE, CAMEROON.	1522-6514	INTERNATIONAL JOURNAL OF PHYTOREMEDIATION	0	FLORISTIC SURVEYS OF SOME LOWLANDS POLLUTED OF A TROPICAL URBAN AREA THE CASE OF YAOUNDE CAMEROON	23	Yaounde, Cameroon	3.84803	11.5021	-	-
